# Supplementary material for: Racial disparities of Black Americans hospitalized for decompensated liver cirrhosis
Source: BMC Gastroenterol. 2020 Jul 29;20:245. doi: 10.1186/s12876-020-01392-y (PMC7391571; doi:10.1186/s12876-020-01392-y)
Supplement: Supplementary file 1 — Additional file 1. [file 12876_2020_1392_MOESM1_ESM.xls]

## Sheet: Export Worksheet
PAT_MRN_ID	HOSP_ADMSN_TIME	HOSP_DISCH_TIME	WBC_VAL	WBC_RSLT_DT	PLATELET_VAL	PLATELET_RSLT_DT	SODIUM_VAL	SODIUM_RSLT_DT	CREATININE_VAL	CREATININE_RSLT_DT	BILIRUBIN_VAL	BILIRUBIN_RSLT_DT	AST_VAL	AST_RSLT_DT	ALT_VAL	ALT_RSLT_DT	ALP_VAL	ALP_RSLT_DT	ALBUMIN_VAL	ALBUMIN_RSLT_DT	INR	TRNSFSN	Tested LnL	Ln L	Tested LnV	Ln V	Tested LnJ	LnJ	Score	MELD score	MELD(i) + 1.32*(137-Na) – [0.033*MELD(i)*(137-Na)]	MELD-NA	Ethnicity (1 = Non-Hispanic White, 2 = Hispanic, 3 = Black or African American, 4 = Asian, 5 = American Indian & Alaska Native, 6 = Native Hawaiian & Other Pacific Islander, 7= Two or more races, 0 = Unknown/Information unavailable)	Hx of DM (0,1)	Hx of CAD or CHF (0,1)	Hx of COPD (0,1)	Hx of Smoking (0,1)	# of admissions during study period	Total hospital days admitted	# of 30 day readmissions	# of 90 day readmissions	Obtained liver transplantation (0,1)	30 day mortality (0,1)	90 day mortality (0,1)	Presence of encephalopathy (0,1)	Presensce of Varices (0,1)	Presence of ascities (0,1)	History of liver cancer (0,1)	Correct use of BB in the setting of variceal bleeding (0,1)
1095133	16-JUL-08	27-JUL-08	14.7	2008-07-27	46	2008-07-27	143	2008-07-27	0.87	2008-07-27	13.6	2008-07-27	80	2008-07-27	34	2008-07-27	61	2008-07-27	4.5	27-JUL-08	3.39	Y	2.61007	2.61007	1.22083	1.22083	1	-0.139262	39.5394	39.5394	39.4482	39	1	0	0	0	0
1790508	03-FEB-09	04-FEB-09	6	04-FEB-09	91	04-FEB-09	134	04-FEB-09	1.11	04-FEB-09	9999999	03-FEB-09	36	03-FEB-09	28	03-FEB-09	156	`	3.7	03-FEB-09	0.87	Y	16.1181	16.1181	-0.139262	-0.139262	0.10436	0.10436	66.7954	40	40	40
0635279	30-JAN-08	01-FEB-08	9.9	28-JUL-09	64	28-JUL-09	135	28-JUL-09	7.86	28-JUL-09	9999999	28-JUL-09	49	28-JUL-09	21	28-JUL-09	63	28-JUL-09	2.4	28-JUL-09	1.57	Y	16.1181	16.1181	0.451076	0.451076	2.06179	2.06179	92.1397	40	40	40
2057551	24-MAY-11	03-JUN-11	28.3	03-JUN-11	9999999	03-JUN-11	146	03-JUN-11	1.56	03-JUN-11	9999999	26-MAY-11	165	25-MAY-11	69	25-MAY-11	81	25-MAY-11	2.2	25-MAY-11	2.72	Y	16.1181	16.1181	1.00063	1.00063	0.444686	0.444686	82.8191	40	40	40
1261159	29-MAR-12	01-APR-12	7.1	01-APR-12	64	01-APR-12	140	01-APR-12	1.08	01-APR-12	9999999	29-MAR-12	51	29-MAR-12	15	29-MAR-12	54	29-MAR-12	2	29-MAR-12	1.31	Y	16.1181	16.1181	0.270027	0.270027	0.076961	0.076961	71.1172	40	40	40
1452759	08-FEB-10	10-FEB-10	8.6	22-AUG-13	136	22-AUG-13	132	22-AUG-13	0.83	22-AUG-13	0.5	22-AUG-13	19	22-AUG-13	23	22-AUG-13	49	22-AUG-13		22-AUG-13	1.2	Y	1	-0.693147	0.182322	0.182322	1	-0.18633	21.822	21.822	24.8214	25
1072547	01-JUN-12	05-JUN-12	4.4	2018-05-07	81	2018-04-30	132	2018-05-07	1.03	2018-05-07	19.7	2018-05-07	364	2018-05-07	121	2018-05-07	278	2018-05-07	2.5	2018-05-07	1.42	Y	2.98062	2.98062	0.350657	0.350657	0.0295588	0.0295588	21.907	21.907	24.8923	25	3	0	0	0	1	3	6	0	0	0	0	0	0	0	1	0	1
1076287	22-OCT-12	25-OCT-12	8.8	06-SEP-15	270	06-SEP-15	138	06-SEP-15	1.01	06-SEP-15	5.4	06-SEP-15	80	06-SEP-15	22	06-SEP-15	216	06-SEP-15	2	06-SEP-15	1.42		1.6864	1.6864	0.350657	0.350657	0.00995033	0.00995033	16.8272	16.8272	16.0625	16	1	0	0	0	1	1	3	0	0	0	0	0	0		1	0
8151839	21-JAN-13	24-JAN-13	2.3	21-JUN-16	176	21-JUN-16	138	21-JUN-16	187.26	21-JUN-16	0.9	01-MAR-16	39	01-MAR-16	26	01-MAR-16	144	01-MAR-16	2.9	20-NOV-15	0.90	Y	1	-0.105361	-0.105361	-0.105361	5.2325	5.2325	59.105	40	40	40
7128404	2016-08-22	2016-08-23	5.4	2017-07-05	142	2017-07-05	138	2017-07-05	0.84	2017-07-05	1.3	2017-07-05	31	2017-07-05	24	2017-07-05	141	2017-07-05	3.5	2017-07-05	1.55	Y	0.262364	0.262364	0.438255	0.438255	1	-0.174353	21.9002	21.9002	21.3029	21	1	0	0	0	0	1	0	0	0	0	0	0	0	1	1	0	1
1530303	21-FEB-12	22-FEB-12																					1	#NUM!	1	#NUM!	1	#NUM!	30.98	30.98	NA	#VALUE!
1846997	11-JUL-08	15-JUL-08	15.2	11-JUL-08	9999999	11-JUL-08	120	11-JUL-08	3.46	11-JUL-08	9999999	11-JUL-08	93	11-JUL-08	27	11-JUL-08	106	11-JUL-08	1.6	11-JUL-08	2.49	Y	16.1181	16.1181	0.912283	0.912283	1.24127	1.24127	89.4529	40	40	40
0332759	14-DEC-10	26-DEC-10	1.4	26-DEC-10	44	26-DEC-10	138	26-DEC-10	0.91	26-DEC-10	0.7	26-DEC-10	58	26-DEC-10	29	26-DEC-10	101	26-DEC-10	2.5	26-DEC-10	1.35	Y	1	-0.356675	0.300105	0.300105	1	-0.0943107	23.1412	23.1412	22.5848	23
2075237	11-APR-11	14-APR-11	3.3	13-APR-11	39	13-APR-11	136	13-APR-11	60.2	13-APR-11	9999999	13-APR-11	128	13-APR-11	113	13-APR-11	217	13-APR-11	2.7	13-APR-11	2.02	Y	16.1181	16.1181	0.703098	0.703098	4.09767	4.09767	114.446	40	40	40
0307595	21-DEC-09	26-DEC-09	17.5	11-MAY-11	9999999	11-MAY-11	138	11-MAY-11	9999999	11-MAY-11	2.5	10-MAY-11	629	10-MAY-11	101	10-MAY-11	180	10-MAY-11	2	10-MAY-11	1.51	Y	0.916291	0.916291	0.41211	0.41211	16.1181	16.1181	168.759	40	40	40
1693026	04-JUN-12	06-JUN-12	7.3	06-JUN-12	9999999	06-JUN-12	128	06-JUN-12	0.86	06-JUN-12	8.3	06-JUN-12	123	06-JUN-12	69	06-JUN-12	105	06-JUN-12	1.1	06-JUN-12	1.58		2.11626	2.11626	0.457425	0.457425	1	-0.150823	29.1226	29.1226	32.3532	32
1319255	2013-09-29	2013-10-10	6.5	10-OCT-13	212	10-OCT-13	120	10-OCT-13	1.39	10-OCT-13	2.7	07-OCT-13	63	07-OCT-13	26	07-OCT-13	92	07-OCT-13	1.8	07-OCT-13	1.20	N	0.993252	0.993252	0.182322	0.182322	0.329304	0.329304	15.3779	15.3779	29.1909	29	1	0	0	0	1	4	40	3	3	0	0	0	1	0	1	0
0993114	20-JUL-13	23-JUL-13	5.9	21-JUL-14	85	21-JUL-14	140	21-JUL-14	0.58	21-JUL-14	3.6	21-JUL-14	291	21-JUL-14	83	21-JUL-14	182	21-JUL-14	2.1	21-JUL-14	1.18		1.28093	1.28093	0.165514	0.165514	1	-0.544727	22.6957	22.6957	20.9826	21	1	0	0	0	1	5	73	2	2		0	0	1	1	1	1	0
7019091	28-OCT-14	30-OCT-14	3.9	29-OCT-14	102	29-OCT-14	137	29-OCT-14	1.89	29-OCT-14	3	29-OCT-14	121	29-OCT-14	55	29-OCT-14	171	29-OCT-14	1.9	29-OCT-14	1.66	Y	1.09861	1.09861	0.506818	0.506818	0.636577	0.636577	22.3512	22.3512	22.3512	22	4	0	0	0	1	2	27	1	1	0	1	1	1	1	1	0	1
2010568	09-NOV-09	16-NOV-09	4.8	2018-01-27	137	2018-01-27	142	2018-01-27	0.7	2018-01-27	1.4	2018-01-27	39	2018-01-27	32	2018-01-27	226	2018-01-27	2.6	2018-01-27	1.29	Y	0.336472	0.336472	0.254642	0.254642	1	-0.356675	20.1239	20.1239	16.8443	17	2	0	1	0	1	3	35	0	1	0	0	0	1	1	1	0	1
8424147	23-FEB-10	25-FEB-10	6.9	31-MAR-10	143	31-MAR-10	132	31-MAR-10	0.97	31-MAR-10	1.3	31-MAR-10	64	31-MAR-10	27	31-MAR-10	952	31-MAR-10	2.7	31-MAR-10	1.27	Y	0.262364	0.262364	0.239017	0.239017	1	-0.0304592	19.6687	19.6687	23.0234	23
1479602	12-MAR-11	19-MAR-11	6.1	19-MAR-11	9999999	19-MAR-11	143	19-MAR-11	1.2	19-MAR-11	9999999	14-MAR-11	149	12-MAR-11	70	12-MAR-11	128	12-MAR-11	1.9	12-MAR-11	1.40	Y	16.1181	16.1181	0.336472	0.336472	0.182322	0.182322	72.8697	40	40	40
2109188	16-NOV-11	18-NOV-11	4	18-NOV-11	98	18-NOV-11	139	18-NOV-11	0.65	18-NOV-11	0.9	16-NOV-11	45	16-NOV-11	30	16-NOV-11	157	16-NOV-11	2.6	16-NOV-11	1.33		1	-0.105361	0.285179	0.285179	1	-0.430783	22.974	22.974	21.8503	22		1	1	0	0	1	2	0	0	0	0	0	1		0	0
2110561	19-DEC-11	24-DEC-11	2.5	24-DEC-11	9999999	24-DEC-11	137	23-DEC-11	0.85	23-DEC-11	9999999	02-DEC-11	41	29-NOV-11	27	29-NOV-11	55	29-NOV-11	2.4	29-NOV-11	1.58	Y	16.1181	16.1181	0.457425	0.457425	1	-0.162519	82.0496	40	40	40
1730358	30-APR-12	15-MAY-12	8.7	14-MAY-12	9999999	14-MAY-12	137	14-MAY-12	0.83	14-MAY-12	0.8	11-MAY-12	30	11-MAY-12	11	11-MAY-12	113	11-MAY-12	1.4	11-MAY-12	1.16	Y	1	-0.223144	0.14842	0.14842	1	-0.18633	21.4423	21.4423	21.4423	21
8245178	24-JUL-12	27-JUL-12	17.2	26-JUL-12	608	26-JUL-12	129	26-JUL-12	1.19	26-JUL-12	9999999	26-JUL-12	44	26-JUL-12	37	26-JUL-12	459	26-JUL-12	2.2	26-JUL-12	1.29		16.1181	16.1181	0.254642	0.254642	0.173953	0.173953	71.8731	40	40	40
1329568	29-JAN-13	01-FEB-13	2.4	2013-06-28	50	2013-06-28	139	2013-06-28	0.59	2013-06-28	18.1	2013-06-28	64	2013-06-28	40	2013-06-28	55	2013-06-28	2.7	28-JUN-13	3.07	Y	2.89591	2.89591	1.12168	1.12168	1	-0.527633	39.5093	39.5093	39.477	39	2	0	0	0	0	3	28	1	0	0	0	0	0	1	1	0	1
0513286	03-AUG-13	05-AUG-13	5.4	10-AUG-13	154	10-AUG-13	133	10-AUG-13	1.12	10-AUG-13	0.7	04-AUG-13	21	04-AUG-13	11	04-AUG-13	121	04-AUG-13	3.3	04-AUG-13	1.18		1	-0.356675	0.165514	0.165514	0.113329	0.113329	13.1483	13.1483	16.6927	17	1	0	0	1	1	3	9	1	1	0	0	0	1	1	1	0
2294124	11-FEB-14	24-FEB-14	5.9	23-FEB-14	164	23-FEB-14	136	23-FEB-14	0.75	23-FEB-14	0.7	11-FEB-14	80	11-FEB-14	35	11-FEB-14	95	11-FEB-14	3.3	11-FEB-14	1.15	Y	1	-0.356675	0.139762	0.139762	1	-0.287682	21.3453	21.3453	21.9609	22	1	0	0	1	1	1	13	0	0	0	0	0	1	1	0	0	1
2230355	01-JUN-14	05-JUN-14	2.4	05-JUN-14	55	05-JUN-14	137	04-JUN-14	0.38	04-JUN-14	1.9	02-JUN-14	55	02-JUN-14	36	02-JUN-14	200	02-JUN-14	3	11-JUN-14	1.22	Y	0.641854	0.641854	0.198851	0.198851	1	-0.967584	20.6533	20.6533	20.6533	21		0	0	0	1	1	4	0	0	0	0	0	0	0	0	0
1023104	20-AUG-13	22-AUG-13	10.9	06-FEB-15	333	06-FEB-15	132	06-FEB-15	1.63	06-FEB-15	2.2	27-JAN-15	29	27-JAN-15	26	27-JAN-15	245	27-JAN-15	3.3	27-JAN-15	1.05	Y	0.788457	0.788457	0.0487902	0.0487902	0.48858	0.48858	14.6325	14.6325	18.8182	19		1	0	1	1	11
1414046	01-FEB-15	07-FEB-15	25.3	04-FEB-15	35	04-FEB-15	133	04-FEB-15	0.58	04-FEB-15	5.4	01-FEB-15	53	01-FEB-15	35	01-FEB-15	216	01-FEB-15	2.3	01-FEB-15	1.37		1.6864	1.6864	0.314811	0.314811	1	-0.544727	25.9005	25.9005	27.7616	28	2	0	0	0	0	2	11	0	0	0	0	0	1	1	1	1	1
0233353	27-JUL-15	30-JUL-15	4.2	22-AUG-15	90	22-AUG-15	136	22-AUG-15	0.86	22-AUG-15	7.1	22-AUG-15	84	22-AUG-15	24	22-AUG-15	49	22-AUG-15	3.2	22-AUG-15	1.32	Y	1.96009	1.96009	0.277632	0.277632	1	-0.150823	26.5186	26.5186	26.9635	27	2	1	0	0	1	2	4	0	0	0	0	0	1	1	1	0	1
0371057	20-SEP-15	22-SEP-15	4.6	22-SEP-15	132	22-SEP-15	136	22-SEP-15	1.95	22-SEP-15	1.2	22-SEP-15	46	22-SEP-15	21	22-SEP-15	125	22-SEP-15	2.4	22-SEP-15	1.39	Y	0.182322	0.182322	0.329304	0.329304	0.667829	0.667829	17.1985	17.1985	17.951	18	1	0	0	0	1	4	23	1	2	0	0	0	1	1	1	0	1
8131056	22-AUG-12	26-AUG-12	5.1	29-OCT-15	129	29-OCT-15	139	29-OCT-15	0.73	29-OCT-15	1.4	29-OCT-15	35	29-OCT-15	24	29-OCT-15	68	29-OCT-15	4.2	29-OCT-15	1.09	Y	0.336472	0.336472	0.0861777	0.0861777	1	-0.314711	18.2371	18.2371	16.8007	17
1236431	09-MAR-15	11-MAR-15	6.3	15-AUG-16	140	15-AUG-16	137	15-AUG-16	1.43	15-AUG-16	1.1	15-AUG-16	32	15-AUG-16	40	15-AUG-16	100	15-AUG-16	2.3	29-DEC-15	1.51		0.0953102	0.0953102	0.41211	0.41211	0.357674	0.357674	14.8288	14.8288	14.8288	15	1	0	0	0	1	4	15	2	4	1	0	0	1	1	1	1	1
1073815	18-JUN-09	20-JUN-09	6.5	20-JUN-09	73	20-JUN-09	133	20-JUN-09	0.66	20-JUN-09	1.2	20-JUN-09	83	20-JUN-09	30	20-JUN-09	109	20-JUN-09	3	20-JUN-09	1.10		0.182322	0.182322	0.0953102	0.0953102	1	-0.415515	17.7566	17.7566	20.6928	21
1044210	12-DEC-10	24-DEC-10	18.9	24-DEC-10	9999999	24-DEC-10	133	24-DEC-10	1.25	24-DEC-10	14.8	24-DEC-10	143	24-DEC-10	30	24-DEC-10	100	24-DEC-10	1.5	24-DEC-10	3.70	Y	2.69463	2.69463	1.30833	1.30833	0.223144	0.223144	33.4045	33.4045	34.2751	34
2003588	19-SEP-09	07-OCT-09	11.8	16-MAY-11	249	16-MAY-11	136	16-MAY-11	4.77	16-MAY-11	0.7	01-MAY-11	190	01-MAY-11	278	01-MAY-11	143	01-MAY-11	2	01-MAY-11	1.17	Y	1	-0.356675	0.157004	0.157004	1.56235	1.56235	26.9201	26.9201	27.3517	27
1782710	27-SEP-11	21-OCT-11	6.8	02-APR-12	88	02-APR-12	138	02-APR-12	2.44	02-APR-12	9.7	01-APR-12	64	29-MAR-12	32	29-MAR-12	84	29-MAR-12	1.3	29-MAR-12	1.37	Y	2.27213	2.27213	0.314811	0.314811	0.891998	0.891998	27.0809	27.0809	26.6546	27	1	0	1	1	1
2105688	02-MAY-12	11-MAY-12	11.9	08-NOV-12	209	08-NOV-12	142	08-NOV-12	4.04	08-NOV-12	9999999	08-NOV-12	32	08-NOV-12	27	08-NOV-12	184	08-NOV-12	3.3	08-NOV-12	1.09	Y	16.1181	16.1181	0.0861777	0.0861777	1.39624	1.39624	81.6837	40	40	40
2219453	19-JAN-13	21-JAN-13	9.4	21-JAN-13	39	21-JAN-13	135	21-JAN-13	1.23	21-JAN-13	6.1	21-JAN-13	30	21-JAN-13	23	21-JAN-13	91	21-JAN-13	2.3	21-JAN-13	1.24		1.80829	1.80829	0.215111	0.215111	0.207014	0.207014	17.6557	17.6557	19.1304	19	1	0	0	1	1	1	2	0	0	0	0	0	0	0	0	0
2015808	25-NOV-13	27-NOV-13	3.7	25-NOV-13	106	25-NOV-13	128	26-NOV-13	0.69	25-NOV-13	1.1	25-NOV-13	36	25-NOV-13	21	25-NOV-13	179	25-NOV-13	2	25-NOV-13	1.11	Y	0.0953102	0.0953102	0.10436	0.10436	1	-0.371064	17.5291	17.5291	24.203	24	1	0	0	0	1	2	3	0	1	0	0	0	1	1	1	0
1467036	20-AUG-13	01-SEP-13	38.8	14-MAY-14	9999999	14-MAY-14	132	14-MAY-14	1.59	14-MAY-14	0.6	12-MAY-14	44	12-MAY-14	32	12-MAY-14	790	12-MAY-14	1.2	12-MAY-14	1.13	Y	1	-0.510826	0.122218	0.122218	0.463734	0.463734	16.0168	16.0168	19.974	20
1851242	27-SEP-14	01-OCT-14	3.1	01-OCT-14	101	01-OCT-14	135	01-OCT-14	3.22	01-OCT-14	0.9	30-SEP-14	34	27-SEP-14	21	27-SEP-14	84	27-SEP-14	2.6	27-SEP-14	1.13	Y	1	-0.105361	0.122218	0.122218	1.16938	1.16938	22.7698	22.7698	23.907	24	5	1	1	1	1	20	99	12	6	0	1	0	1	1	1	0	1
0304947	09-NOV-15	12-NOV-15	3.2	19-NOV-15	30	19-NOV-15	128	20-NOV-15	0.66	20-NOV-15	4.7	19-NOV-15	77	19-NOV-15	60	19-NOV-15	249	19-NOV-15	2.5	19-NOV-15	1.39	Y	1.54756	1.54756	0.329304	0.329304	1	-0.415515	25.538	25.538	29.8332	30	1	1	0	1	1	7	38	2	6	0	0	0	1	1	1	0	1
1987507	31-MAY-09	02-JUN-09	8.2	02-JUN-09	170	02-JUN-09	136	02-JUN-09	0.54	02-JUN-09	25.4	02-JUN-09	183	02-JUN-09	80	02-JUN-09	304	02-JUN-09	1.9	02-JUN-09	1.45		3.23475	3.23475	0.371564	0.371564	1	-0.616186	32.3889	32.3889	32.64	33
1984020	21-MAY-09	06-JUN-09	32.8	06-JUN-09	9999999	06-JUN-09	124	06-JUN-09	4.14	06-JUN-09	15.1	06-JUN-09	210	06-JUN-09	78	06-JUN-09	153	06-JUN-09	1.6	06-JUN-09	5.02	Y	2.71469	2.71469	1.61343	1.61343	1.4207	1.4207	48.358	40	40	40
2077795	17-MAY-11	19-MAY-11	5.9	19-MAY-11	9999999	19-MAY-11	134	19-MAY-11	1.27	19-MAY-11	18.1	18-MAY-11	103	18-MAY-11	50	18-MAY-11	124	18-MAY-11	2.3	18-MAY-11	1.63	Y	2.89591	2.89591	0.48858	0.48858	0.239017	0.239017	25.136	25.136	26.6076	27
0686447	01-JAN-12	03-JAN-12	3.1	03-JAN-12		04-JAN-12	137	03-JAN-12	1.66	03-JAN-12	9999999	02-JAN-12	318	01-JAN-12	81	01-JAN-12	50	01-JAN-12	2	01-JAN-12	2.88	Y	16.1181	16.1181	1.05779	1.05779	0.506818	0.506818	84.0539	40	40	40
0882803	01-MAY-12	14-MAY-12	17.6	14-MAY-12	9999999	14-MAY-12	135	14-MAY-12	3.43	14-MAY-12	9999999	10-MAY-12	88	07-MAY-12	31	07-MAY-12	149	07-MAY-12	2.1	07-MAY-12	1.65	Y	16.1181	16.1181	0.500775	0.500775	1.23256	1.23256	84.7607	40	40	40
0333525	20-JUL-12	23-JUL-12	2.7	30-JUL-12	54	30-JUL-12	134	23-JUL-12	1.16	23-JUL-12	1.2	23-JUL-12	57	23-JUL-12	36	23-JUL-12	228	23-JUL-12	2.5	23-JUL-12	1.25	Y	0.182322	0.182322	0.223144	0.223144	0.14842	0.14842	11.0388	11.0388	13.9059	14
1801661	01-AUG-13	05-AUG-13	7.2	04-AUG-13	81	04-AUG-13	138	04-AUG-13	0.81	04-AUG-13	9999999	01-AUG-13	39	01-AUG-13	32	01-AUG-13	107	01-AUG-13	2.3	01-AUG-13	1.05		16.1181	16.1181	0.0487902	0.0487902	1	-0.210721	77.4729	40	40	40
0810976	28-OCT-13	30-OCT-13	4.6	26-JAN-14	110	26-JAN-14	137	26-JAN-14	0.75	26-JAN-14	2.6	26-JAN-14	68	26-JAN-14	44	26-JAN-14	117	26-JAN-14	3.2	26-JAN-14	1.13		0.955511	0.955511	0.122218	0.122218	1	-0.287682	20.9807	20.9807	20.9807	21	2	0	0	0	1	9	55	6	2	0	0	0	1	1	1	0	1
2228649	18-MAR-13	22-MAR-13	6.8	29-JUN-15	124	29-JUN-15	137	29-JUN-15	0.73	29-JUN-15	0.7	29-JUN-15	40	29-JUN-15	30	29-JUN-15	92	29-JUN-15	3.5	29-JUN-15	1.04		1	-0.356675	0.0392207	0.0392207	1	-0.314711	20.2193	20.2193	20.2193	20	2	1	0	0	0	1	4	0	0	0	0	0	0	1	1	0	1
7096498	01-AUG-15	18-AUG-15	12.4	18-AUG-15	77	18-AUG-15	132	18-AUG-15	0.69	18-AUG-15	8.9	18-AUG-15	90	18-AUG-15	52	18-AUG-15	81	18-AUG-15	1.9	18-AUG-15	2.15	Y	2.18605	2.18605	0.765468	0.765468	1	-0.371064	32.8365	32.8365	34.0185	34	1	1	0	0	0	1	17	0	0	0	0	0	1	0	0	0	1
7092267	08-AUG-15	25-AUG-15	8.7	19-AUG-15	69	19-AUG-15	140	22-AUG-15	1.75	22-AUG-15	11.3	19-AUG-15	16	19-AUG-15	7	19-AUG-15	68	19-AUG-15	3	19-AUG-15	1.42	Y	2.4248	2.4248	0.350657	0.350657	0.559616	0.559616	24.8786	24.8786	23.3816	23	1	0	0	0	0	2	22	1	0	0	0	0	0	0	1	0
1371017	22-NOV-12	28-NOV-12	4.4	06-SEP-15	74	06-SEP-15	151	06-SEP-15	1.53	06-SEP-15	2.1	04-SEP-15	26	04-SEP-15	17	04-SEP-15	76	04-SEP-15	2	04-SEP-15	1.77	Y	0.741937	0.741937	0.57098	0.57098	0.425268	0.425268	19.6993	19.6993	10.3204	10
1069715	14-AUG-12	17-AUG-12	10.4	16-JUN-16	9999999	16-JUN-16	135	16-JUN-16	10.68	16-JUN-16	0.9	14-JUN-16	26	14-JUN-16	19	14-JUN-16	132	14-JUN-16	2.6	01-DEC-15	1.00	Y	1	-0.105361	0	0	2.36837	2.36837	32.8753	32.8753	33.3456	33
7055337	12-FEB-15	14-FEB-15	6.2	16-MAY-16	150	16-MAY-16	140	16-MAY-16	0.89	16-MAY-16	0.6	16-MAY-16	29	16-MAY-16	24	16-MAY-16	66	16-MAY-16	3.7	06-OCT-15	1.12	Y	1	-0.510826	0.113329	0.113329	1	-0.116534	21.0493	21.0493	19.1732	19	1	0	0	0	1	2	5	0	0	0	0	0	0	0	1	0
0774944	19-AUG-14	21-AUG-14	1.7	15-AUG-16	25	15-AUG-16	140	15-AUG-16	64.56	15-AUG-16	1.5	15-AUG-16	24	15-AUG-16	20	15-AUG-16	47	15-AUG-16	3.6	09-DEC-15	1.18	Y	0.405465	0.405465	0.165514	0.165514	4.1676	4.1676	49.7003	40	40	40	4	1	0	0	0	21	81	6	6	0	0	0	1	1	1	0	1
1536308	03-AUG-11	08-AUG-11	11.5	08-AUG-11	378	08-AUG-11	133	08-AUG-11	0.66	08-AUG-11	1.4	08-AUG-11	76	08-AUG-11	19	08-AUG-11	135	08-AUG-11	1.9	08-AUG-11	1.38		0.336472	0.336472	0.322083	0.322083	1	-0.415515	20.8792	20.8792	23.4031	23
1383894	11-APR-12	13-APR-12	43.7	26-APR-12	115	26-APR-12	9999999	26-APR-12	92.8	26-APR-12	17.4	26-APR-12	1358	26-APR-12	772	26-APR-12	87	26-APR-12	1.7	26-APR-12	1.96	Y	2.85647	2.85647	0.672944	0.672944	4.53045	4.53045	68.1208	40	40	40
1952057	07-JUL-12	09-JUL-12	4.4	16-JUL-12	88	16-JUL-12	140	03-AUG-12	1.2	03-AUG-12	2.9	03-AUG-12	42	03-AUG-12	20	03-AUG-12	170	03-AUG-12	2.3	03-AUG-12	1.70	Y	1.06471	1.06471	0.530628	0.530628	0.182322	0.182322	18.1425	18.1425	15.9786	16
0240892	26-NOV-12	29-NOV-12	7.1	29-NOV-12	215	29-NOV-12	132	29-NOV-12	0.78	29-NOV-12	1.4	29-NOV-12	32	29-NOV-12	19	29-NOV-12	146	29-NOV-12	2.3	29-NOV-12	1.04	Y	0.336472	0.336472	0.0392207	0.0392207	1	-0.248461	17.7111	17.7111	21.3888	21
1279015	15-NOV-10	17-NOV-10	8.7	25-AUG-14	250	25-AUG-14	131	25-AUG-14	2.61	25-AUG-14	4.9	25-AUG-14	115	25-AUG-14	32	25-AUG-14	390	25-AUG-14	2.4	25-AUG-14	1.11	Y	1.58924	1.58924	0.10436	0.10436	0.95935	0.95935	22.7871	22.7871	26.1953	26
7035499	18-NOV-14	22-NOV-14	20.6	22-NOV-14	274	22-NOV-14	135	22-NOV-14	0.53	22-NOV-14	14.7	22-NOV-14	262	22-NOV-14	28	22-NOV-14	431	22-NOV-14	1.5	22-NOV-14	1.57	Y	2.68785	2.68785	0.451076	0.451076	1	-0.634878	31.2121	31.2121	31.7921	32	1	0	0	0	1	1	4	0	0	0	0	0	1	0	1	0
1152635	24-AUG-10	25-AUG-10	9	02-MAY-16	188	02-MAY-16	138	02-MAY-16	0.93	02-MAY-16	0.9	02-MAY-16	22	02-MAY-16	20	02-MAY-16	50	02-MAY-16	4.1	10-NOV-15	0.98	Y	1	-0.105361	-0.0202027	-0.0202027	1	-0.0725707	19.5537	19.5537	18.879	19	2	0	0	0	1	6	34	1	2	1	0	0	1	0	1	0
8112577	27-FEB-15	06-MAR-15	14.2	06-MAR-15	72	06-MAR-15	131	06-MAR-15	0.9	06-MAR-15	1.5	03-MAR-15	100	03-MAR-15	53	03-MAR-15	112	03-MAR-15	1.6	04-MAR-15	1.37	Y	0.405465	0.405465	0.314811	0.314811	1	-0.105361	21.0585	21.0585	24.8089	25	4	0	0	0	1	7	25	3	2	0	1	0	1	1	1	1
0157855	10-MAY-15	14-MAY-15	3.4	14-JUN-16	59	14-JUN-16	138	14-JUN-16	2.03	14-JUN-16	2.7	11-JUN-16	34	11-JUN-16	12	11-JUN-16	86	11-JUN-16	3.5	10-MAY-15	1.18	Y	0.993252	0.993252	0.165514	0.165514	0.708036	0.708036	18.8142	18.8142	18.115	18	4	1	0	1	1	9	76	2	2	0			1	1	1	0	1
0644011	03-DEC-11	07-DEC-11	2.8	03-MAY-15	101	03-MAY-15	135	03-MAY-15	0.55	03-MAY-15	1.7	03-MAY-15	104	03-MAY-15	19	03-MAY-15	160	03-MAY-15	2.3	03-MAY-15	1.43		0.530628	0.530628	0.357674	0.357674	1	-0.597837	22.0117	22.0117	23.199	23	3	0	0	0	0	2	3	0	0	0	0	0	0	0	1	0	1
0336729	16-FEB-15	28-FEB-15	3.1	22-JUL-16	30	22-JUL-16	142	22-JUL-16	1.26	22-JUL-16	21.8	22-JUL-16	45	22-JUL-16	21	22-JUL-16	42	22-JUL-16	2.1	23-MAY-15	1.63	Y	3.08191	3.08191	0.48858	0.48858	0.231112	0.231112	25.7635	25.7635	23.4144	23	2	1	0	0	1	6	94	2	3	0	1	0	1	1	1	0	1
1422473	29-JAN-10	31-JAN-10	11.7	09-MAR-16	22	09-MAR-16	134	09-MAR-16	3.54	09-MAR-16	6.7	09-MAR-16	270	09-MAR-16	108	09-MAR-16	63	09-MAR-16	2.5	18-NOV-15	1.15	Y	1.90211	1.90211	0.139762	0.139762	1.26413	1.26413	27.283	27.283	28.542	29	4	1	0	0	1	1	4	0	0	0	1	0	1	1	1	0	0
1535521	04-JUN-12	07-JUN-12	12.7	18-APR-16	152	18-APR-16	135	17-MAY-16	1.48	17-MAY-16	0.9	2016-03-03	95	30-MAR-16	62	30-MAR-16	167	30-MAR-16	2.6	14-DEC-15	0.94		1	-0.105361	-0.0618754	-0.0618754	0.392042	0.392042	13.2688	13.2688	15.0331	15	2	1	0	0	1	1	1	0	0	0	0	0	1	1	0	0	0
0609166	24-OCT-08	01-NOV-08	8	01-NOV-08	50	01-NOV-08	138	01-NOV-08	1.66	01-NOV-08	2.5	25-OCT-08	56	25-OCT-08	41	25-OCT-08	83	25-OCT-08	1.8	25-OCT-08	1.39	Y	0.916291	0.916291	0.329304	0.329304	0.506818	0.506818	18.432	18.432	17.7203	18
0998233	25-APR-09	19-MAY-09	10.9	19-MAY-09	287	19-MAY-09	136	19-MAY-09	0.53	19-MAY-09	9999999	06-MAY-09	45	02-MAY-09	21	02-MAY-09	149	02-MAY-09	2.8	02-MAY-09	1.05		16.1181	16.1181	0.0487902	0.0487902	1	-0.634878	77.4729	40	40	40
0929293	07-JAN-10	12-JAN-10	5.6	26-JUL-10	74	26-JUL-10	140	26-JUL-10	0.63	26-JUL-10	9999999	27-JUL-10	60	26-JUL-10	30	26-JUL-10	126	26-JUL-10	2.7	26-JUL-10	1.30		16.1181	16.1181	0.262364	0.262364	1	-0.462035	79.8649	40	40	40
0153308	08-JUL-12	10-JUL-12	7.4	17-OCT-12	9999999	17-OCT-12	140	17-OCT-12	46.8	17-OCT-12	9999999	14-OCT-12	16	10-OCT-12	13	10-OCT-12	125	10-OCT-12	2.6	10-OCT-12	2.10	Y	16.1181	16.1181	0.741937	0.741937	3.84588	3.84588	112.471	40	40	40
2196342	02-SEP-12	08-SEP-12	12.4	08-SEP-12	9999999	08-SEP-12	138	08-SEP-12	2.31	08-SEP-12	6.2	08-SEP-12	143	08-SEP-12	40	08-SEP-12	43	08-SEP-12	1.7	08-SEP-12	2.63	Y	1.82455	1.82455	0.966984	0.966984	0.837248	0.837248	32.1695	32.1695	31.9111	32
1879912	09-JUL-13	11-JUL-13	8.8	31-AUG-13	151	31-AUG-13	143	31-AUG-13	1.01	31-AUG-13	1.5	16-AUG-13	56	16-AUG-13	31	16-AUG-13	66	16-AUG-13	2.7	16-AUG-13	1.24		0.405465	0.405465	0.215111	0.215111	0.00995033	0.00995033	10.4671	10.4671	4.61962	5	4	1	0	1	1	3	16	1	2	0	0	0	1	0	0	0
1885981	11-MAY-10	14-MAY-10	6.8	12-AUG-15	202	12-AUG-15	141	12-AUG-15	0.77	12-AUG-15	9999999	15-JUN-15	23	01-MAY-14	16	01-MAY-14	57	01-MAY-14	3.4	01-MAY-14	0.98		16.1181	16.1181	-0.0202027	-0.0202027	1	-0.261365	76.7001	40	40	40
8438974	08-JUN-14	10-JUN-14	18.4	02-JUL-14	140	02-JUL-14	129	03-JUL-14	2.1	03-JUL-14	0.9	03-JUL-14	22	08-JUN-14	27	08-JUN-14	124	08-JUN-14	2.6	08-JUN-14	1.22		1	-0.105361	0.198851	0.198851	0.741937	0.741937	19.5375	19.5375	24.9396	25	1	1	1	1	1	3	7	1	0	0	0	0	0	0	1	0
0555638	31-MAY-14	10-JUN-14	7.6	15-AUG-14	119	15-AUG-14	140	15-AUG-14	0.88	15-AUG-14	2.2	02-JUN-14	94	02-JUN-14	61	02-JUN-14	140	02-JUN-14	2.7	02-JUN-14	1.14	Y	0.788457	0.788457	0.131028	0.131028	1	-0.127833	20.4479	20.4479	18.5122	19
7007594	05-JAN-15	13-JAN-15	8.9	24-APR-15	85	24-APR-15	139	24-APR-15	0.57	24-APR-15	9999999	14-APR-15	93	14-APR-15	61	14-APR-15	126	14-APR-15	2.3	14-APR-15	1.16	Y	16.1181	16.1181	0.14842	0.14842	1	-0.562119	78.5887	40	40	40
1204382	11-FEB-15	13-FEB-15	1.8	01-MAY-16	57	01-MAY-16	134	01-MAY-16	0.61	01-MAY-16	2	2018-02-09	44	18-APR-16	28	18-APR-16	160	18-APR-16	2.6	22-OCT-15	1.63	Y	0.693147	0.693147	0.48858	0.48858	1	-0.494296	24.0922	24.0922	25.6671	26	2	1	0	0	0	6	21	0	0	0	0	0	1	1	1	0	1
0480065	29-JUL-08	02-AUG-08	4.4	04-NOV-08	9999999	04-NOV-08	139	04-NOV-08	1.1	04-NOV-08	1	04-NOV-08	22	04-NOV-08	9	04-NOV-08	83	04-NOV-08	1.8	04-NOV-08	1.20	Y	0	0	0.182322	0.182322	0.0953102	0.0953102	9.38412	9.38412	7.36347	7
0420509	10-APR-09	13-APR-09	3.5	13-APR-09	45	13-APR-09	134	13-APR-09	1.18	13-APR-09	11	13-APR-09	126	13-APR-09	93	13-APR-09	109	13-APR-09	3.2	13-APR-09	2.01	Y	2.3979	2.3979	0.698135	0.698135	0.165514	0.165514	24.8971	24.8971	26.3923	26
1012231	05-OCT-09	06-OCT-09	6	05-OCT-09	140	05-OCT-09	138	05-OCT-09	1.48	05-OCT-09	9999999	05-OCT-09	37	05-OCT-09	20	05-OCT-09	110	05-OCT-09	2	05-OCT-09	1.06	Y	16.1181	16.1181	0.0582689	0.0582689	0.392042	0.392042	71.7609	40	40	40
2001891	01-JAN-10	04-JAN-10	12.7	08-JAN-10	165	08-JAN-10	132	08-JAN-10	3.98	08-JAN-10	20	08-JAN-10	121	08-JAN-10	92	08-JAN-10	199	08-JAN-10	4.4	08-JAN-10	1.97	Y	2.99573	2.99573	0.678034	0.678034	1.38128	1.38128	38.5667	38.5667	38.8032	39
1790826	10-NOV-10	24-NOV-10	5.9	24-NOV-10	9999999	24-NOV-10	131	24-NOV-10	5.2	24-NOV-10	9999999	18-NOV-10	49	11-NOV-10	23	11-NOV-10	155	11-NOV-10	3	22-NOV-10	1.41	Y	16.1181	16.1181	0.34359	0.34359	1.64866	1.64866	86.9823	40	40	40
0231396	05-MAR-11	08-MAR-11	8.3	11-MAY-11	84	11-MAY-11	130	11-MAY-11	1.63	11-MAY-11	9999999	11-MAY-11	35	11-MAY-11	19	11-MAY-11	68	11-MAY-11	1.7	11-MAY-11	1.26	Y	16.1181	16.1181	0.231112	0.231112	0.48858	0.48858	74.6206	40	40	40
0715273	13-JUN-11	16-JUN-11	7.1	11-OCT-14	9999999	11-OCT-14	134	07-MAR-15	0.7	07-MAR-15	2.9	07-MAR-15	67	07-MAR-15	43	07-MAR-15	100	07-MAR-15	2.5	07-MAR-15	1.32		1.06471	1.06471	0.277632	0.277632	1	-0.356675	23.1341	23.1341	24.8038	25
1545445	25-JAN-12	27-JAN-12	0.6	18-FEB-12	9999999	18-FEB-12	144	18-FEB-12	1.84	18-FEB-12	9999999	12-FEB-12	15	11-FEB-12	8	11-FEB-12	43	11-FEB-12	2.9	11-FEB-12	1.22	Y	16.1181	16.1181	0.198851	0.198851	0.609766	0.609766	75.419	40	40	40
2032648	27-FEB-13	04-MAR-13	6.6	16-AUG-13	137	16-AUG-13	137	17-AUG-13	2.46	17-AUG-13	0.6	09-AUG-13	16	09-AUG-13	9	09-AUG-13	40	09-AUG-13	2.9	09-AUG-13	0.96	Y	1	-0.510826	-0.040822	-0.040822	0.900161	0.900161	18.3673	18.3673	18.3673	18
1836825	03-SEP-13	10-SEP-13	6	23-SEP-13	61	23-SEP-13	132	23-SEP-13	5.92	23-SEP-13	2	23-SEP-13	47	23-SEP-13	23	23-SEP-13	93	23-SEP-13	1.9	23-SEP-13	1.54	Y	0.693147	0.693147	0.431782	0.431782	1.77834	1.77834	30.9047	30.9047	32.4055	32	3	0	1	1	1	4	33	2	0	0	0	0	1	1	1	0	1
2283349	26-NOV-13	08-DEC-13	5.9	04-DEC-13	361	04-DEC-13	134	08-DEC-13	0.55	08-DEC-13	0.5	04-DEC-13	54	04-DEC-13	22	04-DEC-13	77	04-DEC-13	1.7	04-DEC-13	1.21		1	-0.693147	0.19062	0.19062	1	-0.597837	21.9149	21.9149	23.7054	24
2297220	02-MAR-14	05-MAR-14	3.6	05-MAR-14	139	05-MAR-14	136	04-MAR-14	0.73	04-MAR-14	2.7	05-MAR-14	80	05-MAR-14	63	05-MAR-14	242	05-MAR-14	2.1	05-MAR-14	1.39	Y	0.993252	0.993252	0.329304	0.329304	1	-0.314711	23.4427	23.4427	23.9891	24
2137181	01-JUL-14	05-JUL-14	7.4	22-JUL-14	195	22-JUL-14	129	12-AUG-14	1.67	12-AUG-14	1.6	05-AUG-14	69	05-AUG-14	36	05-AUG-14	162	05-AUG-14	2.7	05-AUG-14	1.09		0.470004	0.470004	0.0861777	0.0861777	0.512824	0.512824	14.0795	14.0795	20.9225	21	1	1	1	0	0	2	6	0	1	0	0	0	0	0	1	0
2196953	09-JUL-15	10-JUL-15	4.2	30-OCT-15	97	30-OCT-15	130	30-OCT-15	1.08	30-OCT-15	3.1	30-OCT-15	57	30-OCT-15	26	30-OCT-15	177	30-OCT-15	3.3	30-OCT-15	1.32		1.1314	1.1314	0.277632	0.277632	0.076961	0.076961	14.5527	14.5527	20.431	20
1111115	24-NOV-15	01-DEC-15	34.1	01-DEC-15	9999999	01-DEC-15	145	01-DEC-15	2.09	01-DEC-15	0.9	01-DEC-15	41	01-DEC-15	14	01-DEC-15	77	01-DEC-15	2.1	01-DEC-15	1.13		1	-0.105361	0.122218	0.122218	0.737164	0.737164	18.6335	18.6335	12.9927	13
7092789	17-JUL-15	23-JUL-15	2	21-JUL-16	61	21-JUL-16	136	21-JUL-16	0.91	21-JUL-16	1.1	21-JUL-16	65	21-JUL-16	73	21-JUL-16	137	21-JUL-16	3.7	12-AUG-15	1.11	Y	0.0953102	0.0953102	0.10436	0.10436	1	-0.0943107	17.5291	17.5291	18.2706	18	1	1	1	0	1	1	6	0	0	0	0	0	0	1	1	0	1
1571228	05-JUN-12	08-JUN-12	7.8	05-APR-16	228	05-APR-16	142	19-AUG-16	1	19-AUG-16	0.3	05-APR-16	30	05-APR-16	22	05-APR-16	111	05-APR-16	3.8	01-DEC-15	0.96	Y	1	-1.20397	-0.040822	-0.040822	0	0	9.75279	9.75279	4.762	5	1	0	0	1	1	1	2	0	0	0	0	0	0	0	1	0
1996761	23-AUG-09	26-AUG-09	3.4	04-AUG-16	239	04-AUG-16	137	04-AUG-16	32	04-AUG-16	0.7	04-AUG-16	22	04-AUG-16	27	04-AUG-16	40	04-AUG-16	4.2	21-DEC-15		Y	1	-0.356675	1	#NUM!	3.46574	3.46574	54.5771	40	40	40
0869444	19-SEP-15	22-SEP-15	4.9	28-JUL-16	102	28-JUL-16	134	28-JUL-16	0.91	28-JUL-16	9999999	28-JUL-16	50	28-JUL-16	24	28-JUL-16	121	28-JUL-16	1.5	21-DEC-15	1.56	Y	16.1181	16.1181	0.444686	0.444686	1	-0.0943107	81.9069	40	40	40
2285857	15-DEC-13	17-DEC-13	3	17-DEC-13	45	17-DEC-13	132	17-DEC-13	0.61	17-DEC-13	1.4	15-DEC-13	45	15-DEC-13	28	15-DEC-13	127	15-DEC-13	2.6	15-DEC-13			0.336472	0.336472	1	#NUM!	1	-0.494296	28.4719	28.4719	30.374	30	3	1	0	0	1	1	2	0	0	0	0	0	0	0	1	0
1867865	27-MAY-10	10-JUN-10	2.3	23-AUG-10	136	23-AUG-10	137	23-AUG-10	1.43	23-AUG-10	1.9	23-AUG-10	26	23-AUG-10	19	23-AUG-10	517	23-AUG-10	2.5	23-AUG-10	1.3	Y	0.641854	0.641854	0.262364	0.262364	0.357674	0.357674	15.2176	15.2176	15.2176	15
0561261	11-DEC-10	12-DEC-10	60	12-DEC-10	9999999	12-DEC-10	141	12-DEC-10	2.35	12-DEC-10	9999999	11-DEC-10	40	11-DEC-10	22	11-DEC-10	79	11-DEC-10	2.4	11-DEC-10	1.27	Y	16.1181	16.1181	0.239017	0.239017	0.854415	0.854415	78.2101	40	40	40
1679051	28-FEB-11	04-MAR-11	10.1	04-MAR-11	9999999	04-MAR-11	132	04-MAR-11	0.59	04-MAR-11	5.7	04-MAR-11	53	04-MAR-11	52	04-MAR-11	205	04-MAR-11	1.6	04-MAR-11	1.49	Y	1.74047	1.74047	0.398776	0.398776	1	-0.527633	27.0453	27.0453	29.1828	29
2020572	24-DEC-12	03-JAN-13	35	03-JAN-13	9999999	03-JAN-13	152	03-JAN-13	5.3	03-JAN-13	17.6	03-JAN-13	45	03-JAN-13	20	03-JAN-13	106	03-JAN-13	2.6	03-JAN-13	2.91	Y	2.8679	2.8679	1.06815	1.06815	1.66771	1.66771	45.1939	40	40	40
1124730	08-JAN-13	10-JAN-13	9.4	15-AUG-16	323	15-AUG-16	133	15-AUG-16	11.6	15-AUG-16	9999999	11-MAR-14	26	11-MAR-14	47	11-MAR-14	67	11-MAR-14	3.5	11-MAR-14	1.03	Y	16.1181	16.1181	0.0295588	0.0295588	2.45101	2.45101	91.1436	40	40	40
2234413	26-APR-13	02-MAY-13	4.8	01-MAY-13	136	2013-04-30	138	01-MAY-13	0.65	01-MAY-13	0.5	01-MAY-13	81	01-MAY-13	53	01-MAY-13	95	01-MAY-13	2.8	01-MAY-13	1.07		1	-0.693147	0.0676586	0.0676586	1	-0.430783	20.5378	20.5378	19.8955	20	1	0	1	0	1	1	6	0	0	0	0	0	0	0	0	0
1240124	04-JUN-13	23-JUN-13	3.9	22-JUN-13	52	22-JUN-13	136	23-JUN-13	0.68	23-JUN-13	9.3	22-JUN-13	49	22-JUN-13	21	22-JUN-13	54	22-JUN-13	3	22-JUN-13	1.80	Y	2.23001	2.23001	0.587787	0.587787	1	-0.385662	31.0127	31.0127	31.3092	31	2	1	0	0	0	2	28	1	0	0			1	1	1	0	1
1202508	13-MAR-14	15-MAR-14	8.3	27-MAR-14	80	27-MAR-14	127	27-MAR-14	11.14	27-MAR-14	1.6	27-MAR-14	175	27-MAR-14	82	27-MAR-14	453	27-MAR-14	1.6	27-MAR-14	1.29	Y	0.470004	0.470004	0.254642	0.254642	2.41054	2.41054	34.1275	34.1275	36.0654	36	3
1544533	06-JAN-15	10-JAN-15	5.8	16-MAY-16	237	16-MAY-16	139	23-JUN-16	1.06	23-JUN-16	0.9	23-JUN-16	31	23-JUN-16	18	23-JUN-16	78	23-JUN-16	3.6	08-SEP-15	1.17		1	-0.105361	0.157004	0.157004	0.0582689	0.0582689	12.5261	12.5261	10.7128	11	1	0	0	1	0	3	10	1	0	0	0	0	0	0	0	0
1287932	08-OCT-13	11-OCT-13	5.7	17-MAR-15	189	17-MAR-15	136	17-MAR-15	0.92	17-MAR-15	1.3	14-JAN-15	56	14-JAN-15	33	14-JAN-15	73	14-JAN-15	3.5	14-JAN-15	1.09		0.262364	0.262364	0.0861777	0.0861777	1	-0.0833816	17.9569	17.9569	18.6843	19
1419694	23-APR-13	25-APR-13	7.9	23-MAY-16	228	23-MAY-16	134	23-MAY-16	0.89	23-MAY-16	0.7	2015-08-21	40	21-AUG-15	23	21-AUG-15	80	21-AUG-15	3.5	21-AUG-15	1.08	Y	1	-0.356675	0.076961	0.076961	1	-0.116534	20.642	20.642	22.5584	23	1	1	0	1	1	4	10	0	1	0	0	0	1	0	0	0
1802356	18-NOV-13	26-NOV-13	6	18-AUG-16	131	18-AUG-16	139	18-AUG-16	0.94	18-AUG-16	1.4	18-AUG-16	33	18-AUG-16	38	18-AUG-16	100	18-AUG-16	4	09-AUG-15	1.24	Y	0.336472	0.336472	0.215111	0.215111	1	-0.0618754	19.6811	19.6811	18.3401	18	1	1	0	0	0	3	18	1	0	0	0	0	0	0	0	0
1320725	26-OCT-15	29-OCT-15	3.2	18-AUG-16	40	18-AUG-16	139	18-AUG-16	0.72	18-AUG-16	2.5	18-AUG-16	54	18-AUG-16	33	18-AUG-16	160	18-AUG-16	2.7	30-DEC-15	1.24	Y	0.916291	0.916291	0.215111	0.215111	1	-0.328504	21.8728	21.8728	20.6764	21
1939525	11-SEP-08	15-SEP-08	8.3	15-SEP-08	280	15-SEP-08	130	15-SEP-08	1.46	15-SEP-08	2.1	11-SEP-08	103	11-SEP-08	123	11-SEP-08	825	11-SEP-08	1.3	11-SEP-08	1.75	Y	0.741937	0.741937	0.559616	0.559616	0.378436	0.378436	19.1239	19.1239	23.9462	24
0686453	17-DEC-08	23-DEC-08	14.7	22-DEC-08	73	22-DEC-08	131	22-DEC-08	0.75	22-DEC-08	2.4	19-DEC-08	48	19-DEC-08	47	19-DEC-08	153	19-DEC-08	1.9	19-DEC-08	2.12		0.875469	0.875469	0.751416	0.751416	1	-0.287682	27.7251	27.7251	30.1556	30
1531597	13-JAN-09	17-JAN-09	17	17-JAN-09	9999999	17-JAN-09	128	17-JAN-09	1.18	17-JAN-09	9999999	16-JAN-09	45	16-JAN-09	32	16-JAN-09	249	16-JAN-09	0.8	16-JAN-09	1.39	Y	16.1181	16.1181	0.329304	0.329304	0.165514	0.165514	72.6286	40	40	40
1859050	31-MAR-09	03-APR-09	3	03-APR-09	38	03-APR-09	136	03-APR-09	1.07	03-APR-09	2.9	31-MAR-09	85	31-MAR-09	56	31-MAR-09	127	31-MAR-09	2.8	31-MAR-09	1.19	Y	1.06471	1.06471	0.173953	0.173953	0.0676586	0.0676586	13.0504	13.0504	13.9397	14
1081485	24-JUL-09	26-JUL-09	3.3	06-AUG-09	60	06-AUG-09	125	06-AUG-09	1.92	06-AUG-09	6.6	06-AUG-09	153	06-AUG-09	71	06-AUG-09	126	06-AUG-09	1.8	06-AUG-09	2.16		1.88707	1.88707	0.770108	0.770108	0.652325	0.652325	28.4311	28.4311	33.0124	33
2053251	28-SEP-10	09-OCT-10	8.2	05-OCT-10	9999999	05-OCT-10	135	05-OCT-10	7.31	05-OCT-10	2.4	05-OCT-10	31	05-OCT-10	16	05-OCT-10	31	05-OCT-10	2.6	05-OCT-10	1.96	Y	0.875469	0.875469	0.672944	0.672944	1.98924	1.98924	36.3133	36.3133	36.5566	37
1339742	12-FEB-11	15-FEB-11	12.1	07-MAR-11	9999999	07-MAR-11	134	07-MAR-11	1.47	07-MAR-11	1.5	07-MAR-11	74	07-MAR-11	40	07-MAR-11	754	07-MAR-11	2	07-MAR-11	1.42	Y	0.405465	0.405465	0.350657	0.350657	0.385262	0.385262	15.577	15.577	17.9949	18
0776314	06-DEC-10	14-DEC-10	4.3	01-MAR-11	9999999	01-MAR-11	134	01-MAR-11	0.84	01-MAR-11	9999999	25-FEB-11	68	24-FEB-11	38	24-FEB-11	238	24-FEB-11	9999999	24-FEB-11	1.65		16.1181	16.1181	0.500775	0.500775	1	-0.174353	82.5351	40	40	40
0709575	24-SEP-11	29-SEP-11	2.1	29-SEP-11	9999999	29-SEP-11	137	29-SEP-11	0.71	29-SEP-11	1.7	29-SEP-11	32	29-SEP-11	16	29-SEP-11	61	29-SEP-11	2.5	29-SEP-11	1.39	Y	0.530628	0.530628	0.329304	0.329304	1	-0.34249	21.694	21.694	21.694	22
0924544	18-APR-13	19-APR-13	1.5	16-APR-13	20	16-APR-13	143	16-APR-13	4.1	16-APR-13	2.6	16-APR-13	64	16-APR-13	28	16-APR-13	51	16-APR-13	3.5	16-APR-13	1.59	Y	0.955511	0.955511	0.463734	0.463734	1.41099	1.41099	28.7388	28.7388	26.5091	27	1	0	0	0	1	4	49	3	0	0	1	0	1	1	1	0	1
0727122	28-DEC-13	17-JAN-14	9.6	16-JAN-14	31	16-JAN-14	134	16-JAN-14	0.34	16-JAN-14	8.2	15-JAN-14	59	15-JAN-14	53	15-JAN-14	132	15-JAN-14	1.4	15-JAN-14	2.23	Y	2.10413	2.10413	0.802002	0.802002	1	-1.07881	32.936	32.936	33.6354	34	2	0	0	0	0	5	31	1	2	0	0	0	1	0	1	0
0190757	24-MAY-14	09-JUN-14	6.2	24-JUN-14	81	24-JUN-14	137	24-JUN-14	4.59	24-JUN-14	3.6	24-JUN-14	31	24-JUN-14	19	24-JUN-14	85	24-JUN-14	1.9	24-JUN-14	1.34	Y	1.28093	1.28093	0.29267	0.29267	1.52388	1.52388	29.1334	29.1334	29.1334	29	2	0	0	0		2	23	1	0	0	1	0	1		1	0
7032664	05-NOV-14	08-NOV-14	20.7	08-NOV-14	50	09-NOV-14	138	07-NOV-14	1.16	07-NOV-14	19.1	06-NOV-14	101	05-NOV-14	32	05-NOV-14	206	05-NOV-14	1.5	05-NOV-14	1.44	Y	2.94969	2.94969	0.364643	0.364643	0.14842	0.14842	23.0842	23.0842	22.526	23	1	0	0	0	0	1	3	0	0	0	1	0	0	1	1	0	1
8070183	05-NOV-14	20-NOV-14	15.4	20-NOV-14	179	20-NOV-14	134	13-NOV-14	3.14	13-NOV-14	2.3	13-NOV-14	27	13-NOV-14	16	13-NOV-14	71	13-NOV-14	3.1	13-NOV-14	1.51	Y	0.832909	0.832909	0.41211	0.41211	1.14422	1.14422	25.1442	25.1442	26.615	27	1	0	0	0	1	3	26	0	2	0	1	0	0	0	1	0
1121726	07-OCT-14	24-OCT-14	5.1	19-MAY-15	136	19-MAY-15	135	19-MAY-15	0.71	19-MAY-15	1.4	15-MAY-15	82	15-MAY-15	46	15-MAY-15	85	15-MAY-15	2.5	15-MAY-15	1.47	Y	0.336472	0.336472	0.385262	0.385262	1	-0.34249	21.5868	21.5868	22.8021	23	1	0	0	0	1	9	48	3	2	0	0	0	1	1	1	0	1
0527348	21-MAY-15	23-MAY-15	6.2	22-JUL-15	149	22-JUL-15	132	22-JUL-15	1.16	22-JUL-15	1.4	22-JUL-15	146	22-JUL-15	46	22-JUL-15	169	22-JUL-15	3	22-JUL-15	1.11	Y	0.336472	0.336472	0.10436	0.10436	0.14842	0.14842	10.2911	10.2911	15.193	15	1	0	1	0	1	4	37	0	2	0	0	0	1	1	1	0
1414874	18-NOV-15	20-NOV-15	6.4	02-JUN-16	59	2017-03-01	136	02-JUN-16	1.91	02-JUN-16	4.7	2017-03-01	159	02-JUN-16	74	02-JUN-16	139	02-JUN-16	2.3	19-NOV-15	1.21	Y	1.54756	1.54756	0.19062	0.19062	0.647103	0.647103	20.6075	20.6075	21.2475	21	1	1	0	0	1	14	105	3	3	0	0	1	1	1	1	0
0713551	09-SEP-15	17-SEP-15	8.2	11-APR-16	160	11-APR-16	134	11-APR-16	0.8	11-APR-16	1.3	29-MAR-16	25	29-MAR-16	16	29-MAR-16	84	29-MAR-16	2.5	19-DEC-15	1.16	Y	0.262364	0.262364	0.14842	0.14842	1	-0.223144	18.654	18.654	20.7673	21	1	0	1	0	1	9	75	1	5	0	0	0	1	1	1	0	0
1929057	24-OCT-08	04-NOV-08	4.8	04-NOV-08	52	04-NOV-08	142	01-NOV-08	0.81	01-NOV-08	5.3	01-NOV-08	31	01-NOV-08	25	01-NOV-08	64	01-NOV-08	2.8	01-NOV-08	1.83	Y	1.66771	1.66771	0.604316	0.604316	1	-0.210721	29.0723	29.0723	27.2692	27
1837775	02-MAR-09	05-MAR-09	1.7	05-MAR-09	9999999	05-MAR-09	133	05-MAR-09	0.67	05-MAR-09	1.2	05-MAR-09	34	05-MAR-09	21	05-MAR-09	84	05-MAR-09	2.2	05-MAR-09	1.41	Y	0.182322	0.182322	0.34359	0.34359	1	-0.400478	20.5374	20.5374	23.1064	23
1175034	20-SEP-09	22-SEP-09	2	22-SEP-09	9999999	22-SEP-09	139	22-SEP-09	0.81	22-SEP-09	9999999	20-SEP-09	68	20-SEP-09	25	20-SEP-09	149	20-SEP-09	3.1	20-SEP-09	1.25	Y	16.1181	16.1181	0.223144	0.223144	1	-0.210721	79.4256	40	40	40
8006671	05-MAR-13	21-MAR-13	6.3	11-MAY-13	91	11-MAY-13	134	11-MAY-13	2.96	11-MAY-13	1	30-APR-13	17	30-APR-13	8	30-APR-13	235	30-APR-13	1.9	02-MAY-13	1.35	Y	0	0	0.300105	0.300105	1.08519	1.08519	20.1764	20.1764	22.139	22	4	1	1	0	0	3	27	0	2	0	0	0	1	0	1	0	0
1556250	08-AUG-13	10-AUG-13	5	10-AUG-13	160	10-AUG-13	137	10-AUG-13	1.06	10-AUG-13	1.9	09-AUG-13	100	09-AUG-13	125	09-AUG-13	320	09-AUG-13	2.6	09-AUG-13	1.04		0.641854	0.641854	0.0392207	0.0392207	0.0582689	0.0582689	9.85311	9.85311	9.85311	10	1	1	0	0	0	1	2	0	0	1	0	0	0	0	0	0
1835959	02-JUL-13	04-JUL-13	5.9	22-FEB-14	89	22-FEB-14	135	22-FEB-14	0.75	22-FEB-14	1.5	2013-07-03	60	03-JUL-13	42	03-JUL-13	57	03-JUL-13	3.1	03-JUL-13	1.27		0.405465	0.405465	0.239017	0.239017	1	-0.287682	20.2096	20.2096	21.5158	22	1	0	0	0	1	1	2	0	0	0	0	0	1	1	1	0	0
1273674	15-APR-14	21-APR-14	3.9	20-AUG-14	138	20-AUG-14	138	20-AUG-14	0.6	20-AUG-14	0.5	20-AUG-14	41	20-AUG-14	28	20-AUG-14	91	20-AUG-14	2.8	20-AUG-14	1.02	Y	1	-0.693147	0.0198026	0.0198026	1	-0.510826	20.0018	20.0018	19.3418	19	1	0	0	0	1	1	6	0	0	0	0	0	1		1	0
1473769	17-MAR-14	26-MAR-14	7.6	20-MAR-14	128	20-MAR-14	130	20-MAR-14	0.53	20-MAR-14	1.7	18-MAR-14	140	17-MAR-14	30	17-MAR-14	173	17-MAR-14	2.5	17-MAR-14	1.34	Y	0.530628	0.530628	0.29267	0.29267	1	-0.634878	21.2837	21.2837	25.6071	26	2	0	0	0	1	2	15	0	0	0	0	0	0	0	1	0
1469809	22-FEB-13	27-FEB-13	8.2	06-JUN-16	185	06-JUN-16	140	06-JUN-16	1.34	06-JUN-16	0.8	06-JUN-16	32	06-JUN-16	25	06-JUN-16	61	06-JUN-16	4.1	12-NOV-15	1.14	Y	1	-0.223144	0.131028	0.131028	0.29267	0.29267	14.4784	14.4784	11.9517	12	1	0	1	0	0	2	6	1	0	0	0	0	0	0	0	0
7004541	12-AUG-14	19-AUG-14	10.4	19-AUG-14	218	19-AUG-14	136	19-AUG-14	0.65	19-AUG-14	1.8	12-AUG-14	54	12-AUG-14	36	12-AUG-14	135	12-AUG-14	2.3	12-AUG-14	1.22		0.587787	0.587787	0.198851	0.198851	1	-0.430783	20.449	20.449	21.0941	21	1	0	0	0	1	2	12	1	0	0	0	0	1	1	1	0	1
0139233	13-JUN-08	19-JUN-08	7.2	27-AUG-14	225	27-AUG-14	141	27-AUG-14	6.31	27-AUG-14	0.9	25-AUG-14	45	25-AUG-14	19	25-AUG-14	102	25-AUG-14	3.2	25-AUG-14	1.20	Y	1	-0.105361	0.182322	0.182322	1.84214	1.84214	29.8812	29.8812	28.5456	29	3	1	1	0	1	2	8	0	0	0	0	0	0
1704363	21-OCT-11	22-OCT-11	4.7	28-NOV-14	46	28-NOV-14	134	28-NOV-14	1.92	28-NOV-14	4.9	01-DEC-14	133	01-DEC-14	71	01-DEC-14	97	01-DEC-14	2.3	01-DEC-14	1.55	Y	1.58924	1.58924	0.438255	0.438255	0.652325	0.652325	23.5885	23.5885	25.2133	25	1	0	0	0	1	1	4	0	0	0	0	0	1	0	1	1
8226322	18-DEC-14	28-DEC-14	3.5	11-DEC-15	120	11-DEC-15	136	11-DEC-15	0.63	11-DEC-15	0.9	20-APR-16	72	20-APR-16	28	20-APR-16	142	20-APR-16	3.8	11-DEC-15	1.03	Y	1	-0.105361	0.0295588	0.0295588	1	-0.462035	20.1111	20.1111	20.7674	21	1	0	0	1	1	8	61	1	5	0	0	0	1	1	1	0	1
1868444	16-SEP-14	21-SEP-14	2.4	20-NOV-15	85	20-NOV-15	141	13-OCT-15	0.56	13-OCT-15	2.7	13-OCT-15	50	13-OCT-15	37	13-OCT-15	77	13-OCT-15	3.6	13-OCT-15	1.30	Y	0.993252	0.993252	0.262364	0.262364	1	-0.579818	22.693	22.693	20.4084	20	4	0	0	0	0	2	8	0	0	0	0	0	1	1	1	0	1
1446834	11-JUL-11	16-JUL-11	4.2	03-AUG-16	46	03-AUG-16	135	03-AUG-16	0.94	03-AUG-16	1	03-AUG-16	27	03-AUG-16	15	03-AUG-16	64	03-AUG-16	4.1	29-OCT-15	1.36	Y	0	0	0.307485	0.307485	1	-0.0618754	19.4438	19.4438	20.8005	21
1941431	03-JUN-15	06-JUN-15	5	06-JAN-16	51	06-JAN-16	137	06-JAN-16	1.27	06-JAN-16	5.8	06-JAN-16	105	06-JAN-16	33	06-JAN-16	50	06-JAN-16	2	26-DEC-15	1.82	Y	1.75786	1.75786	0.598837	0.598837	0.239017	0.239017	22.0691	22.0691	22.0691	22	2	1	0	0	1	7	35	4	0	1	1	0	1	1	1	0
0416172	10-JAN-08	11-JAN-08	5.2	19-FEB-08	103	19-FEB-08	143	19-FEB-08	0.7	19-FEB-08	9999999	19-FEB-08	76	19-FEB-08	57	19-FEB-08	194	19-FEB-08	2.6	19-FEB-08	1.51	Y	16.1181	16.1181	0.41211	0.41211	1	-0.356675	81.542	40	40	40
1774603	31-MAR-09	03-APR-09	9.3	03-APR-09	9999999	03-APR-09	138	03-APR-09	3.58	03-APR-09	9.4	03-APR-09	222	03-APR-09	69	03-APR-09	165	03-APR-09	1.6	03-APR-09	> 16.90	Y	2.24071	2.24071	#VALUE!	#VALUE!	1.27536	1.27536	#VALUE!	#VALUE!	#VALUE!	#VALUE!
2032543	30-APR-10	07-MAY-10	7	07-MAY-10	97	07-MAY-10	128	07-MAY-10	0.86	07-MAY-10	1.5	07-MAY-10	91	07-MAY-10	56	07-MAY-10	270	07-MAY-10	2.4	07-MAY-10	1.11		0.405465	0.405465	0.10436	0.10436	1	-0.150823	18.7015	18.7015	25.0271	25
2039644	24-AUG-10	25-AUG-10	12.6	25-AUG-10	170	25-AUG-10	127	25-AUG-10	2.98	25-AUG-10	9999999	24-AUG-10	164	24-AUG-10	33	24-AUG-10	245	24-AUG-10	1.4	24-AUG-10	2.17		16.1181	16.1181	0.774727	0.774727	1.09192	1.09192	86.4831	40	40	40
1375616	05-NOV-10	16-NOV-10	8.5	16-FEB-11	117	16-FEB-11	132	16-FEB-11	1.01	16-FEB-11	2.3	16-FEB-11	59	16-FEB-11	31	16-FEB-11	271	16-FEB-11	3.1	16-FEB-11	1.43	Y	0.832909	0.832909	0.357674	0.357674	0.00995033	0.00995033	13.6796	13.6796	18.0224	18
2091607	26-AUG-11	28-AUG-11	3.9	27-OCT-11	55	27-OCT-11	133	27-OCT-11	0.9	27-OCT-11	1.2	27-OCT-11	69	27-OCT-11	53	27-OCT-11	150	27-OCT-11	2.5	27-OCT-11	1.33		0.182322	0.182322	0.285179	0.285179	1	-0.105361	19.8832	19.8832	22.5386	23
0306118	09-DEC-10	18-DEC-10	10	06-FEB-12	52	06-FEB-12	139	06-FEB-12	1.21	06-FEB-12	3.5	06-FEB-12	29	06-FEB-12	15	06-FEB-12	90	06-FEB-12	2.4	06-FEB-12	1.48	Y	1.25276	1.25276	0.392042	0.392042	0.19062	0.19062	17.3806	17.3806	15.8877	16
1640066	07-AUG-12	11-AUG-12	9	26-SEP-12	68	26-SEP-12	120	26-SEP-12	1.62	26-SEP-12	3.7	08-AUG-12	55	08-AUG-12	36	08-AUG-12	70	08-AUG-12	2.4	08-AUG-12	2.09		1.30833	1.30833	0.737164	0.737164	0.482426	0.482426	24.2486	24.2486	33.0851	33
2204778	11-OCT-12	20-OCT-12	28.7	18-OCT-12	9999999	18-OCT-12	133	18-OCT-12	3.59	18-OCT-12	25.4	18-OCT-12	161	18-OCT-12	95	18-OCT-12	226	18-OCT-12	3.6	18-OCT-12	2.73	Y	3.23475	3.23475	1.0043	1.0043	1.27815	1.27815	42.1374	40	40	40
2235840	16-MAY-13	22-MAY-13	3.5	22-MAY-13	75	22-MAY-13	130	22-MAY-13	0.99	22-MAY-13	11.5	22-MAY-13	112	22-MAY-13	79	22-MAY-13	170	22-MAY-13	2.4	22-MAY-13	2.07		2.44235	2.44235	0.727549	0.727549	1	-0.0100503	33.3806	33.3806	34.9097	35	2	0	0	0	1	1	6	0	0	0	0	0	1	0	1	0
1863767	05-APR-13	10-APR-13	8.9	04-OCT-13	263	04-OCT-13	134	04-OCT-13	0.64	04-OCT-13	0.6	03-OCT-13	40	03-OCT-13	12	03-OCT-13	68	03-OCT-13	2.8	03-OCT-13	1.85		1	-0.510826	0.615186	0.615186	1	-0.446287	26.6701	26.6701	27.9897	28	2	0	0	0	0	2	16	0	0	0	0	0	0		1	0	1
2066939	30-MAR-11	03-APR-11	6.7	21-MAR-16	142	21-MAR-16	131	21-MAR-16	1.44	21-MAR-16	0.8	21-MAR-16	73	21-MAR-16	50	21-MAR-16	75	21-MAR-16	3.2	24-JUL-14	0.97	Y	1	-0.223144	-0.0304592	-0.0304592	0.364643	0.364643	13.3585	13.3585	18.6335	19	2	1	0	0	1	3	14	0	0	0	0	0	0	1	1	1	1
0438041	29-OCT-13	07-NOV-13	6.8	20-OCT-14	122	20-OCT-14	133	20-OCT-14	0.7	20-OCT-14	4	20-OCT-14	102	20-OCT-14	55	20-OCT-14	111	20-OCT-14	2.5	20-OCT-14	1.34	Y	1.38629	1.38629	0.29267	0.29267	1	-0.356675	24.5181	24.5181	26.5617	27	2	0	0	0	1	3	18	0	1	0	0	0	1	1	1	1	1
1536999	24-SEP-14	27-SEP-14	2.5	15-NOV-14	19	15-NOV-14	129	15-NOV-14	0.89	15-NOV-14	17.7	15-NOV-14	93	15-NOV-14	49	15-NOV-14	97	15-NOV-14	2.8	15-NOV-14	1.85	Y	2.87356	2.87356	0.615186	0.615186	1	-0.116534	33.7522	33.7522	35.4016	35	1	1	0	1	1	6	20	2	1	0	0	0	1	1	1	0	0
8168156	05-SEP-08	12-SEP-08	7.7	03-DEC-14	188	03-DEC-14	141	03-DEC-14	1.06	03-DEC-14	3.9	03-DEC-14	20	03-DEC-14	19	03-DEC-14	50	03-DEC-14	4.4	03-DEC-14	1.03	Y	1.36098	1.36098	0.0295588	0.0295588	0.0582689	0.0582689	12.4632	12.4632	8.82832	9
8468964	08-AUG-15	14-AUG-15	3.3	01-MAR-16	43	2018-03-02	135	01-MAR-16	0.79	01-MAR-16	6.7	01-MAR-16	34	01-MAR-16	14	01-MAR-16	114	01-MAR-16	3.3	29-AUG-15	1.31	Y	1.90211	1.90211	0.270027	0.270027	1	-0.235722	26.2143	26.2143	27.1241	27	1	0	0	0	1	11	54	1	3	0	0	0	1	1	1	0	0
1655446	20-AUG-15	22-AUG-15	3.2	27-AUG-15	77	27-AUG-15	134	27-AUG-15	1.62	27-AUG-15	1.1	27-AUG-15	87	27-AUG-15	54	27-AUG-15	199	27-AUG-15	2.8	27-AUG-15	1.22	Y	0.0953102	0.0953102	0.198851	0.198851	0.482426	0.482426	13.6342	13.6342	16.2444	16	1	1	1	0	0	8	18	1	2	0	0	0	1	1	1	0	1
2218768	13-JAN-14	14-JAN-14	8.9	06-NOV-15	138	06-NOV-15	142	06-NOV-15	0.79	06-NOV-15	0.5	06-NOV-15	22	26-OCT-15	13	26-OCT-15	111	26-OCT-15	4	26-OCT-15	1.03		1	-0.693147	0.0295588	0.0295588	1	-0.235722	20.1111	20.1111	16.8294	17	1	0	0	0	1	2	2	0	0	0	0	0	0	0	1	0
0701952	08-NOV-15	20-NOV-15	5.4	22-JUN-16	76	22-JUN-16	130	22-JUN-16	1.14	22-JUN-16	2.2	11-APR-16	50	11-APR-16	28	11-APR-16	126	11-APR-16	2.6	20-NOV-15	1.23	Y	0.788457	0.788457	0.207014	0.207014	0.131028	0.131028	12.9829	12.9829	19.2238	19	1	1	1	0	1	13	43	3	1	0	0	0	1	1	1	1	0
0404532	23-OCT-13	26-OCT-13	13.2	29-DEC-15	198	29-DEC-15	130	29-DEC-15	195.5	29-DEC-15	0.8	29-DEC-15	30	29-DEC-15	26	29-DEC-15	111	29-DEC-15	2.7	29-DEC-15	1.04	Y	1	-0.223144	0.0392207	0.0392207	5.27556	5.27556	61.1364	40	40	40	2	1	1	0	1	3	8	0	0	0	0	0	1	1	0		1
0997197	26-DEC-08	28-DEC-08	8.9	28-JUL-09	206	28-JUL-09	129	28-JUL-09	0.65	28-JUL-09	2.8	09-JUL-09	49	09-JUL-09	28	09-JUL-09	137	09-JUL-09	2.7	09-JUL-09	1.50	Y	1.02962	1.02962	0.405465	0.405465	1	-0.430783	24.4332	24.4332	28.5428	29
1981190	31-AUG-09	02-SEP-09	11.1	17-SEP-09		17-SEP-09	132	17-SEP-09	0.98	17-SEP-09	4.7	17-SEP-09	138	17-SEP-09	44	17-SEP-09	279	17-SEP-09	1.7	17-SEP-09	1.77		1.54756	1.54756	0.57098	0.57098	1	-0.0202027	28.2448	28.2448	30.1844	30
1573468	23-OCT-09	26-OCT-09	7.1	18-JAN-10	70	18-JAN-10	125	18-JAN-10	0.93	18-JAN-10	5.4	15-JAN-10	70	15-JAN-10	44	15-JAN-10	121	15-JAN-10	2.1	15-JAN-10	1.79	Y	1.6864	1.6864	0.582216	0.582216	1	-0.0725707	28.8954	28.8954	33.2928	33
2016727	21-JAN-10	02-FEB-10	16.1	02-FEB-10	193	02-FEB-10	143	02-FEB-10	2.38	02-FEB-10	12.9	02-FEB-10	121	02-FEB-10	48	02-FEB-10	43	02-FEB-10	3.6	02-FEB-10	1.89	Y	2.55723	2.55723	0.636577	0.636577	0.8671	0.8671	31.5241	31.5241	29.8459	30
0581456	20-OCT-10	22-OCT-10	5.5	17-DEC-10	214	17-DEC-10	132	17-DEC-10	1.05	17-DEC-10	5.7	14-DEC-10	63	14-DEC-10	25	14-DEC-10	116	14-DEC-10	3.1	14-DEC-10	1.19	Y	1.74047	1.74047	0.173953	0.173953	0.0487902	0.0487902	15.4242	15.4242	19.4792	19
8089676	01-JUN-11	03-JUN-11	9	02-JUN-11	9999999	02-JUN-11	136	02-JUN-11	1.56	02-JUN-11	12	02-JUN-11	69	02-JUN-11	31	02-JUN-11	71	02-JUN-11	1.8	02-JUN-11	3.23	Y	2.48491	2.48491	1.17248	1.17248	0.444686	0.444686	33.2104	33.2104	33.4344	33
1170955	11-JUL-11	18-AUG-11	10	15-AUG-11	242	15-AUG-11	138	15-AUG-11	0.34	15-AUG-11	0.5	18-JUL-11	19	18-JUL-11	14	18-JUL-11	118	18-JUL-11	1.3	18-JUL-11	0.99	Y	1	-0.693147	-0.0100503	-0.0100503	1	-1.07881	19.6674	19.6674	18.9965	19
1966482	02-JUL-12	13-JUL-12	20.5	12-JUL-12	84	12-JUL-12	134	12-JUL-12	4.89	12-JUL-12	36.3	12-JUL-12	43	12-JUL-12	28	12-JUL-12	47	12-JUL-12	2.3	12-JUL-12	2.48	Y	3.59182	3.59182	0.908259	0.908259	1.58719	1.58719	45.369	40	40	40
0371051	18-APR-13	20-APR-13	7.6	17-OCT-13	23	17-OCT-13	139	17-OCT-13	3.18	17-OCT-13	21.1	17-OCT-13	258	17-OCT-13	65	17-OCT-13	54	17-OCT-13	3.7	17-OCT-13	>11.50	Y	3.04927	3.04927	#VALUE!	#VALUE!	1.15688	1.15688	#VALUE!	#VALUE!	#VALUE!	#VALUE!	3	0	1	1	1	2	7	0	0	0	1	0	1	1	1	1	1
0324895	01-SEP-11	02-SEP-11	3.5	06-NOV-13	79	06-NOV-13	133	06-NOV-13	0.9	06-NOV-13	4.3	06-NOV-13	78	06-NOV-13	36	06-NOV-13	166	06-NOV-13	3	06-NOV-13	1.30		1.45862	1.45862	0.262364	0.262364	1	-0.105361	24.452	24.452	26.5044	27
0200415	24-OCT-13	02-NOV-13	6.7	05-DEC-13	37	05-DEC-13	135	05-DEC-13	2.28	05-DEC-13	7.7	04-DEC-13	53	04-DEC-13	16	04-DEC-13	35	04-DEC-13	2.6	04-DEC-13	2.54	Y	2.04122	2.04122	0.932164	0.932164	0.824175	0.824175	32.4734	32.4734	32.9702	33	1	0	0	0	1	2	25	1	0	0	1	0	1	1	1	0	1
1859827	02-APR-11	03-APR-11	5	28-JUL-16	106	28-JUL-16	131	28-JUL-16	0.91	28-JUL-16	1.8	28-JUL-16	34	28-JUL-16	23	28-JUL-16	60	28-JUL-16	3.5	23-SEP-15	1.36	Y	0.587787	0.587787	0.307485	0.307485	1	-0.0943107	21.6657	21.6657	25.2959	25	4	1	1	0	0	1	5	0	0	0	0	0	0	1	1	0	1
1465052	08-APR-15	11-APR-15	9.2	15-MAY-15	169	15-MAY-15	131	15-MAY-15	0.66	15-MAY-15	4.4	09-MAY-15	51	09-MAY-15	25	09-MAY-15	90	09-MAY-15	2.3	09-MAY-15	1.38		1.4816	1.4816	0.322083	0.322083	1	-0.415515	25.2078	25.2078	28.1367	28	0	1	0	0	0	2	9	1	0	0	1	0	1	0	1	0
7063673	19-AUG-15	30-AUG-15	4.7	27-MAY-16	79	27-MAY-16	138	27-MAY-16	1.07	27-MAY-16	1.2	30-AUG-15	48	30-AUG-15	25	30-AUG-15	119	30-AUG-15	2.5	30-AUG-15	0.98	Y	0.182322	0.182322	-0.0202027	-0.0202027	0.0676586	0.0676586	7.5404	7.5404	6.46923	6	4	1	0	0	0	7	44	1	1	0	0	0	1	1	0	1	1
1164277	18-MAR-14	20-MAR-14	4.7	02-JUN-16	139	02-JUN-16	134	05-AUG-16	0.71	05-AUG-16	3.4	2018-05-17	48	13-OCT-15	32	13-OCT-15	89	13-OCT-15	3.5	13-OCT-15	1.08	Y	1.22378	1.22378	0.076961	0.076961	1	-0.34249	21.4878	21.4878	23.3205	23	1	1	0	0	0	14	72	8	1	0	0	0	1	0	1	0
2023893	31-MAR-14	06-APR-14	6.9	11-AUG-16	214	11-AUG-16	136	11-AUG-16	1.51	11-AUG-16	0.7	11-AUG-16	18	11-AUG-16	16	11-AUG-16	79	11-AUG-16	3.7	09-DEC-15	0.99	Y	1	-0.356675	-0.0100503	-0.0100503	0.41211	0.41211	14.0413	14.0413	14.898	15	1	1	0	1	1		15	1	0	1	0	0	1	1	1	1
0333749	25-NOV-15	04-DEC-15	5.6	25-FEB-16	89	25-FEB-16	131	25-FEB-16	1.35	25-FEB-16	2	24-FEB-16	67	24-FEB-16	27	24-FEB-16	107	24-FEB-16	1.5	15-DEC-15	1.45	Y	0.693147	0.693147	0.371564	0.371564	0.300105	0.300105	16.0836	16.0836	20.8191	21	2	0	0	0	0	4	27	0	2	0	0	0	1	1	1
0380346	13-MAR-12	20-MAR-12	29.3	02-DEC-15	9999999	02-DEC-15	134	04-DEC-15	7.12	04-DEC-15	6.1	04-DEC-15	712	04-DEC-15	284	04-DEC-15	181	04-DEC-15	1.6	04-DEC-15	1.59	Y	1.80829	1.80829	0.463734	0.463734	1.96291	1.96291	37.2442	37.2442	37.517	38
1036935	12-AUG-12	17-AUG-12	5.1	30-JUL-16	202	30-JUL-16	136	30-JUL-16	1.15	30-JUL-16	0.7	30-JUL-16	20	30-JUL-16	12	30-JUL-16	55	30-JUL-16	4	05-DEC-15	0.94	Y	1	-0.356675	-0.0618754	-0.0618754	0.139762	0.139762	10.8545	10.8545	11.8163	12	5	0	0	0	1	4	7	0	1	1	0	0	1	1	1	0	1
7052695	16-SEP-15	19-SEP-15	5.3	17-JUN-16	169	17-JUN-16	133	05-JUL-16	0.74	05-JUL-16	1.2	17-JUN-16	50	17-JUN-16	24	17-JUN-16	127	17-JUN-16	2.1	21-DEC-15	1.16		0.182322	0.182322	0.14842	0.14842	1	-0.301105	18.3515	18.3515	21.2091	21	4	0	1	0	1	5	19	4	0	0	0	0	1	1	1	1
1627215	19-MAY-06	24-MAY-06	6.6	24-MAY-06	133	24-MAY-06	140	24-MAY-06	3.5	24-MAY-06	3.7	24-MAY-06	59	24-MAY-06	21	24-MAY-06	155	24-MAY-06	1.5	24-MAY-06	1.47	Y	1.30833	1.30833	0.385262	0.385262	1.25276	1.25276	27.6794	27.6794	26.4596	26
1102694	19-NOV-07	22-NOV-07	7.1	03-DEC-07	9999999	03-DEC-07	140	03-DEC-07	7.3	03-DEC-07	19.2	03-DEC-07	70	03-DEC-07	28	03-DEC-07	123	03-DEC-07	1.9	03-DEC-07	2.31	Y	2.95491	2.95491	0.837248	0.837248	1.98787	1.98787	46.0007	40	40	40
0365753	16-APR-09	17-APR-09	4.4	18-FEB-11	89	18-FEB-11	139	18-FEB-11	0.69	18-FEB-11	9999999	16-APR-09	52	16-APR-09	39	16-APR-09	78	16-APR-09	3.2	16-APR-09	1.22		16.1181	16.1181	0.198851	0.198851	1	-0.371064	79.1535	40	40	40
1491867	18-APR-09	08-FEB-10	5.3	03-FEB-10	113	03-FEB-10	141	03-FEB-10	0.44	03-FEB-10	9999999	20-DEC-09	62	21-APR-09	34	21-APR-09	50	21-APR-09	3.5	13-AUG-09	1.30	Y	16.1181	16.1181	0.262364	0.262364	1	-0.820981	79.8649	40	40	40
0665963	13-MAR-10	25-MAR-10	4.5	08-NOV-10	77	08-NOV-10	138	08-NOV-10	1.43	08-NOV-10	1.9	08-NOV-10	69	08-NOV-10	45	08-NOV-10	233	08-NOV-10	2.8	08-NOV-10	1.27	Y	0.641854	0.641854	0.239017	0.239017	0.357674	0.357674	14.9561	14.9561	14.1297	14
1623333	31-JAN-11	04-FEB-11	4.5	04-FEB-11	63	04-FEB-11	140	04-FEB-11	1.47	04-FEB-11	9999999	02-FEB-11	29	02-FEB-11	15	02-FEB-11	117	02-FEB-11	2.1	02-FEB-11	1.53		16.1181	16.1181	0.425268	0.425268	0.385262	0.385262	75.8064	40	40	40
1696244	27-JUL-10	29-JUL-10	2.9	07-APR-11	91	07-APR-11	138	07-APR-11	0.58	07-APR-11	9999999	06-APR-11	28	05-APR-11	21	05-APR-11	78	05-APR-11	2.8	05-APR-11	1.10	Y	16.1181	16.1181	0.0953102	0.0953102	1	-0.544727	77.9939	40	40	40
0277379	30-JUN-11	07-JUL-11	10	02-JUL-11	36	02-JUL-11	136	02-JUL-11	2.85	02-JUL-11	4.9	30-JUN-11	45	30-JUN-11	25	30-JUN-11	85	30-JUN-11	3.8	30-JUN-11	1.63	Y	1.58924	1.58924	0.48858	0.48858	1.04732	1.04732	27.9322	27.9322	28.3305	28
1796252	08-AUG-11	17-AUG-11	3.9	30-AUG-11	276	30-AUG-11	137	30-AUG-11	1.08	30-AUG-11	2.1	12-AUG-11	240	12-AUG-11	245	12-AUG-11	114	12-AUG-11	3	12-AUG-11	2.57	Y	0.741937	0.741937	0.943906	0.943906	0.076961	0.076961	20.5428	20.5428	20.5428	21
1876935	15-NOV-11	29-NOV-11	17.5	28-NOV-11	76	28-NOV-11	129	28-NOV-11	2.74	28-NOV-11	17.7	28-NOV-11	53	28-NOV-11	25	28-NOV-11	117	28-NOV-11	3.5	28-NOV-11	2.51	Y	2.87356	2.87356	0.920283	0.920283	1.00796	1.00796	37.2454	37.2454	37.9726	38
0322579	26-JUL-13	09-AUG-13	6.6	08-AUG-13	113	08-AUG-13	132	08-AUG-13	0.7	08-AUG-13	2.7	08-AUG-13	60	08-AUG-13	31	08-AUG-13	97	08-AUG-13	1.9	08-AUG-13	1.28	Y	0.993252	0.993252	0.24686	0.24686	1	-0.356675	22.5193	22.5193	25.4036	25	1
1945835	20-AUG-13	21-AUG-13	3	09-SEP-13	49	09-SEP-13	143	09-SEP-13	3.15	09-SEP-13	2.5	09-SEP-13	42	09-SEP-13	20	09-SEP-13	89	09-SEP-13	2.9	09-SEP-13	1.48	Y	0.916291	0.916291	0.392042	0.392042	1.1474	1.1474	25.2651	25.2651	22.3476	22	1	1	0	0	0	6	45	4	1	0	0	0	1	1	1	0	1
0280226	07-AUG-14	12-AUG-14	2.5	07-OCT-14	53	07-OCT-14	135	07-OCT-14	0.72	07-OCT-14	3.6	07-OCT-14	138	07-OCT-14	67	07-OCT-14	75	07-OCT-14	2.2	07-OCT-14	1.40	Y	1.28093	1.28093	0.336472	0.336472	1	-0.328504	24.6104	24.6104	25.6261	26	2	1	0	0	1	1	5	0	0	0	0	0	1		1	0
2190701	04-SEP-14	15-SEP-14	5.8	19-MAR-15	140	19-MAR-15	136	19-MAR-15	0.88	19-MAR-15	1.3	19-MAR-15	69	19-MAR-15	51	19-MAR-15	148	19-MAR-15	3.3	19-MAR-15	1.05	Y	0.262364	0.262364	0.0487902	0.0487902	1	-0.127833	17.5382	17.5382	18.2794	18	1	0	0	0	1	1	11	0	0	0	0	0	1	1	1	0
8064005	04-AUG-15	11-AUG-15	8.1	06-AUG-15	206	06-AUG-15	141	08-AUG-15	0.56	08-AUG-15	1.1	04-AUG-15	30	04-AUG-15	14	04-AUG-15	104	04-AUG-15	2.6	04-AUG-15	1.02	Y	0.0953102	0.0953102	0.0198026	0.0198026	1	-0.579818	16.5821	16.5821	13.4909	13	1	1	1		1	3	13	0	2	0	1	0				0
0925737	04-MAR-13	08-MAR-13	5.7	18-DEC-15	107	18-DEC-15	146	20-DEC-15	0.72	20-DEC-15	1.8	18-DEC-15	49	18-DEC-15	24	18-DEC-15	88	18-DEC-15	2.6	18-DEC-15	1.40	Y	0.587787	0.587787	0.336472	0.336472	1	-0.328504	21.9903	21.9903	16.6414	17	1	0	0	1	1	8	70	3	1	0	0	0	1	1	1	0	1
0144454	12-JAN-10	16-JAN-10	4.4	09-DEC-15	89	09-DEC-15	132	09-DEC-15	1.38	09-DEC-15	2.8	01-DEC-15	61	30-NOV-15	37	30-NOV-15	85	30-NOV-15	2.2	30-NOV-15	1.57	Y	1.02962	1.02962	0.451076	0.451076	0.322083	0.322083	18.4563	18.4563	22.0111	22	1	0	0	0	1	3	24	0	1	0	0	0	1	1	1	0	0
0712472	21-FEB-11	16-MAR-11	7.6	15-MAR-11	9999999	15-MAR-11	122	15-MAR-11	1.03	15-MAR-11	9999999	10-MAR-11	51	08-MAR-11	30	08-MAR-11	190	08-MAR-11	2.1	10-MAR-11	1.66	Y	16.1181	16.1181	0.506818	0.506818	0.0295588	0.0295588	73.3156	40	40	40
0981053	06-MAY-12	09-MAY-12	5.2	22-JUN-12	9999999	22-JUN-12	134	15-JUN-12	1.55	15-JUN-12	1.2	15-JUN-12	46	15-JUN-12	31	15-JUN-12	87	15-JUN-12	2.9	15-JUN-12	1.48	Y	0.182322	0.182322	0.392042	0.392042	0.438255	0.438255	15.7041	15.7041	18.1094	18
1302511	07-JUL-12	11-JUL-12	12.1	30-JUL-12	71	30-JUL-12	137	30-JUL-12	2.66	30-JUL-12	9999999	30-JUL-12	131	30-JUL-12	104	30-JUL-12	334	30-JUL-12	1.8	30-JUL-12	2.33	Y	16.1181	16.1181	0.845868	0.845868	0.978326	0.978326	86.1927	40	40	40
0634047	09-MAY-12	12-MAY-12	3.1	25-SEP-12	88	25-SEP-12	138	25-SEP-12	0.54	25-SEP-12	2.3	25-SEP-12	221	25-SEP-12	28	25-SEP-12	193	25-SEP-12	2.1	25-SEP-12	1.37		0.832909	0.832909	0.314811	0.314811	1	-0.616186	22.6743	22.6743	22.1025	22
2041612	11-NOV-12	17-NOV-12	5.8	17-NOV-12	9999999	17-NOV-12	134	17-NOV-12	0.9	17-NOV-12	3.2	14-NOV-12	50	14-NOV-12	40	14-NOV-12	92	14-NOV-12	2.9	14-NOV-12	1.22	Y	1.16315	1.16315	0.198851	0.198851	1	-0.105361	22.6238	22.6238	24.3441	24
0351412	11-AUG-13	12-AUG-13	5	18-AUG-13	77	18-AUG-13	135	18-AUG-13	1.03	18-AUG-13	1.6	18-AUG-13	46	18-AUG-13	31	18-AUG-13	125	18-AUG-13	2	18-AUG-13	1.25		0.470004	0.470004	0.223144	0.223144	0.0295588	0.0295588	10.9887	10.9887	12.9034	13	4	0	0	0	0	3	8	1	0	0	0	0	0	0	1	1
2077454	20-SEP-13	26-SEP-13	11.8	13-APR-14	55	13-APR-14	133	13-APR-14	0.58	13-APR-14	0.7	08-APR-14	48	08-APR-14	32	08-APR-14	132	08-APR-14	1.8	13-APR-14	1.31	Y	1	-0.356675	0.270027	0.270027	1	-0.544727	22.8043	22.8043	25.0741	25	2	0	1	0	0	3	20	1	0	0	1	0	1	0	1	0	1
0448341	09-DEC-14	15-DEC-14	2.9	12-DEC-14	82	12-DEC-14	137	12-DEC-14	0.81	12-DEC-14	4.7	09-DEC-14	121	09-DEC-14	102	09-DEC-14	156	09-DEC-14	3.5	09-DEC-14	1.39	Y	1.54756	1.54756	0.329304	0.329304	1	-0.210721	25.538	25.538	25.538	26	2	1	0	0	1	6	45	2	1	0	0	0	1	1	1	0	1
7058121	21-MAR-15	24-MAR-15	26.3	23-MAR-15	123	23-MAR-15	131	23-MAR-15	9.76	23-MAR-15	41	24-MAR-15	55	24-MAR-15	34	24-MAR-15	85	24-MAR-15	4.4	24-MAR-15	1.94		3.71357	3.71357	0.662688	0.662688	2.27829	2.27829	49.6927	40	40	40	2	0	0	0		1	3	0	0	0	0	0	0		1	0
2000382	07-MAR-10	09-MAR-10	15.2	07-MAR-10	9999999	07-MAR-10	134	07-MAR-10	4.64	07-MAR-10	9999999	07-MAR-10	112	07-MAR-10	28	07-MAR-10	51	07-MAR-10	1.5	07-MAR-10	2.35	Y	16.1181	16.1181	0.854415	0.854415	1.53471	1.53471	91.6131	40	40	40
2034373	11-MAY-10	15-MAY-10	6.3	04-AUG-10	214	04-AUG-10	134	15-MAY-10	1.04	15-MAY-10	9999999	04-AUG-10	88	04-AUG-10	84	04-AUG-10	221	04-AUG-10	3.8	04-AUG-10	0.89		16.1181	16.1181	-0.116534	-0.116534	0.0392207	0.0392207	66.4266	40	40	40
0412251	13-OCT-10	21-OCT-10	5.7	20-OCT-10	161	20-OCT-10	134	20-OCT-10	0.59	20-OCT-10	3.7	20-OCT-10	35	20-OCT-10	16	20-OCT-10	66	20-OCT-10	1.9	20-OCT-10	1.53	Y	1.30833	1.30833	0.425268	0.425268	1	-0.527633	25.7085	25.7085	27.1234	27
0456171	03-MAR-11	05-MAR-11	7.2	05-MAR-11	78	05-MAR-11	129	05-MAR-11	1.2	05-MAR-11	6.6	04-MAR-11	50	04-MAR-11	39	04-MAR-11	70	04-MAR-11	2.2	04-MAR-11	2.02	Y	1.88707	1.88707	0.703098	0.703098	0.182322	0.182322	23.1826	23.1826	27.6224	28
1771901	19-AUG-11	21-AUG-11	11.6	20-AUG-11	153	20-AUG-11	134	20-AUG-11	1.39	20-AUG-11	9999999	19-AUG-11	34	19-AUG-11	9	19-AUG-11	81	19-AUG-11	1.7	19-AUG-11	1.35	Y	16.1181	16.1181	0.300105	0.300105	0.329304	0.329304	73.869	40	40	40
2093735	03-FEB-12	09-FEB-12	3.5	09-FEB-12	48	09-FEB-12	133	09-FEB-12	2.24	09-FEB-12	7.7	09-FEB-12	119	09-FEB-12	38	09-FEB-12	125	09-FEB-12	1.4	09-FEB-12	2.15	Y	2.04122	2.04122	0.765468	0.765468	0.806476	0.806476	30.437	30.437	31.6993	32
1517194	02-FEB-12	04-FEB-12	4.7	30-JUL-12	75	30-JUL-12	131	30-AUG-12	1.46	30-AUG-12	5	30-AUG-12	198	30-AUG-12	154	30-AUG-12	282	30-AUG-12	2.6	30-AUG-12	1.16	Y	1.60944	1.60944	0.14842	0.14842	0.378436	0.378436	17.7976	17.7976	22.1937	22
1150533	28-AUG-12	01-SEP-12	30.9	01-SEP-12	9999999	01-SEP-12	131	01-SEP-12	0.39	01-SEP-12	0.9	29-AUG-12	745	29-AUG-12	243	29-AUG-12	1992	29-AUG-12	9999999	29-AUG-12	1.05	Y	1	-0.105361	0.0487902	0.0487902	1	-0.941609	20.3264	20.3264	24.2218	24
2192307	30-AUG-12	04-SEP-12	9.5	03-SEP-12	9999999	03-SEP-12	132	03-SEP-12	0.73	03-SEP-12	15.9	03-SEP-12	73	03-SEP-12	32	03-SEP-12	232	03-SEP-12	1.8	03-SEP-12	1.84	Y	2.76632	2.76632	0.609766	0.609766	1	-0.314711	33.2861	33.2861	34.3939	34
2213102	2012-12-02	05-DEC-12	6.9	05-DEC-12	78	05-DEC-12	136	05-DEC-12	0.8	05-DEC-12	3.3	05-DEC-12	128	05-DEC-12	93	05-DEC-12	161	05-DEC-12	3.6	05-DEC-12	1.27		1.19392	1.19392	0.239017	0.239017	1	-0.223144	23.19	23.19	23.7447	24
0815491	05-FEB-13	16-FEB-13	6.6	01-MAR-13	68	01-MAR-13	138	01-MAR-13	0.86	01-MAR-13	2.4	27-FEB-13	59	27-FEB-13	27	27-FEB-13	117	27-FEB-13	1.7	27-FEB-13	1.34	Y	0.875469	0.875469	0.29267	0.29267	1	-0.150823	22.5872	22.5872	22.0125	22	2	1	0	0	0	2	14	1	0	0	0	0	1	1	1	0	1
0379763	14-SEP-14	19-SEP-14	9.5	17-FEB-16	45	17-FEB-16	128	17-FEB-16	0.76	17-FEB-16	3.5	17-FEB-16	89	17-FEB-16	50	17-FEB-16	100	17-FEB-16	2.3	22-NOV-14	1.39	Y	1.25276	1.25276	0.329304	0.329304	1	-0.274437	24.4236	24.4236	29.0498	29	1	0	1	0		9	46	1	4	0	0	0	1	0	0	0
1952323	21-FEB-14	25-FEB-14	6.6	14-DEC-14	139	14-DEC-14	133	14-DEC-14	0.46	14-DEC-14	0.7	14-DEC-14	59	14-DEC-14	27	14-DEC-14	149	14-DEC-14	2.7	14-DEC-14	1.15	Y	1	-0.356675	0.139762	0.139762	1	-0.776529	21.3453	21.3453	23.8077	24	3	1	0	0	1	9	51	4	3	0	0	0	1	1	1	0	1
1422380	26-JAN-09	06-FEB-09	2.7	30-JUL-16	207	30-JUL-16	136	30-JUL-16	1.3	30-JUL-16	1.4	30-JUL-16	19	30-JUL-16	17	30-JUL-16	68	30-JUL-16	4.3	07-NOV-15	1.12	Y	0.336472	0.336472	0.113329	0.113329	0.262364	0.262364	11.482	11.482	12.4231	12	1	1	0	0	1	1	2	0	0	1	0	0	0	0	0	1
0959220	22-OCT-15	01-NOV-15	19.8	10-DEC-15	178	10-DEC-15	132	09-DEC-15	1.36	09-DEC-15	2.4	10-DEC-15	40	10-DEC-15	20	10-DEC-15	104	10-DEC-15	3	10-DEC-15	1.25	Y	0.875469	0.875469	0.223144	0.223144	0.307485	0.307485	15.1811	15.1811	19.2762	19	1	0	0	0	1	2	12	0	1	0	1	0	1		1	0
1674804	12-JAN-12	24-JAN-12	13.4	09-MAR-16	369	09-MAR-16	133	09-MAR-16	5.96	09-MAR-16	9999999	04-MAR-16	26	04-MAR-16	21	04-MAR-16	111	04-MAR-16	4.4	15-DEC-15	1.52	Y	16.1181	16.1181	0.41871	0.41871	1.78507	1.78507	89.1291	40	40	40
0465280	26-MAR-15	31-MAR-15	11.4	13-JUL-16	387	13-JUL-16	138	13-JUL-16	0.93	13-JUL-16	9999999	13-JUL-16	35	13-JUL-16	19	13-JUL-16	76	13-JUL-16	4.1	30-DEC-15	0.91		16.1181	16.1181	-0.0943107	-0.0943107	1	-0.0725707	75.8701	40	40	40
1750541	27-JAN-10	29-JAN-10	5	29-JAN-10	37	29-JAN-10	135	29-JAN-10	1.1	29-JAN-10	1.7	28-JAN-10	37	28-JAN-10	18	28-JAN-10	101	28-JAN-10	2.2	28-JAN-10	1.26	Y	0.530628	0.530628	0.231112	0.231112	0.0953102	0.0953102	11.9363	11.9363	13.7885	14
0901619	31-MAR-10	06-APR-10	5.5	05-APR-10	102	05-APR-10	125	05-APR-10	1302	06-APR-10	42	05-APR-10	177	05-APR-10	87	05-APR-10	212	05-APR-10	3.6	05-APR-10	2.03		3.73767	3.73767	0.708036	0.708036	7.17166	7.17166	97.1211	40	40	40
1781671	06-AUG-10	01-SEP-10	12.8	01-SEP-10	9999999	01-SEP-10	134	01-SEP-10	3.71	01-SEP-10	14.4	01-SEP-10	1033	01-SEP-10	225	01-SEP-10	68	01-SEP-10	3	01-SEP-10	2.10	Y	2.66723	2.66723	0.741937	0.741937	1.31103	1.31103	37.3684	37.3684	37.6289	38
0269732	11-JUL-11	21-JUL-11	6.3	21-JUL-11	9999999	21-JUL-11	134	21-JUL-11	1.03	21-JUL-11	4	21-JUL-11	116	21-JUL-11	58	21-JUL-11	201	21-JUL-11	1.5	21-JUL-11	2.05	Y	1.38629	1.38629	0.71784	0.71784	0.0295588	0.0295588	19.9929	19.9929	21.9736	22
2093497	27-NOV-11	07-DEC-11	12.7	07-DEC-11	87	07-DEC-11	125	07-DEC-11	1.27	07-DEC-11	6.4	07-DEC-11	116	07-DEC-11	27	07-DEC-11	314	07-DEC-11	2.1	07-DEC-11	1.51	Y	1.8563	1.8563	0.41211	0.41211	0.239017	0.239017	20.3498	20.3498	28.1313	28
0163365	27-JUN-12	02-JUL-12	12.6	01-JUL-12	58	01-JUL-12	126	01-JUL-12	2.05	01-JUL-12	5.1	01-JUL-12	474	01-JUL-12	146	01-JUL-12	194	01-JUL-12	1.8	01-JUL-12	1.71		1.62924	1.62924	0.536493	0.536493	0.71784	0.71784	25.467	25.467	30.7425	31
1407689	17-JUN-13	05-JUL-13	16.5	25-JUN-13	96	25-JUN-13	137	25-JUN-13	3.33	25-JUN-13	26.8	17-JUN-13	144	17-JUN-13	51	17-JUN-13	139	17-JUN-13	2.6	25-JUN-13	1.93	Y	3.2884	3.2884	0.65752	0.65752	1.20297	1.20297	37.7368	37.7368	37.7368	38	1	0	0	0	0	2	42	1	0	0	1	0	1		1	0
1446274	21-OCT-13	24-OCT-13	4.8	31-DEC-13	12	31-DEC-13	131	30-DEC-13	0.45	30-DEC-13	22.8	29-DEC-13	50	29-DEC-13	18	29-DEC-13	70	29-DEC-13	1.7	29-DEC-13	2.26	Y	3.12676	3.12676	0.815365	0.815365	1	-0.798508	36.9512	36.9512	37.5549	38	3	0	0	1	1	3	24	0	2	0	1	0	1	1	1	0	0
8255133	10-MAR-13	21-MAR-13	11.5	07-SEP-14	224	07-SEP-14	136	07-SEP-14	1.41	07-SEP-14	0.7	05-SEP-14	52	05-SEP-14	28	05-SEP-14	120	05-SEP-14	2.3	05-SEP-14	1.09	Y	1	-0.356675	0.0861777	0.0861777	0.34359	0.34359	14.4633	14.4633	15.3061	15	1	1	1	0	1	2	22	0	0	0	0	0	1	1	1	0	1
1359462	07-JAN-14	17-JAN-14	8.7	19-JAN-16	222	19-JAN-16	139	19-JAN-16	0.74	19-JAN-16	0.6	19-APR-16	91	19-APR-16	79	19-APR-16	122	19-APR-16	3.7	13-OCT-15	1.04	Y	1	-0.510826	0.0392207	0.0392207	1	-0.301105	20.2193	20.2193	18.9137	19	3	1	0	0	1	4	20	0	0	0	0	0	0
2297317	08-JAN-15	29-JAN-15	7	27-JAN-15	36	27-JAN-15	138	27-JAN-15	2.93	27-JAN-15	10.2	27-JAN-15	124	27-JAN-15	37	27-JAN-15	49	27-JAN-15	4	27-JAN-15	2.89	Y	2.32239	2.32239	1.06126	1.06126	1.075	1.075	37.3825	37.3825	37.2961	37	2	0	1	0	0	3	40	0	0	0	1	0	1	1	1		1
1029463	13-AUG-12	16-AUG-12	6.4	30-JAN-15	196	30-JAN-15	130	09-APR-15	0.69	09-APR-15	9999999	11-MAY-16	28	09-APR-15	22	09-APR-15	87	09-APR-15	3.1	09-APR-15	1.06		16.1181	16.1181	0.0582689	0.0582689	1	-0.371064	77.579	40	40	40
0838662	15-JAN-14	19-JAN-14	6	19-JUN-16	145	19-JUN-16	135	19-JUN-16	1.15	19-JUN-16	5.3	19-JUN-16	120	19-JUN-16	59	19-JUN-16	554	19-JUN-16	3.2	11-JUL-15	1.09	Y	1.66771	1.66771	0.0861777	0.0861777	0.139762	0.139762	15.0366	15.0366	16.6842	17	3	0	0	1	1	5	18	1	0	0	0	0	0	0	0	0
0573306	22-JUL-14	29-JUL-14	4.7	07-AUG-16	79	07-AUG-16	135	07-AUG-16	1.01	07-AUG-16	2.4	04-AUG-16	67	04-AUG-16	28	04-AUG-16	157	04-AUG-16	2.9	21-DEC-15	1.07	Y	0.875469	0.875469	0.0676586	0.0676586	0.00995033	0.00995033	10.5923	10.5923	12.5332	13	3	0	0	0	1	16	73	3	6	0	0	1	1	0	0	0	0
1067675	17-MAR-15	27-MAR-15	4.4	06-JUN-16	295	06-JUN-16	137	04-AUG-16	2.59	04-AUG-16	0.4	04-AUG-16	27	04-AUG-16	17	04-AUG-16	93	04-AUG-16	2.1	30-NOV-15	2.88	Y	1	-0.916291	1.05779	1.05779	0.951658	0.951658	31.1646	31.1646	31.1646	31	1	1	1	0	0	6	75	2	3	0	1	0	0	0	1	0
0536700	08-JAN-15	09-JAN-15	4.4	22-JUL-16	69	22-JUL-16	134	22-JUL-16	1.1	22-JUL-16	1.4	22-JUL-16	44	22-JUL-16	30	22-JUL-16	211	22-JUL-16	2.5	08-JUL-15	1.11		0.336472	0.336472	0.10436	0.10436	0.0953102	0.0953102	9.78282	9.78282	12.7743	13	4	1	0		1	12	34	3	1	0	0	0	1	1	1	0	1
0999359	24-JUN-15	26-JUN-15	3.8	11-MAR-16	172	11-MAR-16	140	05-JUL-16	0.73	05-JUL-16	1.2	07-AUG-15	37	07-AUG-15	28	07-AUG-15	78	07-AUG-15	3.9	07-AUG-15	3.33		0.182322	0.182322	1.20297	1.20297	1	-0.314711	30.1625	30.1625	29.1885	29	3	0	1	1	1
1942578	25-DEC-08	26-DEC-08	3.4	26-DEC-08	9999999	26-DEC-08	133	26-DEC-08	1.18	26-DEC-08	1.3	24-DEC-08	64	24-DEC-08	39	24-DEC-08	135	24-DEC-08	2.6	24-DEC-08	0.89		0.262364	0.262364	-0.116534	-0.116534	0.165514	0.165514	7.70053	7.70053	11.9641	12
1260840	12-APR-09	15-APR-09	9.4	15-APR-09	9999999	15-APR-09	134	15-APR-09	1.19	15-APR-09	9999999	12-APR-09	270	12-APR-09	121	12-APR-09	165	12-APR-09	2.1	12-APR-09	1.33		16.1181	16.1181	0.285179	0.285179	0.173953	0.173953	72.2151	40	40	40
2004777	29-SEP-09	30-SEP-09	4.8	30-SEP-09	58	30-SEP-09	139	30-SEP-09	1.36	30-SEP-09	2.1	30-SEP-09	31	30-SEP-09	24	30-SEP-09	50	30-SEP-09	2.9	30-SEP-09	1.18		0.741937	0.741937	0.165514	0.165514	0.307485	0.307485	14.0309	14.0309	12.317	12
1748261	11-FEB-10	13-FEB-10	8.6	13-FEB-10	9999999	13-FEB-10	138	13-FEB-10	0.61	13-FEB-10	1.1	13-FEB-10	37	13-FEB-10	35	13-FEB-10	100	13-FEB-10	2.6	13-FEB-10	1.09	Y	0.0953102	0.0953102	0.0861777	0.0861777	1	-0.494296	17.3255	17.3255	16.5772	17
1659662	26-MAR-09	04-APR-09	3.4	20-APR-10	9999999	20-APR-10	129	20-APR-10	0.62	20-APR-10	9999999	18-APR-10	77	18-APR-10	47	18-APR-10	110	18-APR-10	1.6	18-APR-10	2.13	Y	16.1181	16.1181	0.756122	0.756122	1	-0.478036	85.395	40	40	40
0977797	24-JUL-08	25-JUL-08	5.8	16-JUL-10	150	16-JUL-10	130	16-JUL-10	0.74	16-JUL-10	0.8	27-APR-10	47	27-APR-10	49	27-APR-10	183	27-APR-10	2.7	27-APR-10	1.17	Y	1	-0.223144	0.157004	0.157004	1	-0.301105	21.5384	21.5384	25.8031	26
1421189	26-OCT-10	29-OCT-10	6.4	02-FEB-11	66	2017-05-26	138	29-OCT-10	0.56	29-OCT-10	0.8	02-FEB-11	24	02-FEB-11	15	02-FEB-11	71	02-FEB-11	3.2	02-FEB-11	1.11	Y	1	-0.223144	0.10436	0.10436	1	-0.579818	20.9488	20.9488	20.3201	20	4	1	0	0	0	1	1	0	0	0	0	0	0	1	0	0	1
1667346	10-APR-11	11-APR-11	2.1	03-JUN-11	9999999	03-JUN-11	127	04-JUN-11	0.78	04-JUN-11	6	04-JUN-11	82	04-JUN-11	38	04-JUN-11	62	04-JUN-11	2.5	04-JUN-11	1.72	Y	1.79176	1.79176	0.542324	0.542324	1	-0.248461	28.8469	28.8469	32.5274	33
2127565	29-MAR-12	07-APR-12	8.2	07-APR-12	180	07-APR-12	133	07-APR-12	1.31	07-APR-12	0.9	03-APR-12	26	03-APR-12	13	03-APR-12	56	03-APR-12	2.7	03-APR-12	1.17		1	-0.105361	0.157004	0.157004	0.270027	0.270027	14.5526	14.5526	17.9117	18
8051111	03-MAR-12	09-MAR-12	4.6	10-MAY-12	147	10-MAY-12	134	14-JUN-12	1.33	14-JUN-12	1.1	10-MAY-12	31	10-MAY-12	21	10-MAY-12	139	10-MAY-12	2.1	10-MAY-12	1.17	Y	0.0953102	0.0953102	0.157004	0.157004	0.285179	0.285179	11.2779	11.2779	14.1214	14
0531560	01-DEC-12	07-DEC-12	5.9	07-DEC-12	75	07-DEC-12	139	07-DEC-12	0.64	07-DEC-12	3.3	07-DEC-12	61	07-DEC-12	33	07-DEC-12	128	07-DEC-12	2.8	07-DEC-12	1.27	Y	1.19392	1.19392	0.239017	0.239017	1	-0.446287	23.19	23.19	22.0806	22
1278729	14-JUL-13	18-JUL-13	5.3	24-JUL-13	82	24-JUL-13	128	24-JUL-13	1.36	24-JUL-13	4.9	24-JUL-13	55	24-JUL-13	38	24-JUL-13	86	24-JUL-13	1.7	24-JUL-13	1.50	Y	1.58924	1.58924	0.405465	0.405465	0.307485	0.307485	19.9211	19.9211	25.8846	26	2	0	0	0	1	1	4	0	0	0	0	0	1	1	1	0	1
0286822	22-JUL-13	28-JUL-13	9.5	07-AUG-13	363	07-AUG-13	141	07-AUG-13	3.63	07-AUG-13	0.5	07-AUG-13	101	07-AUG-13	51	07-AUG-13	157	07-AUG-13	3.1	07-AUG-13	1.30	Y	1	-0.693147	0.262364	0.262364	1.28923	1.28923	25.4864	25.4864	23.5706	24	1	0	1	1	1	1	6	0	0	0	0	0	1	0	1	0
1930252	10-OCT-13	18-OCT-13	11	18-OCT-13	316	18-OCT-13	131	18-OCT-13	1.2	18-OCT-13	0.6	11-OCT-13	35	11-OCT-13	35	11-OCT-13	65	11-OCT-13	2.9	11-OCT-13	1.11		1	-0.510826	0.10436	0.10436	0.182322	0.182322	13.1236	13.1236	18.4452	18	1	0	0	1	1	2	17	1	0	0	1	0	1		1	0
2270991	06-SEP-13	11-SEP-13	4.3	11-SEP-13	57	11-SEP-13	137	11-SEP-13	0.7	11-SEP-13	3.1	07-SEP-13	68	07-SEP-13	24	07-SEP-13	75	07-SEP-13	1.9	07-SEP-13	1.50		1.1314	1.1314	0.405465	0.405465	1	-0.356675	24.8179	24.8179	24.8179	25	0	1	0	0	1	1	5	0	0	0	0	0	0		1	0
1994836	19-MAR-15	24-MAR-15	4.3	23-MAR-15	122	23-MAR-15	135	23-MAR-15	1.67	23-MAR-15	0.6	23-MAR-15	61	23-MAR-15	36	23-MAR-15	85	23-MAR-15	209	01-APR-15	1.22	Y	1	-0.510826	0.198851	0.198851	0.512824	0.512824	17.3449	17.3449	18.8401	19	2	0	0	0	1	2	9	0	1	0	0	0	0		1
1517503	16-APR-10	23-APR-10	10	18-MAY-16	360	18-MAY-16	136	20-APR-16	1.05	20-APR-16	9999999	26-JUL-16	25	20-APR-16	19	20-APR-16	97	20-APR-16	4	22-OCT-15	0.98	Y	16.1181	16.1181	-0.0202027	-0.0202027	0.0487902	0.0487902	67.5971	40	40	40
1242132	01-APR-08	03-APR-08	6.4	15-OCT-12	128	15-OCT-12	141	19-MAR-14	107.14	19-MAR-14	0.6	19-MAR-14	20	19-MAR-14	20	19-MAR-14	61	19-MAR-14	4.7	19-MAR-14	0.93		1	-0.510826	-0.0725707	-0.0725707	4.67414	4.67414	54.1287	40	40	40
1947648	26-AUG-08	05-SEP-08	8	05-JUN-09	197	05-JUN-09		05-JUN-09	1.05	05-JUN-09	1.1	05-JUN-09	44	05-JUN-09	31	05-JUN-09	157	05-JUN-09	3.6	05-JUN-09	0.95		0.0953102	0.0953102	-0.0512933	-0.0512933	0.0487902	0.0487902	6.68271	6.68271	NA	#VALUE!
0408402	20-SEP-09	22-SEP-09	10.6	22-SEP-09	9999999	22-SEP-09	139	22-SEP-09	1.45	22-SEP-09	14	22-SEP-09	736	22-SEP-09	94	22-SEP-09	82	22-SEP-09	1.8	22-SEP-09	3.47	Y	2.63906	2.63906	1.24415	1.24415	0.371564	0.371564	33.896	33.896	33.4932	33
0306851	12-DEC-09	18-DEC-09	10.4	14-JAN-10	9999999	14-JAN-10	132	14-JAN-10	2.43	14-JAN-10	9999999	14-JAN-10	1526	14-JAN-10	371	14-JAN-10	176	14-JAN-10	2.6	14-JAN-10	1.54	Y	16.1181	16.1181	0.431782	0.431782	0.887891	0.887891	80.6895	40	40	40
1917021	09-FEB-10	12-FEB-10	5.2	23-FEB-10	128	23-FEB-10	140	23-FEB-10	1.77	23-FEB-10	9999999	23-FEB-10	78	23-FEB-10	48	23-FEB-10	115	23-FEB-10	3.5	23-FEB-10	1.16	Y	16.1181	16.1181	0.14842	0.14842	0.57098	0.57098	74.483	40	40	40
0838979	20-MAR-10	10-APR-10	19.1	20-APR-10	9999999	20-APR-10	147	20-APR-10	1.32	20-APR-10	6.6	16-APR-10	99	16-APR-10	36	16-APR-10	88	16-APR-10	3.3	20-APR-10	3.74	Y	1.88707	1.88707	1.31909	1.31909	0.277632	0.277632	30.9938	30.9938	28.0218	28
0811371	18-JUL-09	25-JUL-09	3	29-OCT-12	50	29-OCT-12	138	12-MAY-10	1.06	12-MAY-10	1.9	12-MAY-10	44	12-MAY-10	28	12-MAY-10	95	12-MAY-10	2.7	12-MAY-10	1.33	Y	0.641854	0.641854	0.285179	0.285179	0.0582689	0.0582689	12.6078	12.6078	11.7039	12
0967729	06-JAN-11	12-JAN-11	11.6	12-JAN-11	9999999	12-JAN-11	138	12-JAN-11	6.38	12-JAN-11	17.8	12-JAN-11	157	12-JAN-11	119	12-JAN-11	124	12-JAN-11	3.2	12-JAN-11	3.54	Y	2.8792	2.8792	1.26413	1.26413	1.85317	1.85317	49.2064	40	40	40
1193906	08-JUL-12	10-JUL-12	18.1	08-JUL-12	54	08-JUL-12	127	08-JUL-12	2.72	08-JUL-12	18.1	08-JUL-12	78	08-JUL-12	31	08-JUL-12	318	08-JUL-12	9999999	09-JUL-12	1.58	Y	2.89591	2.89591	0.457425	0.457425	1.00063	1.00063	32.0758	32.0758	34.6908	35
0896564	08-APR-12	10-APR-12	6	05-AUG-16	133	05-AUG-16	138	05-AUG-16	0.88	05-AUG-16	9999999	15-AUG-16	35	05-AUG-16	19	05-AUG-16	124	05-AUG-16	3.9	28-OCT-14	1.13		16.1181	16.1181	0.122218	0.122218	1	-0.127833	78.2952	40	40	40
2069676	28-OCT-14	06-NOV-14	4.1	24-NOV-14	118	24-NOV-14	140	24-NOV-14	1.31	24-NOV-14	0.5	23-NOV-14	22	23-NOV-14	11	23-NOV-14	118	23-NOV-14	2	23-NOV-14	1.14	Y	1	-0.693147	0.131028	0.131028	0.270027	0.270027	14.2617	14.2617	11.7136	12	5	1	0	1	1	6	51	3	0	0	0	0	1	1	1	0
1053229	30-APR-15	03-MAY-15	7.3	03-MAY-15	116	03-MAY-15	131	03-MAY-15	0.71	03-MAY-15	1.7	03-MAY-15	68	03-MAY-15	39	03-MAY-15	103	03-MAY-15	2.3	03-MAY-15	1.36	Y	0.530628	0.530628	0.307485	0.307485	1	-0.34249	21.4496	21.4496	25.1226	25	2	0	0	0	1	3	10	1	0	0	1	0	1	1	1	0
1721508	03-JUL-15	16-JUL-15	7.8	15-JUL-15	200	15-JUL-15	141	15-JUL-15	0.82	15-JUL-15	0.6	15-JUL-15	18	15-JUL-15	9	15-JUL-15	95	15-JUL-15	1.7	15-JUL-15	1.11		1	-0.510826	0.10436	0.10436	1	-0.198451	20.9488	20.9488	18.4341	18	1	0	1	0	1	5	29	3	1	0	1	0	0	0	1	0
1261364	09-JUN-10	11-JUN-10	6.6	01-AUG-10	9999999	01-AUG-10	137	01-AUG-10	0.55	01-AUG-10	9999999	27-JUL-10	16	27-JUL-10	10	27-JUL-10	120	27-JUL-10	2.4	27-JUL-10	0.98		16.1181	16.1181	-0.0202027	-0.0202027	1	-0.597837	76.7001	40	40	40
1889323	29-JUL-10	05-AUG-10	4.2	05-AUG-10	81	05-AUG-10	135	05-AUG-10	0.85	05-AUG-10	1.9	05-AUG-10	54	05-AUG-10	35	05-AUG-10	92	05-AUG-10	3	05-AUG-10	1.29	Y	0.641854	0.641854	0.254642	0.254642	1	-0.162519	21.2782	21.2782	22.5138	23
1486795	22-JUL-10	05-AUG-10	21.4	04-AUG-10	9999999	04-AUG-10	123	04-AUG-10	4.43	04-AUG-10	8.6	31-JUL-10	156	31-JUL-10	53	31-JUL-10	707	31-JUL-10	1.5	31-JUL-10	7.18	Y	2.15176	2.15176	1.9713	1.9713	1.4884	1.4884	50.8862	40	40	40
8112344	18-OCT-11	22-OCT-11	6.3	22-OCT-11	9999999	22-OCT-11	131	22-OCT-11	1.69	22-OCT-11	19.1	22-OCT-11	37	22-OCT-11	34	22-OCT-11	50	22-OCT-11	3.1	22-OCT-11	3.51	Y	2.94969	2.94969	1.25562	1.25562	0.524729	0.524729	36.6644	36.6644	37.3248	37
0966690	26-APR-12	28-APR-12	14.7	28-APR-12	83	28-APR-12	133	28-APR-12	0.44	28-APR-12	9999999	26-APR-12	42	26-APR-12	31	26-APR-12	366	26-APR-12	2.1	26-APR-12	1.22	Y	16.1181	16.1181	0.198851	0.198851	1	-0.820981	79.1535	40	40	40
1313637	11-JUL-12	18-JUL-12	3	18-JUL-12	9999999	18-JUL-12	130	18-JUL-12	1.94	18-JUL-12	6.9	18-JUL-12	60	18-JUL-12	20	18-JUL-12	59	18-JUL-12	2.3	18-JUL-12	2.50	Y	1.93152	1.93152	0.916291	0.916291	0.662688	0.662688	30.3355	30.3355	32.568	33
2065042	21-JUL-12	23-JUL-12	7	31-AUG-12	84	31-AUG-12	136	31-AUG-12	0.62	31-AUG-12	1.4	31-AUG-12	43	31-AUG-12	25	31-AUG-12	85	31-AUG-12	3	31-AUG-12	1.88	Y	0.336472	0.336472	0.631272	0.631272	1	-0.478036	24.3421	24.3421	24.8588	25
0828236	04-FEB-13	09-FEB-13	6.7	08-FEB-13	80	08-FEB-13	137	09-FEB-13	1.79	09-FEB-13	1.2	08-FEB-13	62	08-FEB-13	27	08-FEB-13	238	08-FEB-13	1.5	08-FEB-13	2.18	Y	0.182322	0.182322	0.779325	0.779325	0.582216	0.582216	21.4194	21.4194	21.4194	21	2	1	1	0	0	4	17	3	0	0	0	0	1	1	1	0	1
1404207	22-NOV-13	03-DEC-13	7.4	02-DEC-13	119	02-DEC-13	133	06-FEB-14	3.85	06-FEB-14	3.1	06-FEB-14	35	06-FEB-14	19	06-FEB-14	175	06-FEB-14	2.2	06-FEB-14	1.59	Y	1.1314	1.1314	0.463734	0.463734	1.34807	1.34807	28.8016	28.8016	30.2798	30	1	0	0	0	0	1	11	0	0	0	1	0	1	0	1	0
0695250	12-MAY-13	17-MAY-13	14.7	13-DEC-13	54	13-DEC-13	147	13-DEC-13	1.02	13-DEC-13	0.6	11-DEC-13	40	11-DEC-13	24	11-DEC-13	283	11-DEC-13	2.3	11-DEC-13	1.96		1	-0.510826	0.672944	0.672944	0.0198026	0.0198026	17.9365	17.9365	10.6555	11	2	1	0	0	0	2	8	0	0	0	1	0	1	1	1	1
0182866	17-DEC-13	19-DEC-13	8.2	18-DEC-13	51	18-DEC-13	133	18-DEC-13	1.11	18-DEC-13	6.1	18-DEC-13	80	18-DEC-13	46	18-DEC-13	100	18-DEC-13	1.4	18-DEC-13	1.74		1.80829	1.80829	0.553885	0.553885	0.10436	0.10436	20.4676	20.4676	23.0459	23	2	0	0	0	0	2	4	0	0	0	0	0	1	1	1	0
0277189	07-SEP-14	19-SEP-14	42.8	21-SEP-14	77	21-SEP-14	136	21-SEP-14	4.09	21-SEP-14	2.7	21-SEP-14	1419	21-SEP-14	385	21-SEP-14	142	21-SEP-14	3.6	21-SEP-14	1.68	Y	0.993252	0.993252	0.518794	0.518794	1.40854	1.40854	29.4748	29.4748	29.8221	30	1	0	0	0	1	13	86	6	6	0	1	0	1		1	0
0399482	19-FEB-15	10-MAR-15	14.3	06-MAR-15	140	06-MAR-15	129	08-MAR-15	3.19	08-MAR-15	4.3	25-FEB-15	30	25-FEB-15	36	25-FEB-15	121	25-FEB-15	2.9	25-FEB-15	1.12		1.45862	1.45862	0.113329	0.113329	1.16002	1.16002	24.3142	24.3142	28.4553	28	3	1	1	0	1	2	29	0	0	0	1	0	1			0
0310135	31-MAY-15	03-JUN-15	9.2	21-OCT-15	95	21-OCT-15	130	21-OCT-15	0.93	21-OCT-15	14.4	21-OCT-15	100	21-OCT-15	47	21-OCT-15	70	21-OCT-15	2	21-OCT-15	2.68	Y	2.66723	2.66723	0.985817	0.985817	1	-0.0725707	37.1233	37.1233	37.7878	38	1	0	0	1	1	8	37	3	3	0	0	0	1	1	1	1
0386718	30-AUG-15	04-SEP-15	6.4	20-AUG-16	129	20-AUG-16	137	20-AUG-16	2.09	20-AUG-16	0.6	20-AUG-16	31	20-AUG-16	22	20-AUG-16	37	20-AUG-16	3.3	20-NOV-15	1.71	Y	1	-0.510826	0.536493	0.536493	0.737164	0.737164	23.2734	23.2734	23.2734	23	3	0	1	0	1	16	124	7	3	0	0	0	1	0	1	0
8074704	10-APR-14	16-APR-14	13.5	12-FEB-16	18	12-FEB-16	136	12-FEB-16	3.25	12-FEB-16	6.6	12-FEB-16	116	12-FEB-16	142	12-FEB-16	47	12-FEB-16	2.4	30-DEC-15	1.23	Y	1.88707	1.88707	0.207014	0.207014	1.17865	1.17865	27.1614	27.1614	27.5851	28	1	1	1	1	1	9	46	3	3	0	1	0	0	0	1	0
0658132	25-NOV-08	2008-11-27	4.1	27-NOV-08	9999999	27-NOV-08	133	26-NOV-08	0.85	26-NOV-08	9999999	25-NOV-08											16.1181	16.1181	1	#NUM!	1	-0.162519	88.1264	40	40	40
0207773	06-JAN-09	09-JAN-09	14	08-JAN-09	9999999	08-JAN-09	158	08-JAN-09	10.88	08-JAN-09	25.5	08-JAN-09	2288	08-JAN-09	361	08-JAN-09	222	08-JAN-09	1.1	08-JAN-09	1.53	Y	3.23868	3.23868	0.425268	0.425268	2.38693	2.38693	46.2781	40	40	40
2062004	15-JAN-11	15-JAN-11	8.2	15-JAN-11	9999999	15-JAN-11	147	18-JAN-11	1.26	15-JAN-11											2.04	Y	1	#NUM!	0.71295	0.71295	0.231112	0.231112	20.4068	20.4068	13.941	14
1958280	27-JUN-11	29-JUN-11	2.2	29-JUN-11	81	29-JUN-11	139	29-JUN-11	0.88	29-JUN-11	1.2	29-JUN-11	107	29-JUN-11	69	29-JUN-11	87	29-JUN-11	2.8	29-JUN-11	1.27		0.182322	0.182322	0.239017	0.239017	1	-0.127833	19.3662	19.3662	18.0043	18
2094998	01-AUG-11	04-AUG-11	21.3	04-AUG-11	237	04-AUG-11	134	04-AUG-11	0.51	04-AUG-11	9999999	01-AUG-11	218	01-AUG-11	47	01-AUG-11	308	01-AUG-11	9999999	02-AUG-11	1.30	Y	16.1181	16.1181	0.262364	0.262364	1	-0.673345	79.8649	40	40	40
0469434	07-JAN-12	16-JAN-12	1.8	16-JAN-12	9999999	16-JAN-12	133	16-JAN-12	0.52	16-JAN-12	2.2	16-JAN-12	80	16-JAN-12	44	16-JAN-12	87	16-JAN-12	2.5	16-JAN-12	1.57	Y	0.788457	0.788457	0.451076	0.451076	1	-0.653926	24.0324	24.0324	26.1401	26
2070315	18-FEB-12	27-FEB-12	5.6	17-MAY-12	123	17-MAY-12	153	17-MAY-12	2.39	17-MAY-12	0.8	17-MAY-12	48	17-MAY-12	54	17-MAY-12	171	17-MAY-12	3.4	17-MAY-12	0.90	Y	1	-0.223144	-0.105361	-0.105361	0.871293	0.871293	17.3682	17.3682	5.41867	5
1898243	09-JUN-12	11-JUN-12	4.2	11-JUN-12	135	11-JUN-12	138	11-JUN-12	0.9	11-JUN-12	0.8	11-JUN-12	84	11-JUN-12	47	11-JUN-12	116	11-JUN-12	2.5	11-JUN-12	1.01	Y	1	-0.223144	0.00995033	0.00995033	1	-0.105361	19.8914	19.8914	19.2279	19
2230339	11-APR-13	12-APR-13	12.9	12-APR-13	245	12-APR-13	139	12-APR-13	1.02	12-APR-13	1.7	12-APR-13	274	12-APR-13	301	12-APR-13	231	12-APR-13	2.8	12-APR-13	1.68	Y	0.530628	0.530628	0.518794	0.518794	0.0198026	0.0198026	14.4358	14.4358	12.7485	13
0848545	19-MAY-11	22-MAY-11	3.2	25-NOV-13	50	25-NOV-13	136	25-NOV-13	0.95	25-NOV-13	31.4	25-NOV-13	96	25-NOV-13	43	25-NOV-13	66	25-NOV-13	1.6	25-NOV-13	2.26	Y	3.44681	3.44681	0.815365	0.815365	1	-0.0512933	38.161	38.161	38.2217	38	1	1	0	0		1	20	0	0	0			1	1	1	0	1
2271549	06-JAN-14	08-JAN-14	3	08-JAN-14	55	08-JAN-14	131	08-JAN-14	0.58	08-JAN-14	0.7	08-JAN-14	39	08-JAN-14	23	08-JAN-14	87	08-JAN-14	2.4	08-JAN-14	1.36	Y	1	-0.356675	0.307485	0.307485	1	-0.544727	23.2238	23.2238	26.5455	27	1	0	0	0	1	4	40	2	1	0	0	0	1	1	1	0
1783076	08-SEP-14	16-SEP-14	4.5	16-SEP-14	76	16-SEP-14	131	16-SEP-14	0.55	16-SEP-14	2.6	16-SEP-14	67	16-SEP-14	51	16-SEP-14	86	16-SEP-14	2.3	16-SEP-14	1.31	Y	0.955511	0.955511	0.270027	0.270027	1	-0.597837	22.6361	22.6361	26.0742	26	1	0	0	0	1	1	8	0	0	0	0	0	1	1	1	0
2224590	15-OCT-14	22-OCT-14	6.4	20-OCT-14	117	20-OCT-14	130	22-OCT-14	1.04	22-OCT-14	4.1	15-OCT-14	74	15-OCT-14	25	15-OCT-14	70	15-OCT-14	1.9	15-OCT-14	1.36	Y	1.41099	1.41099	0.307485	0.307485	0.0392207	0.0392207	15.5827	15.5827	21.2231	21	1	0	0	0	1	3	53	0	1	0	1	0	1		1	0
0409493	14-JAN-11	16-JAN-11	3.2	27-NOV-14	30	27-NOV-14	139	27-NOV-14	4.58	27-NOV-14	42	27-NOV-14	125	27-NOV-14	60	27-NOV-14	82	27-NOV-14	2.9	27-NOV-14	2.86	Y	3.73767	3.73767	1.05082	1.05082	1.5217	1.5217	46.8903	40	40	40	1	0	0	0	1	6	28	2	3	0	1	0	1	1	1	0	1
7129589	21-DEC-15	24-DEC-15	6.7	24-DEC-15	80	27-DEC-15	132	24-DEC-15	0.5	24-DEC-15	3.8	24-DEC-15	30	24-DEC-15	38	24-DEC-15	134	24-DEC-15	2.4	24-DEC-15	1.61	Y	1.335	1.335	0.476234	0.476234	1	-0.693147	26.3801	26.3801	28.6274	29	2	1	0	0	0	1	3	0	0	0	0	0	1	1	0	0
1561735	12-DEC-09	13-DEC-09	8.7	13-DEC-09	9999999	13-DEC-09	127	13-DEC-09	3.96	13-DEC-09	9999999	13-DEC-09	175	12-DEC-09	91	12-DEC-09	155	12-DEC-09	0.9	12-DEC-09	1.54	Y	16.1181	16.1181	0.431782	0.431782	1.37624	1.37624	85.363	40	40	40
2047817	27-NOV-10	18-DEC-10	14.4	15-DEC-10	98	15-DEC-10	139	15-DEC-10	3.71	15-DEC-10	9999999	15-DEC-10	37	12-DEC-10	17	12-DEC-10	303	12-DEC-10	1.9	12-DEC-10	1.75	Y	16.1181	16.1181	0.559616	0.559616	1.31103	1.31103	86.1707	40	40	40
8197741	08-JAN-13	14-JAN-13	6.8	28-FEB-14	140	28-FEB-14	131	28-FEB-14	0.8	28-FEB-14	0.8	28-FEB-14	19	28-FEB-14	15	28-FEB-14	35	28-FEB-14	3.9	28-FEB-14	2.20	Y	1	-0.223144	0.788457	0.788457	1	-0.223144	28.6107	28.6107	30.8658	31	1	1	1	0	1	1	6	0	0	0	0	0	1	1	1	0
0949673	16-JAN-11	20-JAN-11	6.6	19-JAN-11	160	19-JAN-11	134	19-JAN-11	3.06	19-JAN-11	9999999	16-JAN-11	27	16-JAN-11	11	16-JAN-11	41	16-JAN-11	1.8	17-JAN-11	1.29	Y	16.1181	16.1181	0.254642	0.254642	1.11841	1.11841	80.9116	40	40	40
1367666	07-JUL-09	11-JUL-09	5.5	05-DEC-12	118	05-DEC-12	135	05-DEC-12	0.96	05-DEC-12	1.5	05-DEC-12	57	05-DEC-12	33	05-DEC-12	91	05-DEC-12	2.4	05-DEC-12	1.19	Y	0.405465	0.405465	0.173953	0.173953	1	-0.040822	19.4809	19.4809	20.8352	21
2040435	27-FEB-13	11-MAR-13	2.3	09-MAR-13	96	09-MAR-13	130	09-MAR-13	1.02	09-MAR-13	1.9	07-MAR-13	32	07-MAR-13	15	07-MAR-13	80	07-MAR-13	2	08-MAR-13	1.20	Y	0.641854	0.641854	0.182322	0.182322	0.0198026	0.0198026	11.0877	11.0877	17.7665	18	1	0	0	0	1	1	12	0	0	0	1	0	1	0	1	0
0889515	16-MAY-09	23-MAY-09	5.7	12-JUN-13	71	12-JUN-13	136	12-JUN-13	0.57	12-JUN-13	4.1	12-JUN-13	83	12-JUN-13	32	12-JUN-13	187	12-JUN-13	2.2	12-JUN-13	1.76	Y	1.41099	1.41099	0.565314	0.565314	1	-0.562119	27.665	27.665	28.0721	28	2	0	1	0	0	1	30	0	0	0	0	1	1		0	0
8064242	24-FEB-12	29-FEB-12	9.5	04-OCT-13	608	04-OCT-13	136	04-OCT-13	1.27	04-OCT-13	2.7	04-OCT-13	142	04-OCT-13	165	04-OCT-13	410	04-OCT-13	2.6	04-OCT-13	1.33	Y	0.993252	0.993252	0.285179	0.285179	0.239017	0.239017	15.6659	15.6659	16.4689	16	1	1	0			1	2	0	0	0	0	1	0	0	0	1
1147522	02-OCT-08	03-OCT-08	4.8	29-JAN-14	72	29-JAN-14	135	17-APR-14	1.02	17-APR-14	2.3	17-APR-14	38	17-APR-14	29	17-APR-14	171	17-APR-14	3.1	17-APR-14	1.25	Y	0.832909	0.832909	0.223144	0.223144	0.0198026	0.0198026	12.2671	12.2671	14.0975	14
2297960	08-MAY-14	17-MAY-14	5.8	23-MAY-14	155	23-MAY-14	135	23-MAY-14	0.68	23-MAY-14	4.7	24-MAY-14	39	23-MAY-14	22	23-MAY-14	71	23-MAY-14	3	23-MAY-14	1.64	Y	1.54756	1.54756	0.494696	0.494696	1	-0.385662	27.3904	27.3904	28.2226	28	1	0	0	0	0	3	20	1	1	0	0	0	1	1	1	0	0
2307924	23-JUN-14	24-JUN-14	6.9	23-JUN-14	79	23-JUN-14	134	24-JUN-14	1.21	24-JUN-14	7.1	23-JUN-14	90	23-JUN-14	77	23-JUN-14	104	23-JUN-14	2.9	23-JUN-14	1.60		1.96009	1.96009	0.470004	0.470004	0.19062	0.19062	20.9274	20.9274	22.8156	23	1	0	0	0	1	1	1	0	0	0	0	0	1		1	0
1604339	27-MAR-13	30-MAR-13	3.9	24-MAY-15	21	24-MAY-15	143	25-MAY-15	2.43	25-MAY-15	34	24-MAY-15	60	24-MAY-15	34	24-MAY-15	47	24-MAY-15	2.6	24-MAY-15	1.62	Y	3.52636	3.52636	0.482426	0.482426	0.887891	0.887891	33.6599	33.6599	32.4046	32	1	0	1	1	0	5	67	0	1	0	1	0	0		1	0
0869781	08-DEC-15	11-DEC-15	4	16-AUG-16	112	16-AUG-16	139	15-AUG-16	0.97	15-AUG-16	0.6	15-AUG-16	22	15-AUG-16	21	15-AUG-16	106	15-AUG-16	2.3	16-DEC-15	1.79	Y	1	-0.510826	0.582216	0.582216	1	-0.0304592	26.3008	26.3008	25.3967	25	1	1	0		1	13	60	4	4	1	0	0	1	1	1	0	1
1663415	16-AUG-08	13-OCT-08	6.1	13-OCT-08	9999999	13-OCT-08	133	13-OCT-08	0.77	13-OCT-08	20.2	13-OCT-08	64	13-OCT-08	39	13-OCT-08	100	13-OCT-08	2.3	13-OCT-08	2.08	Y	3.00568	3.00568	0.732368	0.732368	1	-0.261365	35.564	35.564	36.1496	36
1094888	07-AUG-08	11-AUG-08	3.7	23-JAN-09	90	23-JAN-09	140	23-JAN-09	0.85	23-JAN-09	1.7	23-JAN-09	38	23-JAN-09	27	23-JAN-09	197	23-JAN-09	2.9	23-JAN-09	1.32	Y	0.530628	0.530628	0.277632	0.277632	1	-0.162519	21.1153	21.1153	19.2457	19	4	1	0	0	1	6	19	3	1	0	0	0	1		0	0
1973639	02-MAR-09	06-MAR-09	4.8	05-MAR-09	9999999	05-MAR-09	151	06-MAR-09	2.52	06-MAR-09	9999999	05-MAR-09	49	05-MAR-09	27	05-MAR-09	116	05-MAR-09	1.4	05-MAR-09	2.13	Y	16.1181	16.1181	0.756122	0.756122	0.924259	0.924259	84.6701	40	40	40
1923247	02-APR-09	09-APR-09	6.9	08-APR-09	9999999	08-APR-09	139	08-APR-09	1.04	08-APR-09	17.9	08-APR-09	63	08-APR-09	25	08-APR-09	83	08-APR-09	2.8	08-APR-09	3.07	Y	2.8848	2.8848	1.12168	1.12168	0.0392207	0.0392207	30.2727	30.2727	29.6307	30
2074588	12-MAR-11	14-MAR-11	10.3	14-MAR-11	9999999	14-MAR-11	141	14-MAR-11	0.49	14-MAR-11	19	14-MAR-11	116	14-MAR-11	33	14-MAR-11	151	14-MAR-11	1.6	14-MAR-11	1.58		2.94444	2.94444	0.457425	0.457425	1	-0.71335	32.2531	32.2531	31.2306	31
0873501	03-JUL-11	07-JUL-11	10.2	07-JUL-11		07-JUL-11	135	07-JUL-11	0.7	07-JUL-11	2.6	05-JUL-11	69	05-JUL-11	14	05-JUL-11	64	05-JUL-11	2.8	05-JUL-11	1.51	Y	0.955511	0.955511	0.41211	0.41211	1	-0.356675	24.2275	24.2275	25.2684	25
0346336	21-FEB-12	23-FEB-12	6.6	22-FEB-12	203	22-FEB-12	135	22-FEB-12	0.52	22-FEB-12	9999999	21-FEB-12	146	21-FEB-12	110	21-FEB-12	384	21-FEB-12	2.8	21-FEB-12	1.14	Y	16.1181	16.1181	0.131028	0.131028	1	-0.653926	78.3939	40	40	40
8165998	28-FEB-12	02-MAR-12	2.3	02-MAR-12	46	02-MAR-12	135	02-MAR-12	0.93	02-MAR-12	9999999	29-FEB-12	261	29-FEB-12	151	29-FEB-12	88	29-FEB-12	2.4	29-FEB-12	1.37	Y	16.1181	16.1181	0.314811	0.314811	1	-0.0725707	80.4523	40	40	40
1174095	15-MAY-13	17-MAY-13	7.5	17-MAY-13	133	17-MAY-13	134	17-MAY-13	0.95	17-MAY-13	26.7	17-MAY-13	279	17-MAY-13	166	17-MAY-13	127	17-MAY-13	1.8	17-MAY-13	1.80		3.28466	3.28466	0.587787	0.587787	1	-0.0512933	34.9992	34.9992	35.4943	35	1	1	0	0	1	2	9	1	0	0	0	0	0	0	0	0
8119318	06-FEB-14	09-FEB-14	5.1	22-MAY-14	27	22-MAY-14	135	22-MAY-14	1.01	22-MAY-14	2.7	22-MAY-14	161	21-MAY-14	41	21-MAY-14	109	21-MAY-14	2.3	21-MAY-14	1.31	Y	0.993252	0.993252	0.270027	0.270027	0.00995033	0.00995033	13.304	13.304	15.066	15	1	1	0	0	0	4	12	0	0	0	0	0	1	1	1	0	1
0176262	27-MAY-14	02-JUN-14	7.9	02-JUN-14	41	02-JUN-14	138	02-JUN-14	2.52	02-JUN-14	6	27-MAY-14	38	27-MAY-14	27	27-MAY-14	67	27-MAY-14	2.1	27-MAY-14	1.92	Y	1.79176	1.79176	0.652325	0.652325	0.924259	0.924259	29.3541	29.3541	29.0027	29	2	0	0	0	0	2	9	1	0	0	1	0	1	1	1	0	1
1705945	22-DEC-08	24-DEC-08	6.6	24-NOV-14	186	24-NOV-14	139	24-NOV-14	1.5	24-NOV-14	0.5	24-NOV-14	17	24-NOV-14	11	24-NOV-14	34	24-NOV-14	4.4	24-NOV-14		Y	1	-0.693147	1	#NUM!	0.405465	0.405465	25.2903	25.2903	24.3195	24	4									1
1386923	12-MAY-15	13-MAY-15	7.8	13-MAY-15	172	13-MAY-15	138	13-MAY-15	1.06	13-MAY-15	9999999	05-MAY-15	30	05-MAY-15	25	05-MAY-15	56	05-MAY-15	4.1	05-MAY-15	1.01		16.1181	16.1181	0.00995033	0.00995033	0.0582689	0.0582689	68.0255	40	40	40
2089959	06-JUN-15	08-JUN-15	3.6	08-JUN-15	50	08-JUN-15	137	08-JUN-15	0.96	08-JUN-15	4.9	06-JUN-15	56	06-JUN-15	30	06-JUN-15	97	06-JUN-15	3.1	06-JUN-15	1.35		1.58924	1.58924	0.300105	0.300105	1	-0.040822	25.3685	25.3685	25.3685	25	0	0	0	0	1	1	2	0	0	0	0	0	1	1	1	0	1
8221950	28-JAN-14	01-FEB-14	10.5	02-AUG-16	210	02-AUG-16	137	02-AUG-16	0.76	02-AUG-16	0.6	02-AUG-16	26	02-AUG-16	15	02-AUG-16	129	02-AUG-16	3.6	08-DEC-15	0.96		1	-0.510826	-0.040822	-0.040822	1	-0.274437	19.3228	19.3228	19.3228	19	1	0	0	0	1	2	11	0	0	0	1	0	1	0	1	1
0532171	25-DEC-15	26-JAN-16	8.9	20-JAN-16	24	20-JAN-16	148	21-JAN-16	0.99	21-JAN-16	10.2	18-JAN-16	58	18-JAN-16	34	18-JAN-16	76	18-JAN-16	3.3	31-DEC-15	1.95	Y	2.32239	2.32239	0.667829	0.667829	1	-0.0100503	32.2583	32.2583	29.4481	29	2	0	1	0	1	8	129	5	1	0	0	0	1	1	1	0	0
0319995	10-JUL-08	23-JUL-08	11.6	19-JUL-08	333	19-JUL-08	131	22-JUL-08	0.95	22-JUL-08	3.7	13-JUL-08	132	13-JUL-08	38	13-JUL-08	410	13-JUL-08	1.5	19-JUL-08	1.61	Y	1.30833	1.30833	0.476234	0.476234	1	-0.0512933	26.2793	26.2793	28.996	29
1774009	20-SEP-08	26-SEP-08	5.9	26-SEP-08	60	26-SEP-08	134	26-SEP-08	1.54	26-SEP-08	2.7	26-SEP-08	87	26-SEP-08	47	26-SEP-08	213	26-SEP-08	1.7	26-SEP-08	1.27	Y	0.993252	0.993252	0.239017	0.239017	0.431782	0.431782	16.9936	16.9936	19.2713	19
1949380	04-NOV-08	22-NOV-08	10.3	02-DEC-08	106	02-DEC-08	130	02-DEC-08	1.88	02-DEC-08	1	02-DEC-08	26	02-DEC-08	14	02-DEC-08	100	02-DEC-08	9999999	02-DEC-08	1.77	Y	0	0	0.57098	0.57098	0.631272	0.631272	18.8662	18.8662	23.7481	24
1080081	01-FEB-09	18-FEB-09	6.8	12-FEB-09	94	12-FEB-09	133	17-FEB-09	8.2	17-FEB-09	2.3	12-FEB-09	176	12-FEB-09	47	12-FEB-09	448	12-FEB-09	3.1	12-FEB-09	1.09		0.832909	0.832909	0.0861777	0.0861777	2.10413	2.10413	30.6802	30.6802	31.9104	32
8196579	21-APR-09	24-APR-09	22.2	13-MAY-09	9999999	13-MAY-09	125	13-MAY-09	5.22	13-MAY-09	24.2	13-MAY-09	64	13-MAY-09	42	13-MAY-09	95	13-MAY-09	9999999	13-MAY-09	2.35	Y	3.18635	3.18635	0.854415	0.854415	1.6525	1.6525	43.8583	40	40	40
0428911	14-JUL-09	18-AUG-09	26.5	15-AUG-09	9999999	15-AUG-09	133	15-AUG-09	1.55	15-AUG-09	1	13-AUG-09	100	13-AUG-09	58	13-AUG-09	240	13-AUG-09	1.6	13-AUG-09	1.44	Y	0	0	0.364643	0.364643	0.438255	0.438255	14.7081	14.7081	18.0466	18
0461745	03-FEB-10	04-FEB-10	8.8	13-MAR-10	117	13-MAR-10	144	13-MAR-10	0.82	13-MAR-10	4.5	13-MAR-10	53	13-MAR-10	28	13-MAR-10	92	13-MAR-10	3	13-MAR-10	1.30	Y	1.50408	1.50408	0.262364	0.262364	1	-0.198451	24.6239	24.6239	21.072	21
1771056	22-NOV-10	20-DEC-10	6.2	19-MAY-11	245	19-MAY-11	138	18-MAY-11	1.41	18-MAY-11	0.5	16-DEC-10	42	16-DEC-10	25	16-DEC-10	51	16-DEC-10	2	16-DEC-10	1.16	Y	1	-0.693147	0.14842	0.14842	0.34359	0.34359	15.1605	15.1605	14.3408	14
1811223	10-JUL-11	21-JUL-11	4.5	03-SEP-11	9999999	03-SEP-11	137	03-SEP-11	500	08-SEP-11	3	31-AUG-11	33	31-AUG-11	26	31-AUG-11	71	31-AUG-11	1.7	31-AUG-11	1.81	Y	1.09861	1.09861	0.593327	0.593327	6.21461	6.21461	76.7018	40	40	40
1851004	24-SEP-12	11-OCT-12	10.3	11-OCT-12	421	11-OCT-12	132	11-OCT-12	0.84	11-OCT-12	0.6	11-OCT-12	22	11-OCT-12	11	11-OCT-12	103	11-OCT-12	2	11-OCT-12	2.55	Y	1	-0.510826	0.936093	0.936093	1	-0.174353	30.2642	30.2642	31.8706	32
2293343	05-FEB-14	09-FEB-14	5.1	31-MAR-14	180	31-MAR-14	132	31-MAR-14	0.84	31-MAR-14	1.3	31-MAR-14	52	31-MAR-14	28	31-MAR-14	285	31-MAR-14	2.9	31-MAR-14	1.23		0.262364	0.262364	0.207014	0.207014	1	-0.174353	19.3103	19.3103	22.7241	23	2	0	0	0	0	1	4	0	0	0	0	0	1	0	1	1
1792829	24-JAN-14	27-JAN-14	33.4	13-FEB-14	13	13-FEB-14	135	13-FEB-14	2.47	13-FEB-14	21.6	13-FEB-14	73	13-FEB-14	29	13-FEB-14	144	13-FEB-14	3.9	13-FEB-14	2.63	Y	3.07269	3.07269	0.966984	0.966984	0.904218	0.904218	37.5284	37.5284	37.6915	38	1	0	0	0	0	10	32	5	3	0	1	0	1	0	1	0
0162071	18-APR-14	26-APR-14	13.5	23-JAN-15	28	23-JAN-15	131	23-JAN-15	1.58	23-JAN-15	0.9	17-JAN-15	13	17-JAN-15	8	17-JAN-15	42	17-JAN-15	2.2	17-JAN-15	2.37	Y	1	-0.105361	0.86289	0.86289	0.457425	0.457425	24.2519	24.2519	27.37	27	3	1	1	0	0	13	82	10	1	0	1	0	0	1	1	0
7021179	08-DEC-14	09-DEC-14	12.7	03-APR-15	305	03-APR-15	136	03-APR-15	0.8	03-APR-15	1.3	09-MAR-15	26	09-MAR-15	28	09-MAR-15	83	09-MAR-15	4.4	09-MAR-15	1.11		0.262364	0.262364	0.10436	0.10436	1	-0.223144	18.1606	18.1606	18.8813	19	1	0	0	0	1	2	9	1	0	0	0	0	0	0	1	0
1595879	29-APR-09	30-APR-09	5.1	09-MAR-16	164	09-MAR-16	138	09-MAR-16	3.16	04-MAR-16	0.6	28-FEB-16	21	28-FEB-16	13	28-FEB-16	115	28-FEB-16	3.5	22-MAY-15	1.22	Y	1	-0.510826	0.198851	0.198851	1.15057	1.15057	23.4481	23.4481	22.9019	23	1					12	99
8256025	22-OCT-14	28-OCT-14	5.8	04-JUN-16	68	04-JUN-16	136	03-JUN-16	0.77	03-JUN-16	1.1	03-JUN-16	40	03-JUN-16	21	03-JUN-16	145	03-JUN-16	3.2	25-NOV-15	1.20	Y	0.0953102	0.0953102	0.182322	0.182322	1	-0.261365	18.4023	18.4023	19.115	19	1	0	0	0	0	7	32	2	2	0	1	0	0	1	1	0	1
2199685	16-DEC-15	17-DEC-15	5.6	11-DEC-15	137	11-DEC-15	124	11-DEC-15	1.08	11-DEC-15	3.4	11-DEC-15	302	11-DEC-15	93	11-DEC-15	164	11-DEC-15	1	11-DEC-15	1.61		1.22378	1.22378	0.476234	0.476234	0.076961	0.076961	17.1262	17.1262	26.9391	27	2	1	0	0	0	4	10	0	3	0	0	0	0	0	1	1
0850770	22-MAY-08	27-MAY-08	10.9	21-JUL-08	9999999	21-JUL-08	139	21-JUL-08	2.04	21-JUL-08	5.3	21-JUL-08	35	21-JUL-08	28	21-JUL-08	59	21-JUL-08	1.7	21-JUL-08	2.14	Y	1.66771	1.66771	0.760806	0.760806	0.71295	0.71295	28.0779	28.0779	27.291	27
1960566	14-DEC-09	21-DEC-09	13.3	21-DEC-09	9999999	21-DEC-09	154	21-DEC-09	3.75	21-DEC-09	49.5	21-DEC-09	62	21-DEC-09	37	21-DEC-09	54	21-DEC-09	3.5	21-DEC-09	2.12	Y	3.90197	3.90197	0.751416	0.751416	1.32176	1.32176	42.2445	40	40	40
2027267	02-SEP-10	03-SEP-10	3.1	03-SEP-10	80	03-SEP-10	137	03-SEP-10	0.77	03-SEP-10	1.3	03-SEP-10	73	03-SEP-10	61	03-SEP-10	85	03-SEP-10	3	03-SEP-10	1.27		0.262364	0.262364	0.239017	0.239017	1	-0.261365	19.6687	19.6687	19.6687	20
1793138	19-DEC-10	23-DEC-10	7.1	22-DEC-10	91	22-DEC-10	136	23-DEC-10	2.41	23-DEC-10	9999999	19-DEC-10	77	19-DEC-10	27	19-DEC-10	103	19-DEC-10	9999999	19-DEC-10	1.50		16.1181	16.1181	0.405465	0.405465	0.879627	0.879627	80.3156	40	40	40
0665581	26-NOV-12	03-DEC-12	15.5	02-DEC-12	9999999	02-DEC-12	135	02-DEC-12	1.67	02-DEC-12	9999999	01-DEC-12	188	30-NOV-12	194	30-NOV-12	364	30-NOV-12	2.1	30-NOV-12	1.18		16.1181	16.1181	0.165514	0.165514	0.512824	0.512824	74.1179	40	40	40
2032102	15-FEB-13	16-MAR-13	4.2	16-MAR-13	106	16-MAR-13	136	16-MAR-13	1.53	16-MAR-13	1.3	06-MAR-13	33	06-MAR-13	23	06-MAR-13	140	06-MAR-13	1.5	06-MAR-13	1.13		0.262364	0.262364	0.122218	0.122218	0.425268	0.425268	12.8604	12.8604	13.756	14	1	1	1	0	0	3	67	2	0	0	0	0	1	0	1	0
0824344	05-FEB-13	07-FEB-13	20.4	01-APR-13	133	01-APR-13	128	01-APR-13	4.29	01-APR-13	3.5	01-APR-13	49	01-APR-13	32	01-APR-13	92	01-APR-13	2.4	01-APR-13	1.51	Y	1.25276	1.25276	0.41211	0.41211	1.45629	1.45629	29.7177	29.7177	32.7716	33	1	0	0	0	1	2	38	1	0	0	0	0	1	1	1	0	1
1768212	16-MAR-13	18-MAR-13	9.7	24-APR-13	116	24-APR-13	130	24-APR-13	0.94	24-APR-13	21.3	22-APR-13	308	22-APR-13	46	22-APR-13	103	22-APR-13	3.2	22-APR-13	2.00	Y	3.05871	3.05871	0.693147	0.693147	1	-0.0618754	35.3252	35.3252	36.405	36	1	0	0	1	1	2	20	1	0	0	0	0	1	1	1	1	1
2212866	12-MAR-14	16-MAR-14	16.5	14-MAR-14	83	14-MAR-14	131	14-MAR-14	5.18	14-MAR-14	7.9	14-MAR-14	36	14-MAR-14	23	14-MAR-14	79	14-MAR-14	2.9	14-MAR-14	1.30	Y	2.06686	2.06686	0.262364	0.262364	1.64481	1.64481	32.922	32.922	34.3234	34	2	0	0	0	1	3	11	1	1	0	0	0	1	0	1	1
1443436	06-MAR-14	13-MAR-14	3.8	27-AUG-15	260	27-AUG-15	130	22-SEP-15	1.44	22-SEP-15	1	27-AUG-15	73	27-AUG-15	19	27-AUG-15	84	27-AUG-15	1.1	27-AUG-15	1.09	Y	0	0	0.0861777	0.0861777	0.364643	0.364643	10.8848	10.8848	17.6104	18	1	0	0	0	1	1	7	0	0	0	0	0	0	0	0	0
1434288	21-MAY-12	24-MAY-12	13	31-AUG-15	454	31-AUG-15	137	31-AUG-15	0.87	31-AUG-15	2.2	31-AUG-15	81	31-AUG-15	90	31-AUG-15	160	31-AUG-15	3.8	31-AUG-15	2.25	Y	0.788457	0.788457	0.81093	0.81093	1	-0.139262	28.0628	28.0628	28.0628	28	1	0	0	0	1	3	18	0	1	0			1	0	1	0
2076586	26-JUN-15	29-JUN-15	6.7	22-MAR-16	123	22-MAR-16	139	22-MAR-16	0.77	22-MAR-16	1.1	22-MAR-16	24	22-MAR-16	16	22-MAR-16	89	22-MAR-16	3.7	13-DEC-15	1.13	Y	0.0953102	0.0953102	0.122218	0.122218	1	-0.261365	17.7291	17.7291	16.2592	16	2	0	0	0	0	7	35	2	2	0	0	0	0	0	0	0
2287947	03-OCT-15	04-OCT-15	3.3	04-OCT-15	81	04-OCT-15	134	04-OCT-15	0.51	04-OCT-15	1.6	04-OCT-15	33	04-OCT-15	26	04-OCT-15	93	04-OCT-15	3.3	04-OCT-15	1.14		0.470004	0.470004	0.131028	0.131028	1	-0.673345	19.2441	19.2441	21.299	21	1	1	1	1	1	1	2	0	0	0	0	0	1	1	1	0
1559228	14-JUL-14	04-AUG-14	4.6	09-JAN-16	152	09-JAN-16	136	09-JAN-16	3.26	09-JAN-16	4.3	04-JAN-16	17	04-JAN-16	8	04-JAN-16	339	04-JAN-16	2.5	28-DEC-15	1.47	Y	1.45862	1.45862	0.385262	0.385262	1.18173	1.18173	27.5676	27.5676	27.9779	28	1	0	1	0	0	5	83	0	1	0	1	0	0		1	0
1521933	03-AUG-08	11-AUG-08	6.4	07-JAN-09	9999999	07-JAN-09	146	07-JAN-09	8.32	07-JAN-09	9999999	31-DEC-08	11	30-DEC-08	17	30-DEC-08	134	30-DEC-08	2	30-DEC-08	1.36	Y	16.1181	16.1181	0.307485	0.307485	2.11866	2.11866	91.0758	40	40	40
0951413	15-APR-10	17-APR-10	5.5	19-MAR-10	108	19-MAR-10	137	19-MAR-10	2.4	19-MAR-10	9999999	02-JAN-10	43	02-JAN-10	15	02-JAN-10	106	02-JAN-10	1.7	02-JAN-10	1.31	Y	16.1181	16.1181	0.270027	0.270027	0.875469	0.875469	78.7589	40	40	40
1771105	23-APR-10	25-APR-10	6.2	24-MAY-10	201	24-MAY-10	128	24-MAY-10	1.76	24-MAY-10	3	24-MAY-10	106	24-MAY-10	51	24-MAY-10	520	24-MAY-10	2.1	24-MAY-10	1.21		1.09861	1.09861	0.19062	0.19062	0.565314	0.565314	18.1278	18.1278	24.6238	25
1917887	21-NOV-10	24-NOV-10	11.6	24-NOV-10	70	24-NOV-10	132	24-NOV-10	1.1	24-NOV-10	9999999	21-NOV-10	45	21-NOV-10	30	21-NOV-10	128	21-NOV-10	1.9	21-NOV-10	2.74	Y	16.1181	16.1181	1.00796	1.00796	0.0953102	0.0953102	79.5576	40	40	40
1579043	14-AUG-12	15-AUG-12	12.3	28-OCT-12	9999999	28-OCT-12	141	28-OCT-12	5.38	28-OCT-12	9999999	28-OCT-12	57	28-OCT-12	23	28-OCT-12	219	28-OCT-12	1.7	28-OCT-12	1.07	Y	16.1181	16.1181	0.0676586	0.0676586	1.68269	1.68269	84.2175	40	40	40
0720336	30-MAR-13	03-APR-13	15.3	02-APR-13	95	02-APR-13	126	02-APR-13	3.66	02-APR-13	19.1	02-APR-13	160	02-APR-13	61	02-APR-13	45	02-APR-13	2.1	02-APR-13	3.76	Y	2.94969	2.94969	1.32442	1.32442	1.29746	1.29746	44.83	40	40	40	1	1	0	0	1	2	6	1	0	0	1	0	0		1	0
8472660	18-JAN-12	20-JAN-12	4.8	26-APR-13	72	26-APR-13	130	26-APR-13	0.9	26-APR-13	1.8	25-APR-13	60	25-APR-13	22	25-APR-13	234	25-APR-13	2.9	25-APR-13	1.14	Y	0.587787	0.587787	0.131028	0.131028	1	-0.105361	19.6894	19.6894	24.3811	24	1	0	1	1	1	1	2	0	0	0	0	0	1	0	0	0
8073916	28-JAN-13	28-FEB-13	5.2	12-JUN-13	95	12-JUN-13	127	12-JUN-13	1.48	12-JUN-13	4.4	12-JUN-13	95	12-JUN-13	72	12-JUN-13	317	12-JUN-13	3.2	12-JUN-13		Y	1.4816	1.4816	1	#NUM!	0.392042	0.392042	26.9823	26.9823	31.2781	31	1	1	0	0	0	2	35	0	0	1	0	0	1		1	0
8028011	17-APR-14	25-APR-14	11.8	24-APR-14	74	24-APR-14	135	24-APR-14	0.24	24-APR-14	36.3	20-APR-14	91	19-APR-14	26	19-APR-14	356	19-APR-14	2.6	19-APR-14	1.50	Y	3.59182	3.59182	0.405465	0.405465	1	-1.42712	34.1183	34.1183	34.5065	35	5					2	28	1	0	0	1	0	1	1	1	0	1
1362333	02-DEC-13	22-DEC-13	15.9	13-AUG-14	226	13-AUG-14	128	13-AUG-14	1.12	13-AUG-14	1.1	13-AUG-14	91	13-AUG-14	16	13-AUG-14	514	13-AUG-14	2.2	13-AUG-14	1.26	Y	0.0953102	0.0953102	0.231112	0.231112	0.113329	0.113329	10.4633	10.4633	19.2357	19	1	0	0	0	1	1	20	0	0	0	0	0	1	1	1	0	1
1336695	04-OCT-12	12-OCT-12	4.8	04-SEP-15	95	04-SEP-15	152	06-SEP-15	0.91	06-SEP-15	0.8	06-SEP-15	47	06-SEP-15	75	06-SEP-15	167	06-SEP-15	2.4	06-SEP-15	1.18	Y	1	-0.223144	0.165514	0.165514	1	-0.0943107	21.6338	21.6338	12.5425	13	1	1	0	0	0	2	20	0	0	0	1	0	1	0	1	0
1638852	26-MAY-09	01-JUN-09	7	01-JUN-09	58	01-JUN-09	9999999	01-JUN-09	1.67	01-JUN-09	9999999	26-MAY-09	50	26-MAY-09	26	26-MAY-09	126	26-MAY-09	9999999	27-MAY-09	1.54	Y	16.1181	16.1181	0.431782	0.431782	0.512824	0.512824	77.1001	40	40	40
0314353	11-JUN-09	12-JUN-09	6.6	12-JUN-09	74	12-JUN-09	137	12-JUN-09	0.88	12-JUN-09	2.5	12-JUN-09	49	12-JUN-09	33	12-JUN-09	126	12-JUN-09	2.3	12-JUN-09	1.29		0.916291	0.916291	0.254642	0.254642	1	-0.127833	22.3156	22.3156	22.3156	22
0455412	26-APR-09	28-APR-09	24.5	26-MAR-11	9999999	26-MAR-11	138	26-MAR-11	1.99	26-MAR-11	1.9	26-MAR-11	171	26-MAR-11	63	26-MAR-11	88	26-MAR-11	2.3	26-MAR-11	2.04	Y	0.641854	0.641854	0.71295	0.71295	0.688135	0.688135	23.4267	23.4267	22.8798	23
1937465	23-MAR-12	27-MAR-12	2.9	27-MAR-12	37	27-MAR-12	130	27-MAR-12	1.82	27-MAR-12	9999999	24-MAR-12	36	24-MAR-12	19	24-MAR-12	184	24-MAR-12	2.7	24-MAR-12	1.26	Y	16.1181	16.1181	0.231112	0.231112	0.598837	0.598837	75.6757	40	40	40
1265762	09-JUN-12	19-JUN-12	3.6	07-AUG-15	104	07-AUG-15	137	07-AUG-15	0.8	07-AUG-15	9999999	09-JUL-13	19	13-JUN-12	9	13-JUN-12	44	13-JUN-12	1.9	13-JUN-12	1.09	Y	16.1181	16.1181	0.0861777	0.0861777	1	-0.223144	77.8916	40	40	40
1360823	22-MAR-13	25-MAR-13	5.1	25-MAR-13	42	25-MAR-13	132	25-MAR-13	0.6	25-MAR-13	2	25-MAR-13	103	25-MAR-13	75	25-MAR-13	157	25-MAR-13	2.3	25-MAR-13	1.18		0.693147	0.693147	0.165514	0.165514	1	-0.510826	20.4739	20.4739	23.6957	24	1	0	0	0	1	1	3	0	0	0	0	0	1	0	1	0
8205907	10-SEP-13	13-SEP-13	4.6	17-FEB-16	118	17-FEB-16	142	16-NOV-15	0.64	16-NOV-15	1	16-NOV-15	77	16-NOV-15	48	16-NOV-15	70	16-NOV-15	3.6	16-NOV-15	1.10	Y	0	0	0.0953102	0.0953102	1	-0.446287	17.0675	17.0675	13.2836	13	1	1	0	0	0	1	3	0	0	0	0	0	0	0	0	0
8136151	28-JUL-14	08-AUG-14	17.8	08-AUG-14	36	08-AUG-14	143	08-AUG-14	3.18	08-AUG-14	2.8	01-AUG-14	125	28-JUL-14	61	28-JUL-14	364	28-JUL-14	1.6	28-JUL-14	1.46	Y	1.02962	1.02962	0.378436	0.378436	1.15688	1.15688	25.6318	25.6318	22.7869	23	2	1	0		1	2	12	0	0	0	1	0	1		1	1
7014335	08-OCT-14	14-OCT-14	3.6	14-OCT-14	54	14-OCT-14	130	18-NOV-14	0.74	18-NOV-14	3	18-NOV-14	36	18-NOV-14	21	18-NOV-14	118	18-NOV-14	3.1	18-NOV-14	1.27		1.09861	1.09861	0.239017	0.239017	1	-0.301105	22.8297	22.8297	26.7961	27	4	1	1	0	1	1	6	0	0	0			0	0	1	0
7049860	23-JAN-15	31-JAN-15	5.1	31-JAN-15	70	31-JAN-15	131	31-JAN-15	0.72	31-JAN-15	3.3	29-JAN-15	69	29-JAN-15	45	29-JAN-15	159	29-JAN-15	3	30-JAN-15	1.67		1.19392	1.19392	0.512824	0.512824	1	-0.328504	26.2567	26.2567	28.9778	29	1	0	0			1	8	0	0	0	0	0	1		1	1
2237335	20-AUG-13	27-AUG-13	1.7	23-APR-15	59	23-APR-15	139	22-APR-15	0.63	22-APR-15	3.3	23-APR-15	62	23-APR-15	42	23-APR-15	116	23-APR-15	2.1	23-APR-15	1.32	Y	1.19392	1.19392	0.277632	0.277632	1	-0.462035	23.6225	23.6225	22.5416	23	1	0	0	1	1	7	50	3	0	0	0	0	1	0	0	0	0
0773029	23-OCT-15	23-OCT-15	3.8	23-JUL-16	198	23-JUL-16	135	23-JUL-16	0.55	23-JUL-16	1.8	21-JUL-16	54	21-JUL-16	46	21-JUL-16	108	21-JUL-16	3.3	23-OCT-15	1.16		0.587787	0.587787	0.14842	0.14842	1	-0.597837	19.8841	19.8841	21.2118	21
1589181	01-DEC-15	04-DEC-15	7.7	19-AUG-16	42	19-AUG-16	136	20-AUG-16	3.77	20-AUG-16	3.3	12-AUG-16	27	12-AUG-16	38	12-AUG-16	134	12-AUG-16	2.2	24-DEC-15	1.95	Y	1.19392	1.19392	0.667829	0.667829	1.32708	1.32708	31.1228	31.1228	31.4158	31	3	1	1	0	1	10	89	3	2	0	0	1	1	1	1	0
1447086	15-JAN-10	25-JAN-10	7.2	22-JAN-10	9999999	22-JAN-10	140	22-JAN-10	1.28	22-JAN-10	9999999	16-JAN-10	135	15-JAN-10	106	15-JAN-10	194	15-JAN-10	3.8	20-JAN-10	1.58	Y	16.1181	16.1181	0.457425	0.457425	0.24686	0.24686	74.842	40	40	40
1631425	29-MAR-10	30-MAR-10	2.3	30-MAR-10	9999999	30-MAR-10	134	30-MAR-10	0.58	30-MAR-10	9999999	30-MAR-10	76	29-MAR-10	57	29-MAR-10	54	29-MAR-10	2.5	29-MAR-10	1.52	Y	16.1181	16.1181	0.41871	0.41871	1	-0.544727	81.616	40	40	40
0871932	21-APR-10	29-APR-10	11.9	29-APR-10	9999999	29-APR-10	137	29-APR-10	2.69	29-APR-10	23.3	29-APR-10	129	29-APR-10	84	29-APR-10	85	29-APR-10	3.7	29-APR-10	2.61	Y	3.14845	3.14845	0.95935	0.95935	0.989541	0.989541	38.5458	38.5458	38.5458	39
2218273	11-JAN-13	12-JAN-13	4.1	23-FEB-13	44	23-FEB-13	139	23-FEB-13	0.66	23-FEB-13	2.8	23-FEB-13	114	23-FEB-13	48	23-FEB-13	160	23-FEB-13	2.5	23-FEB-13	1.42		1.02962	1.02962	0.350657	0.350657	1	-0.415515	23.8193	23.8193	22.7514	23	2	0	0	1	1	1	1	0	0	0	0	0	0	0	0	0
2285329	09-NOV-14	20-NOV-14	7.9	20-NOV-14	160	20-NOV-14	136	20-NOV-14	5.34	20-NOV-14	0.6	12-NOV-14	31	12-NOV-14	18	12-NOV-14	115	12-NOV-14	2.4	12-NOV-14	1.30	Y	1	-0.510826	0.262364	0.262364	1.67523	1.67523	29.1804	29.1804	29.5374	30
0398691	25-AUG-12	13-SEP-12	5.6	16-NOV-14	121	16-NOV-14	132	16-NOV-14	1.27	16-NOV-14	9999999	16-NOV-14	22	16-NOV-14	16	16-NOV-14	75	16-NOV-14	2.7	16-NOV-14	1.16		16.1181	16.1181	0.14842	0.14842	0.239017	0.239017	71.3061	40	40	40
1847278	21-JUL-10	06-JUN-11	6.5	30-DEC-14	429	30-DEC-14	138	30-DEC-14	1.56	30-DEC-14	0.6	26-AUG-13	21	26-AUG-13	13	26-AUG-13	83	26-AUG-13	3.5	26-AUG-13	1.02	Y	1	-0.510826	0.0198026	0.0198026	0.444686	0.444686	14.6874	14.6874	13.8521	14	1	0	0	1	1	1	3	0	0	0	0	0	0	0	0	0
1150294	20-APR-15	27-APR-15	1.9	24-APR-15	65	24-APR-15	138	23-APR-15	0.49	23-APR-15	0.9	20-APR-15	89	20-APR-15	54	20-APR-15	119	20-APR-15	3.8	20-APR-15	1.16	Y	1	-0.105361	0.14842	0.14842	1	-0.71335	21.4423	21.4423	20.8299	21	1	0	0	0	0	5	28	0	3	0	0	0	0	0	1	0
1877470	07-MAR-10	14-MAR-10	5.7	16-AUG-16	140	16-AUG-16	135	16-AUG-16	0.62	16-AUG-16	0.4	16-AUG-16	19	16-AUG-16	14	16-AUG-16	58	16-AUG-16	4.4	30-NOV-15	1.09	Y	1	-0.916291	0.0861777	0.0861777	1	-0.478036	20.7452	20.7452	22.016	22	1	0	0	1	1	4	30	0	2	0	0	0	0	0	1	0
1923380	11-APR-08	28-APR-08	17.7	27-APR-08	134	27-APR-08	139	27-APR-08	1.5	27-APR-08	16.2	27-APR-08	34	27-APR-08	14	27-APR-08	223	27-APR-08	2.3	27-APR-08	1.67	Y	2.78501	2.78501	0.512824	0.512824	0.405465	0.405465	26.5813	26.5813	25.6956	26
1802783	25-SEP-08	03-OCT-08	6.9	01-OCT-08	109	01-OCT-08	127	01-OCT-08	3.97	01-OCT-08	3.9	29-SEP-08	24	29-SEP-08	10	29-SEP-08	98	29-SEP-08	2.8	29-SEP-08	1.72		1.36098	1.36098	0.542324	0.542324	1.37877	1.37877	30.8433	30.8433	33.865	34
1916596	30-JAN-09	10-FEB-09	2	10-FEB-09	9999999	10-FEB-09	137	10-FEB-09	2.98	10-FEB-09	15.9	10-FEB-09	942	10-FEB-09	199	10-FEB-09	43	10-FEB-09	1.7	10-FEB-09	3.90	Y	2.76632	2.76632	1.36098	1.36098	1.09192	1.09192	42.5793	40	40	40
1800645	10-MAY-09	22-MAY-09	6.1	18-AUG-09	63	18-AUG-09	138	18-AUG-09	1.17	18-AUG-09	4	18-AUG-09	40	18-AUG-09	35	18-AUG-09	111	18-AUG-09	4.1	18-AUG-09	1.30		1.38629	1.38629	0.262364	0.262364	0.157004	0.157004	16.1112	16.1112	15.3229	15
1650491	17-DEC-08	19-DEC-08	3.3	07-AUG-09	9999999	07-AUG-09	125	07-AUG-09	1.77	07-AUG-09	8.4	07-AUG-09	48	07-AUG-09	28	07-AUG-09	107	07-AUG-09	2.6	07-AUG-09	1.91	Y	2.12823	2.12823	0.647103	0.647103	0.57098	0.57098	27.1865	27.1865	32.2607	32
2003554	18-SEP-09	19-SEP-09	5.4	19-SEP-09	93	19-SEP-09	140	19-SEP-09	0.65	19-SEP-09	9999999	18-SEP-09	61	18-SEP-09	38	18-SEP-09	105	18-SEP-09	2.6	18-SEP-09	1.18		16.1181	16.1181	0.165514	0.165514	1	-0.430783	78.7802	40	40	40
2012781	27-NOV-09	30-NOV-09	5.9	30-NOV-09	106	30-NOV-09	137	30-NOV-09	0.61	30-NOV-09	9999999	27-NOV-09	123	27-NOV-09	133	27-NOV-09	104	27-NOV-09	3.4	27-NOV-09	1.06		16.1181	16.1181	0.0582689	0.0582689	1	-0.494296	77.579	40	40	40
1714714	01-JAN-10	04-JAN-10	5	03-JAN-10	123	03-JAN-10	131	03-JAN-10	2.13	03-JAN-10	2.1	03-JAN-10	24	03-JAN-10	12	03-JAN-10	277	03-JAN-10	9999999	03-JAN-10	1.13		0.741937	0.741937	0.122218	0.122218	0.756122	0.756122	17.8394	17.8394	22.2272	22
1664748	31-DEC-08	23-JAN-09	7.1	11-MAR-10	191	11-MAR-10	133	06-MAR-10	0.55	06-MAR-10	0.5	08-JAN-10	26	08-JAN-10	14	08-JAN-10	159	08-JAN-10	3.1	08-JAN-10	1.12	Y	1	-0.693147	0.113329	0.113329	1	-0.597837	21.0493	21.0493	23.5508	24
0577029	24-OCT-10	31-OCT-10	10.2	28-OCT-10	80	28-OCT-10	146	28-OCT-10	3.39	28-OCT-10	4.4	28-OCT-10	30	28-OCT-10	14	28-OCT-10	144	28-OCT-10	1.8	28-OCT-10	1.39		1.4816	1.4816	0.329304	0.329304	1.22083	1.22083	27.402	27.402	23.6604	24
0535127	31-MAR-11	05-APR-11	11.3	10-JUN-11	9999999	10-JUN-11	126	10-JUN-11	1.35	10-JUN-11	1.8	03-JUN-11	48	03-JUN-11	23	03-JUN-11	234	03-JUN-11	2.2	03-JUN-11	1.75	Y	0.587787	0.587787	0.559616	0.559616	0.300105	0.300105	17.7915	17.7915	25.8532	26
0801825	04-MAR-10	15-MAR-10	7.3	17-FEB-16	243	17-FEB-16	140	17-FEB-16	1.58	17-FEB-16	0.6	17-FEB-16	24	17-FEB-16	17	17-FEB-16	111	17-FEB-16	3.8	23-JUL-15	1.05	Y	1	-0.510826	0.0487902	0.0487902	0.457425	0.457425	15.134	15.134	12.6723	13	1	0	1	1	1	5	70	2	1	0	1	0
0742980	02-NOV-13	04-NOV-13	4	22-NOV-13	36	04-DEC-13	133	22-NOV-13	1.95	22-NOV-13	2	22-NOV-13	54	22-NOV-13	14	22-NOV-13	56	22-NOV-13	1.8	22-NOV-13	1.67	Y	0.693147	0.693147	0.512824	0.512824	0.667829	0.667829	21.1848	21.1848	23.6684	24	3	0	0	0	0	6	17	2	3	1	0	0	1	1	1	0	1
1297675	13-JAN-14	29-JAN-14	15.4	29-JAN-14	56	31-JAN-14	136	29-JAN-14	3.75	29-JAN-14	20.4	29-JAN-14	311	29-JAN-14	98	29-JAN-14	190	29-JAN-14	1.8	29-JAN-14	3.07	Y	3.01553	3.01553	1.12168	1.12168	1.32176	1.32176	43.0407	40	40	40	3	0	0	0	0	2	20	0	0	0	1	0	1	1	1	1	1
0834108	07-NOV-14	15-NOV-14	30	14-NOV-14	47	14-NOV-14	139	14-NOV-14	1.88	14-NOV-14	8.5	14-NOV-14	42	14-NOV-14	13	14-NOV-14	112	14-NOV-14	3.7	14-NOV-14	1.62	Y	2.14007	2.14007	0.482426	0.482426	0.631272	0.631272	25.9639	25.9639	25.0375	25	1	1	0	0	1	7	37	2	3	0	1	0	1	0	1	0
2122811	19-JAN-15	07-FEB-15	11.9	06-FEB-15	18	06-FEB-15	151	07-FEB-15	5.03	07-FEB-15	27.2	07-FEB-15	191	07-FEB-15	69	07-FEB-15	81	07-FEB-15	2.4	07-FEB-15	6.49	Y	3.30322	3.30322	1.87026	1.87026	1.61542	1.61542	55.3227	40	40	40	1	0	0	1	1	2	27	0	1	0	1	0	1	1	1	0	0
1924573	25-DEC-08	02-JAN-09	4	15-AUG-16	138	15-AUG-16	137	15-AUG-16	1.43	15-AUG-16	0.8	15-AUG-16	20	15-AUG-16	17	15-AUG-16	35	15-AUG-16	3.9	07-DEC-15	3.4	Y	1	-0.223144	1.22378	1.22378	0.357674	0.357674	27.3392	27.3392	27.3392	27
1114385	31-DEC-15	11-JAN-16	6	14-JUL-16	63	14-JUL-16	138	14-JUL-16	1.08	14-JUL-16	5.1	13-JUL-16	110	13-JUL-16	56	13-JUL-16	164	13-JUL-16	1.9	14-DEC-15	1.59		1.62924	1.62924	0.463734	0.463734	0.076961	0.076961	18.5189	18.5189	17.81	18	1	0	0	0	0	12	114	6	2	0	0	0	1	1	1	0	1
1385411	15-MAR-08	21-MAY-08	4.1	25-JAN-09	49	25-JAN-09	130	25-JAN-09	7.19	25-JAN-09	9999999	13-JAN-09	21	09-JAN-09	16	09-JAN-09	134	09-JAN-09	1.5	09-JAN-09	1.61	Y	16.1181	16.1181	0.476234	0.476234	1.97269	1.97269	91.5689	40	40	40
1983441	06-MAY-09	11-MAY-09	10	09-MAY-09	44	09-MAY-09	125	11-MAY-09	0.92	11-MAY-09	11.2	11-MAY-09	97	11-MAY-09	60	11-MAY-09	137	11-MAY-09	2.2	18-MAY-09	2.29	Y	2.41591	2.41591	0.828552	0.828552	1	-0.0833816	34.4119	34.4119	36.6248	37
2010817	11-NOV-09	20-NOV-09	17.3	20-NOV-09	9999999	20-NOV-09	134	20-NOV-09	1.02	20-NOV-09	26.1	20-NOV-09	103	20-NOV-09	70	20-NOV-09	283	20-NOV-09	2.2	20-NOV-09	2.20	Y	3.26194	3.26194	0.788457	0.788457	0.0198026	0.0198026	27.7803	27.7803	28.9901	29
2075965	23-MAR-11	27-MAR-11	5.6	26-MAR-11	115	26-MAR-11	134	26-MAR-11	0.74	26-MAR-11	9999999	23-MAR-11	163	23-MAR-11	84	23-MAR-11	437	23-MAR-11	2.2	23-MAR-11	1.62		16.1181	16.1181	0.482426	0.482426	1	-0.301105	82.3296	40	40	40
1509551	14-DEC-08	17-DEC-08	4.6	21-APR-15	172	21-APR-15	140	21-JUN-16	76.85	21-JUN-16	0.5	21-JUN-16	46	21-JUN-16	75	21-JUN-16	56	21-JUN-16	4.4	21-APR-15	1.05		1	-0.693147	0.0487902	0.0487902	4.34186	4.34186	52.308	40	40	40
2233378	16-AUG-13	18-AUG-13	6.3	18-AUG-13	195	18-AUG-13	138	18-AUG-13	0.88	18-AUG-13	1	17-AUG-13	17	17-AUG-13	22	17-AUG-13	45	17-AUG-13	3.3	17-AUG-13	1.05		0	0	0.0487902	0.0487902	1	-0.127833	16.5464	16.5464	15.7725	16	4	0	0	0	0	2	5	0	0		0	0	1
1505231	19-AUG-15	23-AUG-15	11.1	16-JUN-16	179	16-JUN-16	138	16-JUN-16	0.97	16-JUN-16	1.4	15-JUN-16	47	15-JUN-16	24	15-JUN-16	91	15-JUN-16	4.1	07-SEP-14	1.07		0.336472	0.336472	0.0676586	0.0676586	1	-0.0304592	18.0296	18.0296	17.3046	17	3	0	1
2192731	26-OCT-12	31-OCT-12	15	18-SEP-14	152	18-SEP-14	135	18-SEP-14	1.41	18-SEP-14	7.3	18-SEP-14	548	18-SEP-14	140	18-SEP-14	114	18-SEP-14	2.3	18-SEP-14	1.96	Y	1.98787	1.98787	0.672944	0.672944	0.34359	0.34359	24.7693	24.7693	25.7745	26	6	0	0	0	1	1	5	0	0	0	0	0	1	1	1	1	1
0924088	11-MAR-15	13-MAR-15	6.7	13-MAR-15	334	13-MAR-15	133	13-MAR-15	0.93	13-MAR-15	1.5	11-MAR-15	54	11-MAR-15	37	11-MAR-15	85	11-MAR-15	4	11-MAR-15	1.22	Y	0.405465	0.405465	0.198851	0.198851	1	-0.0725707	19.7598	19.7598	22.4315	22	2	0	0	0	1	2	5	0	0	0	0	0	0	1	0	0	1
1568597	21-MAR-15	30-MAR-15	6.6	19-MAY-15	99	19-MAY-15	129	19-MAY-15	3.41	19-MAY-15	0.8	28-APR-15	38	28-APR-15	20	28-APR-15	113	28-APR-15	2.8	28-APR-15	2.32	Y	1	-0.223144	0.841567	0.841567	1.22671	1.22671	31.3752	31.3752	33.6521	34	3	0	1	0	1	21	212	15	2	0			1	1	1	0
1896703	05-FEB-15	06-FEB-15	3	28-MAY-16	50	28-MAY-16	139	27-MAY-16	0.57	27-MAY-16	1.3	27-MAY-16	167	27-MAY-16	57	27-MAY-16	130	27-MAY-16	2.9	04-AUG-15	1.25	Y	0.262364	0.262364	0.223144	0.223144	1	-0.562119	19.4909	19.4909	18.1373	18	1	0	0	1	1	27	52	16	8	0	0	1	1	1	1	0
1296997	26-OCT-14	30-OCT-14	6.6	04-JAN-16	131	04-JAN-16	139	01-MAR-16	2.53	01-MAR-16	0.7	17-DEC-15	21	17-DEC-15	9	17-DEC-15	98	17-DEC-15	3	30-DEC-15	0.98		1	-0.356675	-0.0202027	-0.0202027	0.928219	0.928219	18.8668	18.8668	17.472	17	4	1	1	0	1	9	29	3	3	0	0	0	0	0	0	0
0550433	02-DEC-09	04-DEC-09	8.1	04-DEC-09	103	04-DEC-09	136	04-DEC-09	1.54	04-DEC-09	9999999	02-DEC-09	40	09-NOV-09	28	09-NOV-09	145	09-NOV-09	4.4	09-NOV-09	1.11		16.1181	16.1181	0.10436	0.10436	0.431782	0.431782	72.6574	40	40	40
1939816	14-FEB-10	02-MAR-10	13	02-MAR-10	158	02-MAR-10	129	02-MAR-10	0.55	02-MAR-10	9999999	26-FEB-10	41	22-FEB-10	39	22-FEB-10	130	22-FEB-10	2.3	22-FEB-10	1.39	Y	16.1181	16.1181	0.329304	0.329304	1	-0.597837	80.6146	40	40	40
1608238	05-NOV-11	08-NOV-11	5.3	08-NOV-11	74	08-NOV-11	139	08-NOV-11	0.84	08-NOV-11	1.2	06-NOV-11	35	06-NOV-11	33	06-NOV-11	71	06-NOV-11	2.4	06-NOV-11	1.15	Y	0.182322	0.182322	0.139762	0.139762	1	-0.174353	18.2545	18.2545	16.8193	17
1393374	07-NOV-11	10-NOV-11	39.5	10-NOV-11	9999999	10-NOV-11	127	10-NOV-11	7.73	10-NOV-11	33	10-NOV-11	818	10-NOV-11	191	10-NOV-11	163	10-NOV-11	2.5	17-NOV-11	2.38	Y	3.49651	3.49651	0.8671	0.8671	2.04511	2.04511	48.93	40	40	40
8109586	18-JUN-12	27-JUN-12	9.8	27-JUN-12	244	27-JUN-12	132	27-JUN-12	0.41	27-JUN-12	1.6	19-JUN-12	21	19-JUN-12	30	19-JUN-12	164	19-JUN-12	1.6	19-JUN-12	1.16	Y	0.470004	0.470004	0.14842	0.14842	1	-0.891598	19.4389	19.4389	22.8315	23
1602890	06-FEB-12	22-FEB-12	9.5	13-SEP-12	9999999	13-SEP-12	143	13-SEP-12	1.55	13-SEP-12	0.8	13-SEP-12	83	13-SEP-12	40	13-SEP-12	82	13-SEP-12	2.7	13-SEP-12	1.28	Y	1	-0.223144	0.24686	0.24686	0.438255	0.438255	17.1689	17.1689	12.6484	13
2230244	08-APR-13	11-APR-13	4.2	07-MAY-13	80	07-MAY-13	133	08-MAY-13	0.94	08-MAY-13	11.6	08-MAY-13	82	08-MAY-13	44	08-MAY-13	118	08-MAY-13	2.2	08-MAY-13	1.76	Y	2.45101	2.45101	0.565314	0.565314	1	-0.0618754	31.5963	31.5963	32.7056	33	1	0	0	0	1	3	24	2	0	0	0	0	0	0	1	0
7031863	17-JAN-15	22-JAN-15	7.4	21-JAN-15	57	21-JAN-15	138	21-JAN-15	0.86	21-JAN-15	13	21-JAN-15	91	21-JAN-15	23	21-JAN-15	117	21-JAN-15	3.3	21-JAN-15	2.22	Y	2.56495	2.56495	0.797507	0.797507	1	-0.150823	34.6276	34.6276	34.4503	34	3	0	0	0	0	1	5	0	0	0	1	0	1	0	1	0
1431325	11-SEP-14	12-SEP-14	7.1	30-APR-15	82	30-APR-15	131	30-APR-15	1.79	30-APR-15	4.2	30-APR-15	133	30-APR-15	56	30-APR-15	233	30-APR-15	3	30-APR-15	1.28	Y	1.43508	1.43508	0.24686	0.24686	0.582216	0.582216	20.1913	20.1913	24.1134	24	1	1	1	0	0	1	1	0	0	0			0		1	1
8412107	18-MAR-15	21-MAR-15	7.8	06-JUN-15	100	06-JUN-15	135	05-JAN-16	1.14	05-JAN-16	2.2	01-DEC-15	45	01-DEC-15	34	01-DEC-15	121	01-DEC-15	3.3	01-DEC-15	1.11	Y	0.788457	0.788457	0.10436	0.10436	0.131028	0.131028	11.8331	11.8331	13.6922	14	1	1	1	0	1	7	21	3	1	0	0	0	1	0	1	0
1914106	15-JUL-14	17-JUL-14	7.4	30-MAR-16	195	30-MAR-16	142	30-MAR-16	0.58	30-MAR-16	1.5	2017-05-05	71	02-SEP-15	36	02-SEP-15	93	02-SEP-15	3.8	02-SEP-15	1.09		0.405465	0.405465	0.0861777	0.0861777	1	-0.544727	18.4978	18.4978	14.95	15	1	0	1	1	1
1866165	11-JUN-15	18-JUN-15	6.5	22-JUN-16	137	22-JUN-16	134	22-JUN-16	0.94	22-JUN-16	0.8	22-JUN-16	20	22-JUN-16	11	22-JUN-16	67	22-JUN-16	3.4	14-DEC-15	1.02	Y	1	-0.223144	0.0198026	0.0198026	1	-0.0618754	20.0018	20.0018	21.9816	22	1	0	0	0	1	2	9	0	0	0	0	0	0	1	1	0	1
1356087	20-OCT-08	27-OCT-08	4.2	17-DEC-08	162	17-DEC-08	135	17-DEC-08	0.78	17-DEC-08	9999999	11-DEC-08	31	11-DEC-08	10	11-DEC-08	112	11-DEC-08	2	11-DEC-08	1.38	Y	16.1181	16.1181	0.322083	0.322083	1	-0.248461	80.5337	40	40	40
1327629	14-NOV-08	19-NOV-08	6.2	26-DEC-08	9999999	26-DEC-08	153	27-DEC-08	3.53	26-DEC-08	3.3	27-DEC-08	34	27-DEC-08	18	27-DEC-08	117	27-DEC-08	5.3	27-DEC-08	1.65	Y	1.19392	1.19392	0.500775	0.500775	1.2613	1.2613	28.6223	28.6223	22.6149	23
8077352	03-FEB-09	07-FEB-09	17	06-MAR-09	75	06-MAR-09	127	06-MAR-09	0.65	06-MAR-09	11	06-MAR-09	77	06-MAR-09	27	06-MAR-09	109	06-MAR-09	1.2	06-MAR-09	1.50		2.3979	2.3979	0.405465	0.405465	1	-0.430783	29.6053	29.6053	33.0355	33
1946948	02-FEB-09	04-FEB-09	3.3	27-APR-09	33	27-APR-09	132	27-APR-09	0.55	27-APR-09	9999999	27-APR-09	60	27-APR-09	40	27-APR-09	201	27-APR-09	3	27-APR-09	1.75	Y	16.1181	16.1181	0.559616	0.559616	1	-0.597837	83.1941	40	40	40
1815681	19-MAR-09	24-MAR-09	6	07-JUL-09	70	07-JUL-09	133	08-JUL-09	0.96	08-JUL-09	9999999	08-JUL-09	41	08-JUL-09	44	08-JUL-09	152	08-JUL-09	9999999	08-JUL-09	1.24	Y	16.1181	16.1181	0.215111	0.215111	1	-0.040822	79.3356	40	40	40
1818750	06-DEC-08	11-DEC-08	10.4	15-OCT-09	9999999	15-OCT-09	129	15-OCT-09	2.12	15-OCT-09	3.8	14-OCT-09	49	14-OCT-09	27	14-OCT-09	391	14-OCT-09	2.2	14-OCT-09	2.82	Y	1.335	1.335	1.03674	1.03674	0.751416	0.751416	30.2788	30.2788	32.8452	33
2064324	25-DEC-10	31-DEC-10	4.2	31-DEC-10	9999999	31-DEC-10	132	31-DEC-10	0.85	31-DEC-10	2.2	30-DEC-10	83	30-DEC-10	90	30-DEC-10	85	30-DEC-10	2.6	30-DEC-10	1.21	Y	0.788457	0.788457	0.19062	0.19062	1	-0.162519	21.1153	21.1153	24.2313	24
1396638	12-FEB-12	13-FEB-12	7	13-FEB-12	253	13-FEB-12	134	13-FEB-12	0.5	13-FEB-12	0.2	12-FEB-12	18	12-FEB-12	9	12-FEB-12	21	12-FEB-12	1.9	12-FEB-12	0.96		1	-1.60944	-0.040822	-0.040822	1	-0.693147	19.3228	19.3228	21.3698	21
8420023	22-JUL-12	07-AUG-12	12.1	06-AUG-12	188	06-AUG-12	134	07-AUG-12	5.67	07-AUG-12	1	22-JUL-12	10	22-JUL-12	12	22-JUL-12	64	22-JUL-12	2.5	22-JUL-12	1.08	Y	0	0	0.076961	0.076961	1.73519	1.73519	23.8977	23.8977	25.4918	25
0507967	10-MAY-09	15-MAY-09	8.2	17-JUL-14	173	17-JUL-14	142	17-JUL-14	1.17	17-JUL-14	0.8	17-JUL-14	48	17-JUL-14	66	17-JUL-14	67	17-JUL-14	2.7	17-JUL-14	7.88	Y	1	-0.223144	2.06433	2.06433	0.157004	0.157004	34.833	34.833	33.9804	34	1
7021900	07-DEC-14	11-DEC-14	8.5	11-DEC-14	131	11-DEC-14	133	11-DEC-14	0.63	11-DEC-14	2.2	11-DEC-14	82	11-DEC-14	39	11-DEC-14	118	11-DEC-14	1.8	11-DEC-14	1.29	Y	0.788457	0.788457	0.254642	0.254642	1	-0.462035	21.8324	21.8324	24.2305	24	1	0	0	0	1	3	7	1	1	0	0	0	1	1	1	0	1
1266004	31-MAR-11	01-APR-11	3.3	05-AUG-16	53	05-AUG-16	134	05-AUG-16	0.59	05-AUG-16	0.9	02-AUG-16	65	02-AUG-16	16	02-AUG-16	86	02-AUG-16	2.8	10-APR-15	1.28	Y	1	-0.105361	0.24686	0.24686	1	-0.527633	22.5448	22.5448	24.2729	24	1	0	0	1	1	5	17	1	0	0	0	0	1	1	0	0	1
0571023	20-JUN-15	24-JUN-15	9	24-JUN-15	150	24-JUN-15	131	24-JUN-15	1.19	24-JUN-15	1.9	20-JUN-15	65	20-JUN-15	36	20-JUN-15	124	20-JUN-15	3	20-JUN-15	1.43		0.641854	0.641854	0.357674	0.357674	0.173953	0.173953	14.5269	14.5269	19.5706	20	3	1	0	0	1	4	18	1	0	0	0	0	1	0	0	0
0133855	05-MAY-15	08-MAY-15	6.1	18-AUG-15	543	18-AUG-15	138	27-AUG-15	1.49	27-AUG-15	0.4	18-AUG-15	22	18-AUG-15	15	18-AUG-15	69	18-AUG-15	4	18-AUG-15	1.01		1	-0.916291	0.00995033	0.00995033	0.398776	0.398776	14.1377	14.1377	13.2843	13	3
0776947	13-JUL-11	17-JUL-11	3.7	01-JUL-16	48	01-JUL-16	140	01-JUL-16	0.89	01-JUL-16	1.5	01-FEB-16	26	01-FEB-16	11	01-FEB-16	62	01-FEB-16	3.7	15-SEP-15	1.06	Y	0.405465	0.405465	0.0582689	0.0582689	1	-0.116534	18.1853	18.1853	16.0256	16
1337676	28-NOV-10	03-DEC-10	6.5	14-AUG-16	77	14-AUG-16	140	14-AUG-16	0.88	14-AUG-16	4.2	14-AUG-16	72	14-AUG-16	37	14-AUG-16	166	14-AUG-16	3.3	15-SEP-15	1.33	Y	1.43508	1.43508	0.285179	0.285179	1	-0.127833	24.6186	24.6186	23.0959	23	2	0	1	1	1	1	2	0	0	0	0	0	1	1	1	0	1
0903608	05-JUN-15	08-JUN-15	16.8	17-FEB-16	98	17-FEB-16	143	18-FEB-16	0.44	18-FEB-16	3.5	18-FEB-16	118	18-FEB-16	300	18-FEB-16	230	18-FEB-16	2.7	25-SEP-15	1.09	Y	1.25276	1.25276	0.0861777	0.0861777	1	-0.820981	21.7006	21.7006	18.0774	18	4	0	0	1	1	4	25	1	0	0	0	0	1	1	1	0	1
1127206	22-JUN-11	16-JUL-11	10.2	30-OCT-15	319	30-OCT-15	128	30-OCT-15	0.68	30-OCT-15	9999999	30-OCT-15	30	30-OCT-15	17	30-OCT-15	59	30-OCT-15	3.8	30-OCT-15	1.02		16.1181	16.1181	0.0198026	0.0198026	1	-0.385662	77.1482	40	40	40
0440159	13-JAN-13	22-JAN-13	4.8	16-MAR-16	131	16-MAR-16	136	16-MAR-16	3.6	16-MAR-16	0.5	16-MAR-16	52	16-MAR-16	34	16-MAR-16	115	16-MAR-16	1.9	25-DEC-15	1.49	Y	1	-0.693147	0.398776	0.398776	1.28093	1.28093	26.9348	26.9348	27.366	27	3	0	1	0	1	11	96	4	4	0	1	0	1	0	1	0
1945809	03-JAN-09	06-JAN-09	3.5	06-JAN-09	76	06-JAN-09	135	04-JAN-09	0.5	04-JAN-09	9999999	05-JAN-09	20	03-JAN-09	22	03-JAN-09	184	03-JAN-09	3.7	03-JAN-09	1.17		16.1181	16.1181	0.157004	0.157004	1	-0.693147	78.6848	40	40	40
0382822	07-DEC-09	23-DEC-09	6.2	16-DEC-09	9999999	16-DEC-09	152	16-DEC-09	1.62	16-DEC-09	8.9	16-DEC-09	51	16-DEC-09	21	16-DEC-09	42	16-DEC-09	3.5	16-DEC-09	1.90	Y	2.18605	2.18605	0.641854	0.641854	0.482426	0.482426	26.4989	26.4989	19.8158	20
1748054	03-JAN-10	04-JAN-10	9.1	04-JAN-10	9999999	04-JAN-10	132	03-JAN-10	2.69	03-JAN-10	9999999	03-JAN-10	776	03-JAN-10	172	03-JAN-10	95	03-JAN-10	2.6	03-JAN-10	1.42	Y	16.1181	16.1181	0.350657	0.350657	0.989541	0.989541	80.7537	40	40	40
0339873	29-SEP-10	22-OCT-10	12.5	08-NOV-10	202	08-NOV-10	134	08-NOV-10	1.71	08-NOV-10	9999999	07-NOV-10	28	06-NOV-10	25	06-NOV-10	101	06-NOV-10	2.4	06-NOV-10	1.36	Y	16.1181	16.1181	0.307485	0.307485	0.536493	0.536493	75.9345	40	40	40
2076761	29-MAR-11	07-APR-11	5.2	06-APR-11	91	06-APR-11	131	07-APR-11	0.82	07-APR-11	1.8	06-APR-11	54	06-APR-11	30	06-APR-11	192	06-APR-11	1.9	06-APR-11	1.44		0.587787	0.587787	0.364643	0.364643	1	-0.198451	22.3058	22.3058	25.8093	26	0	0	0	0	1	1	9	0	0	0	0	0	1	0	1	0	999
0498235	02-MAY-12	30-MAY-12	7.1	26-JUN-13	179	26-JUN-13	140	26-JUN-13	1.74	26-JUN-13	9999999	26-JUN-13	33	26-JUN-13	55	26-JUN-13	64	26-JUN-13	3.9	26-JUN-13	0.94	Y	16.1181	16.1181	-0.0618754	-0.0618754	0.553885	0.553885	71.9641	40	40	40	2	0	0	1	1	3	56	2	0	1	0	0	1	1	0	0	999
1147129	21-MAR-13	27-MAR-13	4.8	20-JAN-16	418	20-JAN-16	132	20-JAN-16	0.43	20-JAN-16	1.2	19-JAN-16	13	19-JAN-16	7	19-JAN-16	48	19-JAN-16	3.5	30-OCT-15	1.02	Y	0.182322	0.182322	0.0198026	0.0198026	1	-0.84397	16.911	16.911	20.7207	21	2	0	0	0	0	10	29	0	4	0	0	0	0	0	0	0	999
0846790	02-SEP-14	25-SEP-14	4.9	24-SEP-14	9999999	24-SEP-14	137	24-SEP-14	4.24	24-SEP-14	5	23-SEP-14	41	23-SEP-14	19	23-SEP-14	197	23-SEP-14	3.2	23-SEP-14	1.52	Y	1.60944	1.60944	0.41871	0.41871	1.44456	1.44456	31.0277	31.0277	31.0277	31	1	1	1	0	0	15	135	7	5	0	0	1	1	0	0	0	999
0774256	21-FEB-14	04-MAR-14	9.2	02-MAR-15	9999999	02-MAR-15	137	24-NOV-15	5.44	02-MAR-15	0.7	28-FEB-15	43	28-FEB-15	28	28-FEB-15	442	28-FEB-15	3.9	28-FEB-15	1.15	Y	1	-0.356675	0.139762	0.139762	1.69378	1.69378	27.9848	27.9848	27.9848	28	1	1	1	0	0	12	100	3	4	0	0	0	1	1	1	0	1
0908610	09-APR-15	13-APR-15	3.5	13-APR-15	126	13-APR-15	131	13-APR-15	1.68	13-APR-15	4.3	09-APR-15	141	09-APR-15	55	09-APR-15	362	09-APR-15	1.5	09-APR-15	1.37	Y	1.45862	1.45862	0.314811	0.314811	0.518794	0.518794	20.4343	20.4343	24.3083	24	2	1	0	0	0	2	15	1	0	0	0	0	0	1	1	0	1
2128915	29-NOV-15	03-DEC-15	4.5	19-JUL-16	9999999	19-JUL-16	137	19-JUL-16	0.53	19-JUL-16	2.1	19-JUL-16	43	19-JUL-16	20	19-JUL-16	84	19-JUL-16	2.7	06-DEC-15	1.72		0.741937	0.741937	0.542324	0.542324	1	-0.634878	24.8786	24.8786	24.8786	25	2	1	1	1	1	11	31	3	2	0	0	0	1	0	1	0	999
0926125	30-APR-08	19-MAY-08	6.7	15-MAY-08	82	15-MAY-08	139	19-MAY-08	2.1	19-MAY-08	2.1	04-MAY-08	128	04-MAY-08	58	04-MAY-08	81	04-MAY-08	9999999	09-MAY-08	1.41	Y	0.741937	0.741937	0.34359	0.34359	0.741937	0.741937	20.1831	20.1831	18.8752	19	1	0	0	0	0			0	0	0	0	0	0	0	0	0	999
1823887	25-OCT-08	31-OCT-08	4.2	17-NOV-08		19-NOV-08	139	16-NOV-08	6.11	16-NOV-08	30	17-NOV-08	288	17-NOV-08	86	17-NOV-08	59	17-NOV-08	3.7	17-NOV-08	1.93	Y	3.4012	3.4012	0.65752	0.65752	1.80993	1.80993	43.9717	40	40	40	1	0	0	0	0			0	0	0	0	0	0	0	0	0	999
1195417	05-JAN-09	11-JAN-09	3.7	11-JAN-09	74	11-JAN-09	140	11-JAN-09	0.74	11-JAN-09	9999999	08-JAN-09	40	23-DEC-08	22	23-DEC-08	93	23-DEC-08	2.7	23-DEC-08	1.26	Y	16.1181	16.1181	0.231112	0.231112	1	-0.301105	79.5149	40	40	40	1	0	0	0	0			0	0	0	0	0	0	0	0	0	999
0123615	28-NOV-08	29-NOV-08	5.2	22-DEC-09	9999999	22-DEC-09	147	22-DEC-09	2.12	22-DEC-09	3.4	22-DEC-09	67	22-DEC-09	23	22-DEC-09	34	22-DEC-09	1.8	22-DEC-09	1.67	Y	1.22378	1.22378	0.512824	0.512824	0.751416	0.751416	23.9905	23.9905	18.7074	19	1	0	0	0	0			0	0	0	0	0	0	0	0	0	999
0790258	26-JUN-09	29-JUN-09	5.8	27-DEC-09	80	27-DEC-09	133	27-DEC-09	0.99	27-DEC-09	6.2	27-DEC-09	168	27-DEC-09	33	27-DEC-09	130	27-DEC-09	2.1	27-DEC-09	2.06	Y	1.82455	1.82455	0.722706	0.722706	1	-0.0100503	30.9911	30.9911	32.1803	32	1	0	0	0	0			0	0	0	0	0	0	0	0	0	999
2081342	29-APR-11	30-APR-11	4.8	30-APR-11	9999999	30-APR-11	130	30-APR-11	0.8	30-APR-11	9999999	29-APR-11	36	29-APR-11	19	29-APR-11	98	29-APR-11	9999999	29-APR-11	1.65		16.1181	16.1181	0.500775	0.500775	1	-0.223144	82.5351	40	40	40	0	1	0	0	0	1	2	0	0	0	0	0	0	0	1	0	999
8054783	04-JAN-12	20-JAN-12	8.3	10-JAN-12	55	10-JAN-12	137	10-JAN-12	0.6	10-JAN-12	25.4	10-JAN-12	76	10-JAN-12	44	10-JAN-12	239	10-JAN-12	2.7	13-JAN-12	1.76	Y	3.23475	3.23475	0.565314	0.565314	1	-0.510826	34.5589	34.5589	34.5589	35	1	0	0	0	1	4	43	1	2	0	1	0	1	0	0	0	999
1093341	03-APR-12	01-MAY-12	17.8	23-APR-12	9999999	23-APR-12	152	23-APR-12	1.58	23-APR-12	9999999	21-APR-12	328	19-APR-12	106	19-APR-12	169	19-APR-12	1.5	19-APR-12	1.62	Y	16.1181	16.1181	0.482426	0.482426	0.457425	0.457425	77.1371	40	40	40	2	1	0	0	0	1	28	0	0	0	1	0	1	1	0	0	999
8403699	10-JUL-12	21-JUL-12	6	17-JUL-12	164	17-JUL-12	136	17-JUL-12	3.14	17-JUL-12	9999999	13-JUL-12	39	11-JUL-12	16	11-JUL-12	124	11-JUL-12	3.3	11-JUL-12	1.05	Y	16.1181	16.1181	0.0487902	0.0487902	1.14422	1.14422	78.8531	40	40	40	1	1	1	0	1	5	33	1	1	0	1	0	0	0	1	0	999
0863258	06-JAN-13	10-JAN-13	15.2	22-JAN-13	165	22-JAN-13	136	22-JAN-13	2.12	22-JAN-13	9999999	21-JAN-13	44	19-JAN-13	17	19-JAN-13	112	19-JAN-13	3.2	19-JAN-13	1.58	Y	16.1181	16.1181	0.457425	0.457425	0.751416	0.751416	79.6706	40	40	40	1	1	0	0	1	5	28	2	1	0	0	0	1	0	1	0	999
0586741	23-MAR-14	27-MAR-14	9.7	25-MAR-14	9999999	25-MAR-14	132	26-MAR-14	3.46	25-MAR-14	9999999	24-MAR-14	17	24-MAR-14	9	24-MAR-14	99	24-MAR-14	1.1	24-MAR-14	2.11	Y	16.1181	16.1181	0.746688	0.746688	1.24127	1.24127	87.5982	40	40	40	2	1	1	0	1	13	51	6	2	0	1	0	1	0	1	0	999
0269467	25-MAY-14	27-MAY-14	3.5	09-OCT-15	118	09-OCT-15	137	09-OCT-15	0.65	09-OCT-15	1.9	21-JUL-15	67	21-JUL-15	35	21-JUL-15	77	21-JUL-15	2.5	21-JUL-15	1.26		0.641854	0.641854	0.231112	0.231112	1	-0.430783	21.0147	21.0147	21.0147	21	2	0	0	0	1	4	16	0	1	0	0	0	1	0	0	0	999
2311256	24-MAY-14	10-JUN-14	9.5	10-JUN-14	9999999	10-JUN-14	136	10-JUN-14	0.51	10-JUN-14	10.3	08-JUN-14	182	08-JUN-14	61	08-JUN-14	130	08-JUN-14	2	08-JUN-14	1.25		2.33214	2.33214	0.223144	0.223144	1	-0.673345	27.3147	27.3147	27.7333	28	1	0	0	0	0	2	23	0	0	0	0	0	0	0	0	0	999
7034495	17-MAY-15	11-JUN-15	3.9	11-JUN-15	85	11-JUN-15	133	11-JUN-15	1.38	11-JUN-15	1.2	11-JUN-15	66	11-JUN-15	15	11-JUN-15	80	11-JUN-15	2.8	11-JUN-15	1.71	Y	0.182322	0.182322	0.536493	0.536493	0.322083	0.322083	16.2102	16.2102	19.3505	19	1	1	1	0	1	2	29	0	0	0	0	0	1	1	1	0	1
1922049	04-AUG-09	11-AUG-09	9.3	10-AUG-09	244	10-AUG-09	127	11-AUG-09	0.66	11-AUG-09	9999999	03-AUG-09	23	03-AUG-09	12	03-AUG-09	179	03-AUG-09	1.3	04-AUG-09	0.94	Y	16.1181	16.1181	-0.0618754	-0.0618754	1	-0.415515	76.2334	40	40	40	1	0	0	0	0			0	0	0	0	0	0	0	0	0	999
0380815	19-JUL-10	23-JUL-10	4.3	23-JUL-10	9999999	23-JUL-10	135	23-JUL-10	0.64	23-JUL-10	9999999	19-JUL-10	42	19-JUL-10	24	19-JUL-10	78	19-JUL-10	2.3	19-JUL-10	1.43	Y	16.1181	16.1181	0.357674	0.357674	1	-0.446287	80.9324	40	40	40	1	0	0	0	0	4	20	2	1	0	0	0	0	0	0	0	999
1781195	14-NOV-10	22-NOV-10	10.3	22-NOV-10	9999999	22-NOV-10	135	22-NOV-10	0.66	22-NOV-10	1.6	22-NOV-10	73	22-NOV-10	19	22-NOV-10	85	22-NOV-10	1.7	22-NOV-10	1.85	Y	0.470004	0.470004	0.615186	0.615186	1	-0.415515	24.6667	24.6667	25.6787	26	0	0	0	0	1	1	8	0	0	0	0	0	1	1	1	1	1
0598660	03-JUN-11	16-JUN-11	5.1	16-JUN-11	102	16-JUN-11	121	16-JUN-11	1.89	16-JUN-11	3.4	15-JUN-11	43	15-JUN-11	18	15-JUN-11	58	15-JUN-11	3.5	15-JUN-11	1.44	Y	1.22378	1.22378	0.364643	0.364643	0.636577	0.636577	21.2319	21.2319	31.1415	31	1	0	1	1	1	4	18	2	1	0	0	0	1	0	1	0	999
2056279	03-MAR-11	11-MAR-11	5.8	27-JUL-11	96	27-JUL-11	133	27-JUL-11	4.62	27-JUL-11	1	27-JUL-11	35	27-JUL-11	15	27-JUL-11	95	27-JUL-11	1.9	27-JUL-11	1.22	Y	0	0	0.198851	0.198851	1.53039	1.53039	23.303	23.303	25.507	26	1	0	0	1	1	1	8	0	0	0	0	0	1	0	1	0	999
2107577	25-AUG-12	21-OCT-12	21	16-OCT-12	9999999	16-OCT-12	138	16-OCT-12	4.39	16-OCT-12	7.5	15-OCT-12	39	15-OCT-12	14	15-OCT-12	100	15-OCT-12	1.8	15-OCT-12	2.93	Y	2.0149	2.0149	1.075	1.075	1.47933	1.47933	40.2435	40	40	40	0	0	0	0	1	5	72	1	3	0	1	0	1	0	1	0	999
0404202	11-DEC-12	16-DEC-12	19.7	16-DEC-12	151	16-DEC-12	139	16-DEC-12	0.92	16-DEC-12	1.1	16-DEC-12	61	16-DEC-12	22	16-DEC-12	269	16-DEC-12	1.5	16-DEC-12	1.69	Y	0.0953102	0.0953102	0.524729	0.524729	1	-0.0833816	22.2372	22.2372	21.0649	21	1	1	0	0	1	3	29	0	1	0	1	0	1	0	0	0	999
1198263	02-JUN-12	07-JUN-12	4	14-FEB-13	58	14-FEB-13	135	14-FEB-13	6.39	14-FEB-13	1.2	14-FEB-13	47	14-FEB-13	27	14-FEB-13	111	14-FEB-13	3	14-FEB-13	1.20	Y	0.182322	0.182322	0.182322	0.182322	1.85473	1.85473	26.911	26.911	27.7749	28	1	1	1	1	1	17	149	5	9	0	0	0	1	0	0	0	999
2230370	31-MAR-13	22-APR-13	3.6	22-APR-13	103	22-APR-13	132	22-APR-13	0.95	22-APR-13	1.3	22-APR-13	43	22-APR-13	18	22-APR-13	100	22-APR-13	2.3	22-APR-13	1.23		0.262364	0.262364	0.207014	0.207014	1	-0.0512933	19.3103	19.3103	22.7241	23	1	0	1	0	0	1	22	0	0	0	0	0	0	0	1	0	999
0926164	31-AUG-13	13-SEP-13	3.7	13-SEP-13	90	13-SEP-13		13-SEP-13	0.79	13-SEP-13	8.4	13-SEP-13	47	13-SEP-13	17	13-SEP-13	27	13-SEP-13	4.7	13-SEP-13	2.46	Y	2.12823	2.12823	0.900161	0.900161	1	-0.235722	34.1265	34.1265	NA	#VALUE!	1	0	0	0	1	1	13	0	0	0	0	0	0	0	1	0	999
1182524	22-APR-14	25-APR-14	6.2	25-APR-14	9999999	25-APR-14	132	25-APR-14	0.98	25-APR-14	9999999	22-APR-14	53	22-APR-14	24	22-APR-14	147	22-APR-14	2.6	22-APR-14	1.94	Y	16.1181	16.1181	0.662688	0.662688	1	-0.0202027	84.3485	40	40	40	5	1	1	0	1	3	15	0	1	0	0	0	1	1	0	0	1
7051387	28-JAN-15	03-FEB-15	4.1	03-FEB-15	67	03-FEB-15	136	03-FEB-15	0.41	03-FEB-15	1	03-FEB-15	45	03-FEB-15	32	03-FEB-15	130	03-FEB-15	2.2	12-FEB-15	1.09	Y	0	0	0.0861777	0.0861777	1	-0.891598	16.9652	16.9652	17.7253	18	1	1	0	0	1	1	6	0	0	0	0	0	0	0	0	0	999
0771193	17-APR-15	21-APR-15	4.1	31-JUL-15	104	31-JUL-15	139	31-JUL-15	0.75	31-JUL-15	0.7	31-JUL-15	27	31-JUL-15	25	31-JUL-15	65	31-JUL-15	2.2	31-JUL-15	4.03	Y	1	-0.356675	1.39377	1.39377	1	-0.287682	35.3902	35.3902	35.0859	35	1	0	0	0	0	3	8	1	0	0	0	0	0	0	0	0	999
0162090	29-SEP-15	02-OCT-15	3.9	13-AUG-16	9999999	13-AUG-16	127	13-AUG-16	1.29	13-AUG-16	2.3	13-AUG-16	250	13-AUG-16	220	13-AUG-16	188	13-AUG-16	2.1	02-OCT-15	1.27	Y	0.832909	0.832909	0.239017	0.239017	0.254642	0.254642	14.6923	14.6923	23.0438	23	1	0	1	0	0	9	31	4	0	0	0	0	0	0	0	1	999
1351013	21-FEB-09	22-FEB-09	5.9	05-JUL-16	96	05-JUL-16	139	05-JUL-16	1.03	05-JUL-16	2.1	05-JUL-16	34	05-JUL-16	23	05-JUL-16	95	05-JUL-16	3.9	08-DEC-15	1.10	Y	0.741937	0.741937	0.0953102	0.0953102	0.0295588	0.0295588	10.5849	10.5849	8.64348	9	1	0	0	0	0	2	6	0	0	0	0	0	0	1	0	0	999
1842820	17-FEB-09	25-FEB-09	7.6	02-AUG-16	191	02-AUG-16	140	02-AUG-16	1.19	02-AUG-16	9999999	02-AUG-16	30	02-AUG-16	36	02-AUG-16	83	02-AUG-16	4.2	17-DEC-15	1.22	Y	16.1181	16.1181	0.198851	0.198851	0.173953	0.173953	71.2483	40	40	40	2	1	1	1	1	3	10	1	0	1	0	0	0	0	0	0	999
8149481	27-NOV-15	01-DEC-15	3.4	17-JUN-16	61	17-JUN-16	131	20-JUL-16	1.25	20-JUL-16	1	20-JUL-16	32	20-JUL-16	27	20-JUL-16	136	20-JUL-16	3	22-DEC-15	0.99		0	0	-0.0100503	-0.0100503	0.223144	0.223144	8.45292	8.45292	14.6992	15	1	1	0	0	1	3	8	1	0	0	0	0	0	0	1	0	999
0789455	27-NOV-08	03-DEC-08	13.8	03-DEC-08	127	03-DEC-08	135	03-DEC-08	1.11	03-DEC-08	9999999	27-NOV-08	41	27-NOV-08	17	27-NOV-08	69	27-NOV-08	2.5	27-NOV-08	2.27		16.1181	16.1181	0.81978	0.81978	0.10436	0.10436	77.5367	40	40	40	1	0	0	0	0			0	0	0	0	0	0	0	0	0	999
1574841	16-APR-09	17-APR-09	6.8	11-AUG-11	186	11-AUG-11	141	11-AUG-11	1.13	11-AUG-11	1.5	11-AUG-11	39	11-AUG-11	21	11-AUG-11	65	11-AUG-11	4	11-AUG-11	1.15		0.405465	0.405465	0.139762	0.139762	0.122218	0.122218	10.6976	10.6976	6.8297	7	1	0	0	0	0			0	0	0	0	0	0	0	0	0	999
1465390	11-JUL-11	13-JUL-11	1.8	30-MAY-12	90	30-MAY-12	136	30-MAY-12	1.07	30-MAY-12	1	30-MAY-12	60	30-MAY-12	92	30-MAY-12	83	30-MAY-12	3.5	30-MAY-12	1.15	Y	0	0	0.139762	0.139762	0.0676586	0.0676586	8.64283	8.64283	9.67761	10	1	1	0	0	0	3	10	0	1	0	0	0	1	0	1	0	999
0594959	25-JUN-12	02-JUL-12	5.6	28-JUN-12	81	28-JUN-12	129	28-JUN-12	1.64	28-JUN-12	1.2	30-JUN-12	72	30-JUN-12	41	30-JUN-12	134	30-JUN-12	1.8	30-JUN-12	1.34	Y	0.182322	0.182322	0.29267	0.29267	0.494696	0.494696	15.1313	15.1313	21.6967	22	1	1	0	0	1	12	73	9	1	0	1	0	1	0	1	1	999
1764589	23-AUG-12	25-AUG-12	14.8	25-AUG-12	9999999	25-AUG-12	142	25-AUG-12	3.18	25-AUG-12	1.5	25-AUG-12	48	25-AUG-12	37	25-AUG-12	103	25-AUG-12	2	25-AUG-12	1.66		0.405465	0.405465	0.506818	0.506818	1.15688	1.15688	24.7104	24.7104	22.1876	22	1	1	0	0	0	4	0	3	0	0	1	0	1	1	1	0	999
2304405	14-APR-14	25-APR-14	2.6	25-APR-14	30	25-APR-14	132	23-APR-14	0.77	23-APR-14	2.1	25-APR-14	55	25-APR-14	29	25-APR-14	146	25-APR-14	1.8	25-APR-14	1.46	Y	0.741937	0.741937	0.378436	0.378436	1	-0.261365	23.043	23.043	25.8409	26	2	0	0	0	1	1	11	0	0	0	0	0	0	1	0	0	1
1562597	24-JUL-14	29-JUL-14	5.7	30-APR-16	9999999	30-APR-16	137	30-APR-16	0.83	30-APR-16	9999999	26-APR-16	55	26-APR-16	29	26-APR-16	177	26-APR-16	2.8	24-JUL-14	1.19	Y	16.1181	16.1181	0.173953	0.173953	1	-0.18633	78.8747	40	40	40	1	0	0	0	1	8	38	2	1	0	0	0	1	1	0	0	1
1040558	08-APR-14	08-JUN-14	3	15-APR-15	9999999	15-APR-15	141	15-APR-15	1.03	15-APR-15	4.5	22-OCT-14	47	22-OCT-14	18	22-OCT-14	64	22-OCT-14	5.1	22-OCT-14	2.11	Y	1.50408	1.50408	0.746688	0.746688	0.0295588	0.0295588	20.7612	20.7612	18.2217	18	1	0	0	1	1	4	107	1	1	0	0	0	1	0	0	0	999
0964241	02-NOV-14	08-NOV-14	18	08-NOV-14	9999999	08-NOV-14	125	08-NOV-14	0.67	08-NOV-14	15.3	08-NOV-14	103	08-NOV-14	44	08-NOV-14	245	08-NOV-14	2.2	08-NOV-14	1.36		2.72785	2.72785	0.307485	0.307485	1	-0.400478	29.7551	29.7551	33.8121	34	1	0	0	0	1	1	6	0	0	0	0	0	1	0	1	0	999
2212974	08-FEB-15	13-FEB-15	8.8	12-FEB-15	122	12-FEB-15	130	12-FEB-15	3.68	12-FEB-15	16.1	12-FEB-15	112	12-FEB-15	48	12-FEB-15	100	12-FEB-15	3.7	12-FEB-15	1.95	Y	2.77882	2.77882	0.667829	0.667829	1.30291	1.30291	36.8825	36.8825	37.6026	38	2	1	1	0	0	5	21	0	0	0	1	0	1	0	0	1	999
0894046	17-MAR-15	23-MAR-15	21.8	16-MAY-15	9999999	16-MAY-15	135	16-MAY-15	1.9	16-MAY-15	23.8	16-MAY-15	192	16-MAY-15	59	16-MAY-15	167	16-MAY-15	1.6	16-MAY-15	2.76	Y	3.16969	3.16969	1.01523	1.01523	0.641854	0.641854	35.9245	35.9245	36.1935	36	1	0	0	1	0	6	35	0	3	0	0	1	1	0	1	0	999
0526639	27-JUL-12	01-AUG-12	11.9	10-APR-16	250	10-APR-16	137	10-APR-16	1.3	10-APR-16	9999999	10-APR-16	30	10-APR-16	37	10-APR-16	83	10-APR-16	3.4	22-NOV-15	0.90	Y	16.1181	16.1181	-0.105361	-0.105361	0.262364	0.262364	68.6872	40	40	40	1	0	0	0	1	13	33	6	6	1	0	0	1	1	1	0	999
1531910	09-JUN-08	10-JUN-08	6.9	28-APR-09	9999999	28-APR-09	132	28-APR-09	0.46	28-APR-09	9999999	25-APR-09	86	25-APR-09	34	25-APR-09	124	25-APR-09	4	25-APR-09	1.39		16.1181	16.1181	0.329304	0.329304	1	-0.776529	80.6146	40	40	40	1	0	0	0	0			0	0	0	0	0	0	0	0	0	999
8018621	20-SEP-09	24-SEP-09	7.5	16-AUG-16	177	16-AUG-16	134	16-AUG-16	0.77	16-AUG-16	9999999	16-AUG-16	121	16-AUG-16	47	16-AUG-16	220	16-AUG-16	1.4	24-SEP-09	1.76	Y	16.1181	16.1181	0.565314	0.565314	1	-0.261365	83.2579	40	40	40	2	0	0	0	1	1	10	0	0	0	1	0	0	0	0	0	999
2026020	11-MAR-10	13-MAR-10	2.3	03-JUN-10	61	03-JUN-10	137	03-JUN-10	1.36	03-JUN-10	2.1	03-JUN-10	53	03-JUN-10	25	03-JUN-10	129	03-JUN-10	1.9	03-JUN-10	1.26	Y	0.741937	0.741937	0.231112	0.231112	0.307485	0.307485	14.7656	14.7656	14.7656	15	0	1	0	0	1	2	12	0	1	0	0	1	1	1	1	0	1
1739871	21-DEC-08	23-DEC-08	2.7	06-DEC-10	9999999	06-DEC-10	138	06-DEC-10	1.15	06-DEC-10	2.1	06-DEC-10	61	06-DEC-10	44	06-DEC-10	143	06-DEC-10	2.7	06-DEC-10	1.43	Y	0.741937	0.741937	0.357674	0.357674	0.139762	0.139762	14.578	14.578	13.7391	14	1	0	0	0	0			0	0	0	0	0	0	0	0	0	999
1374599	18-FEB-11	07-MAR-11	4.2	08-JUL-11	101	08-JUL-11	131	08-JUL-11	1.8	08-JUL-11	1.3	08-JUL-11	78	08-JUL-11	41	08-JUL-11	111	08-JUL-11	2.6	08-JUL-11	1.08	Y	0.262364	0.262364	0.076961	0.076961	0.587787	0.587787	13.9088	13.9088	19.0749	19	0	1	0	0	1	2	19	0	0	1	0	0	1	0	0	0	999
2113858	01-MAR-12	07-MAR-12	12.6	07-MAR-12	270	07-MAR-12	126	07-MAR-12	0.67	07-MAR-12	3	07-MAR-12	704	07-MAR-12	2303	07-MAR-12	733	07-MAR-12	1.2	07-MAR-12	1.44		1.09861	1.09861	0.364643	0.364643	1	-0.400478	24.2368	24.2368	29.9588	30	1	0	0	0	0	2	8	1	0	0	1	0	0	0	0	1	999
8094607	17-SEP-12	22-SEP-12	12.9	06-OCT-12	231	06-OCT-12	132	06-OCT-12	1.01	06-OCT-12	9999999	06-OCT-12	85	06-OCT-12	30	06-OCT-12	151	06-OCT-12	9999999	06-OCT-12	1.51	Y	16.1181	16.1181	0.41211	0.41211	0.00995033	0.00995033	72.0673	40	40	40	1	0	0	0	1	1	5	0	0	0	0	0	1	0	1	0	999
1955555	15-NOV-12	18-NOV-12	5.8	30-NOV-12	9999999	30-NOV-12	130	29-NOV-12	6.42	29-NOV-12	1.6	28-NOV-12	96	28-NOV-12	32	28-NOV-12	254	28-NOV-12	1.7	28-NOV-12	1.86	Y	0.470004	0.470004	0.620576	0.620576	1.85942	1.85942	32.9517	32.9517	34.5799	35	1	1	1	1	1	22	230	13	6	0	1	0	1	0	0	0	999
8238679	08-APR-13	19-APR-13	14.7	18-APR-13	9999999	18-APR-13	134	19-APR-13	4.12	19-APR-13	16.2	19-APR-13	295	19-APR-13	102	19-APR-13	129	19-APR-13	1.9	19-APR-13	2.56	Y	2.78501	2.78501	0.940007	0.940007	1.41585	1.41585	41.0351	40	40	40	1	0	0	0	0	2	13	1	0	0	0	0	0	0	0	1	999
0230917	14-SEP-09	23-SEP-09	2.1	21-JUN-13	9999999	21-JUN-13	137	21-JUN-13	0.9	21-JUN-13	9999999	21-JUN-13	100	21-JUN-13	77	21-JUN-13	109	21-JUN-13	3.7	21-JUN-13	1.23		16.1181	16.1181	0.207014	0.207014	1	-0.105361	79.245	40	40	40	1	0	0	0	0			0	0	0	0	0	0	0	0	0	999
1515011	07-JUN-12	15-JUN-12	4.5	01-AUG-13	145	01-AUG-13	138	01-AUG-13	0.98	01-AUG-13	9999999	30-JUL-13	26	19-JUL-13	21	19-JUL-13	97	19-JUL-13	4	19-JUL-13	2.08	Y	16.1181	16.1181	0.732368	0.732368	1	-0.0202027	85.1289	40	40	40	1	1	1	1	1	5	41	2	0	0	0	0	0	0	0	0	999
2030182	30-MAR-14	01-APR-14	8.1	01-APR-14	9999999	01-APR-14	142	01-APR-14	0.78	01-APR-14	9999999	30-MAR-14	49	30-MAR-14	31	30-MAR-14	88	30-MAR-14	3.9	30-MAR-14	1.22	Y	16.1181	16.1181	0.198851	0.198851	1	-0.248461	79.1535	40	40	40	1	0	0	0	0	1	2	0	0	0	0	0	0	0	0	0	999
0249495	08-MAR-14	13-MAR-14	12.4	24-MAY-14	404	24-MAY-14	134	24-MAY-14	0.52	24-MAY-14	9999999	22-MAY-14	38	23-APR-14	12	23-APR-14	54	23-APR-14	2.4	23-APR-14	1.23	Y	16.1181	16.1181	0.207014	0.207014	1	-0.653926	79.245	40	40	40	1	0	0	0	0	6	42	5	0	0	0	0	0	0	0	0	999
0118127	12-MAR-14	16-MAR-14	18	18-JUN-14	177	18-JUN-14	126	18-JUN-14	3.28	18-JUN-14	2.9	12-JUN-14	97	12-JUN-14	26	12-JUN-14	71	12-JUN-14	2.1	16-JUN-14	1.37		1.06471	1.06471	0.314811	0.314811	1.18784	1.18784	25.3481	25.3481	30.6668	31	1	0	1	1	1	5	24	0	0	0	0	0	0	0	0	1	999
1524535	07-OCT-14	07-OCT-14	6.5	20-JUN-16	9999999	20-JUN-16	137	05-AUG-16	1.29	05-AUG-16	9999999	28-JUN-16	29	07-JUN-16	25	07-JUN-16	70	07-JUN-16	3.8	28-JAN-15	1.02		16.1181	16.1181	0.0198026	0.0198026	0.254642	0.254642	70.0151	40	40	40	1	0	0	0	0	2	3	0	0	0	0	0	0	0	0	0	999
0981170	29-JAN-15	05-FEB-15	1.7	05-FEB-15	9999999	05-FEB-15	145	05-FEB-15	2.37	05-FEB-15	15.3	04-FEB-15	23	04-FEB-15	14	04-FEB-15	77	04-FEB-15	3.8	04-FEB-15	3.09	Y	2.72785	2.72785	1.12817	1.12817	0.86289	0.86289	37.6347	37.6347	37.0102	37	2	0	0	0	1	11	68	5	3	0	0	0	1	1	1	0	999
8127139	21-FEB-15	02-MAR-15	13.4	01-MAR-15		05-MAR-15	135	02-MAR-15	2.72	02-MAR-15	9999999	28-FEB-15	37	28-FEB-15	16	28-FEB-15	62	28-FEB-15	2.3	02-MAR-15	2.82	Y	16.1181	16.1181	1.03674	1.03674	1.00063	1.00063	88.5439	40	40	40	1	1	1	0	0	3	20	0	2	0	1	0	1	0	1	0	999
0171411	16-JUL-15	18-JUL-15	14.3	15-APR-16	78	15-APR-16	138	15-APR-16	5.88	15-APR-16	1.1	02-APR-16	55	02-APR-16	50	02-APR-16	141	02-APR-16	2.6	31-DEC-15	1.25	Y	0.0953102	0.0953102	0.223144	0.223144	1.77156	1.77156	26.2433	26.2433	25.7893	26	1	1	1	1	1	25	97	16	6	0	1	0	1	1	1	0	1
0265044	18-DEC-08	21-DEC-08	5.4	20-DEC-08	87	20-DEC-08	139	20-DEC-08	1.75	20-DEC-08	9999999	20-DEC-08	69	18-DEC-08	32	18-DEC-08	139	18-DEC-08	2.9	18-DEC-08	1.92	Y	16.1181	16.1181	0.652325	0.652325	0.559616	0.559616	80.018	40	40	40	1	0	0	0	0			0	0	0	0	0	0	0	0	0	999
1602023	28-JAN-10	12-FEB-10	14.6	12-FEB-10	152	12-FEB-10	132	12-FEB-10	0.96	12-FEB-10	4.4	11-FEB-10	88	11-FEB-10	20	11-FEB-10	157	11-FEB-10	3.3	11-FEB-10	1.92		1.4816	1.4816	0.652325	0.652325	1	-0.040822	28.9065	28.9065	30.7369	31	0	0	0	0	1	1	15	0	0	0	0	0	0	0	0	0	999
1987774	31-JUL-09	04-AUG-09	2.6	17-MAR-10	110	17-MAR-10	143	17-MAR-10	1.42	17-MAR-10	0.8	17-MAR-10	32	17-MAR-10	35	17-MAR-10	45	17-MAR-10	3.6	17-MAR-10	1.07		1	-0.223144	0.0676586	0.0676586	0.350657	0.350657	14.3236	14.3236	9.23963	9	1	0	0	0	0			0	0	0	0	0	0	0	0	0	999
0470775	24-AUG-10	27-AUG-10	3.6	27-AUG-10	9999999	27-AUG-10	130	27-AUG-10	0.98	27-AUG-10	9999999	25-AUG-10	51	24-AUG-10	32	24-AUG-10	121	24-AUG-10	2.8	24-AUG-10	1.08		16.1181	16.1181	0.076961	0.076961	1	-0.0202027	77.7884	40	40	40	0	0	0	0	0	1	3	0	0	0	0	0	0	0	1	0	999
0542665	08-AUG-12	28-AUG-12	5.6	15-FEB-13	186	15-FEB-13	136	27-SEP-13	0.47	27-SEP-13	0.7	27-SEP-13	38	27-SEP-13	38	27-SEP-13	84	27-SEP-13	3.6	27-SEP-13	1.09	Y	1	-0.356675	0.0861777	0.0861777	1	-0.755023	20.7452	20.7452	21.3806	21	1	0	0	0	1	3	32	0	1	0	0	0	0	0	1	0	999
2005146	04-FEB-13	05-FEB-13	7.1	05-FEB-13	65	05-FEB-13	134	05-FEB-13	0.73	05-FEB-13	0.9	05-FEB-13	44	05-FEB-13	30	05-FEB-13	87	05-FEB-13	2.8	05-FEB-13	1.16		1	-0.105361	0.14842	0.14842	1	-0.314711	21.4423	21.4423	23.2795	23	1	0	0	0	1	1	2	0	0	0	0	0	0	0	0	0	999
0125286	20-AUG-13	10-SEP-13	11.1	14-DEC-13	73	14-DEC-13	137	14-DEC-13	1.21	14-DEC-13	9999999	14-DEC-13	30	14-DEC-13	24	14-DEC-13	71	14-DEC-13	3.1	14-DEC-13	1.33	Y	16.1181	16.1181	0.285179	0.285179	0.19062	0.19062	72.3746	40	40	40	2	1	1	0	1	6	41	1	2	0	0	0	1	1	0	0	999
2041205	30-AUG-13	05-SEP-13	3.4	08-JAN-14	85	08-JAN-14	139	08-JAN-14	0.7	08-JAN-14	0.7	08-JAN-14	61	08-JAN-14	54	08-JAN-14	143	08-JAN-14	3	08-JAN-14	1.32		1	-0.356675	0.277632	0.277632	1	-0.356675	22.8895	22.8895	21.7602	22	1	0	0	0	1	1	6	0	0	0	0	0	1	0	0	0	999
1185246	01-MAR-14	30-MAR-14	11.6	16-MAY-16	232	16-MAY-16	133	16-MAY-16	0.5	16-MAY-16	9999999	16-MAY-16	32	16-MAY-16	20	16-MAY-16	103	16-MAY-16	3.6	15-AUG-14	1.43	Y	16.1181	16.1181	0.357674	0.357674	1	-0.693147	80.9324	40	40	40	2	0	0	0	1	4	14	0	1	0	0	0	1	0	1	0	999
2071340	25-AUG-11	26-AUG-11	4.5	30-JAN-15	48	30-JAN-15	134	30-JAN-15	0.93	30-JAN-15	9999999	31-JAN-15	66	30-JAN-15	38	30-JAN-15	59	30-JAN-15	2.1	30-JAN-15	1.23		16.1181	16.1181	0.207014	0.207014	1	-0.0725707	79.245	40	40	40	1	0	0	0	1	7	18	4	2	0	0	0	1	1	0	0	1
1782426	11-FEB-15	13-FEB-15	9.6	13-FEB-15	68	13-FEB-15	111	12-FEB-15	5.31	12-FEB-15	16.6	11-FEB-15	90	11-FEB-15	33	11-FEB-15	64	11-FEB-15	2.4	11-FEB-15	6.70	Y	2.8094	2.8094	1.90211	1.90211	1.66959	1.66959	54.3311	40	40	40	1	0	0	0	1	4	24	3	0	0	1	0	1	0	1	0	999
0547525	03-MAR-15	12-MAR-15	4.4	12-MAR-15	77	12-MAR-15	136	11-MAR-15	1.08	11-MAR-15	2.1	11-MAR-15	66	11-MAR-15	43	11-MAR-15	91	11-MAR-15	2	11-MAR-15	1.07	Y	0.741937	0.741937	0.0676586	0.0676586	0.076961	0.076961	10.7288	10.7288	11.6948	12	1	1	0	0	0	4	25	1	1	0	0	0	1	0	1	0	999
0234928	21-JUL-15	21-JUL-15	37.7	21-JUL-15	9999999	21-JUL-15	134	21-JUL-15	3.85	21-JUL-15	9999999	21-JUL-15	340	21-JUL-15	52	21-JUL-15	121	21-JUL-15	1.7	21-JUL-15	2.82	Y	16.1181	16.1181	1.03674	1.03674	1.34807	1.34807	91.8689	40	40	40	1	0	0	0	0	10	83	2	4	0	1	0	1	1	1	0	1
0299336	25-JUN-14	01-JUL-14	13.1	12-AUG-16	9999999	12-AUG-16	138	12-AUG-16	0.83	12-AUG-16	9999999	11-AUG-16	64	10-AUG-16	27	10-AUG-16	136	10-AUG-16	2.6	07-OCT-15	1.28		16.1181	16.1181	0.24686	0.24686	1	-0.18633	79.6912	40	40	40	1	1	1	1	1	5	24	0	1	0	0	0	1	0	1	0	999
0474619	26-OCT-15	28-OCT-15	8.6	20-AUG-16	189	20-AUG-16	139	20-AUG-16	4.22	20-AUG-16	1	20-AUG-16	38	20-AUG-16	42	20-AUG-16	125	20-AUG-16	3.1	26-OCT-15	1.08	Y	0	0	0.076961	0.076961	1.43984	1.43984	21.0712	21.0712	19.8219	20	1	0	1	0	1	9	71	2	2	0	0	0	0	1	1	0	999
1361511	20-NOV-15	22-NOV-15	10.2	22-NOV-15	117	22-NOV-15	143	22-NOV-15	1.15	22-NOV-15	0.9	21-NOV-15	54	21-NOV-15	29	21-NOV-15	64	21-NOV-15	1.8	21-NOV-15	1.02	Y	1	-0.105361	0.0198026	0.0198026	0.139762	0.139762	11.7693	11.7693	6.17963	6	1	1	0	0	1	4	9	0	1	0	0	0	1	1	1	1	999
1245214	17-APR-12	20-APR-12	6.3	10-AUG-16	132	10-AUG-16	135	19-AUG-16	9.21	11-AUG-16	1.1	08-AUG-16	20	08-AUG-16	9999999	08-AUG-16	148	08-AUG-16	3.1	23-DEC-15	2.73	Y	0.0953102	0.0953102	1.0043	1.0043	2.22029	2.22029	39.2866	39.2866	39.3337	39	1	0	1	0	1	25	144	14	11	0	1	0	0	0	1	0	999
1931141	09-MAY-08	15-MAY-08	10.3	15-MAY-08	9999999	15-MAY-08	141	15-MAY-08	0.7	15-MAY-08	9999999	09-MAY-08	97	09-MAY-08	28	09-MAY-08	154	09-MAY-08	2	11-MAY-08	1.32	Y	16.1181	16.1181	0.277632	0.277632	1	-0.356675	80.0359	40	40	40	2	0	0	0	1	1	6	0	0	0	0	0	0	1	0	0	1
1070843	02-FEB-10	11-FEB-10	2.2	11-FEB-10	110	11-FEB-10	140	11-FEB-10	1.7	11-FEB-10	0.8	11-FEB-10	20	11-FEB-10	10	11-FEB-10	70	11-FEB-10	3.9	11-FEB-10	1.41	Y	1	-0.223144	0.34359	0.34359	0.530628	0.530628	19.1363	19.1363	17.0708	17	1	0	1	0	1	1	9	0	0	0	0	0	1	0	1	0	999
1942216	29-AUG-09	01-SEP-09	12.9	15-JUN-10	39	15-JUN-10	151	15-JUN-10	1.24	15-JUN-10	9999999	15-JUN-10	76	15-JUN-10	38	15-JUN-10	76	15-JUN-10	1.9	15-JUN-10	1.91		16.1181	16.1181	0.647103	0.647103	0.215111	0.215111	76.6626	40	40	40	0	1	0	0	1	1	2	0	0	0	1	0	0	1	0	0	1
1878457	15-APR-12	18-APR-12	7.8	18-APR-12	9999999	18-APR-12	138	18-APR-12	117.5	18-APR-12	9999999	18-APR-12	204	18-APR-12	78	18-APR-12	166	18-APR-12	1.1	18-APR-12	1.47	Y	16.1181	16.1181	0.385262	0.385262	4.76644	4.76644	117.286	40	40	40	0	0	0	0	1	2	8	1	0	0	0	0	1	0	1	0	999
1168382	15-JUN-12	27-JUN-12	6.8	27-JUN-12	62	27-JUN-12	132	27-JUN-12	0.57	27-JUN-12	1	26-JUN-12	60	26-JUN-12	27	26-JUN-12	108	26-JUN-12	1.4	26-JUN-12	1.65	Y	0	0	0.500775	0.500775	1	-0.562119	21.6087	21.6087	24.6433	25	2	0	0	0	0	4	40	1	2	0	0	0	1	0	1	0	999
0536298	19-MAY-13	20-MAY-13	17.4	12-MAY-13	302	12-MAY-13	130	12-MAY-13	0.87	12-MAY-13	9999999	09-MAY-13	92	08-MAY-13	42	08-MAY-13	301	08-MAY-13	9999999	09-MAY-13	1.15		16.1181	16.1181	0.139762	0.139762	1	-0.139262	78.4917	40	40	40	1	0	0	1	1	3	15	2	0	0	1	0	0	0	0	1	999
0315764	03-JUN-13	02-JUL-13	2.2	10-JUN-13	71	10-JUN-13	131	10-JUN-13	0.62	10-JUN-13	9999999	10-JUN-13	68	04-JUN-13	28	04-JUN-13	182	04-JUN-13	3.3	04-JUN-13	1.41	Y	16.1181	16.1181	0.34359	0.34359	1	-0.478036	80.7746	40	40	40	0	0	0	0	1	3	85	1	1	0	0	0	1	0	0	0	999
1443289	28-APR-11	01-MAY-11	6.5	22-JUL-13	123	22-JUL-13	140	22-JUL-13	0.89	22-JUL-13	0.8	22-JUL-13	38	22-JUL-13	20	22-JUL-13	71	22-JUL-13	4.3	22-JUL-13	1.15	Y	1	-0.223144	0.139762	0.139762	1	-0.116534	21.3453	21.3453	19.4985	19	1	0	0	0	1	1	3	0	0	0	0	0	1	1	1	0	1
1941778	03-MAY-12	05-MAY-12	7.9	29-NOV-14	116	29-NOV-14	134	29-NOV-14	8.23	29-NOV-14	1.1	29-NOV-14	30	29-NOV-14	16	29-NOV-14	87	29-NOV-14	3.1	29-NOV-14	1.14	Y	0.0953102	0.0953102	0.131028	0.131028	2.10779	2.10779	28.4293	28.4293	29.5748	30	1	1	1	1	0	9	23	2	3	0	1	0	0	0	0	0	999
1308133	03-MAR-15	16-MAR-15	13.3	15-APR-15	56	15-APR-15	125	15-APR-15	1.47	15-APR-15	9999999	13-APR-15	97	13-APR-15	79	13-APR-15	273	13-APR-15	2.8	13-APR-15	1.33	Y	16.1181	16.1181	0.285179	0.285179	0.385262	0.385262	74.2374	40	40	40	1	0	0	0	1	3	19	2	0	0	1	0	1	1	1	0	1
1287287	30-MAY-15	06-JUN-15	27.9	23-NOV-15	9999999	23-NOV-15	124	23-NOV-15	4.17	23-NOV-15	9999999	23-NOV-15	683	23-NOV-15	191	23-NOV-15	359	23-NOV-15	1.4	23-NOV-15	2.38	Y	16.1181	16.1181	0.8671	0.8671	1.42792	1.42792	90.7331	40	40	40	1	1	0	1	1	6	50	2	0	0	1	0	0	0	0	1	999
2121577	22-FEB-12	03-MAR-12	7	03-MAR-12	358	03-MAR-12	137	03-MAR-12	0.72	03-MAR-12	9999999	22-FEB-12	34	22-FEB-12	27	22-FEB-12	58	22-FEB-12	3.9	22-FEB-12		Y	16.1181	16.1181	1	#NUM!	1	-0.328504	88.1264	40	40	40	0	0	0	0	1	1	10	0	0	0	0	0	0	0	0	0	999
1402648	24-JUN-08	10-JUL-08	8	10-JUL-08	72	10-JUL-08	131	10-JUL-08	0.56	10-JUL-08	9.7	08-JUL-08	58	08-JUL-08	8	08-JUL-08	135	08-JUL-08	3	08-JUL-08	1.76	Y	2.27213	2.27213	0.565314	0.565314	1	-0.579818	30.9202	30.9202	32.718	33	1	0	0	0	1	1	16	0	0	0	0	0	0	0	1	0	999
1774300	21-JAN-09	23-JAN-09	7.9	23-JAN-09	61	23-JAN-09	136	23-JAN-09	0.71	23-JAN-09	9999999	14-JAN-09	70	14-JAN-09	49	14-JAN-09	175	14-JAN-09	3.3	14-JAN-09	1.16	Y	16.1181	16.1181	0.14842	0.14842	1	-0.34249	78.5887	40	40	40	1	1	0	0	1	1	2	0	0	0	0	0	0	0	0	0	999
8172982	04-AUG-08	05-AUG-08	5.3	23-FEB-09	116	23-FEB-09	141	23-FEB-09	1.07	23-FEB-09	1.1	23-FEB-09	57	23-FEB-09	31	23-FEB-09	136	23-FEB-09	3	23-FEB-09	1.09		0.0953102	0.0953102	0.0861777	0.0861777	0.0676586	0.0676586	8.40296	8.40296	4.23215	4	1	0	0	0	0	1	2	0	0	0	0	0	0	0	0	0	999
0545236	16-DEC-09	16-DEC-09	5.2	16-DEC-09	9999999	16-DEC-09	136	16-DEC-09	2.36	16-DEC-09	1.2	16-DEC-09	49	16-DEC-09	22	16-DEC-09	361	16-DEC-09	1.2	16-DEC-09	1.56	Y	0.182322	0.182322	0.444686	0.444686	0.858662	0.858662	20.317	20.317	20.9666	21	1	0	0	0	1	1	1	0	0	0	1	0	1	1	1	0	1
2043750	20-JUL-10	23-JUL-10	11.7	23-JUL-10	94	23-JUL-10	113	23-JUL-10	1.17	23-JUL-10	9	23-JUL-10	123	23-JUL-10	51	23-JUL-10	79	23-JUL-10	2	23-JUL-10	1.93		2.19722	2.19722	0.65752	0.65752	0.157004	0.157004	23.6023	23.6023	36.5893	37	1	0	0	0	1	1	3	0	0	0	0	0	1	0	1	0	999
0786613	17-MAY-11	07-JUN-11	4.4	07-JUN-11	9999999	07-JUN-11	136	15-JUN-11	1.04	15-JUN-11	10	15-JUN-11	86	15-JUN-11	31	15-JUN-11	115	15-JUN-11	2.9	15-JUN-11	2.09	Y	2.30259	2.30259	0.737164	0.737164	0.0392207	0.0392207	23.7654	23.7654	24.3011	24	2	0	0	0	1	1	21	0	0	0	0	0	0	0	1	0	999
1114917	23-NOV-12	26-NOV-12	7.2	26-NOV-12	288	26-NOV-12	126	26-NOV-12	0.51	26-NOV-12	9999999	24-NOV-12	16	24-NOV-12	11	24-NOV-12	164	24-NOV-12	3.1	24-NOV-12	1.14		16.1181	16.1181	0.131028	0.131028	1	-0.673345	78.3939	40	40	40	1	0	1	0	1	1	3	0	1	0	0	0	0	0	1	0	999
1696105	04-DEC-10	07-DEC-10	4.6	22-MAY-13	9999999	22-MAY-13	135	22-MAY-13	0.92	22-MAY-13	0.3	22-MAY-13	39	22-MAY-13	22	22-MAY-13	65	22-MAY-13	9999999	22-MAY-13	1.05		1	-1.20397	0.0487902	0.0487902	1	-0.0833816	20.3264	20.3264	21.6249	22	1	0	0	0	1	1	3	0	0	0	0	0	0	0	1	1	999
1213187	08-JUN-13	11-JUN-13	6.7	11-JUN-13	75	11-JUN-13	140	11-JUN-13	1.03	11-JUN-13	7.2	11-JUN-13	97	11-JUN-13	32	11-JUN-13	151	11-JUN-13	1.6	11-JUN-13	2.35	Y	1.97408	1.97408	0.854415	0.854415	0.0295588	0.0295588	23.7444	23.7444	22.135	22	1	0	0	0	1	2	5	0	1	0	1	0	1	0	0	0	999
8110655	22-DEC-11	06-JAN-12	5.5	31-JUL-13	255	31-JUL-13	137	31-JUL-13	0.83	31-JUL-13	1.4	31-JUL-13	228	31-JUL-13	101	31-JUL-13	1390	31-JUL-13	3.4	31-JUL-13	1.78	Y	0.336472	0.336472	0.576613	0.576613	1	-0.18633	23.7299	23.7299	23.7299	24	1	0	0	0	1	1	15	0	0	0	0	0	0	0	0	0	999
0419822	12-JUL-13	11-SEP-13	12.4	10-SEP-13	136	10-SEP-13	133	11-SEP-13	2.23	11-SEP-13	6.7	11-SEP-13	92	11-SEP-13	93	11-SEP-13	549	11-SEP-13	1.5	11-SEP-13	1.67	Y	1.90211	1.90211	0.512824	0.512824	0.802002	0.802002	27.0387	27.0387	28.7496	29	1	1	1	0	0	3	51	0	0	0	0	0	0	0	0	0	999
0741910	23-APR-14	26-APR-14	7.2	26-APR-14	71	26-APR-14	137	26-APR-14	0.57	26-APR-14	1.4	24-APR-14	84	24-APR-14	57	24-APR-14	111	24-APR-14	2.9	24-APR-14	1.22		0.336472	0.336472	0.198851	0.198851	1	-0.562119	19.499	19.499	19.499	19	1	1	0	0	1	1	3	0	0	0	0	0	1	0	0	0	999
2107484	19-NOV-11	19-NOV-11	6.2	08-SEP-14	146	08-SEP-14	143	08-SEP-14	0.75	08-SEP-14	1.4	08-SEP-14	72	08-SEP-14	81	08-SEP-14	127	08-SEP-14	4.1	08-SEP-14	1.16	Y	0.336472	0.336472	0.14842	0.14842	1	-0.287682	18.9342	18.9342	14.7631	15	1	0	0	0	1	1	2	0	0	0	0	0	0	1	1	0	1
0306040	19-AUG-14	22-AUG-14	5.2	15-NOV-15	74	15-NOV-15	135	15-NOV-15	1.23	15-NOV-15	9999999	23-JUL-15	59	23-SEP-14	47	23-SEP-14	80	23-SEP-14	3.2	23-SEP-14	1.32		16.1181	16.1181	0.277632	0.277632	0.207014	0.207014	72.447	40	40	40	1	0	0	0	1	3	19	0	1	0	0	0	1	0	1	0	999
1370122	05-MAR-15	09-MAR-15	5.8	08-JUN-15	87	08-JUN-15	137	08-JUN-15	1.08	08-JUN-15	9999999	17-APR-15	177	17-APR-15	50	17-APR-15	127	17-APR-15	2.2	17-APR-15	1.29	Y	16.1181	16.1181	0.254642	0.254642	0.076961	0.076961	70.9449	40	40	40	1	1	1	1	1	4	18	0	2	0	0	0	0	0	0	1	999
0953642	28-APR-15	08-MAY-15	6.1	18-MAR-16	121	18-MAR-16	136	18-MAR-16	0.62	18-MAR-16	9999999	18-MAR-16	27	18-MAR-16	16	18-MAR-16	112	18-MAR-16	3	29-DEC-15	1.23	Y	16.1181	16.1181	0.207014	0.207014	1	-0.478036	79.245	40	40	40	2	0	1	0	0	6	84	2	2	0	0	0	1	0	0	0	999
0411160	04-MAY-15	05-MAY-15	15.1	28-AUG-15	9999999	28-AUG-15	138	27-AUG-15	1.08	27-AUG-15	9999999	27-AUG-15	35	27-AUG-15	27	27-AUG-15	58	27-AUG-15	4.2	27-AUG-15	1.07	Y	16.1181	16.1181	0.0676586	0.0676586	0.076961	0.076961	68.8507	40	40	40	2	1	0	1	1	1	2	0	0	0	0	0	0	0	0	0	999
0794285	12-FEB-09	17-FEB-09	2.7	05-AUG-16	43	05-AUG-16	136	05-AUG-16	1.17	05-AUG-16	2.1	05-AUG-16	53	05-AUG-16	30	05-AUG-16	65	05-AUG-16	3.8	03-DEC-15	1.32	Y	0.741937	0.741937	0.277632	0.277632	0.157004	0.157004	13.8465	13.8465	14.7096	15	1	0	0	0	1	1	2	0	0	0	0	0	1	1	0	0	999
1427399	11-MAR-14	19-MAR-14	10.6	03-MAR-16	9999999	03-MAR-16	135	03-MAR-16	0.6	03-MAR-16	4.3	03-MAR-16	77	03-MAR-16	35	03-MAR-16	731	03-MAR-16	1.4	10-DEC-15	1.23	Y	1.45862	1.45862	0.207014	0.207014	1	-0.510826	23.8321	23.8321	24.8992	25	1	1	0	1	1	9	110	3	3	0	0	1	1	0	1	0	999
0207621	26-MAY-15	23-JUN-15	4.7	18-AUG-16	161	18-AUG-16	138	04-JUN-16	0.65	04-JUN-16	9999999	02-JUN-16	69	05-AUG-15	28	05-AUG-15	123	05-AUG-15	2.8	05-AUG-15	1.13	Y	16.1181	16.1181	0.122218	0.122218	1	-0.430783	78.2952	40	40	40	1	1	1	0	1	4	43	1	0	0	0	0	0	0	0	0	999
0939150	23-MAY-09	29-MAY-09	4.9	29-MAY-09	9999999	29-MAY-09	136	29-MAY-09	0.65	29-MAY-09	9999999	23-MAY-09	30	23-MAY-09	7	23-MAY-09	99	23-MAY-09	4	02-JUN-09	1.21	Y	16.1181	16.1181	0.19062	0.19062	1	-0.430783	79.0613	40	40	40	1	0	0	0	0			0	0	0	0	0	0	0	0	0	999
1962968	14-JUN-09	16-JUN-09	5.1	05-JUL-09	64	05-JUL-09	137	05-JUL-09	1.09	05-JUL-09	9999999	05-JUL-09	115	05-JUL-09	100	05-JUL-09	164	05-JUL-09	2.4	05-JUL-09	1.51		16.1181	16.1181	0.41211	0.41211	0.0861777	0.0861777	72.7967	40	40	40	1	0	0	0	0			0	0	0	0	0	0	0	0	0	999
1994452	31-AUG-09	01-SEP-09	14.6	30-AUG-09	83	30-AUG-09	122	31-AUG-09	3.45	31-AUG-09	9999999	31-AUG-09	179	31-AUG-09	101	31-AUG-09	232	31-AUG-09	2.1	31-AUG-09	2.34	Y	16.1181	16.1181	0.850151	0.850151	1.23837	1.23837	88.7293	40	40	40	1	0	0	0	0			0	0	0	0	0	0	0	0	0	999
1958783	12-OCT-09	19-OCT-09	2	19-OCT-09	9999999	19-OCT-09	141	19-OCT-09	0.56	19-OCT-09	2.8	19-OCT-09	26	19-OCT-09	11	19-OCT-09	89	19-OCT-09	2.3	19-OCT-09	1.51	Y	1.02962	1.02962	0.41211	0.41211	1	-0.579818	24.5076	24.5076	22.4626	22	1	0	0	0	0			0	0	0	0	0	0	0	0	0	999
2024846	04-MAR-10	08-MAR-10	6.5	08-MAR-10	72	08-MAR-10	137	08-MAR-10	0.58	08-MAR-10	3.3	08-MAR-10	675	08-MAR-10	623	08-MAR-10	125	08-MAR-10	2	08-MAR-10	1.34	Y	1.19392	1.19392	0.29267	0.29267	1	-0.544727	23.7909	23.7909	23.7909	24	2	1	1	0	0	3	25	0	1	1	0	0	0	1	0	0	1
1593211	29-FEB-12	02-MAR-12	6.8	02-MAR-12	104	02-MAR-12	146	26-MAR-12	1.48	02-MAR-12	1.8	29-FEB-12	72	29-FEB-12	30	29-FEB-12	78	29-FEB-12	1.8	29-FEB-12	> 11.50		0.587787	0.587787	#VALUE!	#VALUE!	0.392042	0.392042	#VALUE!	#VALUE!	#VALUE!	#VALUE!	0	1	0	0	1	2	4	0	0	0	0	0	1	0	0	0	999
8180727	31-MAY-12	03-JUN-12	3.4	23-APR-13	103	23-APR-13	137	23-APR-13	1.18	23-APR-13	3.7	21-MAR-13	56	21-MAR-13	32	21-MAR-13	71	21-MAR-13	2.5	21-MAR-13	1.14	Y	1.30833	1.30833	0.131028	0.131028	0.165514	0.165514	14.427	14.427	14.427	14	1	0	1	0	0	4	15	1	0	0	0	0	0	0	1	0	999
1027367	08-APR-13	12-APR-13	11.2	11-APR-13	55	11-APR-13	128	11-APR-13	0.77	11-APR-13	5.7	09-APR-13	73	09-APR-13	56	09-APR-13	144	09-APR-13	2.2	09-APR-13	1.68		1.74047	1.74047	0.518794	0.518794	1	-0.261365	28.3895	28.3895	31.8378	32	1	0	0	0	0	1	4	0	0	0	0	0	0	0	0	1	999
1063738	18-JUN-13	21-JUN-13	5.8	21-JUN-13	141	21-JUN-13	129	21-JUN-13	1.25	21-JUN-13	0.8	21-JUN-13	21	21-JUN-13	11	21-JUN-13	89	21-JUN-13	3.5	21-JUN-13	1.31	Y	1	-0.223144	0.270027	0.270027	0.223144	0.223144	15.3698	15.3698	21.8722	22	1	0	0	0	1	1	3	0	0	0	0	0	0	1	1	0	999
2301387	31-MAR-14	05-APR-14	11.3	03-APR-14	51	03-APR-14	135	03-APR-14	0.6	03-APR-14	4.5	02-APR-14	94	02-APR-14	46	02-APR-14	126	02-APR-14	1.7	02-APR-14	1.54		1.50408	1.50408	0.431782	0.431782	1	-0.510826	26.5214	26.5214	27.411	27	0	0	0	1	1	1	5	0	0	0	1	0	0	1	1	0	1
2294796	14-FEB-14	09-APR-14	13.9	22-MAY-14	9999999	22-MAY-14	122	22-MAY-14	3.87	22-MAY-14	14.9	22-MAY-14	93	22-MAY-14	39	22-MAY-14	163	22-MAY-14	1	22-MAY-14	1.94	Y	2.70136	2.70136	0.662688	0.662688	1.35325	1.35325	37.0139	37.0139	38.492	38	1	0	0	0	1	2	60	1	0	0	0	0	1	1	1	0	1
2292789	03-APR-15	16-APR-15	5.4	16-APR-15	88	16-APR-15	133	16-APR-15	0.89	16-APR-15	9999999	15-APR-15	67	04-APR-15	54	04-APR-15	124	04-APR-15	1.7	15-APR-15	1.30	Y	16.1181	16.1181	0.262364	0.262364	1	-0.116534	79.8649	40	40	40	1	1	0	1	0	3	23	0	0	0	0	0	0	1	1	0	1
8112193	15-FEB-11	28-FEB-11	5	17-MAR-16	93	17-MAR-16	140	17-MAR-16	1.04	17-MAR-16	1.4	17-MAR-16	41	17-MAR-16	25	17-MAR-16	88	17-MAR-16	3.8	17-SEP-15	1.17	Y	0.336472	0.336472	0.157004	0.157004	0.0392207	0.0392207	9.83565	9.83565	6.84938	7	1	0	0	0	1	4	21	0	1	0	0	0	1	0	0	0	999
2136336	31-AUG-15	02-SEP-15	4.2	02-SEP-15	132	02-SEP-15	134	02-SEP-15	131.94	02-SEP-15	5.3	31-AUG-15	175	31-AUG-15	69	31-AUG-15	131	31-AUG-15	1.4	31-AUG-15	1.52		1.66771	1.66771	0.41871	0.41871	4.88235	4.88235	64.1476	40	40	40	1	0	0	0	1	2	4	0	0	0	0	0	1	0	1	0	999
1909292	21-MAR-14	22-MAR-14	5	02-OCT-15	66	02-OCT-15	138	02-OCT-15	1.01	02-OCT-15	1.7	02-OCT-15	34	02-OCT-15	17	02-OCT-15	98	02-OCT-15	2.5	02-OCT-15	1.36	Y	0.530628	0.530628	0.307485	0.307485	0.00995033	0.00995033	11.9748	11.9748	11.05	11	1	1	0	0	1	2	3	0	0	0	0	0	0	1	1	0	1
7120098	27-NOV-15	01-DEC-15	15.1	30-NOV-15	9999999	30-NOV-15	137	30-NOV-15	0.72	30-NOV-15	0.5	30-NOV-15	17	30-NOV-15	9	30-NOV-15	150	30-NOV-15	1.6	30-NOV-15	1.34	Y	1	-0.693147	0.29267	0.29267	1	-0.328504	23.0579	23.0579	23.0579	23	2	0	0	0	0	1	4	0	0	0	0	0	0	0	1	1	999
1788074	11-DEC-08	19-DEC-08	6.4	17-DEC-08	52	17-DEC-08	142	19-DEC-08	1.1	19-DEC-08	4.7	19-DEC-08	90	19-DEC-08	61	19-DEC-08	205	19-DEC-08	16	28-DEC-08	1.42	Y	1.54756	1.54756	0.350657	0.350657	0.0953102	0.0953102	17.1193	17.1193	13.3439	13	1	0	0	0	0			0	0	0	0	0	0	0	0	0	999
1997220	18-AUG-09	03-SEP-09	13.6	01-SEP-09	9999999	01-SEP-09	137	01-SEP-09	1.95	01-SEP-09	25.2	01-SEP-09	103	01-SEP-09	70	01-SEP-09	164	01-SEP-09	2.6	01-SEP-09	1.57	Y	3.22684	3.22684	0.451076	0.451076	0.667829	0.667829	30.0706	30.0706	30.0706	30	0	0	0	0	0	1	16	0	0	0	1	0	0	0	0	0	999
1329945	10-FEB-10	12-FEB-10	11.8	11-FEB-10	171	11-FEB-10	134	11-FEB-10	0.5	11-FEB-10	1.2	11-FEB-10	33	11-FEB-10	20	11-FEB-10	196	11-FEB-10	9999999	11-FEB-10	1.05		0.182322	0.182322	0.0487902	0.0487902	1	-0.693147	17.2356	17.2356	19.4893	19	1	1	1	0	1	1	2	0	0	0	1	0	0	0	0	0	999
0797666	01-MAR-10	03-MAR-10	7.5	08-APR-10	141	08-APR-10	125	08-APR-10	0.66	08-APR-10	9999999	02-MAR-10	140	01-MAR-10	36	01-MAR-10	117	01-MAR-10	9999999	02-MAR-10	1.12	Y	16.1181	16.1181	0.113329	0.113329	1	-0.415515	78.1957	40	40	40	3	0	0	0	1	1	2	0	0	0	0	0	0	0	1	0	999
1667967	26-MAY-10	29-MAY-10	5.8	24-AUG-10	9999999	24-AUG-10	137	24-AUG-10	0.5	24-AUG-10	1.4	24-AUG-10	119	24-AUG-10	51	24-AUG-10	135	24-AUG-10	2.9	24-AUG-10	1.21	Y	0.336472	0.336472	0.19062	0.19062	1	-0.693147	19.4068	19.4068	19.4068	19	1	0	0	0	1	2	4	1	0	0	0	0	0	1	0	1	999
0436067	08-APR-11	11-APR-11	6.7	11-APR-11	9999999	11-APR-11	139	11-APR-11	7.39	11-APR-11	24.8	11-APR-11	53	11-APR-11	39	11-APR-11	77	11-APR-11	2	11-APR-11	1.48	Y	3.21084	3.21084	0.392042	0.392042	2.00013	2.00013	42.0991	40	40	40	1	0	0	0	1	3	9	1	0	0	0	0	1	1	1	0	1
0280134	12-SEP-12	14-SEP-12	21.7	27-SEP-12	9999999	27-SEP-12	140	27-SEP-12	2.55	27-SEP-12	9999999	26-SEP-12	46	19-SEP-12	44	19-SEP-12	245	19-SEP-12	2.4	19-SEP-12	1.67	Y	16.1181	16.1181	0.512824	0.512824	0.936093	0.936093	82.0584	40	40	40	1	0	0	0	0	6	17	4	0	0	1	0	1	0	0	0	999
1971074	26-OCT-12	05-NOV-12	3.3	01-NOV-12	108	01-NOV-12	131	05-NOV-12	1.55	05-NOV-12	9999999	27-OCT-12	150	26-OCT-12	43	26-OCT-12	174	26-OCT-12	9999999	21-NOV-12	1.23		16.1181	16.1181	0.207014	0.207014	0.438255	0.438255	73.8691	40	40	40	1	0	1	0	0	2	16	0	0	0	0	0	0	1	1	1	999
2202886	19-DEC-12	22-DEC-12	8.5	22-DEC-12	9999999	22-DEC-12	135	22-DEC-12	0.53	22-DEC-12	2.3	20-DEC-12	337	20-DEC-12	147	20-DEC-12	131	20-DEC-12	1.7	20-DEC-12	1.37	Y	0.832909	0.832909	0.314811	0.314811	1	-0.634878	22.6743	22.6743	23.8178	24	0	0	1	0	1	1	3	0	0	0	0	0	1	1	1	1	999
1310099	07-DEC-13	13-DEC-13	15.1	27-JAN-14	160	27-JAN-14	132	27-JAN-14	1.71	27-JAN-14	9999999	20-JAN-14	21	09-JAN-14	14	09-JAN-14	124	09-JAN-14	3.5	09-JAN-14	3.83	Y	16.1181	16.1181	1.34286	1.34286	0.536493	0.536493	87.5307	40	40	40	1	1	1	1	0	8	72	5	0	0	1	0	0	0	1	0	999
0540220	03-MAY-14	24-JUN-14	6.7	05-JUL-15	110	05-JUL-15	140	05-JUL-15	0.93	05-JUL-15	1.2	14-JUL-14	27	14-JUL-14	14	14-JUL-14	130	14-JUL-14	2.1	14-JUL-14	1.15		0.182322	0.182322	0.139762	0.139762	1	-0.0725707	18.2545	18.2545	16.1017	16	1	1	1	1	1	6	72	1	2	0	0	0	1	0	1	0	999
2264146	14-JUL-14	16-JUL-14	6.1	10-SEP-14	72	10-SEP-14	129	18-MAR-15	0.77	10-SEP-14	1.4	10-SEP-14	29	10-SEP-14	20	10-SEP-14	89	10-SEP-14	2.8	10-SEP-14	1.22		0.336472	0.336472	0.198851	0.198851	1	-0.261365	19.499	19.499	24.9113	25	2	0	0	1	1	2	3	1	0	0	0	0	0	1	1	0	1
0897589	18-FEB-15	21-FEB-15	7	24-AUG-15	142	24-AUG-15	141	11-MAY-16	0.66	11-MAY-16	1.3	24-AUG-15	35	24-AUG-15	23	24-AUG-15	97	24-AUG-15	3.9	24-AUG-15	1.16	Y	0.262364	0.262364	0.14842	0.14842	1	-0.415515	18.654	18.654	15.8364	16	1	0	0	0	1	4	15	0	2	0	0	0	1	1	1	0	1
2196184	12-JUN-14	16-JUN-14	5.1	31-AUG-15	134	31-AUG-15	140	31-AUG-15	0.95	31-AUG-15	9999999	31-AUG-15	45	31-AUG-15	32	31-AUG-15	95	31-AUG-15	3.5	31-AUG-15	1.01		16.1181	16.1181	0.00995033	0.00995033	1	-0.0512933	77.0378	40	40	40	1	0	0	0	1	1	4	0	0	0	0	0	0	0	1	0	999
8184809	08-OCT-10	26-OCT-10	12.9	25-OCT-10	9999999	25-OCT-10	148	25-OCT-10	2.63	25-OCT-10	3.6	23-OCT-10	94	23-OCT-10	46	23-OCT-10	52	23-OCT-10	2.9	23-OCT-10	1.39	Y	1.28093	1.28093	0.329304	0.329304	0.966984	0.966984	24.2142	24.2142	18.4839	18	0	1	0	0	1	3	22	1	0	0	1	0	1	1	1	0	1
2113005	08-MAR-12	11-MAR-12	3.9	11-MAR-12	99	11-MAR-12	131	11-MAR-12	536	11-MAR-12	2	11-MAR-12	54	11-MAR-12	27	11-MAR-12	73	11-MAR-12	2.3	11-MAR-12	1.22		0.693147	0.693147	0.198851	0.198851	6.28413	6.28413	71.4164	40	40	40	0	0	0	0	1	1	3	0	0	0	0	0	1	0	1	0	999
1067343	20-APR-12	29-APR-12	9.1	28-APR-12	9999999	28-APR-12	145	28-APR-12	8.13	28-APR-12	27.3	28-APR-12	109	28-APR-12	34	28-APR-12	77	28-APR-12	2.9	28-APR-12	2.54	Y	3.30689	3.30689	0.932164	0.932164	2.09556	2.09556	49.4248	40	40	40	1	0	0	0	0	1	9	0	0	0	1	0	1	1	1	0	1
2066518	17-NOV-11	18-NOV-11	5.1	03-MAY-12	9999999	03-MAY-12	139	03-MAY-12	0.7	03-MAY-12	0.9	03-MAY-12	32	03-MAY-12	27	03-MAY-12	74	03-MAY-12	4	03-MAY-12	1.21	Y	1	-0.105361	0.19062	0.19062	1	-0.356675	21.9149	21.9149	20.7213	21	1	1	0	0	1	6	13	3	1	0	0	0	1	0	0	0	999
0891576	01-DEC-12	03-DEC-12	5.2	03-DEC-12	49	03-DEC-12	137	03-DEC-12	0.92	03-DEC-12	2.7	02-DEC-12	82	02-DEC-12	54	02-DEC-12	121	02-DEC-12	2.6	02-DEC-12	1.10		0.993252	0.993252	0.0953102	0.0953102	1	-0.0833816	20.822	20.822	20.822	21	1	1	0	1	1	1	2	0	0	0	0	0	0	0	0	0	999
1507698	12-NOV-11	13-NOV-11	6	08-SEP-14	135	08-SEP-14	138	08-SEP-14	0.48	08-SEP-14	2.3	08-SEP-14	64	08-SEP-14	86	08-SEP-14	319	08-SEP-14	3.6	08-SEP-14	1.10	Y	0.832909	0.832909	0.0953102	0.0953102	1	-0.733969	20.2159	20.2159	19.563	20	1	0	0	0	0	8	34	3	1	0	0	0	1	1	1	0	0
0499924	20-DEC-13	27-DEC-13	10.8	27-DEC-13	9999999	27-DEC-13	138	27-DEC-13	2.91	27-DEC-13	6.9	27-DEC-13	255	27-DEC-13	70	27-DEC-13	44	27-DEC-13	3.7	27-DEC-13	3.44	Y	1.93152	1.93152	1.23547	1.23547	1.06815	1.06815	37.7907	37.7907	37.7177	38	1	0	0	1	1	4	23	2	1	0	0	1	1	0	1	0	999
0155013	28-APR-14	30-APR-14	4	30-APR-14		30-APR-14	138	30-APR-14	0.56	30-APR-14	9999999	28-APR-14	96	28-APR-14	69	28-APR-14	145	28-APR-14	3.2	28-APR-14	1.29		16.1181	16.1181	0.254642	0.254642	1	-0.579818	79.7784	40	40	40	2	0	0	0	1	2	4	0	0	0	0	0	1	0	0	0	999
7008339	28-AUG-14	26-SEP-14	10.5	25-SEP-14	217	25-SEP-14	131	25-SEP-14	0.7	25-SEP-14	1.9	22-SEP-14	54	22-SEP-14	31	22-SEP-14	91	22-SEP-14	2	22-SEP-14	1.26	Y	0.641854	0.641854	0.231112	0.231112	1	-0.356675	21.0147	21.0147	24.7738	25	1	0	0	0	1	2	50	0	1	0	0	0	1	1	1	0	0
2282997	17-NOV-14	21-NOV-14	10.4	20-NOV-14	99	20-NOV-14	135	21-NOV-14	1.08	21-NOV-14	2.9	21-NOV-14	118	21-NOV-14	80	21-NOV-14	164	21-NOV-14	2.3	21-NOV-14		Y	1.06471	1.06471	1	#NUM!	0.076961	0.076961	22.3911	22.3911	23.5533	24	1	1	0	0	1	2	5	1	0	0	0	0	1	1	1	1	0
1267721	09-JUN-15	20-JUN-15	6.2	08-JUN-16	9999999	08-JUN-16	150	08-JUN-16	0.61	08-JUN-16	4.8	08-JUN-16	44	08-JUN-16	21	08-JUN-16	61	08-JUN-16	2.6	16-JUN-15	1.25	Y	1.56862	1.56862	0.223144	0.223144	1	-0.494296	24.4286	24.4286	17.7484	18	2	0	1	1	1	10	95	2	2	0	1	0	1	1	1	0	1
1695320	03-DEC-15	03-DEC-15	7.1	03-DEC-15	160	03-DEC-15	132	03-DEC-15	1.45	03-DEC-15	9999999	03-DEC-15	56	03-DEC-15	25	03-DEC-15	112	03-DEC-15	2.2	03-DEC-15	1.41	Y	16.1181	16.1181	0.34359	0.34359	0.371564	0.371564	74.7605	40	40	40	1	1	0	0	0	6	35	0	2	0	0	0	0	1	1	0	1
0599503	17-APR-15	19-APR-15	5	07-DEC-15	101	07-DEC-15	139	07-DEC-15	0.65	07-DEC-15	2.2	07-DEC-15	95	07-DEC-15	40	07-DEC-15	209	07-DEC-15	3.8	07-DEC-15	1.10	Y	0.788457	0.788457	0.0953102	0.0953102	1	-0.430783	20.0478	20.0478	18.731	19	1	0	0	1	1	3	9	0	0	0	0	0	1	1	1	0	1
1905069	07-JUN-08	13-JUN-08	8.5	20-JUN-08	193	20-JUN-08	132	20-JUN-08	1.4	20-JUN-08	5.2	20-JUN-08	311	20-JUN-08	116	20-JUN-08	187	20-JUN-08	2.3	20-JUN-08	1.16		1.64866	1.64866	0.14842	0.14842	0.336472	0.336472	17.5443	17.5443	21.2495	21	0	0	1	1	0	1	6	0	0	0	0	1	1	0	1	0	999
1167257	31-MAR-09	04-APR-09	7.5	08-APR-09	103	08-APR-09	136	08-APR-09	1.14	08-APR-09	3.2	08-APR-09	38	08-APR-09	29	08-APR-09	137	08-APR-09	2.3	08-APR-09	1.40		1.16315	1.16315	0.336472	0.336472	0.131028	0.131028	15.8491	15.8491	16.6461	17	0	1	0	0	1	1	1	0	0	0	0	0	1	0	0	0	999
1804150	08-APR-09	24-APR-09	22.3	22-APR-09	9999999	22-APR-09	144	22-APR-09	1.36	22-APR-09	2.1	22-APR-09	43	22-APR-09	35	22-APR-09	110	22-APR-09	1.2	22-APR-09	1.50	Y	0.741937	0.741937	0.405465	0.405465	0.307485	0.307485	16.7184	16.7184	11.3403	11	0	1	0	1	1	1	9	0	0	0	1	0	1	0	0	0	999
1495516	15-APR-09	22-MAY-09	2.8	09-JUN-09	87	09-JUN-09	140	09-JUN-09	0.65	09-JUN-09	2.6	09-JUN-09	147	09-JUN-09	47	09-JUN-09	92	09-JUN-09	2.5	09-JUN-09	1.43	Y	0.955511	0.955511	0.357674	0.357674	1	-0.430783	23.6178	23.6178	21.9959	22	0	1	0	0	1	1	37	0	0	0	0	0	1	0	0	0	999
1806248	23-APR-10	26-APR-10	4.1	25-APR-10	9999999	25-APR-10	131	25-APR-10	2.22	25-APR-10	25.3	25-APR-10	175	25-APR-10	33	25-APR-10	168	25-APR-10	2.8	25-APR-10	2.52		3.2308	3.2308	0.924259	0.924259	0.797507	0.797507	36.6263	36.6263	37.2943	37	0	1	0	0	1	2	7	1	0	0	1	0	1	1	1	1	1
1710467	26-NOV-10	01-DEC-10	8.6	01-DEC-10	123	01-DEC-10	131	01-DEC-10	0.95	01-DEC-10	9999999	26-NOV-10	45	15-OCT-10	31	15-OCT-10	142	15-OCT-10	2	28-NOV-10	1.26	Y	16.1181	16.1181	0.231112	0.231112	1	-0.0512933	79.5149	40	40	40	2	1	1	1	1	4	18	1	0	0	0	1	1	0	1	0	999
8480760	31-MAR-11	03-APR-11	27.2	20-JUN-11	9999999	20-JUN-11	134	20-JUN-11	1.87	20-JUN-11	1.9	19-JUN-11	271	19-JUN-11	44	19-JUN-11	202	19-JUN-11	1.5	19-JUN-11	1.58	Y	0.641854	0.641854	0.457425	0.457425	0.625938	0.625938	19.9696	19.9696	21.9526	22	1	1	0	0	1	2	16	0	1	0	1	0	0	0	0	0	999
8004670	11-DEC-11	18-JAN-12	8.3	17-JAN-12	56	17-JAN-12	136	17-JAN-12	3.88	17-JAN-12	17	17-JAN-12	73	17-JAN-12	20	17-JAN-12	72	17-JAN-12	2.7	17-JAN-12	1.64	Y	2.83321	2.83321	0.494696	0.494696	1.35584	1.35584	35.6555	35.6555	35.7989	36	1	0	0	0	1	2	38	0	0	0	0	1	1	0	0	0	999
1070171	20-APR-12	07-MAY-12	6.1	07-MAY-12	9999999	07-MAY-12	131	07-MAY-12	1.61	07-MAY-12	36.6	07-MAY-12	103	07-MAY-12	35	07-MAY-12	60	07-MAY-12	2.9	07-MAY-12	2.73	Y	3.60005	3.60005	1.0043	1.0043	0.476234	0.476234	35.8439	35.8439	36.6668	37	0	0	0	0	1	2	27	1	0	0	0	1	1	1	1	0	1
0663977	24-JUL-13	08-AUG-13	4.8	11-OCT-13	153	11-OCT-13	142	11-OCT-13	0.85	11-OCT-13	2.2	11-OCT-13	31	11-OCT-13	17	11-OCT-13	89	11-OCT-13	3.1	11-OCT-13	1.56	Y	0.788457	0.788457	0.444686	0.444686	1	-0.162519	23.9609	23.9609	21.3144	21	1	0	1	1	1	1	15	0	0	0	0	0	1	0	0	0	999
2306348	02-JUL-14	02-JUL-14	2.5	02-JUL-14	9999999	02-JUL-14	138	02-JUL-14	0.66	02-JUL-14	0.8	02-JUL-14	55	02-JUL-14	54	02-JUL-14	90	02-JUL-14	2.6	02-JUL-14	1.12		1	-0.223144	0.113329	0.113329	1	-0.415515	21.0493	21.0493	20.4239	20	1	0	0	0	1	1	2	0	0	0	0	0	0	1	1	0	1
8459583	27-NOV-13	02-DEC-13	2.7	22-SEP-14	159	22-SEP-14	140	12-APR-16	1.26	12-APR-16	0.8	30-DEC-15	18	30-DEC-15	16	30-DEC-15	47	30-DEC-15	4.1	30-DEC-15	0.98	Y	1	-0.223144	-0.0202027	-0.0202027	0.231112	0.231112	12.1955	12.1955	9.44282	9	1	0	0	0	1	15	90	5	6	1	0	0	1	1	1	0	1
0852853	14-SEP-15	24-SEP-15	10.1	24-SEP-15		05-OCT-15	133	24-SEP-15	1.9	24-SEP-15	5.8	23-SEP-15	532	23-SEP-15	48	23-SEP-15	533	23-SEP-15	9999999	23-SEP-15	2.10	Y	1.75786	1.75786	0.741937	0.741937	0.641854	0.641854	27.5269	27.5269	29.1734	29	2	1	0	0	0	1	10	0	0	0	1	0	0	0	1	0	999
1514249	14-NOV-15	16-NOV-15	4.4	01-JUN-16	98	01-JUN-16	138	17-FEB-16	0.73	17-FEB-16	9999999	03-JUN-16	49	01-JUN-16	44	01-JUN-16	71	01-JUN-16	3.5	10-DEC-15	1.21		16.1181	16.1181	0.19062	0.19062	1	-0.314711	79.0613	40	40	40	1	2	0	0	0	2	6	0	0	0	0	0	1	0	0	0	999
1051745	17-NOV-14	04-DEC-14	7.9	19-NOV-15	9999999	19-NOV-15	134	18-NOV-15	1.37	18-NOV-15	3.3	18-NOV-15	45	18-NOV-15	20	18-NOV-15	109	18-NOV-15	1.6	18-NOV-15	1.56	Y	1.19392	1.19392	0.444686	0.444686	0.314811	0.314811	18.9362	18.9362	21.0216	21	1	0	0	0	1	4	36	1	0	0	0	0	1	0	1	0	999
1020406	22-DEC-08	24-DEC-08	4.9	15-JUN-09	120	15-JUN-09	138	15-JUN-09	0.61	15-JUN-09	9999999	04-JUN-09	82	04-JUN-09	69	04-JUN-09	46	04-JUN-09	2.3	04-JUN-09	1.53		16.1181	16.1181	0.425268	0.425268	1	-0.494296	81.6894	40	40	40	1	1	0	0	0	2	8	0	0	0	0	0	1	1	1	0	999
2011016	13-NOV-09	16-NOV-09	3.4	16-NOV-09	38	16-NOV-09	134	30-NOV-09	1.33	30-NOV-09	2.1	30-NOV-09	46	30-NOV-09	21	30-NOV-09	79	30-NOV-09	2.2	30-NOV-09	1.24		0.741937	0.741937	0.215111	0.215111	0.285179	0.285179	14.3729	14.3729	16.91	17	0	0	0	0	1	1	3	0	0	0	0	0	1	1	1	0	1
2016041	04-MAR-10	08-MAR-10	8.5	08-MAR-10	109	08-MAR-10	137	08-MAR-10	0.9	08-MAR-10	9999999	04-MAR-10	51	04-MAR-10	24	04-MAR-10	83	04-MAR-10	2.1	04-MAR-10	1.77		16.1181	16.1181	0.57098	0.57098	1	-0.105361	83.3214	40	40	40	0	0	0	0	1	1	4	0	0	0	0	0	1	0	1	0	999
2069020	25-FEB-11	08-MAR-11	9.8	06-MAR-11	9999999	06-MAR-11	136	06-MAR-11	4.16	06-MAR-11	2.5	06-MAR-11	21	06-MAR-11	20	06-MAR-11	89	06-MAR-11	2	06-MAR-11	1.84	Y	0.916291	0.916291	0.609766	0.609766	1.42552	1.42552	30.3651	30.3651	30.6831	31	0	0	1	0	0	1	11	0	0	0	1	0	1	0	0	0	999
0742263	10-AUG-11	16-AUG-11	7.8	16-AUG-11	152	16-AUG-11	131	16-AUG-11	0.74	16-AUG-11	1.7	16-AUG-11	76	16-AUG-11	35	16-AUG-11	157	16-AUG-11	1.2	16-AUG-11	1.51		0.530628	0.530628	0.41211	0.41211	1	-0.301105	22.6214	22.6214	26.0624	26	2	0	0	0	1	3	17	1	0	0	0	0	1	1	0	0	1
0256740	10-AUG-11	17-AUG-11	8.4	17-AUG-11	49	17-AUG-11	138	17-AUG-11	0.66	17-AUG-11	1.5	17-AUG-11	94	17-AUG-11	44	17-AUG-11	164	17-AUG-11	1.3	17-AUG-11	1.57	Y	0.405465	0.405465	0.451076	0.451076	1	-0.415515	22.5847	22.5847	22.01	22	1	1	1	0	1	1	7	0	0	0	0	0	1	0	0	0	999
1909091	27-OCT-11	03-NOV-11	10.4	19-JAN-12	111	19-JAN-12	134	20-JAN-12	2.44	20-JAN-12	9999999	02-JAN-12	61	02-JAN-12	55	02-JAN-12	193	02-JAN-12	1.7	02-JAN-12	1.22	Y	16.1181	16.1181	0.198851	0.198851	0.891998	0.891998	78.12	40	40	40	1	1	1	0	1	4	44	2	1	0	0	0	1	1	0	0	999
2060872	17-JUN-11	21-JUN-11	9.7	08-JAN-12	9999999	08-JAN-12	142	08-JAN-12	0.99	08-JAN-12	41.7	08-JAN-12	287	08-JAN-12	92	08-JAN-12	52	08-JAN-12	2.1	08-JAN-12	2.90	Y	3.7305	3.7305	1.06471	1.06471	1	-0.0100503	42.0261	40	40	40	1	0	0	0	1	2	21	0	0	0	0	0	1	1	1	0	1
1192251	12-JAN-12	13-JAN-12	6.5	11-MAY-12	136	11-MAY-12	134	11-MAY-12	1.14	11-MAY-12	1.4	11-MAY-12	52	11-MAY-12	36	11-MAY-12	62	11-MAY-12	3.1	11-MAY-12	1.05	Y	0.336472	0.336472	0.0487902	0.0487902	0.131028	0.131028	9.50226	9.50226	12.5215	13	2	1	0	1	0	2	5	0	0	0	0	0	0	1	0	1	1
1713312	30-JAN-13	03-FEB-13	6.5	13-FEB-13	46	13-FEB-13	136	13-FEB-13	4.35	13-FEB-13	4.5	13-FEB-13	51	13-FEB-13	57	13-FEB-13	402	13-FEB-13	1.7	13-FEB-13	1.27	Y	1.50408	1.50408	0.239017	0.239017	1.47018	1.47018	28.862	28.862	29.2295	29	0	1	0	0	1	1	4	0	0	0	0	0	1	0	1	0	999
0338421	20-FEB-13	24-FEB-13	22.7	24-FEB-13	9999999	24-FEB-13	147	24-FEB-13	2.93	24-FEB-13	21.3	24-FEB-13	5985	24-FEB-13	1103	24-FEB-13	249	24-FEB-13	1.9	24-FEB-13	> 11.50	Y	3.05871	3.05871	#VALUE!	#VALUE!	1.075	1.075	#VALUE!	#VALUE!	#VALUE!	#VALUE!	1	0	0	0	1	1	4	0	0	0	1	0	1	0	1	1	999
0885394	01-APR-13	09-APR-13	4.4	29-MAY-13	118	29-MAY-13	135	29-MAY-13	3.32	29-MAY-13	1	01-APR-13	15	01-APR-13	11	01-APR-13	104	01-APR-13	2.1	04-APR-13	1.14	Y	0	0	0.131028	0.131028	1.19996	1.19996	19.3812	19.3812	20.742	21	1	1	1	0	0	1	8	0	0	0	0	0	0	0	1	0	999
0302477	27-AUG-13	06-SEP-13	5.8	05-SEP-13	9999999	05-SEP-13	144	05-SEP-13	1.61	05-SEP-13	11.9	05-SEP-13	200	05-SEP-13	52	05-SEP-13	88	05-SEP-13	1.3	05-SEP-13	1.69	Y	2.47654	2.47654	0.524729	0.524729	0.476234	0.476234	26.2258	26.2258	23.044	23	3	1	1	0	1	1	10	0	0	0	0	0	1	0	1	0	999
0272570	19-NOV-12	22-NOV-12	3.5	19-NOV-13	120	19-NOV-13	138	19-NOV-13	1.15	19-NOV-13	9999999	17-NOV-13	53	17-NOV-13	30	17-NOV-13	104	17-NOV-13	2	17-NOV-13	1.18	Y	16.1181	16.1181	0.165514	0.165514	0.139762	0.139762	70.5477	40	40	40	2	0	0	0	1	3	8	0	0	0	0	0	0	1	1	0	1
1772195	09-NOV-08	18-NOV-08	8.4	22-JUL-14	9999999	22-JUL-14	133	22-JUL-14	0.55	22-JUL-14	9999999	15-JUL-14	50	15-JUL-14	29	15-JUL-14	85	15-JUL-14	3.2	15-JUL-14	1.34		16.1181	16.1181	0.29267	0.29267	1	-0.597837	80.2043	40	40	40	3	1	0	1	1	5	26	0	1	0	0	0	0	0	0	0	999
1546538	23-APR-14	02-MAY-14	8	08-AUG-14	9999999	08-AUG-14	140	08-AUG-14	2.73	08-AUG-14	0.6	08-AUG-14	26	08-AUG-14	16	08-AUG-14	327	08-AUG-14	3.9	08-AUG-14	1.02	Y	1	-0.510826	0.0198026	0.0198026	1.0043	1.0043	20.043	20.043	18.0672	18	1	1	1	1	0	3	60	1	1	1	0	1	1	1	1	0	1
8255329	28-SEP-14	03-OCT-14	9.2	01-DEC-14	249	01-DEC-14	137	01-DEC-14	0.81	01-DEC-14	1.4	01-DEC-14	39	01-DEC-14	26	01-DEC-14	58	01-DEC-14	3.9	01-DEC-14	1.27		0.336472	0.336472	0.239017	0.239017	1	-0.210721	19.9489	19.9489	19.9489	20	1	0	0	0	0			0	0	0	0	0	0	0	0	0	999
1401508	16-OCT-14	27-OCT-14	18.4	27-OCT-14	9999999	27-OCT-14	138	27-OCT-14	1.45	27-OCT-14	3.1	27-OCT-14	77	27-OCT-14	31	27-OCT-14	151	27-OCT-14	2.3	27-OCT-14	2.21		1.1314	1.1314	0.792993	0.792993	0.371564	0.371564	23.1441	23.1441	22.5878	23	1	0	0	0	0	1	11	0	0	0	1	0	1	1	1	0	1
7060048	17-MAR-15	25-MAR-15	11.4	31-MAR-15	96	31-MAR-15	132	31-MAR-15	0.85	31-MAR-15	7.3	31-MAR-15	67	31-MAR-15	43	31-MAR-15	106	31-MAR-15	2.8	31-MAR-15	1.79	Y	1.98787	1.98787	0.582216	0.582216	1	-0.162519	30.035	30.035	31.6792	32	1	0	0	0	1	1	8	0	0	0	0	0	1	0	1	0	999
1484305	21-SEP-11	27-SEP-11	8.1	14-AUG-15	200	14-AUG-15	136	14-AUG-15	1.09	14-AUG-15	0.8	09-AUG-15	42	09-AUG-15	20	09-AUG-15	53	09-AUG-15	3.1	09-AUG-15	2.24	Y	1	-0.223144	0.806476	0.806476	0.0861777	0.0861777	20.0673	20.0673	20.725	21	1	1	1	0	1	8	46	1	2	0	0	0	0	0	0	0	999
0952716	08-NOV-15	10-NOV-15	8.7	16-AUG-16	9999999	16-AUG-16	136	16-AUG-16	0.67	16-AUG-16	4.2	16-AUG-16	80	16-AUG-16	36	16-AUG-16	322	16-AUG-16	2.3	08-NOV-15	1.13	Y	1.43508	1.43508	0.122218	0.122218	1	-0.400478	22.7935	22.7935	23.3613	23	2	0	0	0	1	5	21	2	0	1	0	0	1	1	0	0	0
1263604	12-NOV-08	14-NOV-08	3.7	30-DEC-08		30-DEC-08	140	30-DEC-08	0.61	30-DEC-08	9999999	30-DEC-08	65	30-DEC-08	58	30-DEC-08	61	30-DEC-08	2.9	30-DEC-08	1.28		16.1181	16.1181	0.24686	0.24686	1	-0.494296	79.6912	40	40	40	1	0	0	0	1	1	2	0	0	0	0	0	1	0	0	0	999
2051620	08-OCT-10	09-OCT-10	5.6	13-MAY-13	194	13-MAY-13	138	13-MAY-13	1.23	13-MAY-13	1.1	23-SEP-10	19	23-SEP-10	12	23-SEP-10	122	23-SEP-10	3	01-NOV-10	1.04		0.0953102	0.0953102	0.0392207	0.0392207	0.207014	0.207014	9.21067	9.21067	8.19462	8	1	0	0	1	1	2	4	1	0	0	0	0	0	0	0	0	999
1938042	31-JUL-11	03-AUG-11	7.1	03-AUG-11	85	03-AUG-11	131	03-AUG-11	0.89	03-AUG-11	28.4	03-AUG-11	59	03-AUG-11	34	03-AUG-11	75	03-AUG-11	3	03-AUG-11	2.87	Y	3.34639	3.34639	1.05431	1.05431	1	-0.116534	40.4576	40	40	40	2	0	0	0	0	1	3	0	0	0	0	0	1	1	1	0	1
0110012	30-APR-12	23-MAY-12	10.2	19-MAY-12	9999999	19-MAY-12	125	19-MAY-12	3.77	19-MAY-12	10.2	16-MAY-12	81	16-MAY-12	34	16-MAY-12	76	16-MAY-12	3.3	19-MAY-12	1.80		2.32239	2.32239	0.587787	0.587787	1.32708	1.32708	34.4919	34.4919	36.6731	37	1	0	0	0	1	1	23	0	0	0	1	0	1	0	0	0	999
0139941	05-AUG-14	15-AUG-14	3.5	15-AUG-14	51	15-AUG-14	134	15-AUG-14	0.66	15-AUG-14	5.4	06-AUG-14	39	06-AUG-14	25	06-AUG-14	68	06-AUG-14	2	06-AUG-14	1.95	Y	1.6864	1.6864	0.667829	0.667829	1	-0.415515	29.8543	29.8543	30.8587	31	2	0	0	0	1	1	10	0	0	0	0	0	1	0	0	0	999
0410974	14-SEP-14	17-SEP-14	6.6	15-JUN-15	104	15-JUN-15	136	15-JUN-15	0.74	15-JUN-15	9999999	15-JUN-15	41	17-SEP-14	21	17-SEP-14	135	17-SEP-14	1.9	17-SEP-14	1.19	Y	16.1181	16.1181	0.173953	0.173953	1	-0.301105	78.8747	40	40	40	2	0	0	0	1	1	3	0	0	0	0	0	1	1	1	0	999
1032820	13-JUL-09	14-JUL-09	6.3	19-APR-16	211	19-APR-16	136	19-APR-16	1.33	19-APR-16	0.3	19-APR-16	17	19-APR-16	16	19-APR-16	63	19-APR-16	4	17-DEC-15	0.93	Y	1	-1.20397	-0.0725707	-0.0725707	0.285179	0.285179	12.1264	12.1264	13.0462	13	1	0	1	0	0	5	19	2	0	0	0	0	1	0	1	0	999
7066231	17-JUL-15	23-JUL-15	13.8	23-JUL-15	9999999	23-JUL-15	137	23-JUL-15	1.08	23-JUL-15	0.8	23-JUL-15	80	23-JUL-15	27	23-JUL-15	206	23-JUL-15	2.2	23-JUL-15	1.09	Y	1	-0.223144	0.0861777	0.0861777	0.076961	0.076961	11.9117	11.9117	11.9117	12	1	1	0	0	0	1	6	0	0	0	0	1	0	0	0	0	999
0633541	07-OCT-15	14-OCT-15	5	25-MAY-16	66	25-MAY-16	138	25-MAY-16	0.81	25-MAY-16	2.2	25-MAY-16	60	25-MAY-16	44	25-MAY-16	88	25-MAY-16	1.4	29-OCT-15	1.86	Y	0.788457	0.788457	0.620576	0.620576	1	-0.210721	25.9308	25.9308	25.4665	25	2	0	0	0	0	4	28	1	0	0	0	0	1	1	1	0	1
1610804	02-NOV-15	05-NOV-15	8.3	05-NOV-15	106	05-NOV-15	134	05-NOV-15	1.1	05-NOV-15	30.8	05-NOV-15	360	05-NOV-15	199	05-NOV-15	90	05-NOV-15	1.8	05-NOV-15	1.50	Y	3.42751	3.42751	0.405465	0.405465	0.0953102	0.0953102	24.8393	24.8393	26.3402	26	1	0	1	0	0	1	3	0	0	0	0	0	1	1	1	0	1
1735552	08-JUL-10	23-JUL-10	6.8	23-JUL-10	9999999	23-JUL-10	135	23-JUL-10	3.87	23-JUL-10	9999999	18-JUL-10	36	16-JUL-10	23	16-JUL-10	56	16-JUL-10	3.6	16-JUL-10	1.74	Y	16.1181	16.1181	0.553885	0.553885	1.35325	1.35325	86.5106	40	40	40	1	0	0	0	1	1	15	0	0	0	0	0	1	0	0	0	999
1827736	03-JUL-10	07-JUL-10	5.8	02-AUG-10	55	02-AUG-10	134	02-AUG-10	5.71	02-AUG-10	2.4	02-AUG-10	26	02-AUG-10	24	02-AUG-10	149	02-AUG-10	1.6	02-AUG-10	2.84	Y	0.875469	0.875469	1.0438	1.0438	1.74222	1.74222	38.1029	38.1029	38.2907	38	0	0	1	0	1	1	4	0	0	0	0	0	0	0	1	0	999
1191709	17-OCT-11	27-OCT-11	9.8	20-OCT-11	9999999	20-OCT-11	131	20-OCT-11	2.67	20-OCT-11	9999999	17-OCT-11	162	17-OCT-11	115	17-OCT-11	435	17-OCT-11	1.2	17-OCT-11	2.04	Y	16.1181	16.1181	0.71295	0.71295	0.982078	0.982078	84.7399	40	40	40	1	0	0	0	1	1	10	0	0	0	1	0	1	1	0	0	1
0860381	06-SEP-10	07-SEP-10	9.5	20-NOV-11	95	20-NOV-11	127	22-NOV-11	0.98	22-NOV-11	16	28-NOV-11	151	28-NOV-11	61	28-NOV-11	190	28-NOV-11	1.5	28-NOV-11	1.93	Y	2.77259	2.77259	0.65752	0.65752	1	-0.0202027	33.8446	33.8446	35.8759	36	2	0	0	0	0	7	52	2	2	0	0	1	1	1	1	0	1
8232701	30-AUG-11	05-SEP-11	7	28-DEC-11	313	28-DEC-11	138	28-DEC-11	0.68	28-DEC-11	0.4	28-DEC-11	15	28-DEC-11	13	28-DEC-11	51	28-DEC-11	3.6	28-DEC-11	1.93	Y	1	-0.916291	0.65752	0.65752	1	-0.385662	27.1442	27.1442	26.72	27	1	0	0	0	0	1	6	0	0	0	0	0	0	0	0	0	999
0279708	11-FEB-12	12-FEB-12	2.7	12-FEB-12	9999999	12-FEB-12	136	12-FEB-12	0.78	12-FEB-12	2.5	10-FEB-12	52	10-FEB-12	31	10-FEB-12	102	10-FEB-12	2.7	10-FEB-12	1.17		0.916291	0.916291	0.157004	0.157004	1	-0.248461	21.222	21.222	21.8417	22	1	0	0	0	1	1	1	0	0	0	0	0	1	1	0	0	999
1790059	24-MAR-12	28-MAR-12	4.7	06-AUG-12	244	06-AUG-12	132	06-AUG-12	0.83	06-AUG-12	1.4	06-AUG-12	44	06-AUG-12	26	06-AUG-12	272	06-AUG-12	2.4	06-AUG-12	1.13	Y	0.336472	0.336472	0.122218	0.122218	1	-0.18633	18.6407	18.6407	22.165	22	2	0	0	0	0	1	4	0	0	0	0	0	0	1	0	1	999
0764655	01-JAN-13	07-JAN-13	8.4	15-AUG-14	251	15-AUG-14	135	15-AUG-14	1.04	15-AUG-14	0.8	15-AUG-14	46	15-AUG-14	32	15-AUG-14	72	15-AUG-14	4.2	15-AUG-14	1.03	Y	1	-0.223144	0.0295588	0.0295588	0.0392207	0.0392207	10.9164	10.9164	12.8359	13	2	1	0	0	1	1	6	0	0	0	0	0	0	0	0	0	999
2230466	01-APR-13	16-APR-13	25.2	21-MAY-13	9999999	21-MAY-13	140	21-MAY-13	5.83	21-MAY-13	8.9	21-MAY-13	35	21-MAY-13	7	21-MAY-13	94	21-MAY-13	2.1	21-MAY-13	2.23	Y	2.18605	2.18605	0.802002	0.802002	1.76302	1.76302	40.5478	40	40	40	1	0	0	0	1	4	42	3	0	0	1	0	1	0	1	0	999
2226737	12-JUL-13	16-JUL-13	12.5	15-JUL-13	60	15-JUL-13	140	15-JUL-13	3.35	15-JUL-13	7.5	15-JUL-13	134	15-JUL-13	38	15-JUL-13	39	15-JUL-13	3.9	15-JUL-13	2.97	Y	2.0149	2.0149	1.08856	1.08856	1.20896	1.20896	37.808	37.808	37.591	38	0	1	0	0	1	1	4	0	0	0	1	0	1	0	1	0	999
0494914	18-OCT-13	28-OCT-13	4.1	26-OCT-13	54	26-OCT-13	139	26-OCT-13	2.92	26-OCT-13	15.9	26-OCT-13	50	26-OCT-13	18	26-OCT-13	38	26-OCT-13	3.9	26-OCT-13	2.63	Y	2.76632	2.76632	0.966984	0.966984	1.07158	1.07158	37.972	37.972	37.8381	38	1	0	0	0	1	1	10	0	0	0	0	0	1	1	1	0	999
0496830	18-FEB-14	22-FEB-14	8.3	28-APR-15	65	28-APR-15	131	28-APR-15	1.77	28-APR-15	1.7	28-APR-15	24	28-APR-15	13	28-APR-15	92	28-APR-15	2.9	28-APR-15	1.29		0.530628	0.530628	0.254642	0.254642	0.57098	0.57098	16.752	16.752	21.3551	21	1	1	0	0	1	1	4	0	0	0	0	0	1	1	1	0	999
1458074	11-DEC-12	15-DEC-12	5.7	03-AUG-16	78	03-AUG-16	137	03-AUG-16	0.82	03-AUG-16	9999999	03-AUG-16	42	03-AUG-16	31	03-AUG-16	128	03-AUG-16	2.7	04-AUG-15	1.47		16.1181	16.1181	0.385262	0.385262	1	-0.198451	81.2413	40	40	40	1	0	1	0	1	1	4	0	0	0	0	0	1	1	1	0	1
8145065	18-MAY-11	28-MAY-11	4.9	08-DEC-14	106	08-DEC-14	132	08-DEC-14	0.69	08-DEC-14	8.5	08-DEC-14	56	08-DEC-14	30	08-DEC-14	168	08-DEC-14	1.7	08-DEC-14	1.97	Y	2.14007	2.14007	0.678034	0.678034	1	-0.371064	31.6834	31.6834	33.0557	33	1	0	0	0	1	1	10	0	0	0	0	0	0	1	1	0	999
0754768	13-SEP-15	03-OCT-15	5.2	09-DEC-15	139	09-DEC-15	136	09-DEC-15	54.07	09-DEC-15	1.2	09-DEC-15	40	09-DEC-15	15	09-DEC-15	89	09-DEC-15	2.8	09-DEC-15	1.23	Y	0.182322	0.182322	0.207014	0.207014	3.99028	3.99028	47.6247	40	40	40	2	1	1	0	0	2	43	0	1	0	1	0	0	1	1	0	1
1477350	04-MAR-15	09-MAR-15	5.3	18-JAN-16	122	18-JAN-16	130	18-JAN-16	0.45	18-JAN-16	9999999	16-JAN-16	89	16-JAN-16	29	16-JAN-16	230	16-JAN-16	3.6	03-DEC-15	1.01	Y	16.1181	16.1181	0.00995033	0.00995033	1	-0.798508	77.0378	40	40	40	1	0	0	0	1	2	7	0	0	0	0	0	0	0	1	0	999
2092028	03-JAN-15	06-JAN-15	4.1	14-MAR-16	64	14-MAR-16	135	14-MAR-16	0.77	14-MAR-16	1.5	13-FEB-16	28	13-FEB-16	21	13-FEB-16	71	13-FEB-16	2.8	27-DEC-15	1.16	Y	0.405465	0.405465	0.14842	0.14842	1	-0.261365	19.195	19.195	20.5681	21	1	1	1	0	1	4	38	0	2	0	0	1	0	1	1	0	1
2046104	12-OCT-15	16-OCT-15	1.9	02-MAY-16	9999999	02-MAY-16	138	14-JUL-16	1.08	14-JUL-16	1.9	02-MAY-16	60	02-MAY-16	41	02-MAY-16	103	02-MAY-16	3	21-DEC-15	1.35	Y	0.641854	0.641854	0.300105	0.300105	0.076961	0.076961	12.9539	12.9539	12.0614	12	2	0	0	0	0	2	7	0	0	0	0	0	0	1	1	0	999
2061159	01-DEC-10	07-DEC-10	10.3	07-DEC-10	262	07-DEC-10	141	07-DEC-10	4.73	07-DEC-10	9999999	01-DEC-10	31	01-DEC-10	13	01-DEC-10	75	01-DEC-10	2.5	01-DEC-10			16.1181	16.1181	1	#NUM!	1.55393	1.55393	93.4275	40	40	40	0	1	1	0	1	1	6	0	0	0	0	0	0	0	0	0	999
8087631	19-DEC-09	25-DEC-09	8.8	24-DEC-09	9999999	24-DEC-09	135	24-DEC-09	3.48	24-DEC-09	2.6	24-DEC-09	71	24-DEC-09	32	24-DEC-09	114	24-DEC-09	2.8	24-DEC-09	1.45	Y	0.955511	0.955511	0.371564	0.371564	1.24703	1.24703	26.1374	26.1374	27.0524	27	1	1	1	0	1	1	6	0	0	0	1	0	0	1	0	0	999
1105198	18-JAN-11	21-JAN-11	6.1	27-JAN-11	120	27-JAN-11	126	27-JAN-11	0.86	27-JAN-11	1.6	27-JAN-11	657	27-JAN-11	156	27-JAN-11	172	27-JAN-11	2.5	27-JAN-11	1.49	Y	0.470004	0.470004	0.398776	0.398776	1	-0.150823	22.2429	22.2429	28.6887	29	1	0	1	0	1	1	3	0	0	0	1	0	1	0	1	1	999
0983537	08-JAN-12	10-JAN-12	6.8	10-JAN-12	9999999	10-JAN-12	137	10-JAN-12	0.69	10-JAN-12	8.6	10-JAN-12	233	10-JAN-12	70	10-JAN-12	188	10-JAN-12	3.2	10-JAN-12	1.38	Y	2.15176	2.15176	0.322083	0.322083	1	-0.371064	27.741	27.741	27.741	28	1	0	0	0	1	6	44	2	2	0	0	0	1	1	1	0	1
2100224	05-JUL-12	20-JUL-12	7.6	18-JUL-12	9999999	18-JUL-12	140	18-JUL-12	2.43	18-JUL-12	10	18-JUL-12	41	18-JUL-12	22	18-JUL-12	61	18-JUL-12	3.9	18-JUL-12	1.73	Y	2.30259	2.30259	0.548121	0.548121	0.887891	0.887891	29.7699	29.7699	28.7571	29	2	0	0	0	0	1	15	0	0	0	0	0	0	1	1	0	999
0501720	15-OCT-12	31-OCT-12	10	30-OCT-12	101	30-OCT-12	130	30-OCT-12	2.53	30-OCT-12	33.9	30-OCT-12	45	30-OCT-12	18	30-OCT-12	41	30-OCT-12	2.4	30-OCT-12	1.61	Y	3.52342	3.52342	0.476234	0.476234	0.928219	0.928219	33.9654	33.9654	35.3594	35	2	0	1	1	1	1	16	0	0	0	1	0	0	1	1	0	999
1077395	10-NOV-12	18-NOV-12	28.5	17-NOV-12	150	17-NOV-12	130	17-NOV-12	3.8	17-NOV-12	9999999	17-NOV-12	180	17-NOV-12	53	17-NOV-12	175	17-NOV-12	3.8	17-NOV-12	2.70		16.1181	16.1181	0.993252	0.993252	1.335	1.335	91.2568	40	40	40	1	0	0	0	1	2	10	0	0	0	1	0	0	0	1	0	999
0420561	22-APR-13	03-MAY-13	7.7	28-MAY-13	9999999	28-MAY-13	135	28-MAY-13	0.58	28-MAY-13	5.6	28-MAY-13	649	28-MAY-13	155	28-MAY-13	127	28-MAY-13	3.5	28-MAY-13	4.32	Y	1.72277	1.72277	1.46326	1.46326	1	-0.544727	38.9005	38.9005	38.9731	39	1	1	1	1	1	3	23	2	0	0	1	0	1	1	0	0	1
2244284	01-JUL-13	13-JUL-13	5.6	13-JUL-13	9999999	13-JUL-13	136	13-JUL-13	0.68	13-JUL-13	9999999	10-JUL-13	88	09-JUL-13	32	09-JUL-13	93	09-JUL-13	2.3	09-JUL-13	1.62	Y	16.1181	16.1181	0.482426	0.482426	1	-0.385662	82.3296	40	40	40	0	0	0	0	0	1	12	0	0	0	0	0	0	1	0	1	0, because low bps
0655915	01-SEP-13	06-SEP-13	12.9	04-SEP-13	44	04-SEP-13	137	04-SEP-13	1.94	04-SEP-13	21.9	04-SEP-13	664	04-SEP-13	185	04-SEP-13	254	04-SEP-13	3.1	04-SEP-13	1.74	Y	3.08649	3.08649	0.553885	0.553885	0.662688	0.662688	30.6424	30.6424	30.6424	31	1	0	1	0	0	1	5	0	0	0	1	0	1	1	0	0	999
2283800	01-DEC-13	11-DEC-13	8.6	27-AUG-14	9999999	27-AUG-14	137	27-AUG-14	0.82	27-AUG-14	17.9	27-AUG-14	40	27-AUG-14	27	27-AUG-14	144	27-AUG-14	1.6	27-AUG-14	2.05	Y	2.8848	2.8848	0.71784	0.71784	1	-0.198451	34.9444	34.9444	34.9444	35	2	0	0	0	1	3	24	1	0	0	0	0	0	1	1	0	1
7088127	06-JAN-16	11-JAN-16	6.4	11-JAN-16	231	11-JAN-16	140	11-JAN-16	0.98	11-JAN-16	9999999	26-JAN-16	31	08-JAN-16	21	08-JAN-16	49	08-JAN-16	3.9	28-JUL-15	1.04	Y	16.1181	16.1181	0.0392207	0.0392207	1	-0.0202027	77.3657	40	40	40	1	1	0	0	0	1	5	0	0	0	0	0	0	0	0	0	999
1484955	28-APR-09	07-MAY-09	10.1	05-MAY-09	9999999	05-MAY-09	145	05-MAY-09	5.98	05-MAY-09	9999999	28-APR-09	110	28-APR-09	58	28-APR-09	137	28-APR-09	1.7	28-APR-09	3.25	Y	16.1181	16.1181	1.17865	1.17865	1.78842	1.78842	97.6725	40	40	40	1	1	0	0	0	1	9	0	0	0	0	0	1	0	0	0	999
1858245	19-MAY-09	02-JUN-09	15.7	02-JUN-09	9999999	02-JUN-09	135	23-JUL-09	2.55	23-JUL-09	2.2	23-JUL-09	53	23-JUL-09	18	23-JUL-09	95	23-JUL-09	2.8	23-JUL-09	1.38	Y	0.788457	0.788457	0.322083	0.322083	0.936093	0.936093	21.9761	21.9761	23.1657	23	1	1	1	0	1	1	14	0	0	0	0	0	1	0	0	0	999
0289664	22-OCT-09	26-OCT-09	9.1	26-OCT-09	87	26-OCT-09	135	26-OCT-09	1	26-OCT-09	9999999	23-OCT-09	144	22-OCT-09	48	22-OCT-09	227	22-OCT-09	1.2	22-OCT-09	1.26		16.1181	16.1181	0.231112	0.231112	0	0	69.9449	40	40	40	0	0	0	0	1	1	4	0	0	0	0	0	1	0	0	0	999
0945239	20-SEP-09	16-OCT-09	20	01-MAY-10	9999999	01-MAY-10	141	01-MAY-10	0.82	01-MAY-10	9999999	01-MAY-10	80	30-APR-10	40	30-APR-10	63	30-APR-10	2.7	30-APR-10	1.24	Y	16.1181	16.1181	0.215111	0.215111	1	-0.198451	79.3356	40	40	40	1	0	0	0	1	2	27	0	0	0	0	0	1	1	0	0	999
1927153	14-DEC-11	19-DEC-11	4.4	19-DEC-11	36	19-DEC-11	134	19-DEC-11	0.89	19-DEC-11	3.3	14-DEC-11	28	14-DEC-11	21	14-DEC-11	128	14-DEC-11	3	14-DEC-11	1.21	Y	1.19392	1.19392	0.19062	0.19062	1	-0.116534	22.648	22.648	24.3658	24	2	1	0	0	1	1	5	0	0	0	0	0	0	1	0	0	999
2193859	19-JUL-12	03-AUG-12	6.7	30-JUL-12	238	30-JUL-12	132	03-AUG-12	0.72	03-AUG-12	9999999	19-JUL-12	109	19-JUL-12	34	19-JUL-12	94	19-JUL-12	1.7	19-JUL-12	1.17		16.1181	16.1181	0.157004	0.157004	1	-0.328504	78.6848	40	40	40	0	0	1	0	0	1	15	0	0	0	0	0	1	0	1	0	999
1131969	26-SEP-10	01-OCT-10	3	25-FEB-13	9999999	25-FEB-13	135	25-FEB-13	1.1	25-FEB-13	9999999	25-FEB-13	105	24-FEB-13	69	24-FEB-13	64	24-FEB-13	4.1	24-FEB-13	1.14	Y	16.1181	16.1181	0.131028	0.131028	0.0953102	0.0953102	69.736	40	40	40	1	0	0	0	0	1	5	0	0	0	0	0	0	1	0	0	1
0469601	30-AUG-13	06-SEP-13	9.9	01-SEP-13	186	01-SEP-13	124	01-SEP-13	0.94	01-SEP-13	9999999	30-AUG-13	199	30-AUG-13	51	30-AUG-13	163	30-AUG-13	9999999	30-AUG-13	1.51	Y	16.1181	16.1181	0.41211	0.41211	1	-0.0618754	81.542	40	40	40	1	0	1	0	1	1	7	0	0	0	1	0	1	0	0	1	999
1314471	30-SEP-14	31-OCT-14	19	31-OCT-14	9999999	31-OCT-14	138	31-OCT-14	4.79	31-OCT-14	28.5	31-OCT-14	1416	31-OCT-14	635	31-OCT-14	67	31-OCT-14	1.4	31-OCT-14	4.02	Y	3.3499	3.3499	1.39128	1.39128	1.56653	1.56653	49.6667	40	40	40	1	0	1	0	1	1	30	0	0	0	1	0	1	0	0	0	999
1536186	17-JAN-14	24-JAN-14	12	28-DEC-14	9999999	28-DEC-14	133	28-DEC-14	0.66	28-DEC-14	11.4	28-DEC-14	110	28-DEC-14	45	28-DEC-14	69	28-DEC-14	2.8	28-DEC-14	1.73	Y	2.43361	2.43361	0.548121	0.548121	1	-0.415515	31.338	31.338	32.4814	32	1	1	1	0	1	3	15	0	0	0	0	0	1	1	0	0	1
8075237	21-FEB-14	03-MAR-14	5.3	17-MAR-15	9999999	17-MAR-15	143	17-MAR-15	0.54	17-MAR-15	2.3	17-MAR-15	166	17-MAR-15	47	17-MAR-15	147	17-MAR-15	3.5	17-MAR-15	1.42	Y	0.832909	0.832909	0.350657	0.350657	1	-0.616186	23.0758	23.0758	19.7248	20	1	1	0	0	1	5	32	2	1	0	0	0	0	0	1	0	999
0379021	26-APR-15	15-MAY-15	7.1	13-MAY-15	214	13-MAY-15	137	13-MAY-15	0.74	13-MAY-15	3.5	12-MAY-15	172	12-MAY-15	160	12-MAY-15	62	12-MAY-15	2.2	12-MAY-15	1.12	Y	1.25276	1.25276	0.113329	0.113329	1	-0.301105	22.0047	22.0047	22.0047	22	2	0	0	0	1	1	19	0	0	0	0	0	1	0	0	0	999
1923242	24-SEP-08	02-OCT-08																	3.6	02-OCT-08	1.87	Y	1	#NUM!	0.625938	0.625938	1	#NUM!	26.7905	26.7905	NA	#VALUE!	0	0	0	0	1	1	8	0	0	0	0	0	1	1	1	0	999
0717532	05-OCT-08	10-OCT-08	11.8	22-DEC-08	116	22-DEC-08	131	22-DEC-08	1.34	22-DEC-08	26	22-DEC-08	162	22-DEC-08	127	22-DEC-08	310	22-DEC-08	2.5	22-DEC-08	1.64	Y	3.2581	3.2581	0.494696	0.494696	0.29267	0.29267	27.0871	27.0871	29.6438	30	0	0	0	0	1	4	24	2	1	0	0	0	1	1	1	0	1
1900522	30-NOV-09	02-DEC-09	5.5	02-DEC-09	111	02-DEC-09	139	02-DEC-09	0.59	02-DEC-09	9999999	30-NOV-09	19	30-NOV-09	17	30-NOV-09	107	30-NOV-09	3.4	30-NOV-09	1.13	Y	16.1181	16.1181	0.122218	0.122218	1	-0.527633	78.2952	40	40	40	1	1	0	0	1	1	2	0	0	0	0	0	0	1	0	0	1
2030475	14-APR-10	18-APR-10	42.2	18-APR-10	9999999	18-APR-10	135.7	21-APR-10	2.3	18-APR-10	9.8	18-APR-10	535	18-APR-10	204	18-APR-10	99	18-APR-10	1.6	18-APR-10	2.69		2.28238	2.28238	0.989541	0.989541	0.832909	0.832909	34.1112	34.1112	34.3638	34	0	1	0	0	1	1	4	0	0	0	1	0	1	999	1	0	999
0438289	19-OCT-10	20-OCT-10	15.3	19-OCT-10	153	19-OCT-10	135	19-OCT-10	1.04	19-OCT-10	6.5	19-OCT-10	66	19-OCT-10	51	19-OCT-10	130	19-OCT-10	1.6	19-OCT-10	2.55	Y	1.8718	1.8718	0.936093	0.936093	0.0392207	0.0392207	24.365	24.365	25.3969	25	0	0	0	0	0	1	2	0	0	0	1	0	1	1	0	0	999
0477577	28-MAY-12	03-JUN-12	10.3	11-JUN-12	9999999	11-JUN-12	131	11-JUN-12	1.35	11-JUN-12	9999999	11-JUN-12	136	11-JUN-12	100	11-JUN-12	141	11-JUN-12	2.2	11-JUN-12	1.77	Y	16.1181	16.1181	0.57098	0.57098	0.300105	0.300105	76.6234	40	40	40	1	0	0	1	1	1	6	0	0	0	0	0	1	1	1	0	1
0737069	07-JUN-12	09-JUN-12	6.7	10-DEC-12	219	10-DEC-12	142	10-DEC-12	0.98	10-DEC-12	9999999	10-DEC-12	57	10-DEC-12	46	10-DEC-12	100	10-DEC-12	3.1	10-DEC-12	1.09		16.1181	16.1181	0.0861777	0.0861777	1	-0.0202027	77.8916	40	40	40	1	0	0	0	0	1	2	0	0	0	0	0	1	1	1	0	1
1694393	28-MAY-13	31-MAY-13	8.2	31-MAY-13	9999999	31-MAY-13	135	31-MAY-13	1.58	31-MAY-13	16.8	30-MAY-13	554	30-MAY-13	80	30-MAY-13	445	30-MAY-13	1.9	30-MAY-13	2.34		2.82138	2.82138	0.850151	0.850151	0.457425	0.457425	30.9941	30.9941	31.5885	32	1	0	0	0	1	1	3	0	0	0	1	0	1	0	0	1	999
1326799	20-MAR-12	22-MAR-12	2.7	22-AUG-13	9999999	22-AUG-13	134	22-AUG-13	0.59	22-AUG-13	9999999	19-AUG-13	36	18-AUG-13	17	18-AUG-13	122	18-AUG-13	2.3	18-AUG-13	2.04		16.1181	16.1181	0.71295	0.71295	1	-0.527633	84.9114	40	40	40	0	0	0	0	0	2	6	0	0	0	0	0	1	1	1	0	1
1626012	30-OCT-09	31-OCT-09	12.5	03-MAR-16	217	03-MAR-16	141	03-MAR-16	11.78	03-MAR-16	0.8	03-MAR-16	31	03-MAR-16	52	03-MAR-16	124	03-MAR-16	4	25-AUG-13	1.05	Y	1	-0.223144	0.0487902	0.0487902	2.4664	2.4664	34.3599	34.3599	33.6154	34	1	0	0	0	0	2	5	1	0	0	0	0	0	0	0	0	999
1248218	15-JUN-14	16-JUN-14	8	15-AUG-16	146	15-AUG-16	141	15-AUG-16	15.76	15-AUG-16	1.1	15-NOV-15	25	15-NOV-15	24	15-NOV-15	122	15-NOV-15	2.9	15-NOV-15	1.05		0.0953102	0.0953102	0.0487902	0.0487902	2.75748	2.75748	33.7258	33.7258	32.8976	33	2	1	0	0	1	3	9	0	0	0	0	0	1	0	0	0	999
0855630	30-MAR-15	04-APR-15	2.8	03-DEC-15	53	03-DEC-15	140	03-DEC-15	0.88	03-DEC-15	1.5	03-DEC-15	24	03-DEC-15	20	03-DEC-15	56	03-DEC-15	3.7	03-DEC-15	1.19	Y	0.405465	0.405465	0.173953	0.173953	1	-0.127833	19.4809	19.4809	17.4495	17	1	0	0	0	0	1	5	0	0	0	0	0	0	1	0	0	1
1585337	02-MAY-15	04-MAY-15	13.9	02-MAY-15	73	02-MAY-15	132	03-MAY-15	3.92	03-MAY-15	17.3	03-MAY-15	69	03-MAY-15	35	03-MAY-15	105	03-MAY-15	1.6	03-MAY-15	2.00		2.85071	2.85071	0.693147	0.693147	1.36609	1.36609	38.0424	38.0424	38.3654	38	3	0	0	1	1	1	2	0	0	0	0	0	1	1	1	0	1
0662792	28-JUL-14	30-JUL-14	4.7	06-AUG-15	91	06-AUG-15	140	06-AUG-15	0.77	06-AUG-15	2.4	06-AUG-15	104	06-AUG-15	69	06-AUG-15	117	06-AUG-15	2.9	06-AUG-15	1.22	Y	0.875469	0.875469	0.198851	0.198851	1	-0.261365	21.5364	21.5364	19.7085	20	1	0	0	0	0	1	2	0	0	0	0	0	0	1	1	0	999
7084147	13-JUN-15	23-JUN-15	9.1	17-SEP-15	193	17-SEP-15	140	17-SEP-15	0.63	17-SEP-15	0.9	17-SEP-15	45	17-SEP-15	19	17-SEP-15	119	17-SEP-15	3.1	17-SEP-15	1.06	Y	1	-0.105361	0.0582689	0.0582689	1	-0.462035	20.4326	20.4326	18.4954	18	0	0	0	1	1	2	13	0	0	0	0	0	1	1	0	0	1
1798900	25-OCT-09	05-NOV-09	4	03-NOV-09	9999999	03-NOV-09	143	03-NOV-09	0.91	03-NOV-09	9999999	25-OCT-09	53	24-OCT-09	36	24-OCT-09	75	24-OCT-09	9999999	27-OCT-09	1.85	Y	16.1181	16.1181	0.615186	0.615186	1	-0.0943107	83.8165	40	40	40	0	1	1	0	0	1	11	0	0	0	0	0	0	0	0	0	999
8108312	07-NOV-10	12-NOV-10	6.9	30-NOV-10	9999999	30-NOV-10	136	18-NOV-10	1.37	18-NOV-10	22.9	19-NOV-10	67	19-NOV-10	41	19-NOV-10	50	19-NOV-10	2.3	30-NOV-10	2.88	Y	3.13114	3.13114	1.05779	1.05779	0.314811	0.314811	33.1257	33.1257	33.3525	33	1	1	0	0	0	2	9	1	0	0	1	0	1	1	1	0	1
1294929	07-SEP-12	10-SEP-12	11.4	09-OCT-12	143	09-OCT-12	141	09-OCT-12	1.15	09-OCT-12	1.8	09-OCT-12	64	09-OCT-12	38	09-OCT-12	133	09-OCT-12	2.8	09-OCT-12	1.21	Y	0.587787	0.587787	0.19062	0.19062	0.139762	0.139762	12.1243	12.1243	8.44471	8	1	1	0	1	1	1	3	0	0	0	0	0	1	0	0	0	999
0894812	02-NOV-12	04-NOV-12	4	04-NOV-12	55	04-NOV-12	140	04-NOV-12	1.57	04-NOV-12	1.9	04-NOV-12	70	04-NOV-12	34	04-NOV-12	99	04-NOV-12	2.1	04-NOV-12	1.21	Y	0.641854	0.641854	0.19062	0.19062	0.451076	0.451076	15.3079	15.3079	12.8634	13	3	1	0	0	1	1	2	0	0	0	0	0	1	0	0	0	999
1109035	03-DEC-12	11-DEC-12	6.5	30-JAN-13	9999999	30-JAN-13	135	30-JAN-13	4.57	30-JAN-13	5.4	30-JAN-13	60	30-JAN-13	40	30-JAN-13	139	30-JAN-13	2.2	30-JAN-13	1.85	Y	1.6864	1.6864	0.615186	0.615186	1.51951	1.51951	34.2364	34.2364	34.6168	35	1	1	1	0	0	4	16	1	0	0	0	0	1	0	1	0	999
2000411	20-FEB-10	25-FEB-10	4.5	11-AUG-15	161	11-AUG-15	136	07-DEC-15	0.83	07-DEC-15	1.2	07-DEC-15	24	07-DEC-15	18	07-DEC-15	48	07-DEC-15	3.9	07-DEC-15	1.15	Y	0.182322	0.182322	0.139762	0.139762	1	-0.18633	18.2545	18.2545	18.9721	19	2	0	0	0	1	1	5	0	0	0	0	0	1	1	0	0	1
2283483	23-JAN-14	06-FEB-14	5.1	09-MAR-15	392	09-MAR-15	140	08-MAR-15	0.92	08-MAR-15	9999999	09-MAR-15	23	03-MAR-15	11	03-MAR-15	105	03-MAR-15	9999999	03-MAR-15	0.99	Y	16.1181	16.1181	-0.0100503	-0.0100503	1	-0.0833816	76.8138	40	40	40	1	0	0	0	0	7	35	2	3	0	0	0	0	0	1	0	999
1196792	28-MAR-15	04-APR-15	18.9	04-APR-15	9999999	04-APR-15	129	04-APR-15	0.78	04-APR-15	13.5	04-APR-15	113	04-APR-15	58	04-APR-15	196	04-APR-15	1.8	04-APR-15	2.20	Y	2.60269	2.60269	0.788457	0.788457	1	-0.248461	34.6689	34.6689	36.0763	36	2	0	0	0	0	1	7	0	0	0	0	0	0	1	0	0	1
7096483	06-AUG-15	11-AUG-15	7.3	11-AUG-15	146	11-AUG-15	138	11-AUG-15	0.71	11-AUG-15	9.8	11-AUG-15	232	11-AUG-15	135	11-AUG-15	130	11-AUG-15	4.2	14-AUG-15	1.24		2.28238	2.28238	0.215111	0.215111	1	-0.34249	27.0367	27.0367	26.6089	27	1	0	0	0	1	1	5	0	0	0	0	0	0	0	1	0	999
0268830	23-AUG-15	28-AUG-15	2.5	29-MAR-16	51	29-MAR-16	132	29-MAR-16	1.1	29-MAR-16	9999999	27-MAR-16	29	27-MAR-16	17	27-MAR-16	128	27-MAR-16	1.7	23-AUG-15	1.34	Y	16.1181	16.1181	0.29267	0.29267	0.0953102	0.0953102	71.5464	40	40	40	2	1	0	1	1	7	42	3	1	0	1	0	1	1	1	0	1
1177317	11-MAY-10	17-MAY-10	5.9	25-APR-16	269	25-APR-16	139	25-APR-16	0.94	25-APR-16	9999999	22-APR-16	23	22-APR-16	13	22-APR-16	68	22-APR-16	3.5	16-OCT-15	0.97	Y	16.1181	16.1181	-0.0304592	-0.0304592	1	-0.0618754	76.5853	40	40	40	2	1	0	0	0	18	150	0	0	0	0	0	0	0	0	0	999
2053957	06-JUL-15	08-JUL-15	4.4	15-AUG-16	9999999	15-AUG-16	137	14-AUG-16	1.41	14-AUG-16	9999999	10-AUG-16	45	10-AUG-16	17	10-AUG-16	251	10-AUG-16	2.7	25-NOV-15	1.17	Y	16.1181	16.1181	0.157004	0.157004	0.34359	0.34359	72.403	40	40	40	2	1	1	0	1	18	94	10	7	0	0	1	1	1	1	0	1
1927999	11-MAY-08	14-MAY-08	4.2	09-AUG-08	9999999	09-AUG-08	145	09-AUG-08	4.07	09-AUG-08	14.7	07-AUG-08	243	07-AUG-08	112	07-AUG-08	94	07-AUG-08	2.2	07-AUG-08	1.79	Y	2.68785	2.68785	0.582216	0.582216	1.40364	1.40364	36.5437	36.5437	35.6313	36	0	0	0	0	1	4	50	2	1	1	1	0	0	1	1	0	999
1449033	16-SEP-08	20-SEP-08	5.2	15-DEC-08	9999999	15-DEC-08	135	15-DEC-08	0.82	15-DEC-08	6.3	15-DEC-08	113	15-DEC-08	59	15-DEC-08	117	15-DEC-08	2	15-DEC-08	1.32	Y	1.84055	1.84055	0.277632	0.277632	1	-0.198451	26.0668	26.0668	26.9863	27	1	0	0	0	1	1	4	0	0	0	0	0	1	1	0	0	1
0493927	08-JUN-09	08-JUN-09	4.7	08-JUN-09	194	08-JUN-09	136	08-JUN-09	0.92	08-JUN-09	2.2	08-JUN-09	95	08-JUN-09	71	08-JUN-09	58	08-JUN-09	4.1	12-FEB-10	0.96		0.788457	0.788457	-0.040822	-0.040822	1	-0.0833816	18.5232	18.5232	19.2319	19	1	0	1	1	1	2	3	0	0	0	0	0	0	0	0	0	999
0162405	25-MAY-09	08-JUN-09	8.4	24-JUL-09	9999999	24-JUL-09	136	24-JUL-09	0.62	24-JUL-09	1.1	24-JUL-09	94	24-JUL-09	33	24-JUL-09	153	24-JUL-09	1.9	24-JUL-09	1.63	Y	0.0953102	0.0953102	0.48858	0.48858	1	-0.478036	21.8324	21.8324	22.4319	22	1	0	0	0	1	1	14	0	0	0	0	0	1	1	0	1	1
0990349	27-AUG-10	02-SEP-10	25.7	02-SEP-10	9999999	02-SEP-10	152	02-SEP-10	4.07	02-SEP-10	57.2	02-SEP-10	161	02-SEP-10	97	02-SEP-10	75	02-SEP-10	3.8	02-SEP-10	1.71	Y	4.04655	4.04655	0.536493	0.536493	1.40364	1.40364	41.1676	40	40	40	1	0	0	0	0	1	6	0	0	0	1	0	1	0	0	0	999
2001165	08-SEP-10	15-SEP-10	5	14-SEP-10	41	14-SEP-10	128	15-SEP-10	3.62	15-SEP-10	7.2	10-SEP-10	93	10-SEP-10	58	10-SEP-10	144	10-SEP-10	3.3	10-SEP-10	2.87	Y	1.97408	1.97408	1.05431	1.05431	1.28647	1.28647	38.0119	38.0119	38.6023	39	0	0	1	0	1	1	7	0	0	0	0	0	0	0	0	0	999
2048520	13-OCT-10	22-NOV-10	18.5	17-NOV-10	72	17-NOV-10	138	17-NOV-10	3.59	17-NOV-10	0.8	03-NOV-10	50	03-NOV-10	15	03-NOV-10	197	03-NOV-10	1.3	03-NOV-10	1.37	Y	1	-0.223144	0.314811	0.314811	1.27815	1.27815	25.9678	25.9678	25.5047	26	0	1	0	0	0	1	30	0	0	0	1	0	1	0	0	0	999
1280758	14-MAY-09	16-MAY-09	4.9	01-NOV-13	105	01-NOV-13	131	01-NOV-13	3.86	01-NOV-13	0.7	31-OCT-13	51	31-OCT-13	28	31-OCT-13	209	31-OCT-13	1.5	31-OCT-13	1.12	Y	1	-0.356675	0.113329	0.113329	1.35067	1.35067	24.4052	24.4052	27.4929	27	1	1	0	0	1	6	29	0, tons of super small admissions	0	0	0	0	1	1	1	1	999
2119541	24-MAR-14	28-MAR-14	4.3	28-MAR-14	111	28-MAR-14	143	28-MAR-14	0.66	28-MAR-14	1.1	28-MAR-14	68	28-MAR-14	27	28-MAR-14	91	28-MAR-14	3.5	28-MAR-14	1.47		0.0953102	0.0953102	0.385262	0.385262	1	-0.415515	20.6752	20.6752	16.8489	17	0	0	0	0	1	1	4	0	0	0	0	0	1	0	0	0	999
8410761	18-APR-14	20-APR-14	5.5	12-JUN-14	9999999	12-JUN-14	128	12-JUN-14	1.39	12-JUN-14	9999999	12-JUN-14	48	12-JUN-14	23	12-JUN-14	107	12-JUN-14	1.9	12-JUN-14	1.31	Y	16.1181	16.1181	0.270027	0.270027	0.329304	0.329304	73.5321	40	40	40	1	0	0	0	1	2	5	0	0	0	0	1	1	0	1	1	999
0673309	15-JUL-14	30-JUL-14	11	26-JUL-14	65	26-JUL-14	118	27-JUL-14	0.95	27-JUL-14	11.1	26-JUL-14	77	26-JUL-14	43	26-JUL-14	114	26-JUL-14	2.6	26-JUL-14	1.90	Y	2.40695	2.40695	0.641854	0.641854	1	-0.0512933	32.287	32.287	37.1231	37	1	0	0	0	1	1	15	0	0	0	1	0	1	1	1	0	1
1550543	04-NOV-14	14-NOV-14	5.7	14-NOV-14	9999999	14-NOV-14	138	14-NOV-14	0.88	14-NOV-14	3.5	09-NOV-14	53	09-NOV-14	31	09-NOV-14	117	09-NOV-14	1.4	09-NOV-14	1.86		1.25276	1.25276	0.620576	0.620576	1	-0.127833	27.6859	27.6859	27.2795	27	1	0	0	1	1	1	10	0	0	0	0	0	1	0	1	0	999
0771943	12-NOV-14	26-NOV-14	5.3	26-NOV-14	60	26-NOV-14	142	26-NOV-14	1.48	26-NOV-14	7.2	26-NOV-14	111	26-NOV-14	41	26-NOV-14	199	26-NOV-14	4.1	26-NOV-14	1.50		1.97408	1.97408	0.405465	0.405465	0.392042	0.392042	22.1851	22.1851	19.2456	19	1	1	0	0	0	1	14	0	0	0	1	0	1	1	1	0	999
1255385	08-MAY-10	12-MAY-10	9	27-JAN-15	160	27-JAN-15	146	30-JAN-15	1.31	30-JAN-15	9999999	26-JAN-15	22	26-JAN-15	20	26-JAN-15	59	26-JAN-15	3.2	26-JAN-15	1.16	Y	16.1181	16.1181	0.14842	0.14842	0.270027	0.270027	71.6029	40	40	40	1	0	1	1	0	9	47	3	1	0	0	0	0	0	0	0	999
1352860	03-APR-15	07-APR-15	5.7	17-MAY-16	95	17-MAY-16	134	17-MAY-16	4.23	17-MAY-16	2.1	17-MAY-16	41	17-MAY-16	20	17-MAY-16	425	17-MAY-16	1.5	28-APR-15	1.24	Y	0.741937	0.741937	0.215111	0.215111	1.4422	1.4422	25.4456	25.4456	26.8865	27	2	1	0	0	1	1	4	0	0	0	0	0	1	1	1	0	1
2245335	05-DEC-13	19-DEC-13	4.4	26-MAY-16	112	26-MAY-16	139	16-JUN-16	0.77	16-JUN-16	1.1	26-MAY-16	46	26-MAY-16	44	26-MAY-16	52	26-MAY-16	3.9	27-JUL-15	1.09	Y	0.0953102	0.0953102	0.0861777	0.0861777	1	-0.261365	17.3255	17.3255	15.8289	16	1	1	0	0	0	4	22	0	0	0	0	0	0	0	0	1	999
1850275	08-AUG-15	15-AUG-15	5.5	06-APR-16	97	06-APR-16	137	06-APR-16	1.02	06-APR-16	2.4	06-APR-16	41	06-APR-16	28	06-APR-16	97	06-APR-16	3.5	31-OCT-15	1.09	Y	0.875469	0.875469	0.0861777	0.0861777	0.0198026	0.0198026	10.894	10.894	10.894	11	2	0	0	0	1	1	7	0	0	0	0	0	0	1	1	0	1
1060767	26-APR-15	01-MAY-15	9.1	29-JUL-16	145	29-JUL-16	139	29-JUL-16	8.77	29-JUL-16	0.7	31-DEC-15	36	31-DEC-15	23	29-JUL-16	125	29-JUL-16	3	31-DEC-15	1.16		1	-0.356675	0.14842	0.14842	2.17134	2.17134	32.652	32.652	32.167	32	1	0	1	0	1	4	23	1	0	0	1	0	0	0	1	0	999
1361305	21-NOV-08	25-NOV-08	14.6	10-DEC-08	9999999	10-DEC-08	139	10-DEC-08	0.87	10-DEC-08	3.4	08-DEC-08	80	08-DEC-08	53	08-DEC-08	352	08-DEC-08	9999999	08-DEC-08	1.02		1.22378	1.22378	0.0198026	0.0198026	1	-0.139262	20.8477	20.8477	19.5836	20	0	1	0	0	1	2	8	1	0	0	1	0	0	0	1	0	999
1152110	28-MAY-09	01-JUN-09	3.9	02-JUL-09	85	02-JUL-09	136	02-JUL-09	0.82	02-JUL-09	2.4	26-JUN-09	41	26-JUN-09	23	26-JUN-09	128	26-JUN-09	2.9	26-JUN-09	1.25		0.875469	0.875469	0.223144	0.223144	1	-0.198451	21.8085	21.8085	22.4088	22	1	0	0	0	1	2	11	0	1	0	0	0	1	0	0	0	999
1913075	23-AUG-09	09-SEP-09	6	04-SEP-09	9999999	04-SEP-09	130	04-SEP-09	3.79	04-SEP-09	1.9	04-SEP-09	263	04-SEP-09	72	04-SEP-09	62	04-SEP-09	2.8	04-SEP-09	1.31	Y	0.641854	0.641854	0.270027	0.270027	1.33237	1.33237	24.6313	24.6313	28.1814	28	0	0	0	0	1	1	17	0	0	0	0	0	1	0	0	1	999
0634991	24-NOV-09	30-DEC-09	37.8	28-DEC-09	9999999	28-DEC-09	127	28-DEC-09	2.47	28-DEC-09	1.6	22-DEC-09	40	22-DEC-09	19	22-DEC-09	179	22-DEC-09	1.1	22-DEC-09	1.26	Y	0.470004	0.470004	0.231112	0.231112	0.904218	0.904218	19.4484	19.4484	26.2304	26	1	0	0	0	1	1	30	0	0	0	1	0	1	1	1	0	1
0439775	04-MAY-10	11-MAY-10	3.4	11-MAY-10	58	11-MAY-10	136	11-MAY-10	1.06	11-MAY-10	10.3	11-MAY-10	53	11-MAY-10	26	11-MAY-10	60	11-MAY-10	2.8	11-MAY-10	2.36	Y	2.33214	2.33214	0.858662	0.858662	0.0582689	0.0582689	25.4201	25.4201	25.9013	26	1	0	0	0	1	1	7	0	0	0	0	0	0	1	1	0	1
8079337	27-APR-10	30-APR-10	4	10-SEP-10	50	10-SEP-10	137	03-SEP-10	0.51	03-SEP-10	9999999	03-SEP-10	57	03-SEP-10	25	03-SEP-10	246	03-SEP-10	2	03-SEP-10	1.09	Y	16.1181	16.1181	0.0861777	0.0861777	1	-0.673345	77.8916	40	40	40	2	0	1	1	1	2	8	0	0	0	0	0	0	0	0	1	999
1577936	02-FEB-10	07-FEB-10	5.7	27-AUG-10	9999999	27-AUG-10	131	27-AUG-10	1.83	27-AUG-10	1.7	24-AUG-10	95	24-AUG-10	85	24-AUG-10	183	24-AUG-10	2.5	24-AUG-10	1.56	Y	0.530628	0.530628	0.444686	0.444686	0.604316	0.604316	19.1996	19.1996	23.318	23	1	0	1	1	1	3	54	0	2	0	0	0	0	0	0	0	999
1150399	08-SEP-10	28-SEP-10	29.9	28-SEP-10	195	28-SEP-10	134	28-SEP-10	0.95	28-SEP-10	29.8	28-SEP-10	188	28-SEP-10	92	28-SEP-10	271	28-SEP-10	3.2	28-SEP-10	1.64		3.39451	3.39451	0.494696	0.494696	1	-0.0512933	34.3718	34.3718	34.929	35	1	0	0	1	1	1	20	0	0	0	0	0	0	0	1	0	999
1492121	16-MAY-11	25-MAY-11	11.6	21-MAY-11	232	21-MAY-11	136	21-MAY-11	0.79	21-MAY-11	9999999	21-MAY-11	1175	21-MAY-11	272	21-MAY-11	2070	21-MAY-11	2.1	21-MAY-11	1.14	Y	16.1181	16.1181	0.131028	0.131028	1	-0.235722	78.3939	40	40	40	1	1	0	0	1	1	9	0	0	0	1	0	0	0	0	0	999
2124017	25-MAR-12	31-MAR-12	5.8	22-NOV-12	88	22-NOV-12	138	22-NOV-12	0.87	22-NOV-12	1.7	17-NOV-12	90	17-NOV-12	43	17-NOV-12	131	17-NOV-12	2.9	17-NOV-12	1.18	Y	0.530628	0.530628	0.165514	0.165514	1	-0.139262	19.8595	19.8595	19.1949	19	1	1	0	0	1	2	11	0	0	0	0	0	1	1	1	0	1
2207299	19-OCT-12	20-NOV-12	6.9	20-NOV-12	97	20-NOV-12	128	20-NOV-12	0.7	20-NOV-12	3	19-NOV-12	60	19-NOV-12	25	19-NOV-12	159	19-NOV-12	2.5	19-NOV-12	1.57	Y	1.09861	1.09861	0.451076	0.451076	1	-0.356675	25.2048	25.2048	29.599	30	0	0	0	0	0	1	30	0	0	0	0	0	1	1	1	0	999
2014866	22-NOV-13	29-NOV-13	1.1	05-DEC-13	9999999	05-DEC-13	153	05-DEC-13	1.74	05-DEC-13	12.6	05-DEC-13	59	05-DEC-13	29	05-DEC-13	116	05-DEC-13	2.8	05-DEC-13	1.53	Y	2.5337	2.5337	0.425268	0.425268	0.553885	0.553885	26.0711	26.0711	18.7166	19	1	0	0	0	1	2	12	1	0	0	0	0	1	1	1	0	1
1335217	20-DEC-12	22-DEC-12	5.2	24-APR-16	118	24-APR-16	138	19-JUL-16	0.77	19-JUL-16	2.6	19-JUL-16	53	19-JUL-16	42	19-JUL-16	131	19-JUL-16	2.9	28-SEP-15	1.31	Y	0.955511	0.955511	0.270027	0.270027	1	-0.261365	22.6361	22.6361	22.0631	22	1	1	1	0	0	2	4	0	0	0	0	0	1	1	1	0	999
1734329	23-APR-15	27-APR-15	4.3	18-AUG-16	9999999	18-AUG-16	136	18-AUG-16	0.76	18-AUG-16	2.8	18-AUG-16	54	18-AUG-16	26	18-AUG-16	209	18-AUG-16	2.1	03-JUN-15	1.39	Y	1.02962	1.02962	0.329304	0.329304	1	-0.274437	23.5802	23.5802	24.122	24	2	0	0	0	1	4	20	0	0	0	0	0	1	1	1	1	1
2304138	02-FEB-15	06-MAR-15	5.6	28-AUG-15		31-AUG-15	147	28-AUG-15	3.78	28-AUG-15	9999999	22-AUG-15	42	22-AUG-15	18	22-AUG-15	81	22-AUG-15	5	22-AUG-15	5.58	Y	16.1181	16.1181	1.71919	1.71919	1.32972	1.32972	99.3368	40	40	40	1	0	0	0	0	2	48	0	0	0	1	0	1	1	0	0	1
7091865	02-SEP-15	05-SEP-15	9.8	05-SEP-15	46	05-SEP-15	146	05-SEP-15	1.77	05-SEP-15	51.3	05-SEP-15	86	05-SEP-15	59	05-SEP-15	111	05-SEP-15	4.8	05-SEP-15	1.74	Y	3.93769	3.93769	0.553885	0.553885	0.57098	0.57098	32.9823	32.9823	30.898	31	1	0	0	0	1	1	3	0	0	0	1	0	1	0	0	0	999
2286872	07-OCT-14	09-OCT-14	4	24-SEP-15	70	24-SEP-15	133	24-SEP-15	1.08	24-SEP-15	1.3	24-SEP-15	39	24-SEP-15	21	24-SEP-15	207	24-SEP-15	3.7	24-SEP-15	1.25		0.262364	0.262364	0.223144	0.223144	0.076961	0.076961	10.6575	10.6575	14.5307	15	1	1	0	0	1	1	2	0	0	0	0	0	1	1	1	0	1
1286473	17-MAY-09	21-MAY-09	4.9	16-AUG-16	179	16-AUG-16	135	16-AUG-16	121.45	16-AUG-16	9999999	16-AUG-16	34	16-AUG-16	34	16-AUG-16	276	16-AUG-16	3.6	28-NOV-15	1.02	Y	16.1181	16.1181	0.0198026	0.0198026	4.7995	4.7995	113.509	40	40	40	1	1	0	0	1	12	69	1	2	1	0	0	0	1	0	0	999
1627862	10-FEB-08	19-FEB-08	5.4	09-JUN-16	229	09-JUN-16	141	09-JUN-16	134	09-JUN-16	0.5	09-JUN-16	19	09-JUN-16	15	09-JUN-16	98	09-JUN-16	4.2	09-DEC-15		Y	1	-0.693147	1	#NUM!	4.89784	4.89784	68.2823	40	40	40	1	0	0	0	0	6	17	0	0	0	0	0	0	0	0	0	999
0240573	10-DEC-15	12-DEC-15	3.2	01-MAY-16	86	01-MAY-16	129	01-MAY-16	0.59	01-MAY-16	1.3	01-MAY-16	39	01-MAY-16	38	01-MAY-16	233	01-MAY-16	2.6	10-DEC-15	1.16		0.262364	0.262364	0.14842	0.14842	1	-0.527633	18.654	18.654	24.2894	24	1	1	0	0	1	4	12	1	2	0	0	0	1	1	1	0	999
2058534	16-JAN-13	25-JAN-13	4.4	04-APR-16	9999999	04-APR-16	137	03-AUG-16	0.95	03-AUG-16	1.4	03-AUG-16	32	03-AUG-16	19	03-AUG-16	114	03-AUG-16	4.1	08-OCT-15	1.74	Y	0.336472	0.336472	0.553885	0.553885	1	-0.0512933	23.4754	23.4754	23.4754	23	1	0	1	0	1	3	10	0	0	0	0	0	0	0	1	1	999
1932973	17-DEC-15	22-DEC-15	1.5	25-JUN-16	9999999	25-JUN-16	136	25-JUN-16	0.67	25-JUN-16	9999999	25-JUN-16	34	25-JUN-16	33	25-JUN-16	300	25-JUN-16	1.9	22-DEC-15	1.31	Y	16.1181	16.1181	0.270027	0.270027	1	-0.400478	79.9507	40	40	40	1	1	0	0	1	5	22	1	1	0	1	0	1	0	0	0	999
1934399	02-JUN-08	05-JUN-08	3.6	08-JAN-09	96	08-JAN-09	140	08-JAN-09	0.64	08-JAN-09	9999999	07-JAN-09	34	07-JAN-09	19	07-JAN-09	101	07-JAN-09	2.5	07-JAN-09	1.29	Y	16.1181	16.1181	0.254642	0.254642	1	-0.446287	79.7784	40	40	40	0	0	0	0	1	2	4	0	0	0	0	0	0	0	1	0	999
0842952	02-FEB-09	18-FEB-09	82.4	17-JAN-10	9999999	17-JAN-10	129	20-JAN-10	1.17	21-SEP-09	2.3	21-SEP-09	86	21-SEP-09	114	21-SEP-09	268	21-SEP-09	3.7	21-SEP-09	1.01	Y	0.832909	0.832909	0.00995033	0.00995033	0.157004	0.157004	11.1924	11.1924	18.7976	19	0	0	0	0	0	7	26	1	2	1	1	0	0	1	1	1	1
1329276	22-JUN-11	30-JUN-11	19.2	20-NOV-11	9999999	20-NOV-11	126	20-NOV-11	2.68	20-NOV-11	2.4	20-NOV-11	1033	20-NOV-11	180	20-NOV-11	249	20-NOV-11	1.9	20-NOV-11	1.47	Y	0.875469	0.875469	0.385262	0.385262	0.985817	0.985817	23.4885	23.4885	29.4822	29	2	0	0	0	1	3	19	0	2	0	1	0	0	0	1	0	999
1833972	28-JUN-12	31-JUL-12	1.3	30-JUL-12	9999999	30-JUL-12	140	27-JUL-12	3.19	27-JUL-12	1.1	27-JUL-12	36	27-JUL-12	19	27-JUL-12	31	27-JUL-12	3.3	27-JUL-12	1.98	Y	0.0953102	0.0953102	0.683097	0.683097	1.16002	1.16002	25.5424	25.5424	24.1111	24	1	0	0	0	0	1	30	0	0	0	0	0	1	1	1	0	1
2068967	23-JUL-12	23-JUL-12	12.8	08-AUG-12	9999999	08-AUG-12	131	08-AUG-12	0.66	08-AUG-12	9999999	01-AUG-12	86	01-AUG-12	31	01-AUG-12	153	01-AUG-12	9999999	05-AUG-12	1.70	Y	16.1181	16.1181	0.530628	0.530628	1	-0.415515	82.8694	40	40	40	2	0	0	0	1	2	7	1	0	0	0	0	0	1	1	0	1
0255033	18-JAN-12	30-JAN-12	13	10-MAY-15		10-MAY-15	146	10-MAY-15	1.57	10-MAY-15	9999999	05-MAY-15	77	05-MAY-15	50	05-MAY-15	72	05-MAY-15	3.5	05-MAY-15	1.10	Y	16.1181	16.1181	0.0953102	0.0953102	0.451076	0.451076	72.7407	40	40	40	2	1	1	0	0	5	31	0	1	0	1	0	1	1	0	0	999
2217039	27-SEP-13	07-OCT-13	4.9	07-MAY-15	130	07-MAY-15	132	07-MAY-15	0.67	07-MAY-15	9999999	07-MAY-15	56	07-MAY-15	15	07-MAY-15	79	07-MAY-15	3.5	07-MAY-15	1.21	Y	16.1181	16.1181	0.19062	0.19062	1	-0.400478	79.0613	40	40	40	1	0	0	0	1	4	23	0	1	0	0	0	1	0	1	0	999
1719665	12-MAR-13	19-MAR-13	9.8	30-JUN-15	9999999	30-JUN-15	133	30-JUN-15	2.99	30-JUN-15	1.7	30-JUN-15	105	30-JUN-15	28	30-JUN-15	68	30-JUN-15	1.5	30-JUN-15	1.56	Y	0.530628	0.530628	0.444686	0.444686	1.09527	1.09527	23.898	23.898	26.0235	26	1	0	1	0	1	7	105	3	1	0	1	0	1	1	1	0	1
1926288	14-JUL-15	15-JUL-15	3.8	14-JUL-15	9999999	14-JUL-15	137	15-JUL-15	2.1	15-JUL-15	3.3	15-JUL-15	64	15-JUL-15	24	15-JUL-15	45	15-JUL-15	2	15-JUL-15	1.39	Y	1.19392	1.19392	0.329304	0.329304	0.741937	0.741937	21.7316	21.7316	21.7316	22	2	0	0	0	1	1	1	0	0	0	1	0	1	0	1	0	999
1873540	19-SEP-14	28-SEP-14	10.3	23-FEB-16	164	23-FEB-16	132	23-FEB-16	4.33	23-FEB-16	1	23-FEB-16	18	23-FEB-16	18	23-FEB-16	741	23-FEB-16	3.2	16-JUL-15	1.05	Y	0	0	0.0487902	0.0487902	1.46557	1.46557	21.0019	21.0019	24.1366	24	1	1	0	0	0	3	16	0	1	1	0	0	1	0	0	0	999
0355451	28-DEC-07	03-JAN-08	16.3	22-AUG-08	9999999	22-AUG-08	150	22-AUG-08	1.54	22-AUG-08	9999999	22-AUG-08	115	22-AUG-08	49	22-AUG-08	98	22-AUG-08	2.4	22-AUG-08	3.77		16.1181	16.1181	1.32708	1.32708	0.431782	0.431782	86.3518	40	40	40	1	0	0	0	1	1	6	0	0	0	0	0	1	1	0	0	999
2015559	11-JAN-10	29-JAN-10	7.2	27-JAN-10	105	27-JAN-10	129	27-JAN-10	7.45	27-JAN-10	38.8	27-JAN-10	96	27-JAN-10	50	27-JAN-10	670	27-JAN-10	2.1	27-JAN-10	1.58		3.65842	3.65842	0.457425	0.457425	2.00821	2.00821	44.6006	40	40	40	1	0	0	0	0	1	18	0	0	0	0	0	0	0	0	0	999
0532930	28-OCT-10	17-NOV-10	5.8	04-JAN-11	164	04-JAN-11	130	04-JAN-11	1.3	04-JAN-11	0.5	04-JAN-11	21	04-JAN-11	9999999	04-JAN-11	39	04-JAN-11	2.7	04-JAN-11	1.15	Y	1	-0.693147	0.139762	0.139762	0.262364	0.262364	14.2862	14.2862	20.2261	20	2	1	0	0	1	3	24	2	0	0	0	0	0	0	0	0	999
0527925	21-MAR-11	05-APR-11	7.8	31-MAR-11	117	31-MAR-11	141	01-APR-11	2.21	01-APR-11	9999999	21-MAR-11	36	21-MAR-11	20	21-MAR-11	89	21-MAR-11	2.2	21-MAR-11	1.29	Y	16.1181	16.1181	0.254642	0.254642	0.792993	0.792993	77.7973	40	40	40	2	1	1	0	1	1	15	0	0	0	1	0	1	0	0	0	999
1293981	18-SEP-11	20-SEP-11	4.5	20-SEP-11	86	20-SEP-11	142	27-OCT-11	0.58	27-OCT-11	2.2	27-OCT-11	59	27-OCT-11	29	27-OCT-11	138	27-OCT-11	3.1	27-OCT-11	1.38		0.788457	0.788457	0.322083	0.322083	1	-0.544727	22.5877	22.5877	19.7147	20	2	0	0	0	0	1	2	0	0	0	0	0	1	0	0	0	999
8476754	22-MAY-10	29-MAY-10	2.7	26-JUN-15	9999999	26-JUN-15	139	26-JUN-15	0.51	26-JUN-15	0.5	26-JUN-15	35	26-JUN-15	29	26-JUN-15	151	26-JUN-15	3.2	26-JUN-15	1.17	Y	1	-0.693147	0.157004	0.157004	1	-0.673345	21.5384	21.5384	20.32	20	2	0	0	1	1	2	15	0	0	0	0	0	1	1	0	0	1
2022180	09-JUL-12	13-JUL-12	8.4	01-NOV-12	9999999	01-NOV-12	140	01-NOV-12	1.21	01-NOV-12	10.4	01-NOV-12	82	01-NOV-12	74	01-NOV-12	80	01-NOV-12	3.5	01-NOV-12	2.64	Y	2.34181	2.34181	0.970779	0.970779	0.19062	0.19062	27.979	27.979	26.7889	27	2	0	0	0	0	2	10	0	0	1	0	0	1	1	0	0	1
8215761	11-JAN-13	15-JAN-13	6.1	11-SEP-15	208	11-SEP-15	136	19-APR-16	1.14	19-APR-16	1.8	19-APR-16	28	19-APR-16	28	19-APR-16	57	19-APR-16	4.4	25-SEP-15	1.19		0.587787	0.587787	0.173953	0.173953	0.131028	0.131028	11.8541	11.8541	12.7829	13	1	1	1	0	1	2	4	1	0	0	0	0	0	0	0	0	999
1299720	17-FEB-13	04-MAR-13	19.2	04-MAR-13	9999999	04-MAR-13	137	04-MAR-13	1.57	04-MAR-13	13.4	04-MAR-13	106	04-MAR-13	34	04-MAR-13	73	04-MAR-13	2.8	04-MAR-13	2.27	Y	2.59525	2.59525	0.81978	0.81978	0.451076	0.451076	29.7384	29.7384	29.7384	30	1	0	0	0	1	1	15	0	0	0	1	0	0	0	0	0	999
2233830	22-JUL-13	07-AUG-13	4.5	25-NOV-13	9999999	25-NOV-13	141	25-NOV-13	1.65	25-NOV-13	9999999	22-NOV-13	14	11-NOV-13	9999999	11-NOV-13	95	11-NOV-13	249	13-NOV-13	2.48	Y	16.1181	16.1181	0.908259	0.908259	0.500775	0.500775	82.3213	40	40	40	0	1	1	0	0	2	76	0	0	0	1	0	0	0	0	0	999
1919041	18-FEB-14	21-FEB-14	3.4	21-FEB-14	9999999	21-FEB-14	132	18-FEB-14	0.52	18-FEB-14	6.7	21-FEB-14	315	21-FEB-14	112	21-FEB-14	156	21-FEB-14	1.6	21-FEB-14	2.11	Y	1.90211	1.90211	0.746688	0.746688	1	-0.653926	31.5529	31.5529	32.9466	33	1	0	0	0	1	1	3	0	0	0	0	0	1	1	0	0	1
1060374	14-APR-13	17-APR-13	8.1	27-JAN-15	161	27-JAN-15	132	27-JAN-15	3.2	27-JAN-15	1.3	27-JAN-15	33	27-JAN-15	24	27-JAN-15	190	27-JAN-15	2.9	27-JAN-15	1.18	Y	0.262364	0.262364	0.165514	0.165514	1.16315	1.16315	20.4069	20.4069	23.6397	24	1	1	1	0	0	4	11	0	0	1	1	0	0	0	0	0	999
1539821	23-MAR-15	26-MAR-15	9.3	07-MAR-16	9999999	07-MAR-16	136	07-MAR-16	234.46	07-MAR-16	1.1	07-MAR-16	22	07-MAR-16	12	07-MAR-16	76	07-MAR-16	3.2	05-JUN-15	1.21	Y	0.0953102	0.0953102	0.19062	0.19062	5.45728	5.45728	61.1514	40	40	40	2	1	0	0	1	2	8	0	0	0	0	0	0	0	0	0	999
7066602	04-SEP-15	07-SEP-15	6.8	19-JUL-16	124	19-JUL-16	128	19-JUL-16	0.92	19-JUL-16	2.4	19-JUL-16	79	19-JUL-16	39	19-JUL-16	132	19-JUL-16	1.9	30-DEC-15	1.37	Y	0.875469	0.875469	0.314811	0.314811	1	-0.0833816	22.8352	22.8352	27.9331	28	1	1	0	0	0	8	30	0	4	0	1	0	1	0	1	1	1
1691617	18-AUG-08	20-AUG-08	16.3	19-AUG-08	74	19-AUG-08	130	19-AUG-08	1.67	19-AUG-08	1.5	19-AUG-08	39	19-AUG-08	28	19-AUG-08	321	19-AUG-08	2	19-AUG-08	1.15	Y	0.405465	0.405465	0.139762	0.139762	0.512824	0.512824	14.4357	14.4357	20.3411	20	1	1	0	0	1	1	2	0	0	0	1	0	0	0	1	0	1
1807356	22-FEB-09	25-FEB-09	2.9	18-MAR-09	9999999	18-MAR-09	133	17-MAR-09	85.5	17-MAR-09	9999999	17-MAR-09	85	17-MAR-09	32	17-MAR-09	84	17-MAR-09	1.3	17-MAR-09	> 16.90	Y	16.1181	16.1181	#VALUE!	#VALUE!	4.44852	4.44852	#VALUE!	#VALUE!	#VALUE!	#VALUE!	0	0	0	0	1	2	3	1	0	0	0	0	0	1	1	0	999
0423125	29-AUG-09	01-SEP-09	3.9	14-OCT-09	61	14-OCT-09	135	14-OCT-09	1.01	14-OCT-09	4.9	14-OCT-09	111	14-OCT-09	55	14-OCT-09	158	14-OCT-09	2	14-OCT-09	1.49		1.58924	1.58924	0.398776	0.398776	0.00995033	0.00995033	16.9988	16.9988	18.5169	19	2	1	1	0	1	1	3	0	0	0	0	1	1	1	1	1	1
2054144	07-APR-11	09-APR-11	3.3	09-APR-11	57	09-APR-11	141	09-APR-11	0.9	09-APR-11	2.1	09-APR-11	75	09-APR-11	42	09-APR-11	100	09-APR-11	2	09-APR-11	1.57		0.741937	0.741937	0.451076	0.451076	1	-0.105361	23.8566	23.8566	21.7256	22	1	1	0	0	0	1	2	0	0	0	0	0	1	1	1	0	999
0361574	22-DEC-09	29-DEC-09	4.2	28-APR-11	80	28-APR-11	146	28-APR-11	1.19	28-APR-11	1	28-APR-11	43	28-APR-11	25	28-APR-11	137	28-APR-11	2.6	28-APR-11	1.13	Y	0	0	0.122218	0.122218	0.173953	0.173953	9.46357	9.46357	0.394251	0	1	0	0	0	0	1	7	0	0	0	0	0	1	1	1	0	999
0171755	29-JUN-11	04-JUL-11	6.5	26-JUL-11	145	26-JUL-11	136	02-AUG-11	2.64	02-AUG-11	9999999	26-JUL-11	26	26-JUL-11	10	26-JUL-11	59	26-JUL-11	1.7	26-JUL-11	1.31	Y	16.1181	16.1181	0.270027	0.270027	0.970779	0.970779	79.6711	40	40	40	2	0	1	0	1	2	6	1	0	0	0	1	0	0	1	1	999
8208372	15-NOV-11	29-NOV-11	3.8	29-NOV-11	89	29-NOV-11	127	29-NOV-11	0.88	29-NOV-11	9999999	25-NOV-11	40	15-NOV-11	30	15-NOV-11	223	15-NOV-11	2.1	15-NOV-11	1.31	Y	16.1181	16.1181	0.270027	0.270027	1	-0.127833	79.9507	40	40	40	2	1	1	1	0	1	14	0	0	0	0	0	0	1	0	1	1
1680323	27-APR-11	06-MAY-11	8.4	23-AUG-12	206	23-AUG-12	134	25-SEP-12	1.21	25-SEP-12	0.6	25-SEP-12	12	25-SEP-12	10	25-SEP-12	118	25-SEP-12	3.9	25-SEP-12	1.26	Y	1	-0.510826	0.231112	0.231112	0.19062	0.19062	14.6227	14.6227	17.135	17	1	0	0	0	1	4	22	1	0	0	0	0	1	0	0	0	999
1818602	17-JUN-12	20-JUN-12	7	19-JUN-12	119	19-JUN-12	139	19-JUN-12	1.82	19-JUN-12	0.8	19-JUN-12	40	19-JUN-12	17	19-JUN-12	65	19-JUN-12	1.6	19-JUN-12	1.04	Y	1	-0.223144	0.0392207	0.0392207	0.598837	0.598837	16.3801	16.3801	14.8212	15	1	1	0	0	1	1	3	0	0	0	0	0	1	1	0	0	1
1738122	11-AUG-12	15-AUG-12	7.7	15-AUG-12	9999999	15-AUG-12	133	15-AUG-12	0.76	15-AUG-12	6.6	15-AUG-12	71	15-AUG-12	35	15-AUG-12	126	15-AUG-12	1.8	15-AUG-12	1.69		1.88707	1.88707	0.524729	0.524729	1	-0.274437	29.0101	29.0101	30.4608	30	2	0	0	0	1	1	4	0	0	0	0	0	0	0	1	1	999
1306511	19-NOV-12	30-NOV-12	4.6	30-NOV-12	85	30-NOV-12	135	30-NOV-12	3.33	30-NOV-12	2	27-NOV-12	63	27-NOV-12	18	27-NOV-12	89	27-NOV-12	2.8	27-NOV-12	1.44	Y	0.693147	0.693147	0.364643	0.364643	1.20297	1.20297	24.6465	24.6465	25.6599	26	2	1	1	0	1	1	11	0	0	0	0	0	0	0	0	0	999
2232907	08-MAY-13	10-MAY-13	7.3	10-MAY-13	54	10-MAY-13	139	10-MAY-13	0.65	10-MAY-13	2.4	10-MAY-13	99	10-MAY-13	80	10-MAY-13	109	10-MAY-13	2.5	10-MAY-13	1.27		0.875469	0.875469	0.239017	0.239017	1	-0.430783	21.9863	21.9863	20.7974	21	1	0	0	0	0	1	2	0	0	0	0	0	0	0	0	0	999
8214393	16-NOV-12	16-NOV-12	3.5	24-MAY-13	9999999	24-MAY-13	141	24-MAY-13	0.88	24-MAY-13	2.2	24-MAY-13	135	24-MAY-13	67	24-MAY-13	214	24-MAY-13	2.9	24-MAY-13	1.35	Y	0.788457	0.788457	0.300105	0.300105	1	-0.127833	22.3415	22.3415	20.0106	20	1	0	0	0	1	1	<1, 5 hours	0	0	0	0	0	0	0	0	1	999
1440695	14-MAR-11	15-MAR-11	6.4	21-JUL-13	9999999	21-JUL-13	126	21-JUL-13	1.31	21-JUL-13	18.4	16-JUL-13	351	16-JUL-13	132	16-JUL-13	52	16-JUL-13	2.2	16-JUL-13	1.36	Y	2.91235	2.91235	0.307485	0.307485	0.270027	0.270027	23.4667	23.4667	29.4683	29	1	0	0	0	0	2	61	0	0	0	1	0	1	0	0	0	999
2277061	16-OCT-13	19-OCT-13	4.8	19-OCT-13	80	19-OCT-13	136	19-OCT-13	0.72	19-OCT-13	3.9	19-OCT-13	53	19-OCT-13	30	19-OCT-13	68	19-OCT-13	2.2	19-OCT-13	1.97		1.36098	1.36098	0.678034	0.678034	1	-0.328504	28.7385	28.7385	29.1101	29	1	0	0	0	0	1	3	0	0	0	0	0	0	0	1	0	999
8256546	11-JUN-14	18-JUN-14	10.8	16-JUN-14	172	16-JUN-14	136	16-JUN-14	5.69	16-JUN-14	28.8	16-JUN-14	261	16-JUN-14	73	16-JUN-14	151	16-JUN-14	2	16-JUN-14	1.70	Y	3.36038	3.36038	0.530628	0.530628	1.73871	1.73871	41.7147	40	40	40	1	0	0	1	0	1	7	0	0	0	1	0	1	0	0	0	999
0793178	06-FEB-14	18-FEB-14	8.6	13-NOV-14	238	13-NOV-14	141	13-NOV-14	0.77	13-NOV-14	0.5	13-NOV-14	18	13-NOV-14	14	13-NOV-14	58	13-NOV-14	3.6	13-NOV-14	0.98	Y	1	-0.693147	-0.0202027	-0.0202027	1	-0.261365	19.5537	19.5537	16.8548	17	3	1	0	0	0	1	12	0	0	0	0	0	0	0	0	0	999
1684847	05-FEB-15	14-FEB-15	11.3	12-FEB-15	9999999	12-FEB-15	136	12-FEB-15	1.08	12-FEB-15	3.4	12-FEB-15	26	12-FEB-15	12	12-FEB-15	154	12-FEB-15	3.6	12-FEB-15	1.15	Y	1.22378	1.22378	0.139762	0.139762	0.076961	0.076961	13.3577	13.3577	14.2369	14	2	0	0	0	1	1	9	0	0	0	0	0	0	0	1	0	999
1269402	09-APR-15	11-APR-15	9	10-APR-15	9999999	10-APR-15	151	10-APR-15	0.38	10-APR-15	16	10-APR-15	135	10-APR-15	52	10-APR-15	91	10-APR-15	2.2	10-APR-15	1.76	Y	2.77259	2.77259	0.565314	0.565314	1	-0.967584	32.8119	32.8119	29.491	29	1	0	0	0	0	1	2	0	0	0	1	0	1	1	1	0	1
0546995	22-AUG-15	31-AUG-15	13.3	30-AUG-15	9999999	30-AUG-15	136	30-AUG-15	1.48	30-AUG-15	14.5	30-AUG-15	120	30-AUG-15	54	30-AUG-15	153	30-AUG-15	4.4	30-AUG-15	1.51	Y	2.67415	2.67415	0.41211	0.41211	0.392042	0.392042	24.9058	24.9058	25.4039	25	1	0	1	1	1	1	9	0	0	0	1	0	1	0	1	0	999
0568415	28-SEP-15	30-SEP-15	6.8	01-JUL-16	75	01-JUL-16	134	01-JUL-16	1.14	01-JUL-16	1.8	01-JUL-16	53	01-JUL-16	23	01-JUL-16	110	01-JUL-16	3.6	29-DEC-15	1.17	Y	0.587787	0.587787	0.157004	0.157004	0.131028	0.131028	11.6642	11.6642	14.4695	14	1	0	0	0	1	6	21	2	1	0	0	0	1	1	1	0	1
0223274	28-NOV-08	02-DEC-08	7.3	01-DEC-08	98	01-DEC-08	136	02-DEC-08	1.3	02-DEC-08	9999999	28-NOV-08	50	28-NOV-08	21	28-NOV-08	132	28-NOV-08	2.4	28-NOV-08	1.34		16.1181	16.1181	0.29267	0.29267	0.262364	0.262364	73.1451	40	40	40	0	0	1	0	1	1	4	0	0	0	0	0	1	1	0	1	1
0262495	17-DEC-08	18-DEC-08	3.2	23-DEC-08	9999999	23-DEC-08	132	23-DEC-08	0.72	23-DEC-08	9999999	22-DEC-08	77	22-DEC-08	36	22-DEC-08	131	22-DEC-08	1.5	22-DEC-08	2.10	Y	16.1181	16.1181	0.741937	0.741937	1	-0.328504	85.2361	40	40	40	1	0	0	0	1	2	3	1	0	0	0	0	1	0	1	0	999
0638130	02-NOV-11	03-NOV-11	5.6	12-DEC-11	9999999	12-DEC-11	131	12-DEC-11	0.98	12-DEC-11	7.9	12-DEC-11	64	12-DEC-11	89	12-DEC-11	309	12-DEC-11	2	20-NOV-11	1.38	Y	2.06686	2.06686	0.322083	0.322083	1	-0.0202027	27.4201	27.4201	29.9109	30	2	1	0	0	1	2	3	1	0	1	0	0	1	1	1	1	0
0880448	24-JUL-12	01-AUG-12	7.4	12-AUG-12	9999999	12-AUG-12	128	12-AUG-12	1.45	12-AUG-12	38.4	12-AUG-12	147	12-AUG-12	64	12-AUG-12	98	12-AUG-12	2	12-AUG-12	1.90	Y	3.64806	3.64806	0.641854	0.641854	0.371564	0.371564	30.9643	30.9643	33.6479	34	1	0	0	1	1	2	15	1	0	0	0	0	1	0	0	0	999
1568036	15-FEB-13	10-APR-13	11.1	10-APR-13	74	10-APR-13	136	10-APR-13	4.07	10-APR-13	2.2	10-APR-13	45	10-APR-13	15	10-APR-13	53	10-APR-13	2.7	10-APR-13	2.56	Y	0.788457	0.788457	0.940007	0.940007	1.40364	1.40364	33.3713	33.3713	33.5901	34	1	0	1	0	0	1	30	0	0	0	1	0	1	0	1	0	999
1210402	07-APR-13	17-APR-13	7.7	16-APR-13	76	16-APR-13	143	16-APR-13	1.44	16-APR-13	1.9	15-APR-13	103	15-APR-13	23	15-APR-13	117	15-APR-13	2.3	15-APR-13	1.26	Y	0.641854	0.641854	0.231112	0.231112	0.364643	0.364643	14.9343	14.9343	9.97128	10	1	1	0	0	0	1	10	0	0	0	1	0	1	0	0	0	999
0893238	04-JUL-13	10-JUL-13	14.3	07-JUL-13	142	07-JUL-13	138	07-JUL-13	1.06	07-JUL-13	9999999	05-JUL-13	119	04-JUL-13	33	04-JUL-13	269	04-JUL-13	2.4	04-JUL-13	1.46	Y	16.1181	16.1181	0.378436	0.378436	0.0582689	0.0582689	72.1525	40	40	40	1	0	0	0	1	1	6	0	0	0	1	0	1	0	1	1	999
2286774	21-DEC-13	24-DEC-13	3.8	24-DEC-13	77	24-DEC-13	144	24-DEC-13	1.36	24-DEC-13	21.5	24-DEC-13	225	24-DEC-13	110	24-DEC-13	149	24-DEC-13	3	24-DEC-13	1.32		3.06805	3.06805	0.277632	0.277632	0.307485	0.307485	24.0793	24.0793	20.4017	20	1	0	1	0	0	1	3	0	0	0	0	0	1	0	1	1	999
2285618	27-MAR-14	29-MAR-14	6.9	15-MAY-14	143	15-MAY-14	135	15-MAY-14	1.83	15-MAY-14	6.1	15-MAY-14	61	15-MAY-14	21	15-MAY-14	143	15-MAY-14	1.9	15-MAY-14	1.74		1.80829	1.80829	0.553885	0.553885	0.604316	0.604316	25.2521	25.2521	26.2255	26	0	1	0	0	1	1	2	0	0	0	0	0	1	0	0	0	999
2070139	13-AUG-14	12-SEP-14	5.4	07-FEB-15	9999999	07-FEB-15	133	07-FEB-15	0.98	07-FEB-15	6.4	06-FEB-15	48	06-FEB-15	29	06-FEB-15	221	06-FEB-15	2.1	06-FEB-15	1.93	Y	1.8563	1.8563	0.65752	0.65752	1	-0.0202027	30.381	30.381	31.6507	32	1	0	0	0	1	2	48	0	0	0	0	0	1	1	1	1	999
1363591	27-JUN-13	03-JUL-13	4.3	07-JUL-16	147	07-JUL-16	136	07-JUL-16	1.04	07-JUL-16	0.5	07-JUL-16	27	07-JUL-16	17	07-JUL-16	102	07-JUL-16	4.1	03-DEC-15	1.09	Y	1	-0.693147	0.0861777	0.0861777	0.0392207	0.0392207	11.5505	11.5505	12.4894	12	2	0	0	0	1	1	6	0	0	0	0	0	0	0	1	0	999
0377112	28-AUG-15	05-SEP-15	10.7	21-SEP-15	214	21-SEP-15	129	21-SEP-15	0.8	21-SEP-15	0.7	21-SEP-15	20	21-SEP-15	20	21-SEP-15	177	21-SEP-15	2.5	21-SEP-15	1.11	Y	1	-0.356675	0.10436	0.10436	1	-0.223144	20.9488	20.9488	25.9783	26	2	1	0	1	1	2	21	1	0	0	0	0	1	0	0	0	999
1798590	21-AUG-14	26-AUG-14	9.6	30-OCT-15	175	30-OCT-15	134	30-OCT-15	5.08	30-OCT-15	0.4	17-SEP-15	13	17-SEP-15	10	17-SEP-15	89	17-SEP-15	2.1	17-SEP-15	1.11	Y	1	-0.916291	0.10436	0.10436	1.62531	1.62531	26.9331	26.9331	28.2267	28	1	0	0	0	1	7	16	5	1	0	0	0	0	0	1	0	999
0616205	10-MAY-08	20-MAY-08	7.2	13-MAY-08	234	13-MAY-08	136	13-MAY-08	0.5	13-MAY-08	0.8	11-MAY-08	14	11-MAY-08	8	11-MAY-08	40	11-MAY-08	2.9	11-MAY-08	1.02		1	-0.223144	0.0198026	0.0198026	1	-0.693147	20.0018	20.0018	20.6617	21	1	0	0	0	1	1	10	0	0	0	0	0	1	0	0	0	999
1968992	29-JAN-09	02-FEB-09	9.5	31-JAN-09	170	31-JAN-09	133	30-JAN-09	0.76	30-JAN-09	9999999	28-JAN-09	28	28-JAN-09	16	28-JAN-09	93	28-JAN-09	3.4	28-JAN-09	1.07		16.1181	16.1181	0.0676586	0.0676586	1	-0.274437	77.6842	40	40	40	0	0	0	1	1	1	4	0	0	0	0	0	0	0	1	0	999
0954774	23-JAN-09	26-JAN-09	5.4	27-APR-09	66	27-APR-09	135	27-APR-09	1.3	27-APR-09	2.2	27-APR-09	69	27-APR-09	41	27-APR-09	219	27-APR-09	2.3	27-APR-09	1.33	Y	0.788457	0.788457	0.285179	0.285179	0.262364	0.262364	15.1152	15.1152	16.7576	17	1	1	1	0	1	3	4	2	0	0	0	0	1	1	1	0	1
1804663	27-DEC-09	31-DEC-09	5.9	01-SEP-10	81	01-SEP-10	138	01-SEP-10	1.01	01-SEP-10	1.9	01-SEP-10	51	01-SEP-10	37	01-SEP-10	89	01-SEP-10	3.5	01-SEP-10	1.09	Y	0.641854	0.641854	0.0861777	0.0861777	0.00995033	0.00995033	9.91662	9.91662	8.92387	9	2	0	0	0	1	2	4	0	0	0	0	0	1	1	1	0	1
1347224	22-MAR-11	04-APR-11	7.1	04-APR-11	121	04-APR-11	131	04-APR-11	0.56	04-APR-11	2.1	27-MAR-11	43	27-MAR-11	21	27-MAR-11	90	27-MAR-11	2.1	27-MAR-11	1.24	Y	0.741937	0.741937	0.215111	0.215111	1	-0.579818	21.2138	21.2138	24.9334	25	1	0	0	0	1	1	13	0	0	0	0	0	0	0	0	0	999
0761824	02-JUN-11	08-JUN-11	2.2	07-JUN-11	9999999	07-JUN-11	136	07-JUN-11	1.46	07-JUN-11	9999999	02-JUN-11	29	02-JUN-11	18	02-JUN-11	90	02-JUN-11	1.4	02-JUN-11	1.33	Y	16.1181	16.1181	0.285179	0.285179	0.378436	0.378436	74.172	40	40	40	2	0	0	0	1	1	6	0	0	0	1	0	1	0	0	0	999
1684566	10-FEB-12	29-MAR-12	7.5	28-MAR-12	50	28-MAR-12	139	28-MAR-12	2.44	28-MAR-12	49.2	28-MAR-12	178	28-MAR-12	88	28-MAR-12	79	28-MAR-12	3.9	28-MAR-12	2.06	Y	3.89589	3.89589	0.722706	0.722706	0.891998	0.891998	37.7872	37.7872	37.6412	38	1	0	0	1	1	1	30	0	0	0	1	0	0	0	1	0	999
8063267	12-FEB-15	15-FEB-15	9	19-FEB-15	337	19-FEB-15	138	28-SEP-15	2.38	28-SEP-15	0.3	28-SEP-15	7	28-SEP-15	7	28-SEP-15	57	28-SEP-15	2.6	28-SEP-15	1.01	Y	1	-1.20397	0.00995033	0.00995033	0.8671	0.8671	18.6196	18.6196	17.914	18	1	1	1	0	1	1	3	0	0	0	0	0	0	0	0	0	999
7031524	31-OCT-14	04-NOV-14	6.4	04-NOV-14	79	04-NOV-14	136	04-NOV-14	0.64	04-NOV-14	2	04-NOV-14	44	04-NOV-14	27	04-NOV-14	59	04-NOV-14	2.4	04-NOV-14	1.21	Y	0.693147	0.693147	0.19062	0.19062	1	-0.446287	20.755	20.755	21.3901	21	1	0	0	0	1	1	4	0	0	0	0	0	0	1	1	0	1
1498390	07-JUL-14	10-JUL-14	7	09-NOV-14	92	09-NOV-14	126	09-NOV-14	0.68	09-NOV-14	2.7	09-NOV-14	66	09-NOV-14	27	09-NOV-14	94	09-NOV-14	1.5	09-NOV-14	1.93	Y	0.993252	0.993252	0.65752	0.65752	1	-0.385662	27.1187	27.1187	31.7946	32	1	0	0	1	1	2	8	0	0	0	0	0	0	1	0	0	999
7098328	10-AUG-15	13-AUG-15	6.4	12-AUG-15	9999999	12-AUG-15	136	12-AUG-15	0.58	12-AUG-15	13.3	12-AUG-15	374	12-AUG-15	449	12-AUG-15	213	12-AUG-15	2.4	12-AUG-15	1.12		2.58776	2.58776	0.113329	0.113329	1	-0.544727	27.051	27.051	27.4783	27	2	1	0	0	0	1	3	0	0	0	0	0	1	0	0	0	999
1430281	23-MAY-08	29-MAY-08	6.9	29-MAY-08	94	29-MAY-08	133	29-MAY-08	2.2	29-MAY-08	6	29-MAY-08	64	29-MAY-08	27	29-MAY-08	86	29-MAY-08	3.9	29-MAY-08	1.87	Y	1.79176	1.79176	0.625938	0.625938	0.788457	0.788457	27.7589	27.7589	29.3747	29	1	0	0	1	1	1	6	0	0	0	1	0	1	0	1	0	999
1950647	16-SEP-08	21-SEP-08	10.6	17-SEP-08	312	17-SEP-08	137	21-SEP-08	1.28	21-SEP-08	9999999	16-SEP-08	107	16-SEP-08	31	16-SEP-08	517	16-SEP-08	3.5	21-SEP-08	1.11		16.1181	16.1181	0.10436	0.10436	0.24686	0.24686	70.8877	40	40	40	0	1	0	0	1	1	5	0	0	0	0	0	1	0	1	0	999
1653960	28-AUG-09	15-SEP-09	9.2	15-SEP-09	153	15-SEP-09	132	15-SEP-09	3.97	15-SEP-09	9999999	12-SEP-09	265	11-SEP-09	99	11-SEP-09	1627	11-SEP-09	9999999	11-SEP-09	1.07	Y	16.1181	16.1181	0.0676586	0.0676586	1.37877	1.37877	81.309	40	40	40	0	0	0	0	1	1	18	0	0	0	0	0	0	1	1	0	999
1617531	16-SEP-10	26-SEP-10	5.7	22-SEP-10	43	22-SEP-10	140	22-SEP-10	0.92	22-SEP-10	9999999	20-SEP-10	36	20-SEP-10	20	20-SEP-10	109	20-SEP-10	1.4	20-SEP-10	1.46	Y	16.1181	16.1181	0.378436	0.378436	1	-0.0833816	81.1649	40	40	40	2	1	0	0	1	1	10	0	0	0	0	0	0	0	0	0	999
0898484	07-MAY-09	15-MAY-09	6.3	27-MAY-11	55	27-MAY-11	136	25-MAY-11	0.85	25-MAY-11	1.7	27-MAY-11	34	27-MAY-11	23	27-MAY-11	130	27-MAY-11	3.1	27-MAY-11	1.10		0.530628	0.530628	0.0953102	0.0953102	1	-0.162519	19.0732	19.0732	19.7638	20	0	0	0	0	1	3	22	1	0	0	0	0	1	0	0	0	999
1584450	30-JAN-11	03-FEB-11	3.6	18-JUL-11	77	18-JUL-11	134	18-JUL-11	1.43	18-JUL-11	2.4	11-JUL-11	32	11-JUL-11	18	11-JUL-11	85	11-JUL-11	2.6	11-JUL-11	1.33	Y	0.875469	0.875469	0.285179	0.285179	0.357674	0.357674	16.3562	16.3562	18.697	19	2	0	0	0	0	3	23	0	1	0	0	0	1	0	0	1	999
2079978	22-NOV-11	01-DEC-11	7.2	30-NOV-11	9999999	30-NOV-11	132	30-NOV-11	0.58	30-NOV-11	1.7	27-NOV-11	31	27-NOV-11	18	27-NOV-11	91	27-NOV-11	3.4	27-NOV-11	1.70		0.530628	0.530628	0.530628	0.530628	1	-0.544727	23.9488	23.9488	26.5973	27	1	0	0	0	1	1	9	0	0	0	0	0	1	0	1	0	999
2001493	04-SEP-09	14-SEP-09	3.3	06-MAR-12	86	06-MAR-12	137	06-MAR-12	1.47	06-MAR-12	3	03-MAR-12	44	03-MAR-12	18	03-MAR-12	93	03-MAR-12	3.5	12-MAR-12	1.16	Y	1.09861	1.09861	0.14842	0.14842	0.385262	0.385262	15.932	15.932	15.932	16	0	0	0	0	0	2	23	0	0	0	0	0	0	0	0	0	999
1757322	12-APR-10	14-APR-10	6.6	25-MAR-12	9999999	25-MAR-12	139	25-MAR-12	0.65	25-MAR-12	9999999	25-MAR-12	202	25-MAR-12	178	25-MAR-12	88	25-MAR-12	3.9	25-MAR-12	1.13	Y	16.1181	16.1181	0.122218	0.122218	1	-0.430783	78.2952	40	40	40	2	0	0	0	1	1	2	0	0	0	0	0	0	1	0	0	1
0115165	04-OCT-09	05-OCT-09	1.1	12-MAR-13	9999999	12-MAR-13	139	12-MAR-13	1.29	12-MAR-13	9999999	09-MAR-13	44	09-MAR-13	37	09-MAR-13	101	09-MAR-13	1.8	09-MAR-13	1.78	Y	16.1181	16.1181	0.576613	0.576613	0.254642	0.254642	76.2514	40	40	40	2	0	1	0	1	3	21	0	0	0	1	0	0	1	0	0	1
8070871	06-APR-11	10-APR-11	7.9	12-SEP-13	9999999	12-SEP-13	142	12-SEP-13	1.45	12-SEP-13	2.6	11-SEP-13	70	11-SEP-13	21	11-SEP-13	220	11-SEP-13	1.7	11-SEP-13	1.42	Y	0.955511	0.955511	0.350657	0.350657	0.371564	0.371564	17.5251	17.5251	13.8167	14	1	0	1	0	1	32	126	25	5	1	0	0	0	0	0	0	999
0617068	14-JUL-13	17-JUL-13	2.4	11-SEP-14	76	11-SEP-14	142	11-SEP-14	0.9	11-SEP-14	9999999	09-SEP-14	55	09-SEP-14	41	09-SEP-14	114	09-SEP-14	4.1	09-SEP-14	1.22		16.1181	16.1181	0.198851	0.198851	1	-0.105361	79.1535	40	40	40	2	1	0	0	0	2	8	0	0	0	0	0	1	0	0	0	999
2094592	17-SEP-14	04-OCT-14	10.9	04-OCT-14	9999999	04-OCT-14	153	04-OCT-14	0.79	04-OCT-14	23.4	04-OCT-14	107	04-OCT-14	62	04-OCT-14	146	04-OCT-14	4	04-OCT-14	1.68		3.15274	3.15274	0.518794	0.518794	1	-0.235722	33.7278	33.7278	30.4161	30	1	0	1	0	0	1	17	0	0	1	0	0	1	0	1	0	999
7032504	05-NOV-14	11-NOV-14	3.1	11-NOV-14	69	11-NOV-14	139	11-NOV-14	0.69	11-NOV-14	1.1	09-NOV-14	42	09-NOV-14	39	09-NOV-14	100	09-NOV-14	2.6	09-NOV-14	1.06		0.0953102	0.0953102	0.0582689	0.0582689	1	-0.371064	17.0129	17.0129	15.4957	15	1	1	0	0	0	1	6	0	0	0	0	0	0	1	0	0	999
2085202	29-NOV-14	01-DEC-14	5.6	01-DEC-14	86	01-DEC-14	140	01-DEC-14	1.02	01-DEC-14	9999999	29-NOV-14	44	29-NOV-14	27	29-NOV-14	112	29-NOV-14	3.1	29-NOV-14	1.25	Y	16.1181	16.1181	0.223144	0.223144	0.0198026	0.0198026	70.0451	40	40	40	1	0	0	0	1	1	2	0	0	0	0	0	0	0	0	0	999
0505247	16-JAN-15	20-JAN-15	11.7	19-JAN-15	9999999	19-JAN-15	137	19-JAN-15	1.76	19-JAN-15	9999999	19-JAN-15	178	19-JAN-15	96	19-JAN-15	132	19-JAN-15	1.9	19-JAN-15	1.72		16.1181	16.1181	0.542324	0.542324	0.565314	0.565314	78.8405	40	40	40	1	0	0	0	0	1	4	0	0	0	1	0	1	1	0	0	999
2040429	28-AUG-12	31-AUG-12	6.2	06-MAY-15	120	06-MAY-15	136	08-JUL-15	1.49	08-JUL-15	1.9	08-JUL-15	27	08-JUL-15	9	08-JUL-15	98	08-JUL-15	4.1	08-JUL-15	1.08	Y	0.641854	0.641854	0.076961	0.076961	0.398776	0.398776	13.5345	13.5345	14.4078	14	1	0	1	0	1	4	15	0	1	0	0	0	0	0	0	0	999
0379783	23-AUG-15	07-SEP-15	5.7	06-SEP-15	9999999	06-SEP-15	153	07-SEP-15	2.85	07-SEP-15	1.3	07-SEP-15	862	07-SEP-15	402	07-SEP-15	67	07-SEP-15	4	07-SEP-15	3.14	Y	0.262364	0.262364	1.14422	1.14422	1.04732	1.04732	30.2599	30.2599	25.1171	25	1	1	1	1	0	1	15	0	0	0	1	0	1	0	0	0	999
1151716	16-SEP-12	17-SEP-12	5.2	28-MAR-16	9999999	28-MAR-16	130	28-MAR-16	1.13	28-MAR-16	9999999	23-MAR-16	50	23-MAR-16	28	23-MAR-16	257	23-MAR-16	2.3	19-SEP-15	1.09	Y	16.1181	16.1181	0.0861777	0.0861777	0.122218	0.122218	69.4912	40	40	40	1	1	1	0	1	7	25	1	0	0	0	0	0	1	1	0	999
1109879	02-JUL-15	09-JUL-15	6.4	19-OCT-15	216	19-OCT-15	136	19-OCT-15	0.69	19-OCT-15	9999999	20-OCT-15	67	19-OCT-15	23	19-OCT-15	156	19-OCT-15	3.2	19-OCT-15	1.09	Y	16.1181	16.1181	0.0861777	0.0861777	1	-0.371064	77.8916	40	40	40	1	0	1	1	1	2	19	1	0	0	0	0	0	0	0	0	999
1757295	02-JUN-08	19-JUN-08	3.6	03-JUN-08	125	03-JUN-08	138	19-JUN-08	1.2	19-JUN-08	9999999	09-JUN-08	26	02-JUN-08	28	02-JUN-08	106	02-JUN-08	3	02-JUN-08	1.26		16.1181	16.1181	0.231112	0.231112	0.182322	0.182322	71.6897	40	40	40	2	0	0	0	0	1	17	0	0	0	0	0	1	1	1	0	999
0991549	05-SEP-08	15-OCT-08	6.5	11-OCT-08	52	11-OCT-08	136	11-OCT-08	1.02	11-OCT-08	18.2	11-OCT-08	42	11-OCT-08	26	11-OCT-08	25	11-OCT-08	3.8	11-OCT-08	3.21	Y	2.90142	2.90142	1.16627	1.16627	0.0198026	0.0198026	30.6491	30.6491	30.9577	31	1	0	0	1	1	1	30	0	0	0	0	0	1	0	1	0	999
0948332	14-FEB-09	25-FEB-09	13.3	25-FEB-09	162	25-FEB-09	132	25-FEB-09	1.62	25-FEB-09	21.8	25-FEB-09	138	25-FEB-09	58	25-FEB-09	142	25-FEB-09	1.7	25-FEB-09	1.62	Y	3.08191	3.08191	0.482426	0.482426	0.482426	0.482426	28.0996	28.0996	30.0632	30	0	0	0	0	1	1	11	0	0	0	0	0	0	1	1	0	1
2004769	20-NOV-09	25-NOV-09	5.4	25-NOV-09	232	25-NOV-09	141	25-NOV-09	0.74	25-NOV-09	1.7	25-NOV-09	215	25-NOV-09	43	25-NOV-09	354	25-NOV-09	2.1	25-NOV-09	1.15		0.530628	0.530628	0.139762	0.139762	1	-0.301105	19.5711	19.5711	16.8745	17	0	0	0	0	0	1	5	0	0	0	0	0	0	1	1	0	1
0844596	07-MAY-10	09-MAY-10	8.4	09-MAY-10	259	09-MAY-10	132	09-MAY-10	0.67	09-MAY-10	9999999	08-MAY-10	133	07-MAY-10	37	07-MAY-10	278	07-MAY-10	2.6	07-MAY-10	1.41	Y	16.1181	16.1181	0.34359	0.34359	1	-0.400478	80.7746	40	40	40	1	0	0	1	1	1	2	0	0	0	0	0	0	0	1	0	999
1955870	02-APR-09	08-APR-09	20	10-MAY-10	9999999	10-MAY-10	139	10-MAY-10	2.24	10-MAY-10	9999999	07-MAY-10	32	07-MAY-10	29	07-MAY-10	118	07-MAY-10	3.3	07-MAY-10	1.91	Y	16.1181	16.1181	0.647103	0.647103	0.806476	0.806476	82.3219	40	40	40	1	1	1	0	0	5	51	0	2	0	0	0	1	0	1	0	999
1349733	24-FEB-12	06-MAR-12	11.4	05-MAR-12	9999999	05-MAR-12	142	05-MAR-12	3.4	05-MAR-12	9.5	05-MAR-12	169	05-MAR-12	29	05-MAR-12	256	05-MAR-12	3.7	05-MAR-12	1.38	Y	2.25129	2.25129	0.322083	0.322083	1.22378	1.22378	30.2587	30.2587	28.6514	29	1	0	0	0	0	1	11	0	0	1	1	0	1	0	0	0	999
0869633	03-APR-12	08-APR-12	17.7	08-APR-12	9999999	08-APR-12	135	08-APR-12	4.57	08-APR-12	9999999	08-APR-12	33	08-APR-12	18	08-APR-12	68	08-APR-12	4	08-APR-12	1.69	Y	16.1181	16.1181	0.524729	0.524729	1.51951	1.51951	87.7751	40	40	40	2	1	1	0	0	1	5	0	0	0	1	0	1	1	1	0	999
2102072	14-SEP-12	23-SEP-12	5.8	23-SEP-12	76	23-SEP-12	135	23-SEP-12	3.18	23-SEP-12	3.7	23-SEP-12	26	23-SEP-12	8	23-SEP-12	33	23-SEP-12	3.5	23-SEP-12	2.08	Y	1.30833	1.30833	0.732368	0.732368	1.15688	1.15688	30.6494	30.6494	31.2665	31	1	0	1	0	0	1	9	0	0	0	0	0	1	0	1	0	999
8079889	14-FEB-13	16-FEB-13	3.4	16-FEB-13	39	16-FEB-13	133	16-FEB-13	0.91	16-FEB-13	2.3	16-FEB-13	43	16-FEB-13	25	16-FEB-13	95	16-FEB-13	2.4	16-FEB-13	1.44		0.832909	0.832909	0.364643	0.364643	1	-0.0943107	23.2324	23.2324	25.4457	25	1	1	1	0	1	1	2	0	0	0	0	0	0	0	0	0	999
0225695	24-DEC-15	24-JAN-16	4.6	11-DEC-15	57	11-DEC-15	134	11-DEC-15	0.96	11-DEC-15	2.8	11-DEC-15	67	11-DEC-15	38	11-DEC-15	175	11-DEC-15	2.4	11-DEC-15	1.33	Y	1.02962	1.02962	0.285179	0.285179	1	-0.040822	23.086	23.086	24.7605	25	2	1	0	0	0	1	1	0	0	0	1	0	1	1	0	0	999
1929372	03-FEB-14	04-FEB-14	8.6	11-SEP-14	71	11-SEP-14	125	15-SEP-14	4.81	15-SEP-14	2.3	11-SEP-14	45	11-SEP-14	18	11-SEP-14	267	11-SEP-14	3.1	11-SEP-14	1.39	Y	0.832909	0.832909	0.329304	0.329304	1.5707	1.5707	28.2982	28.2982	32.9321	33	1	0	0	0	1	3	11	1	0	0	0	0	1	1	1	0	999
1608262	03-APR-15	10-APR-15	10	02-MAY-15	9999999	02-MAY-15	144	02-MAY-15	0.48	02-MAY-15	4.7	02-MAY-15	436	02-MAY-15	594	02-MAY-15	378	02-MAY-15	1.4	02-MAY-15	1.44		1.54756	1.54756	0.364643	0.364643	1	-0.733969	25.9338	25.9338	22.6845	23	1	0	0	0	1	2	22	1	0	0	0	0	0	0	1	0	999
7096922	04-AUG-15	05-AUG-15	5.5	05-AUG-15	85	05-AUG-15	140	05-AUG-15	2.21	05-AUG-15	9999999	05-AUG-15	69	05-AUG-15	33	05-AUG-15	212	05-AUG-15	2.2	05-AUG-15	1.28		16.1181	16.1181	0.24686	0.24686	0.792993	0.792993	77.7102	40	40	40	1	0	0	0	0	1	1	0	0	0	0	0	1	0	1	0	999
0891887	13-MAR-12	18-MAR-12	5.4	08-AUG-15	119	08-AUG-15	137	08-AUG-15	1.34	08-AUG-15	1.4	08-AUG-15	99	08-AUG-15	29	08-AUG-15	184	08-AUG-15	2.3	08-AUG-15	1.17	Y	0.336472	0.336472	0.157004	0.157004	0.29267	0.29267	12.2612	12.2612	12.2612	12	1	0	0	0	1	1	5	0	0	0	0	0	0	1	0	0	1
1459540	01-JAN-12	03-JAN-12	4.2	18-AUG-16	131	18-AUG-16	139	18-AUG-16	0.79	18-AUG-16	9999999	23-JUL-16	37	23-JUL-16	37	23-JUL-16	480	23-JUL-16	3.6	15-DEC-15	1.12	Y	16.1181	16.1181	0.113329	0.113329	1	-0.235722	78.1957	40	40	40	1	1	1	0	1	12	60	0	2	0	0	0	0	0	0	0	999
1973676	12-APR-15	14-APR-15	6.6	16-AUG-16	95	16-AUG-16	136	16-AUG-16	0.97	16-AUG-16	2.4	16-AUG-16	29	16-AUG-16	15	16-AUG-16	146	16-AUG-16	3	28-DEC-15	1.21		0.875469	0.875469	0.19062	0.19062	1	-0.0304592	21.4442	21.4442	22.0566	22	1	1	0	0	1	2	8	0	0	0	0	0	1	0	1	0	999
1936608	30-NOV-08	30-NOV-08	13.1	30-NOV-08	409	30-NOV-08	143	30-NOV-08	0.77	30-NOV-08	9999999	30-NOV-08	27	30-NOV-08	22	30-NOV-08	46	30-NOV-08	3.8	30-NOV-08	0.90		16.1181	16.1181	-0.105361	-0.105361	1	-0.261365	75.7464	40	40	40	1	0	0	0	0	1	0	0	0	0	0	0	0	0	0	0	999
0271761	21-OCT-09	23-OCT-09	5.7	08-JUN-10	9999999	08-JUN-10	136	08-JUN-10	2.98	08-JUN-10	1.6	08-JUN-10	30	08-JUN-10	11	08-JUN-10	122	08-JUN-10	1.6	08-JUN-10	1.41	Y	0.470004	0.470004	0.34359	0.34359	1.09192	1.09192	22.5045	22.5045	23.0819	23	2	1	1	0	0	1	2	0	0	0	0	0	0	1	1	0	999
1945054	08-APR-10	12-APR-10	8.8	04-JUL-10	9999999	04-JUL-10	128	04-JUL-10	0.86	04-JUL-10	1.3	04-JUL-10	77	04-JUL-10	56	04-JUL-10	85	04-JUL-10	2.9	04-JUL-10	0.97		0.262364	0.262364	-0.0304592	-0.0304592	1	-0.150823	16.6506	16.6506	23.5854	24	3	1	1	1	1	1	4	0	0	0	0	0	0	1	0	0	999
0164148	28-JUL-10	30-JUL-10	11.3	12-OCT-10	87	12-OCT-10	153	12-OCT-10	0.78	12-OCT-10	9999999	12-OCT-10	77	12-OCT-10	29	12-OCT-10	92	12-OCT-10	2.2	12-OCT-10	1.68	Y	16.1181	16.1181	0.518794	0.518794	1	-0.248461	82.7369	40	40	40	0	1	1	1	1	2	6	1	0	0	0	0	1	1	1	0	999
0996140	06-NOV-11	02-DEC-11	21.7	29-NOV-11	9999999	29-NOV-11	126	29-NOV-11	3.68	29-NOV-11	30.6	29-NOV-11	111	29-NOV-11	74	29-NOV-11	104	29-NOV-11	3.7	29-NOV-11	3.24	Y	3.421	3.421	1.17557	1.17557	1.30291	1.30291	44.9967	40	40	40	2	0	0	0	1	1	26	0	0	0	1	0	1	0	0	0	999
0651530	10-FEB-12	11-FEB-12	4.1	22-FEB-12	99	22-FEB-12	136	22-FEB-12	0.5	22-FEB-12	2.1	22-FEB-12	124	22-FEB-12	60	22-FEB-12	184	22-FEB-12	9999999	22-FEB-12	1.40	Y	0.741937	0.741937	0.336472	0.336472	1	-0.693147	22.573	22.573	23.1481	23	1	1	1	1	1	1	1	0	0	0	0	0	0	1	1	0	999
1203381	26-NOV-08	02-DEC-08	12.2	29-OCT-12	33	29-OCT-12	136	29-OCT-12	1.54	29-OCT-12	2.6	26-OCT-12	47	26-OCT-12	56	26-OCT-12	205	26-OCT-12	1.4	26-OCT-12	1.75	Y	0.955511	0.955511	0.559616	0.559616	0.431782	0.431782	20.4417	20.4417	21.0871	21	1	1	1	0	0	10	55	1	1	0	0	0	0	0	0	0	999
0412298	29-DEC-14	30-DEC-14	9.1	24-JUN-16	9999999	24-JUN-16	132	24-JUN-16	3.73	24-JUN-16	0.4	24-JUN-16	80	24-JUN-16	71	24-JUN-16	206	24-JUN-16	3.2	16-OCT-15	0.95		1	-0.916291	-0.0512933	-0.0512933	1.31641	1.31641	22.2335	22.2335	25.165	25	1	1	1	0	1	4	15	1	0	0	0	0	0	0	1	0	999
1268861	21-MAR-10	23-MAR-10	4.2	08-OCT-14	9999999	08-OCT-14	137	08-OCT-14	0.76	08-OCT-14	2	08-OCT-14	58	08-OCT-14	47	08-OCT-14	74	08-OCT-14	3.4	08-OCT-14	1.17	Y	0.693147	0.693147	0.157004	0.157004	1	-0.274437	20.3785	20.3785	20.3785	20	1	1	1	1	1	3	7	0	0	0	0	0	0	1	0	0	1
8157255	29-JAN-14	04-FEB-14	5.8	01-JUL-16	160	01-JUL-16	137	01-JUL-16	9.79	01-JUL-16	1.2	01-JUL-16	23	01-JUL-16	31	01-JUL-16	49	01-JUL-16	3.3	30-DEC-15	1.06		0.182322	0.182322	0.0582689	0.0582689	2.28136	2.28136	29.6044	29.6044	29.6044	30	3	1	1	1	1	4	14	0	0	0	0	0	0	0	0	0	999
7093753	03-AUG-15	07-AUG-15	8.8	12-MAY-16	182	12-MAY-16	133	12-MAY-16	1.11	12-MAY-16	9999999	10-MAY-16	28	10-MAY-16	21	10-MAY-16	195	10-MAY-16	3.5	03-AUG-15	1.00	Y	16.1181	16.1181	0	0	0.10436	0.10436	68.3551	40	40	40	1	0	0	0	1	3	16	0	0	0	0	0	0	0	0	0	999
0233716	13-NOV-14	14-NOV-14	4.6	30-JUN-16	149	30-JUN-16	138	30-JUN-16	0.79	30-JUN-16	4.1	30-JUN-16	49	30-JUN-16	31	30-JUN-16	127	30-JUN-16	3.2	26-OCT-15	1.14	Y	1.41099	1.41099	0.131028	0.131028	1	-0.235722	22.801	22.801	22.2335	22	1	1	1	1	1	1	1	0	0	0	0	0	0	0	0	1	999
8021764	18-MAR-09	21-MAR-09	6.5	14-APR-09	176	14-APR-09	134	12-JUN-09	1.41	12-JUN-09	9999999	06-APR-09	27	18-MAR-09	12	18-MAR-09	107	18-MAR-09	3.1	18-MAR-09	1.15	Y	16.1181	16.1181	0.139762	0.139762	0.34359	0.34359	72.2099	40	40	40	1	1	1	1	1	2	14	1	0	0	0	0	0	0	0	0	999
1494292	21-JUL-09	07-AUG-09	6.4	31-AUG-09	9999999	31-AUG-09	132	31-AUG-09	1.83	31-AUG-09	3.9	29-AUG-09	75	29-AUG-09	25	29-AUG-09	46	29-AUG-09	1.9	29-AUG-09	1.44	Y	1.36098	1.36098	0.364643	0.364643	0.604316	0.604316	21.4418	21.4418	24.5039	25	1	1	1	1	1	3	40	2	0	0	0	0	1	0	0	0	999
1334354	12-SEP-09	14-SEP-09	9.7	23-AUG-14	221	23-AUG-14	132	23-AUG-14	0.78	23-AUG-14	9999999	30-MAR-11	189	12-SEP-09	61	12-SEP-09	379	12-SEP-09	2.3	12-SEP-09	1.19		16.1181	16.1181	0.173953	0.173953	1	-0.248461	78.8747	40	40	40	1	1	1	1	1	1	2	0	0	0	0	0	0	0	1	0	999
1923672	05-OCT-08	08-OCT-08	4.5	23-OCT-09	68	23-OCT-09	138	23-OCT-09	0.55	23-OCT-09	1.6	23-OCT-09	37	23-OCT-09	30	23-OCT-09	82	23-OCT-09	3.4	23-OCT-09	1.19	Y	0.470004	0.470004	0.173953	0.173953	1	-0.597837	19.7249	19.7249	19.0558	19	0	1	1	0	0	3	8	0	1	0	0	0	1	1	0	0	999
1445401	24-FEB-10	02-MAR-10	24.8	02-MAR-10	85	02-MAR-10	134	02-MAR-10	1.38	02-MAR-10	9999999	24-FEB-10	45	24-FEB-10	26	24-FEB-10	317	24-FEB-10	2.4	24-FEB-10	1.22	Y	16.1181	16.1181	0.198851	0.198851	0.322083	0.322083	72.6659	40	40	40	1	1	0	0	0	1	6	0	0	0	1	0	0	0	0	0	999
0616845	19-APR-10	23-APR-10	3.3	23-APR-10	117	23-APR-10	134	23-APR-10	0.72	23-APR-10	9999999	19-APR-10	89	19-APR-10	68	19-APR-10	168	19-APR-10	2.1	19-APR-10	1.24	Y	16.1181	16.1181	0.215111	0.215111	1	-0.328504	79.3356	40	40	40	1	1	1	1	1	1	4	0	0	0	0	0	1	0	0	1	999
1526969	19-JUL-10	20-JUL-10	9.1	20-JUL-10	102	20-JUL-10	140	20-JUL-10	1.31	20-JUL-10	4.5	20-JUL-10	105	20-JUL-10	67	20-JUL-10	133	20-JUL-10	2.6	20-JUL-10	1.45		1.50408	1.50408	0.371564	0.371564	0.270027	0.270027	18.8611	18.8611	16.7683	17	0	0	0	1	1	1	1	1	0	0	0	0	1	0	0	0	999
0874383	29-NOV-10	29-NOV-10	13.8	29-NOV-10	9999999	29-NOV-10	142	29-NOV-10	40.6	29-NOV-10	9999999	29-NOV-10	84	29-NOV-10	55	29-NOV-10	158	29-NOV-10	1.9	29-NOV-10	2.06		16.1181	16.1181	0.722706	0.722706	3.70377	3.70377	110.896	40	40	40	3	1	1	0	0	1	1	0	0	1	0	0	1	0	0	0	999
2136649	18-DEC-12	28-DEC-12	5.6	07-JUN-16	9999999	07-JUN-16	142	06-JUN-16	1.08	06-JUN-16	0.4	06-JUN-16	26	06-JUN-16	27	06-JUN-16	80	06-JUN-16	4	01-JUN-15	1.07	Y	1	-0.916291	0.0676586	0.0676586	0.076961	0.076961	11.7043	11.7043	7.0355	7	1	1	1	1	1	1	10	0	0	0	0	0	0	1	0	0	999
0890096	16-MAR-12	19-MAR-12	9.2	19-AUG-13	288	19-AUG-13	130	19-AUG-13	5.2	19-AUG-13	0.6	18-AUG-13	25	18-AUG-13	20	18-AUG-13	231	18-AUG-13	2.2	18-AUG-13	1.35	Y	1	-0.510826	0.300105	0.300105	1.64866	1.64866	29.3488	29.3488	31.8093	32	2	0	1	0	1	11	57	5	3	0	0	0	0	0	0	0	999
0690203	25-MAR-13	06-APR-13	19.6	03-JUL-13	96	03-JUL-13	132	03-JUL-13	1.87	03-JUL-13	9999999	03-JUL-13	32	03-JUL-13	47	03-JUL-13	135	03-JUL-13	2.3	03-JUL-13	1.84		16.1181	16.1181	0.609766	0.609766	0.625938	0.625938	80.176	40	40	40	2	0	0	0	1	2	32	0	1	0	0	0	0	0	1	0	999
0398106	08-FEB-14	10-MAR-14	2.9	16-AUG-16	92	16-AUG-16	136	16-AUG-16	1.08	16-AUG-16	9999999	11-AUG-16	31	11-AUG-16	15	11-AUG-16	54	11-AUG-16	3.4	03-MAY-14	1.20	Y	16.1181	16.1181	0.182322	0.182322	0.076961	0.076961	70.1349	40	40	40	1	0	0	0	0	2	65	0	0	0	0	0	1	1	1	0	999
2214196	21-MAR-14	31-MAR-14	10.5	15-MAY-14	45	15-MAY-14	131	15-MAY-14	4.91	15-MAY-14	9999999	11-MAY-14	22	04-MAY-14	16	04-MAY-14	70	04-MAY-14	3.2	04-MAY-14	1.90	Y	16.1181	16.1181	0.641854	0.641854	1.59127	1.59127	89.7737	40	40	40	2	1	1	1	1	2	36	0	1	0	0	0	1	0	0	0	999
0284755	07-AUG-14	09-AUG-14	8.4	09-AUG-14	215	09-AUG-14	132	09-AUG-14	1.09	09-AUG-14	9999999	07-AUG-14	35	07-AUG-14	19	07-AUG-14	65	07-AUG-14	9999999	08-AUG-14	1.35		16.1181	16.1181	0.300105	0.300105	0.0861777	0.0861777	71.5423	40	40	40	1	1	1	1	1	1	2	0	0	0	0	0	0	0	1	0	999
7042156	19-DEC-14	21-DEC-14	6.3	21-DEC-14	56	21-DEC-14	140	21-DEC-14	0.39	21-DEC-14	9999999	19-DEC-14	28	19-DEC-14	26	19-DEC-14	242	19-DEC-14	2.5	19-DEC-14	1.20		16.1181	16.1181	0.182322	0.182322	1	-0.941609	78.9684	40	40	40	1	1	0	0	0	1	2	0	0	0	0	0	0	0	1	0	999
1878043	29-JAN-13	01-FEB-13	6.1	29-MAY-15	135	29-MAY-15	137	29-MAY-15	1.11	29-MAY-15	0.8	29-MAY-15	52	29-MAY-15	99	29-MAY-15	79	29-MAY-15	4.5	29-MAY-15	0.99	Y	1	-0.223144	-0.0100503	-0.0100503	0.10436	0.10436	11.0962	11.0962	11.0962	11	1	0	0	0	1	1	3	0	0	0	0	0	1	1	1	0	999
0909315	22-NOV-14	26-NOV-14	6.7	20-AUG-15	94	20-AUG-15	140	20-AUG-15	1.22	20-AUG-15	6.7	20-AUG-15	86	20-AUG-15	43	20-AUG-15	69	20-AUG-15	1.9	20-AUG-15	1.71	Y	1.90211	1.90211	0.536493	0.536493	0.198851	0.198851	21.5317	21.5317	19.7033	20	1	1	1	0	1	4	21	0	2	0	0	0	0	0	0	0	999
7000133	06-OCT-15	13-OCT-15	6.6	09-OCT-15	104	09-OCT-15	139	09-OCT-15	1.24	09-OCT-15	9999999	12-OCT-15	44	06-OCT-15	31	06-OCT-15	122	06-OCT-15	2.1	06-OCT-15	1.37	Y	16.1181	16.1181	0.314811	0.314811	0.215111	0.215111	72.9409	40	40	40	1	0	0	0	1	1	7	0	0	0	0	0	0	1	1	0	999
1236184	15-DEC-08	25-JAN-09	5.8	25-JAN-09	158	25-JAN-09	137	25-JAN-09	2.98	25-JAN-09	1.9	19-JAN-09	26	19-JAN-09	12	19-JAN-09	91	19-JAN-09	3.8	19-JAN-09	2.36	Y	0.641854	0.641854	0.858662	0.858662	1.09192	1.09192	28.9229	28.9229	28.9229	29	3	1	0	0	1	1	30	0	0	0	0	0	1	0	0	0	999
0265489	26-JAN-09	27-JAN-09	5.2	26-JAN-09	9999999	26-JAN-09	136	26-JAN-09	4.76	26-JAN-09	22	26-JAN-09	448	26-JAN-09	132	26-JAN-09	111	26-JAN-09	1.1	26-JAN-09	7.65	Y	3.09104	3.09104	2.03471	2.03471	1.56025	1.56025	55.8344	40	40	40	0	0	0	0	0	1	0	0	0	0	1	0	1	1	0	1	999
1793063	10-DEC-08	20-DEC-08	6.9	21-APR-09	251	21-APR-09	140	21-APR-09	2.3	21-APR-09	1.4	14-APR-09	24	14-APR-09	18	14-APR-09	89	14-APR-09	2.6	14-APR-09	1.11		0.336472	0.336472	0.10436	0.10436	0.832909	0.832909	16.8416	16.8416	14.549	15	0	0	1	1	1	3	44	0	1	0	0	0	1	0	0	0	999
0230879	24-APR-10	29-APR-10	7	27-APR-10	271	27-APR-10	141	27-APR-10	0.89	27-APR-10	0.8	27-APR-10	33	27-APR-10	57	27-APR-10	150	27-APR-10	2.1	27-APR-10	0.99		1	-0.223144	-0.0100503	-0.0100503	1	-0.116534	19.6674	19.6674	16.9835	17	3	1	0	0	1	1	5	0	0	0	0	0	0	0	0	0	999
1738032	05-SEP-10	07-SEP-10	5.2	20-SEP-10	152	20-SEP-10	139	20-SEP-10	1.7	20-SEP-10	9999999	20-SEP-10	23	20-SEP-10	26	20-SEP-10	86	20-SEP-10	3.8	20-SEP-10	1.18	Y	16.1181	16.1181	0.165514	0.165514	0.530628	0.530628	74.2883	40	40	40	0	1	0	0	0	1	2	0	0	1	0	0	1	0	0	0	999
2072614	16-MAR-11	26-MAR-11	11.6	23-MAR-11	9999999	23-MAR-11	127	23-MAR-11	7.29	23-MAR-11	21.8	23-MAR-11	115	23-MAR-11	74	23-MAR-11	244	23-MAR-11	3.6	23-MAR-11	1.66		3.08191	3.08191	0.506818	0.506818	1.9865	1.9865	42.7668	40	40	40	1	0	1	0	1	1	10	0	0	0	1	0	0	0	1	0	999
2054187	13-JUN-11	17-JUN-11	18.3	27-JUN-11	78	27-JUN-11	146	27-JUN-11	2.49	27-JUN-11	9999999	22-JUN-11	79	20-JUN-11	47	20-JUN-11	196	20-JUN-11	2.8	27-JUN-11	1.37	Y	16.1181	16.1181	0.314811	0.314811	0.912283	0.912283	79.6128	40	40	40	2	1	1	0	1	2	15	1	0	0	1	0	0	0	1	0	999
0215181	01-JUL-11	06-JUL-11	2.3	06-JUL-11	48	06-JUL-11	138	06-JUL-11	4.72	06-JUL-11	25	06-JUL-11	255	06-JUL-11	233	06-JUL-11	85	06-JUL-11	3.4	06-JUL-11	1.99	Y	3.21888	3.21888	0.688135	0.688135	1.55181	1.55181	41.1553	40	40	40	1	0	0	0	1	1	5	0	0	0	0	0	1	0	0	1	999
2115020	25-MAY-12	27-MAY-12	8.3	27-MAY-12	9999999	27-MAY-12	134	27-MAY-12	1.67	27-MAY-12	3.3	27-MAY-12	53	27-MAY-12	33	27-MAY-12	83	27-MAY-12	1.5	27-MAY-12	2.19	Y	1.19392	1.19392	0.783902	0.783902	0.512824	0.512824	24.6304	24.6304	26.152	26	2	0	0	0	1	1	2	0	0	0	0	0	1	0	1	0	999
1936011	14-JUL-11	21-JUL-11	3.9	10-NOV-12	73	10-NOV-12	139	10-NOV-12	0.9	10-NOV-12	2.1	08-NOV-12	41	08-NOV-12	13	08-NOV-12	41	08-NOV-12	2.9	08-NOV-12	1.09	Y	0.741937	0.741937	0.0861777	0.0861777	1	-0.105361	19.7697	19.7697	18.4345	18	1	0	1	0	1	2	20	0	0	0	0	0	0	0	1	0	999
0396224	25-JUN-13	29-JUN-13	4.6	28-JUN-13	36	28-JUN-13	138	28-JUN-13	1.57	28-JUN-13	3	26-JUN-13	78	26-JUN-13	29	26-JUN-13	90	26-JUN-13	2.7	26-JUN-13	2.34	Y	1.09861	1.09861	0.850151	0.850151	0.451076	0.451076	24.4212	24.4212	23.9071	24	1	0	0	1	1	1	4	0	0	0	0	0	1	0	0	0	999
0461184	09-JUL-13	11-JUL-13	10.7	11-JUL-13	9999999	11-JUL-13	134	11-JUL-13	1.25	11-JUL-13	8.7	11-JUL-13	2739	11-JUL-13	524	11-JUL-13	228	11-JUL-13	2	11-JUL-13	3.07	Y	2.16332	2.16332	1.12168	1.12168	0.223144	0.223144	29.3056	29.3056	30.3644	30	1	0	0	0	1	1	2	0	0	0	1	0	0	0	0	0	999
0474382	05-NOV-13	06-NOV-13	2.4	06-NOV-13	9999999	06-NOV-13	133	06-NOV-13	0.88	06-NOV-13	2.1	06-NOV-13	138	06-NOV-13	60	06-NOV-13	96	06-NOV-13	2.1	06-NOV-13	1.87		0.741937	0.741937	0.625938	0.625938	1	-0.127833	25.815	25.815	27.6874	28	0	0	0	0	0	1	1	0	0	0	0	0	1	1	0	0	999
8215543	17-MAR-14	06-APR-14	24.4	19-APR-14	9999999	19-APR-14	128	19-APR-14	0.71	19-APR-14	20.6	19-APR-14	125	19-APR-14	61	19-APR-14	138	19-APR-14	2.5	19-APR-14	1.79	Y	3.02529	3.02529	0.582216	0.582216	1	-0.34249	33.9564	33.9564	35.7514	36	1	0	0	0	0	2	51	1	0	0	0	0	0	0	1	0	999
2092275	12-MAY-14	25-MAY-14	9.7	19-JUN-14	128	19-JUN-14	135	19-JUN-14	3.46	19-JUN-14	1	19-JUN-14	58	19-JUN-14	29	19-JUN-14	117	19-JUN-14	2.9	19-JUN-14	1.37	Y	0	0	0.314811	0.314811	1.24127	1.24127	21.8348	21.8348	23.0337	23	1	0	0	0	1	2	56	0	1	0	0	1	1	0	0	0	999
1705945	22-DEC-08	24-DEC-08	6.6	24-NOV-14	186	24-NOV-14	139	24-NOV-14	1.5	24-NOV-14	0.5	24-NOV-14	17	24-NOV-14	11	24-NOV-14	34	24-NOV-14	4.4	24-NOV-14	1.0	Y	1	-0.693147	0	0	0.405465	0.405465	14.0903	14.0903	12.3803	12	1	1	0	0	0	3	5	0	0	1	0	0	1	0	1	0	999
0744232	16-MAR-15	24-MAR-15	9.9	23-MAR-15	170	23-MAR-15	140	24-MAR-15	0.94	24-MAR-15	1.6	18-MAR-15	79	18-MAR-15	34	18-MAR-15	642	18-MAR-15	2.3	08-APR-15	1.71	Y	0.470004	0.470004	0.536493	0.536493	1	-0.0618754	23.7853	23.7853	22.1801	22	1	0	1	0	1	1	8	0	0	0	1	0	0	0	1	0	999
0486136	22-JUL-14	24-JUL-14	3	24-APR-15	79	24-APR-15	137	24-APR-15	0.33	24-APR-15	1.2	21-APR-15	46	21-APR-15	32	21-APR-15	177	21-APR-15	3.3	24-APR-15	1.21	Y	0.182322	0.182322	0.19062	0.19062	1	-1.10866	18.8241	18.8241	18.8241	19	2	0	1	0	1	3	90	1	0	0	0	0	0	0	1	0	999
1022851	09-MAY-15	19-MAY-15	1.4	19-MAY-15	9999999	19-MAY-15	137	19-MAY-15	0.5	19-MAY-15	1.1	19-MAY-15	50	19-MAY-15	17	19-MAY-15	62	19-MAY-15	1.9	19-MAY-15	1.61		0.0953102	0.0953102	0.476234	0.476234	1	-0.693147	21.6941	21.6941	21.6941	22	1	0	0	0	1	1	10	0	0	0	0	0	0	1	0	0	999
1555375	28-OCT-12	29-OCT-12	7.9	12-JUN-16	173	12-JUN-16	124	11-JUN-16	1.73	11-JUN-16	9999999	01-JUN-16	63	24-MAY-16	35	24-MAY-16	540	24-MAY-16	4.4	12-NOV-15	3.34	Y	16.1181	16.1181	1.20597	1.20597	0.548121	0.548121	86.1088	40	40	40	1	0	1	0	0	9	69	4	1	0	1	0	0	0	0	0	999
[truncated: 10 more columns]

## Sheet: SQL
	WITH Cirrhosis AS ( SELECT * FROM (SELECT PAT.pat_mrn_id , pat.pat_id , pedx.pat_enc_csn_id ,HOSP_ADMSN_TIME ,HOSP_DISCH_TIME ,ZC_PAT_STATUS.NAME ,EDG.current_icd9_list ,EDG.current_icd10_list , edg.dx_name , RANK() OVER (PARTITION BY PEH.PAT_ID ORDER BY PEH.pat_enc_csn_id DESC) AS RNK from pat_enc_hsp peh inner join patient pat on peh.pat_id = pat.pat_id inner join pat_enc_dx pedx on peh.pat_enc…

## Sheet: Included
PAT_MRN_ID	HOSP_ADMSN_TIME	HOSP_DISCH_TIME	WBC_VAL	WBC_RSLT_DT	PLATELET_VAL	PLATELET_RSLT_DT	SODIUM_VAL	SODIUM_RSLT_DT	CREATININE_VAL	CREATININE_RSLT_DT	BILIRUBIN_VAL	BILIRUBIN_RSLT_DT	AST_VAL	AST_RSLT_DT	ALT_VAL	ALT_RSLT_DT	ALP_VAL	ALP_RSLT_DT	ALBUMIN_VAL	ALBUMIN_RSLT_DT	INR	TRNSFSN	Tested LnL	Ln L	Tested LnV	Ln V	Tested LnJ	LnJ	Score	MELD score	MELD(i) + 1.32*(137-Na) – [0.033*MELD(i)*(137-Na)]	MELD-NA	Ethnicity (1 = Non-Hispanic White, 2 = Hispanic, 3 = Black or African American, 4 = Asian, 5 = American Indian & Alaska Native, 6 = Native Hawaiian & Other Pacific Islander, 7= Two or more races, 0 = Unknown/Information unavailable)	Hx of DM (0,1)	Hx of CAD or CHF (0,1)	Hx of COPD (0,1)	Hx of Smoking (0,1)	# of admissions during study period	Total hospital days admitted	# of 30 day readmissions	# of 90 day readmissions	Obtained liver transplantation (0,1)	30 day mortality (0,1)	90 day mortality (0,1)	Presence of encephalopathy (0,1)	Presensce of Varices (0,1)	Presence of ascities (0,1)	History of liver cancer (0,1)	Correct use of BB in the setting of variceal bleeding (0,1)
1072547	01-JUN-12	05-JUN-12	4.4	2018-05-07	81	2018-04-30	132	2018-05-07	1.03	2018-05-07	19.7	2018-05-07	364	2018-05-07	121	2018-05-07	278	2018-05-07	2.5	2018-05-07	1.42	Y	2.98062	2.98062	0.350657	0.350657	0.0295588	0.0295588	21.907	21.907	24.8923	25	3	0	0	0	1	3	6	0	0	0	0	0	0	0	1	0	1
1076287	22-OCT-12	25-OCT-12	8.8	06-SEP-15	270	06-SEP-15	138	06-SEP-15	1.01	06-SEP-15	5.4	06-SEP-15	80	06-SEP-15	22	06-SEP-15	216	06-SEP-15	2	06-SEP-15	1.42		1.6864	1.6864	0.350657	0.350657	0.00995033	0.00995033	16.8272	16.8272	16.0625	16	1	0	0	0	1	1	3	0	0	0	0	0	0		1	0
7128404	2016-08-22	2016-08-23	5.4	2017-07-05	142	2017-07-05	138	2017-07-05	0.84	2017-07-05	1.3	2017-07-05	31	2017-07-05	24	2017-07-05	141	2017-07-05	3.5	2017-07-05	1.55	Y	0.262364	0.262364	0.438255	0.438255	1	-0.174353	21.9002	21.9002	21.3029	21	1	0	0	0	0	1	0	0	0	0	0	0	0	1	1	0	1
1319255	2013-09-29	2013-10-10	6.5	10-OCT-13	212	10-OCT-13	120	10-OCT-13	1.39	10-OCT-13	2.7	07-OCT-13	63	07-OCT-13	26	07-OCT-13	92	07-OCT-13	1.8	07-OCT-13	1.20	N	0.993252	0.993252	0.182322	0.182322	0.329304	0.329304	15.3779	15.3779	29.1909	29	1	0	0	0	1	4	40	3	3	0	0	0	1	0	1	0
0993114	20-JUL-13	23-JUL-13	5.9	21-JUL-14	85	21-JUL-14	140	21-JUL-14	0.58	21-JUL-14	3.6	21-JUL-14	291	21-JUL-14	83	21-JUL-14	182	21-JUL-14	2.1	21-JUL-14	1.18		1.28093	1.28093	0.165514	0.165514	1	-0.544727	22.6957	22.6957	20.9826	21	1	0	0	0	1	5	73	2	2		0	0	1	1	1	1	0
7019091	28-OCT-14	30-OCT-14	3.9	29-OCT-14	102	29-OCT-14	137	29-OCT-14	1.89	29-OCT-14	3	29-OCT-14	121	29-OCT-14	55	29-OCT-14	171	29-OCT-14	1.9	29-OCT-14	1.66	Y	1.09861	1.09861	0.506818	0.506818	0.636577	0.636577	22.3512	22.3512	22.3512	22	4	0	0	0	1	2	27	1	1	0	1	1	1	1	1	0	1
2010568	09-NOV-09	16-NOV-09	4.8	2018-01-27	137	2018-01-27	142	2018-01-27	0.7	2018-01-27	1.4	2018-01-27	39	2018-01-27	32	2018-01-27	226	2018-01-27	2.6	2018-01-27	1.29	Y	0.336472	0.336472	0.254642	0.254642	1	-0.356675	20.1239	20.1239	16.8443	17	2	0	1	0	1	3	35	0	1	0	0	0	1	1	1	0	1
2109188	16-NOV-11	18-NOV-11	4	18-NOV-11	98	18-NOV-11	139	18-NOV-11	0.65	18-NOV-11	0.9	16-NOV-11	45	16-NOV-11	30	16-NOV-11	157	16-NOV-11	2.6	16-NOV-11	1.33		1	-0.105361	0.285179	0.285179	1	-0.430783	22.974	22.974	21.8503	22		1	1	0	0	1	2	0	0	0	0	0	1		0	0
1329568	29-JAN-13	01-FEB-13	2.4	2013-06-28	50	2013-06-28	139	2013-06-28	0.59	2013-06-28	18.1	2013-06-28	64	2013-06-28	40	2013-06-28	55	2013-06-28	2.7	28-JUN-13	3.07	Y	2.89591	2.89591	1.12168	1.12168	1	-0.527633	39.5093	39.5093	39.477	39	2	0	0	0	0	3	28	1	0	0	0	0	0	1	1	0	1
0513286	03-AUG-13	05-AUG-13	5.4	10-AUG-13	154	10-AUG-13	133	10-AUG-13	1.12	10-AUG-13	0.7	04-AUG-13	21	04-AUG-13	11	04-AUG-13	121	04-AUG-13	3.3	04-AUG-13	1.18		1	-0.356675	0.165514	0.165514	0.113329	0.113329	13.1483	13.1483	16.6927	17	1	0	0	1	1	3	9	1	1	0	0	0	1	1	1	0
2294124	11-FEB-14	24-FEB-14	5.9	23-FEB-14	164	23-FEB-14	136	23-FEB-14	0.75	23-FEB-14	0.7	11-FEB-14	80	11-FEB-14	35	11-FEB-14	95	11-FEB-14	3.3	11-FEB-14	1.15	Y	1	-0.356675	0.139762	0.139762	1	-0.287682	21.3453	21.3453	21.9609	22	1	0	0	1	1	1	13	0	0	0	0	0	1	1	0	0	1
2230355	01-JUN-14	05-JUN-14	2.4	05-JUN-14	55	05-JUN-14	137	04-JUN-14	0.38	04-JUN-14	1.9	02-JUN-14	55	02-JUN-14	36	02-JUN-14	200	02-JUN-14	3	11-JUN-14	1.22	Y	0.641854	0.641854	0.198851	0.198851	1	-0.967584	20.6533	20.6533	20.6533	21		0	0	0	1	1	4	0	0	0	0	0	0	0	0	0
1414046	01-FEB-15	07-FEB-15	25.3	04-FEB-15	35	04-FEB-15	133	04-FEB-15	0.58	04-FEB-15	5.4	01-FEB-15	53	01-FEB-15	35	01-FEB-15	216	01-FEB-15	2.3	01-FEB-15	1.37		1.6864	1.6864	0.314811	0.314811	1	-0.544727	25.9005	25.9005	27.7616	28	2	0	0	0	0	2	11	0	0	0	0	0	1	1	1	1	1
0233353	27-JUL-15	30-JUL-15	4.2	22-AUG-15	90	22-AUG-15	136	22-AUG-15	0.86	22-AUG-15	7.1	22-AUG-15	84	22-AUG-15	24	22-AUG-15	49	22-AUG-15	3.2	22-AUG-15	1.32	Y	1.96009	1.96009	0.277632	0.277632	1	-0.150823	26.5186	26.5186	26.9635	27	2	1	0	0	1	2	4	0	0	0	0	0	1	1	1	0	1
0371057	20-SEP-15	22-SEP-15	4.6	22-SEP-15	132	22-SEP-15	136	22-SEP-15	1.95	22-SEP-15	1.2	22-SEP-15	46	22-SEP-15	21	22-SEP-15	125	22-SEP-15	2.4	22-SEP-15	1.39	Y	0.182322	0.182322	0.329304	0.329304	0.667829	0.667829	17.1985	17.1985	17.951	18	1	0	0	0	1	4	23	1	2	0	0	0	1	1	1	0	1
1236431	09-MAR-15	11-MAR-15	6.3	15-AUG-16	140	15-AUG-16	137	15-AUG-16	1.43	15-AUG-16	1.1	15-AUG-16	32	15-AUG-16	40	15-AUG-16	100	15-AUG-16	2.3	29-DEC-15	1.51		0.0953102	0.0953102	0.41211	0.41211	0.357674	0.357674	14.8288	14.8288	14.8288	15	1	0	0	0	1	4	15	2	4	1	0	0	1	1	1	1	1
2219453	19-JAN-13	21-JAN-13	9.4	21-JAN-13	39	21-JAN-13	135	21-JAN-13	1.23	21-JAN-13	6.1	21-JAN-13	30	21-JAN-13	23	21-JAN-13	91	21-JAN-13	2.3	21-JAN-13	1.24		1.80829	1.80829	0.215111	0.215111	0.207014	0.207014	17.6557	17.6557	19.1304	19	1	0	0	1	1	1	2	0	0	0	0	0	0	0	0	0
2015808	25-NOV-13	27-NOV-13	3.7	25-NOV-13	106	25-NOV-13	128	26-NOV-13	0.69	25-NOV-13	1.1	25-NOV-13	36	25-NOV-13	21	25-NOV-13	179	25-NOV-13	2	25-NOV-13	1.11	Y	0.0953102	0.0953102	0.10436	0.10436	1	-0.371064	17.5291	17.5291	24.203	24	1	0	0	0	1	2	3	0	1	0	0	0	1	1	1	0
1851242	27-SEP-14	01-OCT-14	3.1	01-OCT-14	101	01-OCT-14	135	01-OCT-14	3.22	01-OCT-14	0.9	30-SEP-14	34	27-SEP-14	21	27-SEP-14	84	27-SEP-14	2.6	27-SEP-14	1.13	Y	1	-0.105361	0.122218	0.122218	1.16938	1.16938	22.7698	22.7698	23.907	24	5	1	1	1	1	20	99	12	6	0	1	0	1	1	1	0	1
0304947	09-NOV-15	12-NOV-15	3.2	19-NOV-15	30	19-NOV-15	128	20-NOV-15	0.66	20-NOV-15	4.7	19-NOV-15	77	19-NOV-15	60	19-NOV-15	249	19-NOV-15	2.5	19-NOV-15	1.39	Y	1.54756	1.54756	0.329304	0.329304	1	-0.415515	25.538	25.538	29.8332	30	1	1	0	1	1	7	38	2	6	0	0	0	1	1	1	0	1
0810976	28-OCT-13	30-OCT-13	4.6	26-JAN-14	110	26-JAN-14	137	26-JAN-14	0.75	26-JAN-14	2.6	26-JAN-14	68	26-JAN-14	44	26-JAN-14	117	26-JAN-14	3.2	26-JAN-14	1.13		0.955511	0.955511	0.122218	0.122218	1	-0.287682	20.9807	20.9807	20.9807	21	2	0	0	0	1	9	55	6	2	0	0	0	1	1	1	0	1
2228649	18-MAR-13	22-MAR-13	6.8	29-JUN-15	124	29-JUN-15	137	29-JUN-15	0.73	29-JUN-15	0.7	29-JUN-15	40	29-JUN-15	30	29-JUN-15	92	29-JUN-15	3.5	29-JUN-15	1.04		1	-0.356675	0.0392207	0.0392207	1	-0.314711	20.2193	20.2193	20.2193	20	2	1	0	0	0	1	4	0	0	0	0	0	0	1	1	0	1
7096498	01-AUG-15	18-AUG-15	12.4	18-AUG-15	77	18-AUG-15	132	18-AUG-15	0.69	18-AUG-15	8.9	18-AUG-15	90	18-AUG-15	52	18-AUG-15	81	18-AUG-15	1.9	18-AUG-15	2.15	Y	2.18605	2.18605	0.765468	0.765468	1	-0.371064	32.8365	32.8365	34.0185	34	1	1	0	0	0	1	17	0	0	0	0	0	1	0	0	0	1
7092267	08-AUG-15	25-AUG-15	8.7	19-AUG-15	69	19-AUG-15	140	22-AUG-15	1.75	22-AUG-15	11.3	19-AUG-15	16	19-AUG-15	7	19-AUG-15	68	19-AUG-15	3	19-AUG-15	1.42	Y	2.4248	2.4248	0.350657	0.350657	0.559616	0.559616	24.8786	24.8786	23.3816	23	1	0	0	0	0	2	22	1	0	0	0	0	0	0	1	0
7055337	12-FEB-15	14-FEB-15	6.2	16-MAY-16	150	16-MAY-16	140	16-MAY-16	0.89	16-MAY-16	0.6	16-MAY-16	29	16-MAY-16	24	16-MAY-16	66	16-MAY-16	3.7	06-OCT-15	1.12	Y	1	-0.510826	0.113329	0.113329	1	-0.116534	21.0493	21.0493	19.1732	19	1	0	0	0	1	2	5	0	0	0	0	0	0	0	1	0
0774944	19-AUG-14	21-AUG-14	1.7	15-AUG-16	25	15-AUG-16	140	15-AUG-16	64.56	15-AUG-16	1.5	15-AUG-16	24	15-AUG-16	20	15-AUG-16	47	15-AUG-16	3.6	09-DEC-15	1.18	Y	0.405465	0.405465	0.165514	0.165514	4.1676	4.1676	49.7003	40	40	40	4	1	0	0	0	21	81	6	6	0	0	0	1	1	1	0	1
7035499	18-NOV-14	22-NOV-14	20.6	22-NOV-14	274	22-NOV-14	135	22-NOV-14	0.53	22-NOV-14	14.7	22-NOV-14	262	22-NOV-14	28	22-NOV-14	431	22-NOV-14	1.5	22-NOV-14	1.57	Y	2.68785	2.68785	0.451076	0.451076	1	-0.634878	31.2121	31.2121	31.7921	32	1	0	0	0	1	1	4	0	0	0	0	0	1	0	1	0
1152635	24-AUG-10	25-AUG-10	9	02-MAY-16	188	02-MAY-16	138	02-MAY-16	0.93	02-MAY-16	0.9	02-MAY-16	22	02-MAY-16	20	02-MAY-16	50	02-MAY-16	4.1	10-NOV-15	0.98	Y	1	-0.105361	-0.0202027	-0.0202027	1	-0.0725707	19.5537	19.5537	18.879	19	2	0	0	0	1	6	34	1	2	1	0	0	1	0	1	0
0157855	10-MAY-15	14-MAY-15	3.4	14-JUN-16	59	14-JUN-16	138	14-JUN-16	2.03	14-JUN-16	2.7	11-JUN-16	34	11-JUN-16	12	11-JUN-16	86	11-JUN-16	3.5	10-MAY-15	1.18	Y	0.993252	0.993252	0.165514	0.165514	0.708036	0.708036	18.8142	18.8142	18.115	18	4	1	0	1	1	9	76	2	2	0			1	1	1	0	1
0644011	03-DEC-11	07-DEC-11	2.8	03-MAY-15	101	03-MAY-15	135	03-MAY-15	0.55	03-MAY-15	1.7	03-MAY-15	104	03-MAY-15	19	03-MAY-15	160	03-MAY-15	2.3	03-MAY-15	1.43		0.530628	0.530628	0.357674	0.357674	1	-0.597837	22.0117	22.0117	23.199	23	3	0	0	0	0	2	3	0	0	0	0	0	0	0	1	0	1
0336729	16-FEB-15	28-FEB-15	3.1	22-JUL-16	30	22-JUL-16	142	22-JUL-16	1.26	22-JUL-16	21.8	22-JUL-16	45	22-JUL-16	21	22-JUL-16	42	22-JUL-16	2.1	23-MAY-15	1.63	Y	3.08191	3.08191	0.48858	0.48858	0.231112	0.231112	25.7635	25.7635	23.4144	23	2	1	0	0	1	6	94	2	3	0	1	0	1	1	1	0	1
1422473	29-JAN-10	31-JAN-10	11.7	09-MAR-16	22	09-MAR-16	134	09-MAR-16	3.54	09-MAR-16	6.7	09-MAR-16	270	09-MAR-16	108	09-MAR-16	63	09-MAR-16	2.5	18-NOV-15	1.15	Y	1.90211	1.90211	0.139762	0.139762	1.26413	1.26413	27.283	27.283	28.542	29	4	1	0	0	1	1	4	0	0	0	1	0	1	1	1	0	0
1535521	04-JUN-12	07-JUN-12	12.7	18-APR-16	152	18-APR-16	135	17-MAY-16	1.48	17-MAY-16	0.9	2016-03-03	95	30-MAR-16	62	30-MAR-16	167	30-MAR-16	2.6	14-DEC-15	0.94		1	-0.105361	-0.0618754	-0.0618754	0.392042	0.392042	13.2688	13.2688	15.0331	15	2	1	0	0	1	1	1	0	0	0	0	0	1	1	0	0	0
1879912	09-JUL-13	11-JUL-13	8.8	31-AUG-13	151	31-AUG-13	143	31-AUG-13	1.01	31-AUG-13	1.5	16-AUG-13	56	16-AUG-13	31	16-AUG-13	66	16-AUG-13	2.7	16-AUG-13	1.24		0.405465	0.405465	0.215111	0.215111	0.00995033	0.00995033	10.4671	10.4671	4.61962	5	4	1	0	1	1	3	16	1	2	0	0	0	1	0	0	0
8438974	08-JUN-14	10-JUN-14	18.4	02-JUL-14	140	02-JUL-14	129	03-JUL-14	2.1	03-JUL-14	0.9	03-JUL-14	22	08-JUN-14	27	08-JUN-14	124	08-JUN-14	2.6	08-JUN-14	1.22		1	-0.105361	0.198851	0.198851	0.741937	0.741937	19.5375	19.5375	24.9396	25	1	1	1	1	1	3	7	1	0	0	0	0	0	0	1	0
1204382	11-FEB-15	13-FEB-15	1.8	01-MAY-16	57	01-MAY-16	134	01-MAY-16	0.61	01-MAY-16	2	2018-02-09	44	18-APR-16	28	18-APR-16	160	18-APR-16	2.6	22-OCT-15	1.63	Y	0.693147	0.693147	0.48858	0.48858	1	-0.494296	24.0922	24.0922	25.6671	26	2	1	0	0	0	6	21	0	0	0	0	0	1	1	1	0	1
1836825	03-SEP-13	10-SEP-13	6	23-SEP-13	61	23-SEP-13	132	23-SEP-13	5.92	23-SEP-13	2	23-SEP-13	47	23-SEP-13	23	23-SEP-13	93	23-SEP-13	1.9	23-SEP-13	1.54	Y	0.693147	0.693147	0.431782	0.431782	1.77834	1.77834	30.9047	30.9047	32.4055	32	3	0	1	1	1	4	33	2	0	0	0	0	1	1	1	0	1
2137181	01-JUL-14	05-JUL-14	7.4	22-JUL-14	195	22-JUL-14	129	12-AUG-14	1.67	12-AUG-14	1.6	05-AUG-14	69	05-AUG-14	36	05-AUG-14	162	05-AUG-14	2.7	05-AUG-14	1.09		0.470004	0.470004	0.0861777	0.0861777	0.512824	0.512824	14.0795	14.0795	20.9225	21	1	1	1	0	0	2	6	0	1	0	0	0	0	0	1	0
7092789	17-JUL-15	23-JUL-15	2	21-JUL-16	61	21-JUL-16	136	21-JUL-16	0.91	21-JUL-16	1.1	21-JUL-16	65	21-JUL-16	73	21-JUL-16	137	21-JUL-16	3.7	12-AUG-15	1.11	Y	0.0953102	0.0953102	0.10436	0.10436	1	-0.0943107	17.5291	17.5291	18.2706	18	1	1	1	0	1	1	6	0	0	0	0	0	0	1	1	0	1
1571228	05-JUN-12	08-JUN-12	7.8	05-APR-16	228	05-APR-16	142	19-AUG-16	1	19-AUG-16	0.3	05-APR-16	30	05-APR-16	22	05-APR-16	111	05-APR-16	3.8	01-DEC-15	0.96	Y	1	-1.20397	-0.040822	-0.040822	0	0	9.75279	9.75279	4.762	5	1	0	0	1	1	1	2	0	0	0	0	0	0	0	1	0
2285857	15-DEC-13	17-DEC-13	3	17-DEC-13	45	17-DEC-13	132	17-DEC-13	0.61	17-DEC-13	1.4	15-DEC-13	45	15-DEC-13	28	15-DEC-13	127	15-DEC-13	2.6	15-DEC-13			0.336472	0.336472	1	#NUM!	1	-0.494296	28.4719	28.4719	30.374	30	3	1	0	0	1	1	2	0	0	0	0	0	0	0	1	0
2234413	26-APR-13	02-MAY-13	4.8	01-MAY-13	136	2013-04-30	138	01-MAY-13	0.65	01-MAY-13	0.5	01-MAY-13	81	01-MAY-13	53	01-MAY-13	95	01-MAY-13	2.8	01-MAY-13	1.07		1	-0.693147	0.0676586	0.0676586	1	-0.430783	20.5378	20.5378	19.8955	20	1	0	1	0	1	1	6	0	0	0	0	0	0	0	0	0
1240124	04-JUN-13	23-JUN-13	3.9	22-JUN-13	52	22-JUN-13	136	23-JUN-13	0.68	23-JUN-13	9.3	22-JUN-13	49	22-JUN-13	21	22-JUN-13	54	22-JUN-13	3	22-JUN-13	1.80	Y	2.23001	2.23001	0.587787	0.587787	1	-0.385662	31.0127	31.0127	31.3092	31	2	1	0	0	0	2	28	1	0	0			1	1	1	0	1
1544533	06-JAN-15	10-JAN-15	5.8	16-MAY-16	237	16-MAY-16	139	23-JUN-16	1.06	23-JUN-16	0.9	23-JUN-16	31	23-JUN-16	18	23-JUN-16	78	23-JUN-16	3.6	08-SEP-15	1.17		1	-0.105361	0.157004	0.157004	0.0582689	0.0582689	12.5261	12.5261	10.7128	11	1	0	0	1	0	3	10	1	0	0	0	0	0	0	0	0
1419694	23-APR-13	25-APR-13	7.9	23-MAY-16	228	23-MAY-16	134	23-MAY-16	0.89	23-MAY-16	0.7	2015-08-21	40	21-AUG-15	23	21-AUG-15	80	21-AUG-15	3.5	21-AUG-15	1.08	Y	1	-0.356675	0.076961	0.076961	1	-0.116534	20.642	20.642	22.5584	23	1	1	0	1	1	4	10	0	1	0	0	0	1	0	0	0
1802356	18-NOV-13	26-NOV-13	6	18-AUG-16	131	18-AUG-16	139	18-AUG-16	0.94	18-AUG-16	1.4	18-AUG-16	33	18-AUG-16	38	18-AUG-16	100	18-AUG-16	4	09-AUG-15	1.24	Y	0.336472	0.336472	0.215111	0.215111	1	-0.0618754	19.6811	19.6811	18.3401	18	1	1	0	0	0	3	18	1	0	0	0	0	0	0	0	0
0924544	18-APR-13	19-APR-13	1.5	16-APR-13	20	16-APR-13	143	16-APR-13	4.1	16-APR-13	2.6	16-APR-13	64	16-APR-13	28	16-APR-13	51	16-APR-13	3.5	16-APR-13	1.59	Y	0.955511	0.955511	0.463734	0.463734	1.41099	1.41099	28.7388	28.7388	26.5091	27	1	0	0	0	1	4	49	3	0	0	1	0	1	1	1	0	1
0727122	28-DEC-13	17-JAN-14	9.6	16-JAN-14	31	16-JAN-14	134	16-JAN-14	0.34	16-JAN-14	8.2	15-JAN-14	59	15-JAN-14	53	15-JAN-14	132	15-JAN-14	1.4	15-JAN-14	2.23	Y	2.10413	2.10413	0.802002	0.802002	1	-1.07881	32.936	32.936	33.6354	34	2	0	0	0	0	5	31	1	2	0	0	0	1	0	1	0
0190757	24-MAY-14	09-JUN-14	6.2	24-JUN-14	81	24-JUN-14	137	24-JUN-14	4.59	24-JUN-14	3.6	24-JUN-14	31	24-JUN-14	19	24-JUN-14	85	24-JUN-14	1.9	24-JUN-14	1.34	Y	1.28093	1.28093	0.29267	0.29267	1.52388	1.52388	29.1334	29.1334	29.1334	29	2	0	0	0		2	23	1	0	0	1	0	1		1	0
7032664	05-NOV-14	08-NOV-14	20.7	08-NOV-14	50	09-NOV-14	138	07-NOV-14	1.16	07-NOV-14	19.1	06-NOV-14	101	05-NOV-14	32	05-NOV-14	206	05-NOV-14	1.5	05-NOV-14	1.44	Y	2.94969	2.94969	0.364643	0.364643	0.14842	0.14842	23.0842	23.0842	22.526	23	1	0	0	0	0	1	3	0	0	0	1	0	0	1	1	0	1
8070183	05-NOV-14	20-NOV-14	15.4	20-NOV-14	179	20-NOV-14	134	13-NOV-14	3.14	13-NOV-14	2.3	13-NOV-14	27	13-NOV-14	16	13-NOV-14	71	13-NOV-14	3.1	13-NOV-14	1.51	Y	0.832909	0.832909	0.41211	0.41211	1.14422	1.14422	25.1442	25.1442	26.615	27	1	0	0	0	1	3	26	0	2	0	1	0	0	0	1	0
1121726	07-OCT-14	24-OCT-14	5.1	19-MAY-15	136	19-MAY-15	135	19-MAY-15	0.71	19-MAY-15	1.4	15-MAY-15	82	15-MAY-15	46	15-MAY-15	85	15-MAY-15	2.5	15-MAY-15	1.47	Y	0.336472	0.336472	0.385262	0.385262	1	-0.34249	21.5868	21.5868	22.8021	23	1	0	0	0	1	9	48	3	2	0	0	0	1	1	1	0	1
0527348	21-MAY-15	23-MAY-15	6.2	22-JUL-15	149	22-JUL-15	132	22-JUL-15	1.16	22-JUL-15	1.4	22-JUL-15	146	22-JUL-15	46	22-JUL-15	169	22-JUL-15	3	22-JUL-15	1.11	Y	0.336472	0.336472	0.10436	0.10436	0.14842	0.14842	10.2911	10.2911	15.193	15	1	0	1	0	1	4	37	0	2	0	0	0	1	1	1	0
1414874	18-NOV-15	20-NOV-15	6.4	02-JUN-16	59	2017-03-01	136	02-JUN-16	1.91	02-JUN-16	4.7	2017-03-01	159	02-JUN-16	74	02-JUN-16	139	02-JUN-16	2.3	19-NOV-15	1.21	Y	1.54756	1.54756	0.19062	0.19062	0.647103	0.647103	20.6075	20.6075	21.2475	21	1	1	0	0	1	14	105	3	3	0	0	1	1	1	1	0
0713551	09-SEP-15	17-SEP-15	8.2	11-APR-16	160	11-APR-16	134	11-APR-16	0.8	11-APR-16	1.3	29-MAR-16	25	29-MAR-16	16	29-MAR-16	84	29-MAR-16	2.5	19-DEC-15	1.16	Y	0.262364	0.262364	0.14842	0.14842	1	-0.223144	18.654	18.654	20.7673	21	1	0	1	0	1	9	75	1	5	0	0	0	1	1	1	0	0
8006671	05-MAR-13	21-MAR-13	6.3	11-MAY-13	91	11-MAY-13	134	11-MAY-13	2.96	11-MAY-13	1	30-APR-13	17	30-APR-13	8	30-APR-13	235	30-APR-13	1.9	02-MAY-13	1.35	Y	0	0	0.300105	0.300105	1.08519	1.08519	20.1764	20.1764	22.139	22	4	1	1	0	0	3	27	0	2	0	0	0	1	0	1	0	0
1556250	08-AUG-13	10-AUG-13	5	10-AUG-13	160	10-AUG-13	137	10-AUG-13	1.06	10-AUG-13	1.9	09-AUG-13	100	09-AUG-13	125	09-AUG-13	320	09-AUG-13	2.6	09-AUG-13	1.04		0.641854	0.641854	0.0392207	0.0392207	0.0582689	0.0582689	9.85311	9.85311	9.85311	10	1	1	0	0	0	1	2	0	0	1	0	0	0	0	0	0
1835959	02-JUL-13	04-JUL-13	5.9	22-FEB-14	89	22-FEB-14	135	22-FEB-14	0.75	22-FEB-14	1.5	2013-07-03	60	03-JUL-13	42	03-JUL-13	57	03-JUL-13	3.1	03-JUL-13	1.27		0.405465	0.405465	0.239017	0.239017	1	-0.287682	20.2096	20.2096	21.5158	22	1	0	0	0	1	1	2	0	0	0	0	0	1	1	1	0	0
1273674	15-APR-14	21-APR-14	3.9	20-AUG-14	138	20-AUG-14	138	20-AUG-14	0.6	20-AUG-14	0.5	20-AUG-14	41	20-AUG-14	28	20-AUG-14	91	20-AUG-14	2.8	20-AUG-14	1.02	Y	1	-0.693147	0.0198026	0.0198026	1	-0.510826	20.0018	20.0018	19.3418	19	1	0	0	0	1	1	6	0	0	0	0	0	1		1	0
1473769	17-MAR-14	26-MAR-14	7.6	20-MAR-14	128	20-MAR-14	130	20-MAR-14	0.53	20-MAR-14	1.7	18-MAR-14	140	17-MAR-14	30	17-MAR-14	173	17-MAR-14	2.5	17-MAR-14	1.34	Y	0.530628	0.530628	0.29267	0.29267	1	-0.634878	21.2837	21.2837	25.6071	26	2	0	0	0	1	2	15	0	0	0	0	0	0	0	1	0
1469809	22-FEB-13	27-FEB-13	8.2	06-JUN-16	185	06-JUN-16	140	06-JUN-16	1.34	06-JUN-16	0.8	06-JUN-16	32	06-JUN-16	25	06-JUN-16	61	06-JUN-16	4.1	12-NOV-15	1.14	Y	1	-0.223144	0.131028	0.131028	0.29267	0.29267	14.4784	14.4784	11.9517	12	1	0	1	0	0	2	6	1	0	0	0	0	0	0	0	0
7004541	12-AUG-14	19-AUG-14	10.4	19-AUG-14	218	19-AUG-14	136	19-AUG-14	0.65	19-AUG-14	1.8	12-AUG-14	54	12-AUG-14	36	12-AUG-14	135	12-AUG-14	2.3	12-AUG-14	1.22		0.587787	0.587787	0.198851	0.198851	1	-0.430783	20.449	20.449	21.0941	21	1	0	0	0	1	2	12	1	0	0	0	0	1	1	1	0	1
1704363	21-OCT-11	22-OCT-11	4.7	28-NOV-14	46	28-NOV-14	134	28-NOV-14	1.92	28-NOV-14	4.9	01-DEC-14	133	01-DEC-14	71	01-DEC-14	97	01-DEC-14	2.3	01-DEC-14	1.55	Y	1.58924	1.58924	0.438255	0.438255	0.652325	0.652325	23.5885	23.5885	25.2133	25	1	0	0	0	1	1	4	0	0	0	0	0	1	0	1	1
8226322	18-DEC-14	28-DEC-14	3.5	11-DEC-15	120	11-DEC-15	136	11-DEC-15	0.63	11-DEC-15	0.9	20-APR-16	72	20-APR-16	28	20-APR-16	142	20-APR-16	3.8	11-DEC-15	1.03	Y	1	-0.105361	0.0295588	0.0295588	1	-0.462035	20.1111	20.1111	20.7674	21	1	0	0	1	1	8	61	1	5	0	0	0	1	1	1	0	1
1868444	16-SEP-14	21-SEP-14	2.4	20-NOV-15	85	20-NOV-15	141	13-OCT-15	0.56	13-OCT-15	2.7	13-OCT-15	50	13-OCT-15	37	13-OCT-15	77	13-OCT-15	3.6	13-OCT-15	1.30	Y	0.993252	0.993252	0.262364	0.262364	1	-0.579818	22.693	22.693	20.4084	20	4	0	0	0	0	2	8	0	0	0	0	0	1	1	1	0	1
1941431	03-JUN-15	06-JUN-15	5	06-JAN-16	51	06-JAN-16	137	06-JAN-16	1.27	06-JAN-16	5.8	06-JAN-16	105	06-JAN-16	33	06-JAN-16	50	06-JAN-16	2	26-DEC-15	1.82	Y	1.75786	1.75786	0.598837	0.598837	0.239017	0.239017	22.0691	22.0691	22.0691	22	2	1	0	0	1	7	35	4	0	1	1	0	1	1	1	0
2235840	16-MAY-13	22-MAY-13	3.5	22-MAY-13	75	22-MAY-13	130	22-MAY-13	0.99	22-MAY-13	11.5	22-MAY-13	112	22-MAY-13	79	22-MAY-13	170	22-MAY-13	2.4	22-MAY-13	2.07		2.44235	2.44235	0.727549	0.727549	1	-0.0100503	33.3806	33.3806	34.9097	35	2	0	0	0	1	1	6	0	0	0	0	0	1	0	1	0
1863767	05-APR-13	10-APR-13	8.9	04-OCT-13	263	04-OCT-13	134	04-OCT-13	0.64	04-OCT-13	0.6	03-OCT-13	40	03-OCT-13	12	03-OCT-13	68	03-OCT-13	2.8	03-OCT-13	1.85		1	-0.510826	0.615186	0.615186	1	-0.446287	26.6701	26.6701	27.9897	28	2	0	0	0	0	2	16	0	0	0	0	0	0		1	0	1
2066939	30-MAR-11	03-APR-11	6.7	21-MAR-16	142	21-MAR-16	131	21-MAR-16	1.44	21-MAR-16	0.8	21-MAR-16	73	21-MAR-16	50	21-MAR-16	75	21-MAR-16	3.2	24-JUL-14	0.97	Y	1	-0.223144	-0.0304592	-0.0304592	0.364643	0.364643	13.3585	13.3585	18.6335	19	2	1	0	0	1	3	14	0	0	0	0	0	0	1	1	1	1
0438041	29-OCT-13	07-NOV-13	6.8	20-OCT-14	122	20-OCT-14	133	20-OCT-14	0.7	20-OCT-14	4	20-OCT-14	102	20-OCT-14	55	20-OCT-14	111	20-OCT-14	2.5	20-OCT-14	1.34	Y	1.38629	1.38629	0.29267	0.29267	1	-0.356675	24.5181	24.5181	26.5617	27	2	0	0	0	1	3	18	0	1	0	0	0	1	1	1	1	1
1536999	24-SEP-14	27-SEP-14	2.5	15-NOV-14	19	15-NOV-14	129	15-NOV-14	0.89	15-NOV-14	17.7	15-NOV-14	93	15-NOV-14	49	15-NOV-14	97	15-NOV-14	2.8	15-NOV-14	1.85	Y	2.87356	2.87356	0.615186	0.615186	1	-0.116534	33.7522	33.7522	35.4016	35	1	1	0	1	1	6	20	2	1	0	0	0	1	1	1	0	0
8468964	08-AUG-15	14-AUG-15	3.3	01-MAR-16	43	2018-03-02	135	01-MAR-16	0.79	01-MAR-16	6.7	01-MAR-16	34	01-MAR-16	14	01-MAR-16	114	01-MAR-16	3.3	29-AUG-15	1.31	Y	1.90211	1.90211	0.270027	0.270027	1	-0.235722	26.2143	26.2143	27.1241	27	1	0	0	0	1	11	54	1	3	0	0	0	1	1	1	0	0
1655446	20-AUG-15	22-AUG-15	3.2	27-AUG-15	77	27-AUG-15	134	27-AUG-15	1.62	27-AUG-15	1.1	27-AUG-15	87	27-AUG-15	54	27-AUG-15	199	27-AUG-15	2.8	27-AUG-15	1.22	Y	0.0953102	0.0953102	0.198851	0.198851	0.482426	0.482426	13.6342	13.6342	16.2444	16	1	1	1	0	0	8	18	1	2	0	0	0	1	1	1	0	1
2218768	13-JAN-14	14-JAN-14	8.9	06-NOV-15	138	06-NOV-15	142	06-NOV-15	0.79	06-NOV-15	0.5	06-NOV-15	22	26-OCT-15	13	26-OCT-15	111	26-OCT-15	4	26-OCT-15	1.03		1	-0.693147	0.0295588	0.0295588	1	-0.235722	20.1111	20.1111	16.8294	17	1	0	0	0	1	2	2	0	0	0	0	0	0	0	1	0
0701952	08-NOV-15	20-NOV-15	5.4	22-JUN-16	76	22-JUN-16	130	22-JUN-16	1.14	22-JUN-16	2.2	11-APR-16	50	11-APR-16	28	11-APR-16	126	11-APR-16	2.6	20-NOV-15	1.23	Y	0.788457	0.788457	0.207014	0.207014	0.131028	0.131028	12.9829	12.9829	19.2238	19	1	1	1	0	1	13	43	3	1	0	0	0	1	1	1	1	0
0404532	23-OCT-13	26-OCT-13	13.2	29-DEC-15	198	29-DEC-15	130	29-DEC-15	195.5	29-DEC-15	0.8	29-DEC-15	30	29-DEC-15	26	29-DEC-15	111	29-DEC-15	2.7	29-DEC-15	1.04	Y	1	-0.223144	0.0392207	0.0392207	5.27556	5.27556	61.1364	40	40	40	2	1	1	0	1	3	8	0	0	0	0	0	1	1	0		1
0371051	18-APR-13	20-APR-13	7.6	17-OCT-13	23	17-OCT-13	139	17-OCT-13	3.18	17-OCT-13	21.1	17-OCT-13	258	17-OCT-13	65	17-OCT-13	54	17-OCT-13	3.7	17-OCT-13	>11.50	Y	3.04927	3.04927	#VALUE!	#VALUE!	1.15688	1.15688	#VALUE!	#VALUE!	#VALUE!	#VALUE!	3	0	1	1	1	2	7	0	0	0	1	0	1	1	1	1	1
0200415	24-OCT-13	02-NOV-13	6.7	05-DEC-13	37	05-DEC-13	135	05-DEC-13	2.28	05-DEC-13	7.7	04-DEC-13	53	04-DEC-13	16	04-DEC-13	35	04-DEC-13	2.6	04-DEC-13	2.54	Y	2.04122	2.04122	0.932164	0.932164	0.824175	0.824175	32.4734	32.4734	32.9702	33	1	0	0	0	1	2	25	1	0	0	1	0	1	1	1	0	1
1859827	02-APR-11	03-APR-11	5	28-JUL-16	106	28-JUL-16	131	28-JUL-16	0.91	28-JUL-16	1.8	28-JUL-16	34	28-JUL-16	23	28-JUL-16	60	28-JUL-16	3.5	23-SEP-15	1.36	Y	0.587787	0.587787	0.307485	0.307485	1	-0.0943107	21.6657	21.6657	25.2959	25	4	1	1	0	0	1	5	0	0	0	0	0	0	1	1	0	1
1465052	08-APR-15	11-APR-15	9.2	15-MAY-15	169	15-MAY-15	131	15-MAY-15	0.66	15-MAY-15	4.4	09-MAY-15	51	09-MAY-15	25	09-MAY-15	90	09-MAY-15	2.3	09-MAY-15	1.38		1.4816	1.4816	0.322083	0.322083	1	-0.415515	25.2078	25.2078	28.1367	28	0	1	0	0	0	2	9	1	0	0	1	0	1	0	1	0
7063673	19-AUG-15	30-AUG-15	4.7	27-MAY-16	79	27-MAY-16	138	27-MAY-16	1.07	27-MAY-16	1.2	30-AUG-15	48	30-AUG-15	25	30-AUG-15	119	30-AUG-15	2.5	30-AUG-15	0.98	Y	0.182322	0.182322	-0.0202027	-0.0202027	0.0676586	0.0676586	7.5404	7.5404	6.46923	6	4	1	0	0	0	7	44	1	1	0	0	0	1	1	0	1	1
1164277	18-MAR-14	20-MAR-14	4.7	02-JUN-16	139	02-JUN-16	134	05-AUG-16	0.71	05-AUG-16	3.4	2018-05-17	48	13-OCT-15	32	13-OCT-15	89	13-OCT-15	3.5	13-OCT-15	1.08	Y	1.22378	1.22378	0.076961	0.076961	1	-0.34249	21.4878	21.4878	23.3205	23	1	1	0	0	0	14	72	8	1	0	0	0	1	0	1	0
2023893	31-MAR-14	06-APR-14	6.9	11-AUG-16	214	11-AUG-16	136	11-AUG-16	1.51	11-AUG-16	0.7	11-AUG-16	18	11-AUG-16	16	11-AUG-16	79	11-AUG-16	3.7	09-DEC-15	0.99	Y	1	-0.356675	-0.0100503	-0.0100503	0.41211	0.41211	14.0413	14.0413	14.898	15	1	1	0	1	1		15	1	0	1	0	0	1	1	1	1
0333749	25-NOV-15	04-DEC-15	5.6	25-FEB-16	89	25-FEB-16	131	25-FEB-16	1.35	25-FEB-16	2	24-FEB-16	67	24-FEB-16	27	24-FEB-16	107	24-FEB-16	1.5	15-DEC-15	1.45	Y	0.693147	0.693147	0.371564	0.371564	0.300105	0.300105	16.0836	16.0836	20.8191	21	2	0	0	0	0	4	27	0	2	0	0	0	1	1	1
1036935	12-AUG-12	17-AUG-12	5.1	30-JUL-16	202	30-JUL-16	136	30-JUL-16	1.15	30-JUL-16	0.7	30-JUL-16	20	30-JUL-16	12	30-JUL-16	55	30-JUL-16	4	05-DEC-15	0.94	Y	1	-0.356675	-0.0618754	-0.0618754	0.139762	0.139762	10.8545	10.8545	11.8163	12	5	0	0	0	1	4	7	0	1	1	0	0	1	1	1	0	1
7052695	16-SEP-15	19-SEP-15	5.3	17-JUN-16	169	17-JUN-16	133	05-JUL-16	0.74	05-JUL-16	1.2	17-JUN-16	50	17-JUN-16	24	17-JUN-16	127	17-JUN-16	2.1	21-DEC-15	1.16		0.182322	0.182322	0.14842	0.14842	1	-0.301105	18.3515	18.3515	21.2091	21	4	0	1	0	1	5	19	4	0	0	0	0	1	1	1	1
1945835	20-AUG-13	21-AUG-13	3	09-SEP-13	49	09-SEP-13	143	09-SEP-13	3.15	09-SEP-13	2.5	09-SEP-13	42	09-SEP-13	20	09-SEP-13	89	09-SEP-13	2.9	09-SEP-13	1.48	Y	0.916291	0.916291	0.392042	0.392042	1.1474	1.1474	25.2651	25.2651	22.3476	22	1	1	0	0	0	6	45	4	1	0	0	0	1	1	1	0	1
0280226	07-AUG-14	12-AUG-14	2.5	07-OCT-14	53	07-OCT-14	135	07-OCT-14	0.72	07-OCT-14	3.6	07-OCT-14	138	07-OCT-14	67	07-OCT-14	75	07-OCT-14	2.2	07-OCT-14	1.40	Y	1.28093	1.28093	0.336472	0.336472	1	-0.328504	24.6104	24.6104	25.6261	26	2	1	0	0	1	1	5	0	0	0	0	0	1		1	0
2190701	04-SEP-14	15-SEP-14	5.8	19-MAR-15	140	19-MAR-15	136	19-MAR-15	0.88	19-MAR-15	1.3	19-MAR-15	69	19-MAR-15	51	19-MAR-15	148	19-MAR-15	3.3	19-MAR-15	1.05	Y	0.262364	0.262364	0.0487902	0.0487902	1	-0.127833	17.5382	17.5382	18.2794	18	1	0	0	0	1	1	11	0	0	0	0	0	1	1	1	0
8064005	04-AUG-15	11-AUG-15	8.1	06-AUG-15	206	06-AUG-15	141	08-AUG-15	0.56	08-AUG-15	1.1	04-AUG-15	30	04-AUG-15	14	04-AUG-15	104	04-AUG-15	2.6	04-AUG-15	1.02	Y	0.0953102	0.0953102	0.0198026	0.0198026	1	-0.579818	16.5821	16.5821	13.4909	13	1	1	1		1	3	13	0	2	0	1	0				0
0925737	04-MAR-13	08-MAR-13	5.7	18-DEC-15	107	18-DEC-15	146	20-DEC-15	0.72	20-DEC-15	1.8	18-DEC-15	49	18-DEC-15	24	18-DEC-15	88	18-DEC-15	2.6	18-DEC-15	1.40	Y	0.587787	0.587787	0.336472	0.336472	1	-0.328504	21.9903	21.9903	16.6414	17	1	0	0	1	1	8	70	3	1	0	0	0	1	1	1	0	1
0144454	12-JAN-10	16-JAN-10	4.4	09-DEC-15	89	09-DEC-15	132	09-DEC-15	1.38	09-DEC-15	2.8	01-DEC-15	61	30-NOV-15	37	30-NOV-15	85	30-NOV-15	2.2	30-NOV-15	1.57	Y	1.02962	1.02962	0.451076	0.451076	0.322083	0.322083	18.4563	18.4563	22.0111	22	1	0	0	0	1	3	24	0	1	0	0	0	1	1	1	0	0
0351412	11-AUG-13	12-AUG-13	5	18-AUG-13	77	18-AUG-13	135	18-AUG-13	1.03	18-AUG-13	1.6	18-AUG-13	46	18-AUG-13	31	18-AUG-13	125	18-AUG-13	2	18-AUG-13	1.25		0.470004	0.470004	0.223144	0.223144	0.0295588	0.0295588	10.9887	10.9887	12.9034	13	4	0	0	0	0	3	8	1	0	0	0	0	0	0	1	1
2077454	20-SEP-13	26-SEP-13	11.8	13-APR-14	55	13-APR-14	133	13-APR-14	0.58	13-APR-14	0.7	08-APR-14	48	08-APR-14	32	08-APR-14	132	08-APR-14	1.8	13-APR-14	1.31	Y	1	-0.356675	0.270027	0.270027	1	-0.544727	22.8043	22.8043	25.0741	25	2	0	1	0	0	3	20	1	0	0	1	0	1	0	1	0	1
0448341	09-DEC-14	15-DEC-14	2.9	12-DEC-14	82	12-DEC-14	137	12-DEC-14	0.81	12-DEC-14	4.7	09-DEC-14	121	09-DEC-14	102	09-DEC-14	156	09-DEC-14	3.5	09-DEC-14	1.39	Y	1.54756	1.54756	0.329304	0.329304	1	-0.210721	25.538	25.538	25.538	26	2	1	0	0	1	6	45	2	1	0	0	0	1	1	1	0	1
7058121	21-MAR-15	24-MAR-15	26.3	23-MAR-15	123	23-MAR-15	131	23-MAR-15	9.76	23-MAR-15	41	24-MAR-15	55	24-MAR-15	34	24-MAR-15	85	24-MAR-15	4.4	24-MAR-15	1.94		3.71357	3.71357	0.662688	0.662688	2.27829	2.27829	49.6927	40	40	40	2	0	0	0		1	3	0	0	0	0	0	0		1	0
0815491	05-FEB-13	16-FEB-13	6.6	01-MAR-13	68	01-MAR-13	138	01-MAR-13	0.86	01-MAR-13	2.4	27-FEB-13	59	27-FEB-13	27	27-FEB-13	117	27-FEB-13	1.7	27-FEB-13	1.34	Y	0.875469	0.875469	0.29267	0.29267	1	-0.150823	22.5872	22.5872	22.0125	22	2	1	0	0	0	2	14	1	0	0	0	0	1	1	1	0	1
0379763	14-SEP-14	19-SEP-14	9.5	17-FEB-16	45	17-FEB-16	128	17-FEB-16	0.76	17-FEB-16	3.5	17-FEB-16	89	17-FEB-16	50	17-FEB-16	100	17-FEB-16	2.3	22-NOV-14	1.39	Y	1.25276	1.25276	0.329304	0.329304	1	-0.274437	24.4236	24.4236	29.0498	29	1	0	1	0		9	46	1	4	0	0	0	1	0	0	0
1952323	21-FEB-14	25-FEB-14	6.6	14-DEC-14	139	14-DEC-14	133	14-DEC-14	0.46	14-DEC-14	0.7	14-DEC-14	59	14-DEC-14	27	14-DEC-14	149	14-DEC-14	2.7	14-DEC-14	1.15	Y	1	-0.356675	0.139762	0.139762	1	-0.776529	21.3453	21.3453	23.8077	24	3	1	0	0	1	9	51	4	3	0	0	0	1	1	1	0	1
1422380	26-JAN-09	06-FEB-09	2.7	30-JUL-16	207	30-JUL-16	136	30-JUL-16	1.3	30-JUL-16	1.4	30-JUL-16	19	30-JUL-16	17	30-JUL-16	68	30-JUL-16	4.3	07-NOV-15	1.12	Y	0.336472	0.336472	0.113329	0.113329	0.262364	0.262364	11.482	11.482	12.4231	12	1	1	0	0	1	1	2	0	0	1	0	0	0	0	0	1
0959220	22-OCT-15	01-NOV-15	19.8	10-DEC-15	178	10-DEC-15	132	09-DEC-15	1.36	09-DEC-15	2.4	10-DEC-15	40	10-DEC-15	20	10-DEC-15	104	10-DEC-15	3	10-DEC-15	1.25	Y	0.875469	0.875469	0.223144	0.223144	0.307485	0.307485	15.1811	15.1811	19.2762	19	1	0	0	0	1	2	12	0	1	0	1	0	1		1	0
1407689	17-JUN-13	05-JUL-13	16.5	25-JUN-13	96	25-JUN-13	137	25-JUN-13	3.33	25-JUN-13	26.8	17-JUN-13	144	17-JUN-13	51	17-JUN-13	139	17-JUN-13	2.6	25-JUN-13	1.93	Y	3.2884	3.2884	0.65752	0.65752	1.20297	1.20297	37.7368	37.7368	37.7368	38	1	0	0	0	0	2	42	1	0	0	1	0	1		1	0
1446274	21-OCT-13	24-OCT-13	4.8	31-DEC-13	12	31-DEC-13	131	30-DEC-13	0.45	30-DEC-13	22.8	29-DEC-13	50	29-DEC-13	18	29-DEC-13	70	29-DEC-13	1.7	29-DEC-13	2.26	Y	3.12676	3.12676	0.815365	0.815365	1	-0.798508	36.9512	36.9512	37.5549	38	3	0	0	1	1	3	24	0	2	0	1	0	1	1	1	0	0
8255133	10-MAR-13	21-MAR-13	11.5	07-SEP-14	224	07-SEP-14	136	07-SEP-14	1.41	07-SEP-14	0.7	05-SEP-14	52	05-SEP-14	28	05-SEP-14	120	05-SEP-14	2.3	05-SEP-14	1.09	Y	1	-0.356675	0.0861777	0.0861777	0.34359	0.34359	14.4633	14.4633	15.3061	15	1	1	1	0	1	2	22	0	0	0	0	0	1	1	1	0	1
2297317	08-JAN-15	29-JAN-15	7	27-JAN-15	36	27-JAN-15	138	27-JAN-15	2.93	27-JAN-15	10.2	27-JAN-15	124	27-JAN-15	37	27-JAN-15	49	27-JAN-15	4	27-JAN-15	2.89	Y	2.32239	2.32239	1.06126	1.06126	1.075	1.075	37.3825	37.3825	37.2961	37	2	0	1	0	0	3	40	0	0	0	1	0	1	1	1		1
0838662	15-JAN-14	19-JAN-14	6	19-JUN-16	145	19-JUN-16	135	19-JUN-16	1.15	19-JUN-16	5.3	19-JUN-16	120	19-JUN-16	59	19-JUN-16	554	19-JUN-16	3.2	11-JUL-15	1.09	Y	1.66771	1.66771	0.0861777	0.0861777	0.139762	0.139762	15.0366	15.0366	16.6842	17	3	0	0	1	1	5	18	1	0	0	0	0	0	0	0	0
0573306	22-JUL-14	29-JUL-14	4.7	07-AUG-16	79	07-AUG-16	135	07-AUG-16	1.01	07-AUG-16	2.4	04-AUG-16	67	04-AUG-16	28	04-AUG-16	157	04-AUG-16	2.9	21-DEC-15	1.07	Y	0.875469	0.875469	0.0676586	0.0676586	0.00995033	0.00995033	10.5923	10.5923	12.5332	13	3	0	0	0	1	16	73	3	6	0	0	1	1	0	0	0	0
1067675	17-MAR-15	27-MAR-15	4.4	06-JUN-16	295	06-JUN-16	137	04-AUG-16	2.59	04-AUG-16	0.4	04-AUG-16	27	04-AUG-16	17	04-AUG-16	93	04-AUG-16	2.1	30-NOV-15	2.88	Y	1	-0.916291	1.05779	1.05779	0.951658	0.951658	31.1646	31.1646	31.1646	31	1	1	1	0	0	6	75	2	3	0	1	0	0	0	1	0
0536700	08-JAN-15	09-JAN-15	4.4	22-JUL-16	69	22-JUL-16	134	22-JUL-16	1.1	22-JUL-16	1.4	22-JUL-16	44	22-JUL-16	30	22-JUL-16	211	22-JUL-16	2.5	08-JUL-15	1.11		0.336472	0.336472	0.10436	0.10436	0.0953102	0.0953102	9.78282	9.78282	12.7743	13	4	1	0		1	12	34	3	1	0	0	0	1	1	1	0	1
1421189	26-OCT-10	29-OCT-10	6.4	02-FEB-11	66	2017-05-26	138	29-OCT-10	0.56	29-OCT-10	0.8	02-FEB-11	24	02-FEB-11	15	02-FEB-11	71	02-FEB-11	3.2	02-FEB-11	1.11	Y	1	-0.223144	0.10436	0.10436	1	-0.579818	20.9488	20.9488	20.3201	20	4	1	0	0	0	1	1	0	0	0	0	0	0	1	0	0	1
1278729	14-JUL-13	18-JUL-13	5.3	24-JUL-13	82	24-JUL-13	128	24-JUL-13	1.36	24-JUL-13	4.9	24-JUL-13	55	24-JUL-13	38	24-JUL-13	86	24-JUL-13	1.7	24-JUL-13	1.50	Y	1.58924	1.58924	0.405465	0.405465	0.307485	0.307485	19.9211	19.9211	25.8846	26	2	0	0	0	1	1	4	0	0	0	0	0	1	1	1	0	1
0286822	22-JUL-13	28-JUL-13	9.5	07-AUG-13	363	07-AUG-13	141	07-AUG-13	3.63	07-AUG-13	0.5	07-AUG-13	101	07-AUG-13	51	07-AUG-13	157	07-AUG-13	3.1	07-AUG-13	1.30	Y	1	-0.693147	0.262364	0.262364	1.28923	1.28923	25.4864	25.4864	23.5706	24	1	0	1	1	1	1	6	0	0	0	0	0	1	0	1	0
1930252	10-OCT-13	18-OCT-13	11	18-OCT-13	316	18-OCT-13	131	18-OCT-13	1.2	18-OCT-13	0.6	11-OCT-13	35	11-OCT-13	35	11-OCT-13	65	11-OCT-13	2.9	11-OCT-13	1.11		1	-0.510826	0.10436	0.10436	0.182322	0.182322	13.1236	13.1236	18.4452	18	1	0	0	1	1	2	17	1	0	0	1	0	1		1	0
2270991	06-SEP-13	11-SEP-13	4.3	11-SEP-13	57	11-SEP-13	137	11-SEP-13	0.7	11-SEP-13	3.1	07-SEP-13	68	07-SEP-13	24	07-SEP-13	75	07-SEP-13	1.9	07-SEP-13	1.50		1.1314	1.1314	0.405465	0.405465	1	-0.356675	24.8179	24.8179	24.8179	25	0	1	0	0	1	1	5	0	0	0	0	0	0		1	0
1994836	19-MAR-15	24-MAR-15	4.3	23-MAR-15	122	23-MAR-15	135	23-MAR-15	1.67	23-MAR-15	0.6	23-MAR-15	61	23-MAR-15	36	23-MAR-15	85	23-MAR-15	209	01-APR-15	1.22	Y	1	-0.510826	0.198851	0.198851	0.512824	0.512824	17.3449	17.3449	18.8401	19	2	0	0	0	1	2	9	0	1	0	0	0	0		1
2069676	28-OCT-14	06-NOV-14	4.1	24-NOV-14	118	24-NOV-14	140	24-NOV-14	1.31	24-NOV-14	0.5	23-NOV-14	22	23-NOV-14	11	23-NOV-14	118	23-NOV-14	2	23-NOV-14	1.14	Y	1	-0.693147	0.131028	0.131028	0.270027	0.270027	14.2617	14.2617	11.7136	12	5	1	0	1	1	6	51	3	0	0	0	0	1	1	1	0
1053229	30-APR-15	03-MAY-15	7.3	03-MAY-15	116	03-MAY-15	131	03-MAY-15	0.71	03-MAY-15	1.7	03-MAY-15	68	03-MAY-15	39	03-MAY-15	103	03-MAY-15	2.3	03-MAY-15	1.36	Y	0.530628	0.530628	0.307485	0.307485	1	-0.34249	21.4496	21.4496	25.1226	25	2	0	0	0	1	3	10	1	0	0	1	0	1	1	1	0
1721508	03-JUL-15	16-JUL-15	7.8	15-JUL-15	200	15-JUL-15	141	15-JUL-15	0.82	15-JUL-15	0.6	15-JUL-15	18	15-JUL-15	9	15-JUL-15	95	15-JUL-15	1.7	15-JUL-15	1.11		1	-0.510826	0.10436	0.10436	1	-0.198451	20.9488	20.9488	18.4341	18	1	0	1	0	1	5	29	3	1	0	1	0	0	0	1	0
0828236	04-FEB-13	09-FEB-13	6.7	08-FEB-13	80	08-FEB-13	137	09-FEB-13	1.79	09-FEB-13	1.2	08-FEB-13	62	08-FEB-13	27	08-FEB-13	238	08-FEB-13	1.5	08-FEB-13	2.18	Y	0.182322	0.182322	0.779325	0.779325	0.582216	0.582216	21.4194	21.4194	21.4194	21	2	1	1	0	0	4	17	3	0	0	0	0	1	1	1	0	1
1404207	22-NOV-13	03-DEC-13	7.4	02-DEC-13	119	02-DEC-13	133	06-FEB-14	3.85	06-FEB-14	3.1	06-FEB-14	35	06-FEB-14	19	06-FEB-14	175	06-FEB-14	2.2	06-FEB-14	1.59	Y	1.1314	1.1314	0.463734	0.463734	1.34807	1.34807	28.8016	28.8016	30.2798	30	1	0	0	0	0	1	11	0	0	0	1	0	1	0	1	0
0695250	12-MAY-13	17-MAY-13	14.7	13-DEC-13	54	13-DEC-13	147	13-DEC-13	1.02	13-DEC-13	0.6	11-DEC-13	40	11-DEC-13	24	11-DEC-13	283	11-DEC-13	2.3	11-DEC-13	1.96		1	-0.510826	0.672944	0.672944	0.0198026	0.0198026	17.9365	17.9365	10.6555	11	2	1	0	0	0	2	8	0	0	0	1	0	1	1	1	1
0182866	17-DEC-13	19-DEC-13	8.2	18-DEC-13	51	18-DEC-13	133	18-DEC-13	1.11	18-DEC-13	6.1	18-DEC-13	80	18-DEC-13	46	18-DEC-13	100	18-DEC-13	1.4	18-DEC-13	1.74		1.80829	1.80829	0.553885	0.553885	0.10436	0.10436	20.4676	20.4676	23.0459	23	2	0	0	0	0	2	4	0	0	0	0	0	1	1	1	0
0277189	07-SEP-14	19-SEP-14	42.8	21-SEP-14	77	21-SEP-14	136	21-SEP-14	4.09	21-SEP-14	2.7	21-SEP-14	1419	21-SEP-14	385	21-SEP-14	142	21-SEP-14	3.6	21-SEP-14	1.68	Y	0.993252	0.993252	0.518794	0.518794	1.40854	1.40854	29.4748	29.4748	29.8221	30	1	0	0	0	1	13	86	6	6	0	1	0	1		1	0
0399482	19-FEB-15	10-MAR-15	14.3	06-MAR-15	140	06-MAR-15	129	08-MAR-15	3.19	08-MAR-15	4.3	25-FEB-15	30	25-FEB-15	36	25-FEB-15	121	25-FEB-15	2.9	25-FEB-15	1.12		1.45862	1.45862	0.113329	0.113329	1.16002	1.16002	24.3142	24.3142	28.4553	28	3	1	1	0	1	2	29	0	0	0	1	0	1			0
0310135	31-MAY-15	03-JUN-15	9.2	21-OCT-15	95	21-OCT-15	130	21-OCT-15	0.93	21-OCT-15	14.4	21-OCT-15	100	21-OCT-15	47	21-OCT-15	70	21-OCT-15	2	21-OCT-15	2.68	Y	2.66723	2.66723	0.985817	0.985817	1	-0.0725707	37.1233	37.1233	37.7878	38	1	0	0	1	1	8	37	3	3	0	0	0	1	1	1	1
0386718	30-AUG-15	04-SEP-15	6.4	20-AUG-16	129	20-AUG-16	137	20-AUG-16	2.09	20-AUG-16	0.6	20-AUG-16	31	20-AUG-16	22	20-AUG-16	37	20-AUG-16	3.3	20-NOV-15	1.71	Y	1	-0.510826	0.536493	0.536493	0.737164	0.737164	23.2734	23.2734	23.2734	23	3	0	1	0	1	16	124	7	3	0	0	0	1	0	1	0
8074704	10-APR-14	16-APR-14	13.5	12-FEB-16	18	12-FEB-16	136	12-FEB-16	3.25	12-FEB-16	6.6	12-FEB-16	116	12-FEB-16	142	12-FEB-16	47	12-FEB-16	2.4	30-DEC-15	1.23	Y	1.88707	1.88707	0.207014	0.207014	1.17865	1.17865	27.1614	27.1614	27.5851	28	1	1	1	1	1	9	46	3	3	0	1	0	0	0	1	0
0848545	19-MAY-11	22-MAY-11	3.2	25-NOV-13	50	25-NOV-13	136	25-NOV-13	0.95	25-NOV-13	31.4	25-NOV-13	96	25-NOV-13	43	25-NOV-13	66	25-NOV-13	1.6	25-NOV-13	2.26	Y	3.44681	3.44681	0.815365	0.815365	1	-0.0512933	38.161	38.161	38.2217	38	1	1	0	0		1	20	0	0	0			1	1	1	0	1
2271549	06-JAN-14	08-JAN-14	3	08-JAN-14	55	08-JAN-14	131	08-JAN-14	0.58	08-JAN-14	0.7	08-JAN-14	39	08-JAN-14	23	08-JAN-14	87	08-JAN-14	2.4	08-JAN-14	1.36	Y	1	-0.356675	0.307485	0.307485	1	-0.544727	23.2238	23.2238	26.5455	27	1	0	0	0	1	4	40	2	1	0	0	0	1	1	1	0
1783076	08-SEP-14	16-SEP-14	4.5	16-SEP-14	76	16-SEP-14	131	16-SEP-14	0.55	16-SEP-14	2.6	16-SEP-14	67	16-SEP-14	51	16-SEP-14	86	16-SEP-14	2.3	16-SEP-14	1.31	Y	0.955511	0.955511	0.270027	0.270027	1	-0.597837	22.6361	22.6361	26.0742	26	1	0	0	0	1	1	8	0	0	0	0	0	1	1	1	0
2224590	15-OCT-14	22-OCT-14	6.4	20-OCT-14	117	20-OCT-14	130	22-OCT-14	1.04	22-OCT-14	4.1	15-OCT-14	74	15-OCT-14	25	15-OCT-14	70	15-OCT-14	1.9	15-OCT-14	1.36	Y	1.41099	1.41099	0.307485	0.307485	0.0392207	0.0392207	15.5827	15.5827	21.2231	21	1	0	0	0	1	3	53	0	1	0	1	0	1		1	0
0409493	14-JAN-11	16-JAN-11	3.2	27-NOV-14	30	27-NOV-14	139	27-NOV-14	4.58	27-NOV-14	42	27-NOV-14	125	27-NOV-14	60	27-NOV-14	82	27-NOV-14	2.9	27-NOV-14	2.86	Y	3.73767	3.73767	1.05082	1.05082	1.5217	1.5217	46.8903	40	40	40	1	0	0	0	1	6	28	2	3	0	1	0	1	1	1	0	1
7129589	21-DEC-15	24-DEC-15	6.7	24-DEC-15	80	27-DEC-15	132	24-DEC-15	0.5	24-DEC-15	3.8	24-DEC-15	30	24-DEC-15	38	24-DEC-15	134	24-DEC-15	2.4	24-DEC-15	1.61	Y	1.335	1.335	0.476234	0.476234	1	-0.693147	26.3801	26.3801	28.6274	29	2	1	0	0	0	1	3	0	0	0	0	0	1	1	0	0
8197741	08-JAN-13	14-JAN-13	6.8	28-FEB-14	140	28-FEB-14	131	28-FEB-14	0.8	28-FEB-14	0.8	28-FEB-14	19	28-FEB-14	15	28-FEB-14	35	28-FEB-14	3.9	28-FEB-14	2.20	Y	1	-0.223144	0.788457	0.788457	1	-0.223144	28.6107	28.6107	30.8658	31	1	1	1	0	1	1	6	0	0	0	0	0	1	1	1	0
2040435	27-FEB-13	11-MAR-13	2.3	09-MAR-13	96	09-MAR-13	130	09-MAR-13	1.02	09-MAR-13	1.9	07-MAR-13	32	07-MAR-13	15	07-MAR-13	80	07-MAR-13	2	08-MAR-13	1.20	Y	0.641854	0.641854	0.182322	0.182322	0.0198026	0.0198026	11.0877	11.0877	17.7665	18	1	0	0	0	1	1	12	0	0	0	1	0	1	0	1	0
0889515	16-MAY-09	23-MAY-09	5.7	12-JUN-13	71	12-JUN-13	136	12-JUN-13	0.57	12-JUN-13	4.1	12-JUN-13	83	12-JUN-13	32	12-JUN-13	187	12-JUN-13	2.2	12-JUN-13	1.76	Y	1.41099	1.41099	0.565314	0.565314	1	-0.562119	27.665	27.665	28.0721	28	2	0	1	0	0	1	30	0	0	0	0	1	1		0	0
8064242	24-FEB-12	29-FEB-12	9.5	04-OCT-13	608	04-OCT-13	136	04-OCT-13	1.27	04-OCT-13	2.7	04-OCT-13	142	04-OCT-13	165	04-OCT-13	410	04-OCT-13	2.6	04-OCT-13	1.33	Y	0.993252	0.993252	0.285179	0.285179	0.239017	0.239017	15.6659	15.6659	16.4689	16	1	1	0			1	2	0	0	0	0	1	0	0	0	1
2297960	08-MAY-14	17-MAY-14	5.8	23-MAY-14	155	23-MAY-14	135	23-MAY-14	0.68	23-MAY-14	4.7	24-MAY-14	39	23-MAY-14	22	23-MAY-14	71	23-MAY-14	3	23-MAY-14	1.64	Y	1.54756	1.54756	0.494696	0.494696	1	-0.385662	27.3904	27.3904	28.2226	28	1	0	0	0	0	3	20	1	1	0	0	0	1	1	1	0	0
2307924	23-JUN-14	24-JUN-14	6.9	23-JUN-14	79	23-JUN-14	134	24-JUN-14	1.21	24-JUN-14	7.1	23-JUN-14	90	23-JUN-14	77	23-JUN-14	104	23-JUN-14	2.9	23-JUN-14	1.60		1.96009	1.96009	0.470004	0.470004	0.19062	0.19062	20.9274	20.9274	22.8156	23	1	0	0	0	1	1	1	0	0	0	0	0	1		1	0
1604339	27-MAR-13	30-MAR-13	3.9	24-MAY-15	21	24-MAY-15	143	25-MAY-15	2.43	25-MAY-15	34	24-MAY-15	60	24-MAY-15	34	24-MAY-15	47	24-MAY-15	2.6	24-MAY-15	1.62	Y	3.52636	3.52636	0.482426	0.482426	0.887891	0.887891	33.6599	33.6599	32.4046	32	1	0	1	1	0	5	67	0	1	0	1	0	0		1	0
0869781	08-DEC-15	11-DEC-15	4	16-AUG-16	112	16-AUG-16	139	15-AUG-16	0.97	15-AUG-16	0.6	15-AUG-16	22	15-AUG-16	21	15-AUG-16	106	15-AUG-16	2.3	16-DEC-15	1.79	Y	1	-0.510826	0.582216	0.582216	1	-0.0304592	26.3008	26.3008	25.3967	25	1	1	0		1	13	60	4	4	1	0	0	1	1	1	0	1
1094888	07-AUG-08	11-AUG-08	3.7	23-JAN-09	90	23-JAN-09	140	23-JAN-09	0.85	23-JAN-09	1.7	23-JAN-09	38	23-JAN-09	27	23-JAN-09	197	23-JAN-09	2.9	23-JAN-09	1.32	Y	0.530628	0.530628	0.277632	0.277632	1	-0.162519	21.1153	21.1153	19.2457	19	4	1	0	0	1	6	19	3	1	0	0	0	1		0	0
8119318	06-FEB-14	09-FEB-14	5.1	22-MAY-14	27	22-MAY-14	135	22-MAY-14	1.01	22-MAY-14	2.7	22-MAY-14	161	21-MAY-14	41	21-MAY-14	109	21-MAY-14	2.3	21-MAY-14	1.31	Y	0.993252	0.993252	0.270027	0.270027	0.00995033	0.00995033	13.304	13.304	15.066	15	1	1	0	0	0	4	12	0	0	0	0	0	1	1	1	0	1
0176262	27-MAY-14	02-JUN-14	7.9	02-JUN-14	41	02-JUN-14	138	02-JUN-14	2.52	02-JUN-14	6	27-MAY-14	38	27-MAY-14	27	27-MAY-14	67	27-MAY-14	2.1	27-MAY-14	1.92	Y	1.79176	1.79176	0.652325	0.652325	0.924259	0.924259	29.3541	29.3541	29.0027	29	2	0	0	0	0	2	9	1	0	0	1	0	1	1	1	0	1
2089959	06-JUN-15	08-JUN-15	3.6	08-JUN-15	50	08-JUN-15	137	08-JUN-15	0.96	08-JUN-15	4.9	06-JUN-15	56	06-JUN-15	30	06-JUN-15	97	06-JUN-15	3.1	06-JUN-15	1.35		1.58924	1.58924	0.300105	0.300105	1	-0.040822	25.3685	25.3685	25.3685	25	0	0	0	0	1	1	2	0	0	0	0	0	1	1	1	0	1
8221950	28-JAN-14	01-FEB-14	10.5	02-AUG-16	210	02-AUG-16	137	02-AUG-16	0.76	02-AUG-16	0.6	02-AUG-16	26	02-AUG-16	15	02-AUG-16	129	02-AUG-16	3.6	08-DEC-15	0.96		1	-0.510826	-0.040822	-0.040822	1	-0.274437	19.3228	19.3228	19.3228	19	1	0	0	0	1	2	11	0	0	0	1	0	1	0	1	1
0532171	25-DEC-15	26-JAN-16	8.9	20-JAN-16	24	20-JAN-16	148	21-JAN-16	0.99	21-JAN-16	10.2	18-JAN-16	58	18-JAN-16	34	18-JAN-16	76	18-JAN-16	3.3	31-DEC-15	1.95	Y	2.32239	2.32239	0.667829	0.667829	1	-0.0100503	32.2583	32.2583	29.4481	29	2	0	1	0	1	8	129	5	1	0	0	0	1	1	1	0	0
2293343	05-FEB-14	09-FEB-14	5.1	31-MAR-14	180	31-MAR-14	132	31-MAR-14	0.84	31-MAR-14	1.3	31-MAR-14	52	31-MAR-14	28	31-MAR-14	285	31-MAR-14	2.9	31-MAR-14	1.23		0.262364	0.262364	0.207014	0.207014	1	-0.174353	19.3103	19.3103	22.7241	23	2	0	0	0	0	1	4	0	0	0	0	0	1	0	1	1
1792829	24-JAN-14	27-JAN-14	33.4	13-FEB-14	13	13-FEB-14	135	13-FEB-14	2.47	13-FEB-14	21.6	13-FEB-14	73	13-FEB-14	29	13-FEB-14	144	13-FEB-14	3.9	13-FEB-14	2.63	Y	3.07269	3.07269	0.966984	0.966984	0.904218	0.904218	37.5284	37.5284	37.6915	38	1	0	0	0	0	10	32	5	3	0	1	0	1	0	1	0
0162071	18-APR-14	26-APR-14	13.5	23-JAN-15	28	23-JAN-15	131	23-JAN-15	1.58	23-JAN-15	0.9	17-JAN-15	13	17-JAN-15	8	17-JAN-15	42	17-JAN-15	2.2	17-JAN-15	2.37	Y	1	-0.105361	0.86289	0.86289	0.457425	0.457425	24.2519	24.2519	27.37	27	3	1	1	0	0	13	82	10	1	0	1	0	0	1	1	0
7021179	08-DEC-14	09-DEC-14	12.7	03-APR-15	305	03-APR-15	136	03-APR-15	0.8	03-APR-15	1.3	09-MAR-15	26	09-MAR-15	28	09-MAR-15	83	09-MAR-15	4.4	09-MAR-15	1.11		0.262364	0.262364	0.10436	0.10436	1	-0.223144	18.1606	18.1606	18.8813	19	1	0	0	0	1	2	9	1	0	0	0	0	0	0	1	0
8256025	22-OCT-14	28-OCT-14	5.8	04-JUN-16	68	04-JUN-16	136	03-JUN-16	0.77	03-JUN-16	1.1	03-JUN-16	40	03-JUN-16	21	03-JUN-16	145	03-JUN-16	3.2	25-NOV-15	1.20	Y	0.0953102	0.0953102	0.182322	0.182322	1	-0.261365	18.4023	18.4023	19.115	19	1	0	0	0	0	7	32	2	2	0	1	0	0	1	1	0	1
2199685	16-DEC-15	17-DEC-15	5.6	11-DEC-15	137	11-DEC-15	124	11-DEC-15	1.08	11-DEC-15	3.4	11-DEC-15	302	11-DEC-15	93	11-DEC-15	164	11-DEC-15	1	11-DEC-15	1.61		1.22378	1.22378	0.476234	0.476234	0.076961	0.076961	17.1262	17.1262	26.9391	27	2	1	0	0	0	4	10	0	3	0	0	0	0	0	1	1
2032102	15-FEB-13	16-MAR-13	4.2	16-MAR-13	106	16-MAR-13	136	16-MAR-13	1.53	16-MAR-13	1.3	06-MAR-13	33	06-MAR-13	23	06-MAR-13	140	06-MAR-13	1.5	06-MAR-13	1.13		0.262364	0.262364	0.122218	0.122218	0.425268	0.425268	12.8604	12.8604	13.756	14	1	1	1	0	0	3	67	2	0	0	0	0	1	0	1	0
0824344	05-FEB-13	07-FEB-13	20.4	01-APR-13	133	01-APR-13	128	01-APR-13	4.29	01-APR-13	3.5	01-APR-13	49	01-APR-13	32	01-APR-13	92	01-APR-13	2.4	01-APR-13	1.51	Y	1.25276	1.25276	0.41211	0.41211	1.45629	1.45629	29.7177	29.7177	32.7716	33	1	0	0	0	1	2	38	1	0	0	0	0	1	1	1	0	1
1768212	16-MAR-13	18-MAR-13	9.7	24-APR-13	116	24-APR-13	130	24-APR-13	0.94	24-APR-13	21.3	22-APR-13	308	22-APR-13	46	22-APR-13	103	22-APR-13	3.2	22-APR-13	2.00	Y	3.05871	3.05871	0.693147	0.693147	1	-0.0618754	35.3252	35.3252	36.405	36	1	0	0	1	1	2	20	1	0	0	0	0	1	1	1	1	1
2212866	12-MAR-14	16-MAR-14	16.5	14-MAR-14	83	14-MAR-14	131	14-MAR-14	5.18	14-MAR-14	7.9	14-MAR-14	36	14-MAR-14	23	14-MAR-14	79	14-MAR-14	2.9	14-MAR-14	1.30	Y	2.06686	2.06686	0.262364	0.262364	1.64481	1.64481	32.922	32.922	34.3234	34	2	0	0	0	1	3	11	1	1	0	0	0	1	0	1	1
1443436	06-MAR-14	13-MAR-14	3.8	27-AUG-15	260	27-AUG-15	130	22-SEP-15	1.44	22-SEP-15	1	27-AUG-15	73	27-AUG-15	19	27-AUG-15	84	27-AUG-15	1.1	27-AUG-15	1.09	Y	0	0	0.0861777	0.0861777	0.364643	0.364643	10.8848	10.8848	17.6104	18	1	0	0	0	1	1	7	0	0	0	0	0	0	0	0	0
1434288	21-MAY-12	24-MAY-12	13	31-AUG-15	454	31-AUG-15	137	31-AUG-15	0.87	31-AUG-15	2.2	31-AUG-15	81	31-AUG-15	90	31-AUG-15	160	31-AUG-15	3.8	31-AUG-15	2.25	Y	0.788457	0.788457	0.81093	0.81093	1	-0.139262	28.0628	28.0628	28.0628	28	1	0	0	0	1	3	18	0	1	0			1	0	1	0
2076586	26-JUN-15	29-JUN-15	6.7	22-MAR-16	123	22-MAR-16	139	22-MAR-16	0.77	22-MAR-16	1.1	22-MAR-16	24	22-MAR-16	16	22-MAR-16	89	22-MAR-16	3.7	13-DEC-15	1.13	Y	0.0953102	0.0953102	0.122218	0.122218	1	-0.261365	17.7291	17.7291	16.2592	16	2	0	0	0	0	7	35	2	2	0	0	0	0	0	0	0
2287947	03-OCT-15	04-OCT-15	3.3	04-OCT-15	81	04-OCT-15	134	04-OCT-15	0.51	04-OCT-15	1.6	04-OCT-15	33	04-OCT-15	26	04-OCT-15	93	04-OCT-15	3.3	04-OCT-15	1.14		0.470004	0.470004	0.131028	0.131028	1	-0.673345	19.2441	19.2441	21.299	21	1	1	1	1	1	1	2	0	0	0	0	0	1	1	1	0
1559228	14-JUL-14	04-AUG-14	4.6	09-JAN-16	152	09-JAN-16	136	09-JAN-16	3.26	09-JAN-16	4.3	04-JAN-16	17	04-JAN-16	8	04-JAN-16	339	04-JAN-16	2.5	28-DEC-15	1.47	Y	1.45862	1.45862	0.385262	0.385262	1.18173	1.18173	27.5676	27.5676	27.9779	28	1	0	1	0	0	5	83	0	1	0	1	0	0		1	0
0720336	30-MAR-13	03-APR-13	15.3	02-APR-13	95	02-APR-13	126	02-APR-13	3.66	02-APR-13	19.1	02-APR-13	160	02-APR-13	61	02-APR-13	45	02-APR-13	2.1	02-APR-13	3.76	Y	2.94969	2.94969	1.32442	1.32442	1.29746	1.29746	44.83	40	40	40	1	1	0	0	1	2	6	1	0	0	1	0	0		1	0
8073916	28-JAN-13	28-FEB-13	5.2	12-JUN-13	95	12-JUN-13	127	12-JUN-13	1.48	12-JUN-13	4.4	12-JUN-13	95	12-JUN-13	72	12-JUN-13	317	12-JUN-13	3.2	12-JUN-13		Y	1.4816	1.4816	1	#NUM!	0.392042	0.392042	26.9823	26.9823	31.2781	31	1	1	0	0	0	2	35	0	0	1	0	0	1		1	0
8028011	17-APR-14	25-APR-14	11.8	24-APR-14	74	24-APR-14	135	24-APR-14	0.24	24-APR-14	36.3	20-APR-14	91	19-APR-14	26	19-APR-14	356	19-APR-14	2.6	19-APR-14	1.50	Y	3.59182	3.59182	0.405465	0.405465	1	-1.42712	34.1183	34.1183	34.5065	35	5					2	28	1	0	0	1	0	1	1	1	0	1
1362333	02-DEC-13	22-DEC-13	15.9	13-AUG-14	226	13-AUG-14	128	13-AUG-14	1.12	13-AUG-14	1.1	13-AUG-14	91	13-AUG-14	16	13-AUG-14	514	13-AUG-14	2.2	13-AUG-14	1.26	Y	0.0953102	0.0953102	0.231112	0.231112	0.113329	0.113329	10.4633	10.4633	19.2357	19	1	0	0	0	1	1	20	0	0	0	0	0	1	1	1	0	1
1336695	04-OCT-12	12-OCT-12	4.8	04-SEP-15	95	04-SEP-15	152	06-SEP-15	0.91	06-SEP-15	0.8	06-SEP-15	47	06-SEP-15	75	06-SEP-15	167	06-SEP-15	2.4	06-SEP-15	1.18	Y	1	-0.223144	0.165514	0.165514	1	-0.0943107	21.6338	21.6338	12.5425	13	1	1	0	0	0	2	20	0	0	0	1	0	1	0	1	0
1360823	22-MAR-13	25-MAR-13	5.1	25-MAR-13	42	25-MAR-13	132	25-MAR-13	0.6	25-MAR-13	2	25-MAR-13	103	25-MAR-13	75	25-MAR-13	157	25-MAR-13	2.3	25-MAR-13	1.18		0.693147	0.693147	0.165514	0.165514	1	-0.510826	20.4739	20.4739	23.6957	24	1	0	0	0	1	1	3	0	0	0	0	0	1	0	1	0
8205907	10-SEP-13	13-SEP-13	4.6	17-FEB-16	118	17-FEB-16	142	16-NOV-15	0.64	16-NOV-15	1	16-NOV-15	77	16-NOV-15	48	16-NOV-15	70	16-NOV-15	3.6	16-NOV-15	1.10	Y	0	0	0.0953102	0.0953102	1	-0.446287	17.0675	17.0675	13.2836	13	1	1	0	0	0	1	3	0	0	0	0	0	0	0	0	0
8136151	28-JUL-14	08-AUG-14	17.8	08-AUG-14	36	08-AUG-14	143	08-AUG-14	3.18	08-AUG-14	2.8	01-AUG-14	125	28-JUL-14	61	28-JUL-14	364	28-JUL-14	1.6	28-JUL-14	1.46	Y	1.02962	1.02962	0.378436	0.378436	1.15688	1.15688	25.6318	25.6318	22.7869	23	2	1	0		1	2	12	0	0	0	1	0	1		1	1
7014335	08-OCT-14	14-OCT-14	3.6	14-OCT-14	54	14-OCT-14	130	18-NOV-14	0.74	18-NOV-14	3	18-NOV-14	36	18-NOV-14	21	18-NOV-14	118	18-NOV-14	3.1	18-NOV-14	1.27		1.09861	1.09861	0.239017	0.239017	1	-0.301105	22.8297	22.8297	26.7961	27	4	1	1	0	1	1	6	0	0	0			0	0	1	0
7049860	23-JAN-15	31-JAN-15	5.1	31-JAN-15	70	31-JAN-15	131	31-JAN-15	0.72	31-JAN-15	3.3	29-JAN-15	69	29-JAN-15	45	29-JAN-15	159	29-JAN-15	3	30-JAN-15	1.67		1.19392	1.19392	0.512824	0.512824	1	-0.328504	26.2567	26.2567	28.9778	29	1	0	0			1	8	0	0	0	0	0	1		1	1
2237335	20-AUG-13	27-AUG-13	1.7	23-APR-15	59	23-APR-15	139	22-APR-15	0.63	22-APR-15	3.3	23-APR-15	62	23-APR-15	42	23-APR-15	116	23-APR-15	2.1	23-APR-15	1.32	Y	1.19392	1.19392	0.277632	0.277632	1	-0.462035	23.6225	23.6225	22.5416	23	1	0	0	1	1	7	50	3	0	0	0	0	1	0	0	0	0
1589181	01-DEC-15	04-DEC-15	7.7	19-AUG-16	42	19-AUG-16	136	20-AUG-16	3.77	20-AUG-16	3.3	12-AUG-16	27	12-AUG-16	38	12-AUG-16	134	12-AUG-16	2.2	24-DEC-15	1.95	Y	1.19392	1.19392	0.667829	0.667829	1.32708	1.32708	31.1228	31.1228	31.4158	31	3	1	1	0	1	10	89	3	2	0	0	1	1	1	1	0
2218273	11-JAN-13	12-JAN-13	4.1	23-FEB-13	44	23-FEB-13	139	23-FEB-13	0.66	23-FEB-13	2.8	23-FEB-13	114	23-FEB-13	48	23-FEB-13	160	23-FEB-13	2.5	23-FEB-13	1.42		1.02962	1.02962	0.350657	0.350657	1	-0.415515	23.8193	23.8193	22.7514	23	2	0	0	1	1	1	1	0	0	0	0	0	0	0	0	0
1923380	11-APR-08	28-APR-08	17.7	27-APR-08	134	27-APR-08	139	27-APR-08	1.5	27-APR-08	16.2	27-APR-08	34	27-APR-08	14	27-APR-08	223	27-APR-08	2.3	27-APR-08	1.67	Y	2.78501	2.78501	0.512824	0.512824	0.405465	0.405465	26.5813	26.5813	25.6956	26
1802783	25-SEP-08	03-OCT-08	6.9	01-OCT-08	109	01-OCT-08	127	01-OCT-08	3.97	01-OCT-08	3.9	29-SEP-08	24	29-SEP-08	10	29-SEP-08	98	29-SEP-08	2.8	29-SEP-08	1.72		1.36098	1.36098	0.542324	0.542324	1.37877	1.37877	30.8433	30.8433	33.865	34
1916596	30-JAN-09	10-FEB-09	2	10-FEB-09	9999999	10-FEB-09	137	10-FEB-09	2.98	10-FEB-09	15.9	10-FEB-09	942	10-FEB-09	199	10-FEB-09	43	10-FEB-09	1.7	10-FEB-09	3.90	Y	2.76632	2.76632	1.36098	1.36098	1.09192	1.09192	42.5793	40	40	40
1800645	10-MAY-09	22-MAY-09	6.1	18-AUG-09	63	18-AUG-09	138	18-AUG-09	1.17	18-AUG-09	4	18-AUG-09	40	18-AUG-09	35	18-AUG-09	111	18-AUG-09	4.1	18-AUG-09	1.30		1.38629	1.38629	0.262364	0.262364	0.157004	0.157004	16.1112	16.1112	15.3229	15
1650491	17-DEC-08	19-DEC-08	3.3	07-AUG-09	9999999	07-AUG-09	125	07-AUG-09	1.77	07-AUG-09	8.4	07-AUG-09	48	07-AUG-09	28	07-AUG-09	107	07-AUG-09	2.6	07-AUG-09	1.91	Y	2.12823	2.12823	0.647103	0.647103	0.57098	0.57098	27.1865	27.1865	32.2607	32
2003554	18-SEP-09	19-SEP-09	5.4	19-SEP-09	93	19-SEP-09	140	19-SEP-09	0.65	19-SEP-09	9999999	18-SEP-09	61	18-SEP-09	38	18-SEP-09	105	18-SEP-09	2.6	18-SEP-09	1.18		16.1181	16.1181	0.165514	0.165514	1	-0.430783	78.7802	40	40	40
2012781	27-NOV-09	30-NOV-09	5.9	30-NOV-09	106	30-NOV-09	137	30-NOV-09	0.61	30-NOV-09	9999999	27-NOV-09	123	27-NOV-09	133	27-NOV-09	104	27-NOV-09	3.4	27-NOV-09	1.06		16.1181	16.1181	0.0582689	0.0582689	1	-0.494296	77.579	40	40	40
1714714	01-JAN-10	04-JAN-10	5	03-JAN-10	123	03-JAN-10	131	03-JAN-10	2.13	03-JAN-10	2.1	03-JAN-10	24	03-JAN-10	12	03-JAN-10	277	03-JAN-10	9999999	03-JAN-10	1.13		0.741937	0.741937	0.122218	0.122218	0.756122	0.756122	17.8394	17.8394	22.2272	22
1664748	31-DEC-08	23-JAN-09	7.1	11-MAR-10	191	11-MAR-10	133	06-MAR-10	0.55	06-MAR-10	0.5	08-JAN-10	26	08-JAN-10	14	08-JAN-10	159	08-JAN-10	3.1	08-JAN-10	1.12	Y	1	-0.693147	0.113329	0.113329	1	-0.597837	21.0493	21.0493	23.5508	24
0577029	24-OCT-10	31-OCT-10	10.2	28-OCT-10	80	28-OCT-10	146	28-OCT-10	3.39	28-OCT-10	4.4	28-OCT-10	30	28-OCT-10	14	28-OCT-10	144	28-OCT-10	1.8	28-OCT-10	1.39		1.4816	1.4816	0.329304	0.329304	1.22083	1.22083	27.402	27.402	23.6604	24
0535127	31-MAR-11	05-APR-11	11.3	10-JUN-11	9999999	10-JUN-11	126	10-JUN-11	1.35	10-JUN-11	1.8	03-JUN-11	48	03-JUN-11	23	03-JUN-11	234	03-JUN-11	2.2	03-JUN-11	1.75	Y	0.587787	0.587787	0.559616	0.559616	0.300105	0.300105	17.7915	17.7915	25.8532	26
0801825	04-MAR-10	15-MAR-10	7.3	17-FEB-16	243	17-FEB-16	140	17-FEB-16	1.58	17-FEB-16	0.6	17-FEB-16	24	17-FEB-16	17	17-FEB-16	111	17-FEB-16	3.8	23-JUL-15	1.05	Y	1	-0.510826	0.0487902	0.0487902	0.457425	0.457425	15.134	15.134	12.6723	13	1	0	1	1	1	5	70	2	1	0	1	0
1924573	25-DEC-08	02-JAN-09	4	15-AUG-16	138	15-AUG-16	137	15-AUG-16	1.43	15-AUG-16	0.8	15-AUG-16	20	15-AUG-16	17	15-AUG-16	35	15-AUG-16	3.9	07-DEC-15	3.4	Y	1	-0.223144	1.22378	1.22378	0.357674	0.357674	27.3392	27.3392	27.3392	27
1385411	15-MAR-08	21-MAY-08	4.1	25-JAN-09	49	25-JAN-09	130	25-JAN-09	7.19	25-JAN-09	9999999	13-JAN-09	21	09-JAN-09	16	09-JAN-09	134	09-JAN-09	1.5	09-JAN-09	1.61	Y	16.1181	16.1181	0.476234	0.476234	1.97269	1.97269	91.5689	40	40	40
1983441	06-MAY-09	11-MAY-09	10	09-MAY-09	44	09-MAY-09	125	11-MAY-09	0.92	11-MAY-09	11.2	11-MAY-09	97	11-MAY-09	60	11-MAY-09	137	11-MAY-09	2.2	18-MAY-09	2.29	Y	2.41591	2.41591	0.828552	0.828552	1	-0.0833816	34.4119	34.4119	36.6248	37
2010817	11-NOV-09	20-NOV-09	17.3	20-NOV-09	9999999	20-NOV-09	134	20-NOV-09	1.02	20-NOV-09	26.1	20-NOV-09	103	20-NOV-09	70	20-NOV-09	283	20-NOV-09	2.2	20-NOV-09	2.20	Y	3.26194	3.26194	0.788457	0.788457	0.0198026	0.0198026	27.7803	27.7803	28.9901	29
2075965	23-MAR-11	27-MAR-11	5.6	26-MAR-11	115	26-MAR-11	134	26-MAR-11	0.74	26-MAR-11	9999999	23-MAR-11	163	23-MAR-11	84	23-MAR-11	437	23-MAR-11	2.2	23-MAR-11	1.62		16.1181	16.1181	0.482426	0.482426	1	-0.301105	82.3296	40	40	40
1509551	14-DEC-08	17-DEC-08	4.6	21-APR-15	172	21-APR-15	140	21-JUN-16	76.85	21-JUN-16	0.5	21-JUN-16	46	21-JUN-16	75	21-JUN-16	56	21-JUN-16	4.4	21-APR-15	1.05		1	-0.693147	0.0487902	0.0487902	4.34186	4.34186	52.308	40	40	40
2233378	16-AUG-13	18-AUG-13	6.3	18-AUG-13	195	18-AUG-13	138	18-AUG-13	0.88	18-AUG-13	1	17-AUG-13	17	17-AUG-13	22	17-AUG-13	45	17-AUG-13	3.3	17-AUG-13	1.05		0	0	0.0487902	0.0487902	1	-0.127833	16.5464	16.5464	15.7725	16	4	0	0	0	0	2	5	0	0		0	0	1
1505231	19-AUG-15	23-AUG-15	11.1	16-JUN-16	179	16-JUN-16	138	16-JUN-16	0.97	16-JUN-16	1.4	15-JUN-16	47	15-JUN-16	24	15-JUN-16	91	15-JUN-16	4.1	07-SEP-14	1.07		0.336472	0.336472	0.0676586	0.0676586	1	-0.0304592	18.0296	18.0296	17.3046	17	3	0	1
0550433	02-DEC-09	04-DEC-09	8.1	04-DEC-09	103	04-DEC-09	136	04-DEC-09	1.54	04-DEC-09	9999999	02-DEC-09	40	09-NOV-09	28	09-NOV-09	145	09-NOV-09	4.4	09-NOV-09	1.11		16.1181	16.1181	0.10436	0.10436	0.431782	0.431782	72.6574	40	40	40
1939816	14-FEB-10	02-MAR-10	13	02-MAR-10	158	02-MAR-10	129	02-MAR-10	0.55	02-MAR-10	9999999	26-FEB-10	41	22-FEB-10	39	22-FEB-10	130	22-FEB-10	2.3	22-FEB-10	1.39	Y	16.1181	16.1181	0.329304	0.329304	1	-0.597837	80.6146	40	40	40
1608238	05-NOV-11	08-NOV-11	5.3	08-NOV-11	74	08-NOV-11	139	08-NOV-11	0.84	08-NOV-11	1.2	06-NOV-11	35	06-NOV-11	33	06-NOV-11	71	06-NOV-11	2.4	06-NOV-11	1.15	Y	0.182322	0.182322	0.139762	0.139762	1	-0.174353	18.2545	18.2545	16.8193	17
1393374	07-NOV-11	10-NOV-11	39.5	10-NOV-11	9999999	10-NOV-11	127	10-NOV-11	7.73	10-NOV-11	33	10-NOV-11	818	10-NOV-11	191	10-NOV-11	163	10-NOV-11	2.5	17-NOV-11	2.38	Y	3.49651	3.49651	0.8671	0.8671	2.04511	2.04511	48.93	40	40	40
8109586	18-JUN-12	27-JUN-12	9.8	27-JUN-12	244	27-JUN-12	132	27-JUN-12	0.41	27-JUN-12	1.6	19-JUN-12	21	19-JUN-12	30	19-JUN-12	164	19-JUN-12	1.6	19-JUN-12	1.16	Y	0.470004	0.470004	0.14842	0.14842	1	-0.891598	19.4389	19.4389	22.8315	23
1602890	06-FEB-12	22-FEB-12	9.5	13-SEP-12	9999999	13-SEP-12	143	13-SEP-12	1.55	13-SEP-12	0.8	13-SEP-12	83	13-SEP-12	40	13-SEP-12	82	13-SEP-12	2.7	13-SEP-12	1.28	Y	1	-0.223144	0.24686	0.24686	0.438255	0.438255	17.1689	17.1689	12.6484	13
1866165	11-JUN-15	18-JUN-15	6.5	22-JUN-16	137	22-JUN-16	134	22-JUN-16	0.94	22-JUN-16	0.8	22-JUN-16	20	22-JUN-16	11	22-JUN-16	67	22-JUN-16	3.4	14-DEC-15	1.02	Y	1	-0.223144	0.0198026	0.0198026	1	-0.0618754	20.0018	20.0018	21.9816	22	1	0	0	0	1	2	9	0	0	0	0	0	0	1	1	0	1
7021900	07-DEC-14	11-DEC-14	8.5	11-DEC-14	131	11-DEC-14	133	11-DEC-14	0.63	11-DEC-14	2.2	11-DEC-14	82	11-DEC-14	39	11-DEC-14	118	11-DEC-14	1.8	11-DEC-14	1.29	Y	0.788457	0.788457	0.254642	0.254642	1	-0.462035	21.8324	21.8324	24.2305	24	1	0	0	0	1	3	7	1	1	0	0	0	1	1	1	0	1
1266004	31-MAR-11	01-APR-11	3.3	05-AUG-16	53	05-AUG-16	134	05-AUG-16	0.59	05-AUG-16	0.9	02-AUG-16	65	02-AUG-16	16	02-AUG-16	86	02-AUG-16	2.8	10-APR-15	1.28	Y	1	-0.105361	0.24686	0.24686	1	-0.527633	22.5448	22.5448	24.2729	24	1	0	0	1	1	5	17	1	0	0	0	0	1	1	0	0	1
1337676	28-NOV-10	03-DEC-10	6.5	14-AUG-16	77	14-AUG-16	140	14-AUG-16	0.88	14-AUG-16	4.2	14-AUG-16	72	14-AUG-16	37	14-AUG-16	166	14-AUG-16	3.3	15-SEP-15	1.33	Y	1.43508	1.43508	0.285179	0.285179	1	-0.127833	24.6186	24.6186	23.0959	23	2	0	1	1	1	1	2	0	0	0	0	0	1	1	1	0	1
0903608	05-JUN-15	08-JUN-15	16.8	17-FEB-16	98	17-FEB-16	143	18-FEB-16	0.44	18-FEB-16	3.5	18-FEB-16	118	18-FEB-16	300	18-FEB-16	230	18-FEB-16	2.7	25-SEP-15	1.09	Y	1.25276	1.25276	0.0861777	0.0861777	1	-0.820981	21.7006	21.7006	18.0774	18	4	0	0	1	1	4	25	1	0	0	0	0	1	1	1	0	1
0440159	13-JAN-13	22-JAN-13	4.8	16-MAR-16	131	16-MAR-16	136	16-MAR-16	3.6	16-MAR-16	0.5	16-MAR-16	52	16-MAR-16	34	16-MAR-16	115	16-MAR-16	1.9	25-DEC-15	1.49	Y	1	-0.693147	0.398776	0.398776	1.28093	1.28093	26.9348	26.9348	27.366	27	3	0	1	0	1	11	96	4	4	0	1	0	1	0	1	0
2076761	29-MAR-11	07-APR-11	5.2	06-APR-11	91	06-APR-11	131	07-APR-11	0.82	07-APR-11	1.8	06-APR-11	54	06-APR-11	30	06-APR-11	192	06-APR-11	1.9	06-APR-11	1.44		0.587787	0.587787	0.364643	0.364643	1	-0.198451	22.3058	22.3058	25.8093	26	0	0	0	0	1	1	9	0	0	0	0	0	1	0	1	0	999
0498235	02-MAY-12	30-MAY-12	7.1	26-JUN-13	179	26-JUN-13	140	26-JUN-13	1.74	26-JUN-13	9999999	26-JUN-13	33	26-JUN-13	55	26-JUN-13	64	26-JUN-13	3.9	26-JUN-13	0.94	Y	16.1181	16.1181	-0.0618754	-0.0618754	0.553885	0.553885	71.9641	40	40	40	2	0	0	1	1	3	56	2	0	1	0	0	1	1	0	0	999
0846790	02-SEP-14	25-SEP-14	4.9	24-SEP-14	9999999	24-SEP-14	137	24-SEP-14	4.24	24-SEP-14	5	23-SEP-14	41	23-SEP-14	19	23-SEP-14	197	23-SEP-14	3.2	23-SEP-14	1.52	Y	1.60944	1.60944	0.41871	0.41871	1.44456	1.44456	31.0277	31.0277	31.0277	31	1	1	1	0	0	15	135	7	5	0	0	1	1	0	0	0	999
0774256	21-FEB-14	04-MAR-14	9.2	02-MAR-15	9999999	02-MAR-15	137	24-NOV-15	5.44	02-MAR-15	0.7	28-FEB-15	43	28-FEB-15	28	28-FEB-15	442	28-FEB-15	3.9	28-FEB-15	1.15	Y	1	-0.356675	0.139762	0.139762	1.69378	1.69378	27.9848	27.9848	27.9848	28	1	1	1	0	0	12	100	3	4	0	0	0	1	1	1	0	1
0908610	09-APR-15	13-APR-15	3.5	13-APR-15	126	13-APR-15	131	13-APR-15	1.68	13-APR-15	4.3	09-APR-15	141	09-APR-15	55	09-APR-15	362	09-APR-15	1.5	09-APR-15	1.37	Y	1.45862	1.45862	0.314811	0.314811	0.518794	0.518794	20.4343	20.4343	24.3083	24	2	1	0	0	0	2	15	1	0	0	0	0	0	1	1	0	1
2128915	29-NOV-15	03-DEC-15	4.5	19-JUL-16	9999999	19-JUL-16	137	19-JUL-16	0.53	19-JUL-16	2.1	19-JUL-16	43	19-JUL-16	20	19-JUL-16	84	19-JUL-16	2.7	06-DEC-15	1.72		0.741937	0.741937	0.542324	0.542324	1	-0.634878	24.8786	24.8786	24.8786	25	2	1	1	1	1	11	31	3	2	0	0	0	1	0	1	0	999
2081342	29-APR-11	30-APR-11	4.8	30-APR-11	9999999	30-APR-11	130	30-APR-11	0.8	30-APR-11	9999999	29-APR-11	36	29-APR-11	19	29-APR-11	98	29-APR-11	9999999	29-APR-11	1.65		16.1181	16.1181	0.500775	0.500775	1	-0.223144	82.5351	40	40	40	0	1	0	0	0	1	2	0	0	0	0	0	0	0	1	0	999
8054783	04-JAN-12	20-JAN-12	8.3	10-JAN-12	55	10-JAN-12	137	10-JAN-12	0.6	10-JAN-12	25.4	10-JAN-12	76	10-JAN-12	44	10-JAN-12	239	10-JAN-12	2.7	13-JAN-12	1.76	Y	3.23475	3.23475	0.565314	0.565314	1	-0.510826	34.5589	34.5589	34.5589	35	1	0	0	0	1	4	43	1	2	0	1	0	1	0	0	0	999
1093341	03-APR-12	01-MAY-12	17.8	23-APR-12	9999999	23-APR-12	152	23-APR-12	1.58	23-APR-12	9999999	21-APR-12	328	19-APR-12	106	19-APR-12	169	19-APR-12	1.5	19-APR-12	1.62	Y	16.1181	16.1181	0.482426	0.482426	0.457425	0.457425	77.1371	40	40	40	2	1	0	0	0	1	28	0	0	0	1	0	1	1	0	0	999
8403699	10-JUL-12	21-JUL-12	6	17-JUL-12	164	17-JUL-12	136	17-JUL-12	3.14	17-JUL-12	9999999	13-JUL-12	39	11-JUL-12	16	11-JUL-12	124	11-JUL-12	3.3	11-JUL-12	1.05	Y	16.1181	16.1181	0.0487902	0.0487902	1.14422	1.14422	78.8531	40	40	40	1	1	1	0	1	5	33	1	1	0	1	0	0	0	1	0	999
0863258	06-JAN-13	10-JAN-13	15.2	22-JAN-13	165	22-JAN-13	136	22-JAN-13	2.12	22-JAN-13	9999999	21-JAN-13	44	19-JAN-13	17	19-JAN-13	112	19-JAN-13	3.2	19-JAN-13	1.58	Y	16.1181	16.1181	0.457425	0.457425	0.751416	0.751416	79.6706	40	40	40	1	1	0	0	1	5	28	2	1	0	0	0	1	0	1	0	999
0586741	23-MAR-14	27-MAR-14	9.7	25-MAR-14	9999999	25-MAR-14	132	26-MAR-14	3.46	25-MAR-14	9999999	24-MAR-14	17	24-MAR-14	9	24-MAR-14	99	24-MAR-14	1.1	24-MAR-14	2.11	Y	16.1181	16.1181	0.746688	0.746688	1.24127	1.24127	87.5982	40	40	40	2	1	1	0	1	13	51	6	2	0	1	0	1	0	1	0	999
0269467	25-MAY-14	27-MAY-14	3.5	09-OCT-15	118	09-OCT-15	137	09-OCT-15	0.65	09-OCT-15	1.9	21-JUL-15	67	21-JUL-15	35	21-JUL-15	77	21-JUL-15	2.5	21-JUL-15	1.26		0.641854	0.641854	0.231112	0.231112	1	-0.430783	21.0147	21.0147	21.0147	21	2	0	0	0	1	4	16	0	1	0	0	0	1	0	0	0	999
7034495	17-MAY-15	11-JUN-15	3.9	11-JUN-15	85	11-JUN-15	133	11-JUN-15	1.38	11-JUN-15	1.2	11-JUN-15	66	11-JUN-15	15	11-JUN-15	80	11-JUN-15	2.8	11-JUN-15	1.71	Y	0.182322	0.182322	0.536493	0.536493	0.322083	0.322083	16.2102	16.2102	19.3505	19	1	1	1	0	1	2	29	0	0	0	0	0	1	1	1	0	1
1781195	14-NOV-10	22-NOV-10	10.3	22-NOV-10	9999999	22-NOV-10	135	22-NOV-10	0.66	22-NOV-10	1.6	22-NOV-10	73	22-NOV-10	19	22-NOV-10	85	22-NOV-10	1.7	22-NOV-10	1.85	Y	0.470004	0.470004	0.615186	0.615186	1	-0.415515	24.6667	24.6667	25.6787	26	0	0	0	0	1	1	8	0	0	0	0	0	1	1	1	1	1
0598660	03-JUN-11	16-JUN-11	5.1	16-JUN-11	102	16-JUN-11	121	16-JUN-11	1.89	16-JUN-11	3.4	15-JUN-11	43	15-JUN-11	18	15-JUN-11	58	15-JUN-11	3.5	15-JUN-11	1.44	Y	1.22378	1.22378	0.364643	0.364643	0.636577	0.636577	21.2319	21.2319	31.1415	31	1	0	1	1	1	4	18	2	1	0	0	0	1	0	1	0	999
2056279	03-MAR-11	11-MAR-11	5.8	27-JUL-11	96	27-JUL-11	133	27-JUL-11	4.62	27-JUL-11	1	27-JUL-11	35	27-JUL-11	15	27-JUL-11	95	27-JUL-11	1.9	27-JUL-11	1.22	Y	0	0	0.198851	0.198851	1.53039	1.53039	23.303	23.303	25.507	26	1	0	0	1	1	1	8	0	0	0	0	0	1	0	1	0	999
2107577	25-AUG-12	21-OCT-12	21	16-OCT-12	9999999	16-OCT-12	138	16-OCT-12	4.39	16-OCT-12	7.5	15-OCT-12	39	15-OCT-12	14	15-OCT-12	100	15-OCT-12	1.8	15-OCT-12	2.93	Y	2.0149	2.0149	1.075	1.075	1.47933	1.47933	40.2435	40	40	40	0	0	0	0	1	5	72	1	3	0	1	0	1	0	1	0	999
0404202	11-DEC-12	16-DEC-12	19.7	16-DEC-12	151	16-DEC-12	139	16-DEC-12	0.92	16-DEC-12	1.1	16-DEC-12	61	16-DEC-12	22	16-DEC-12	269	16-DEC-12	1.5	16-DEC-12	1.69	Y	0.0953102	0.0953102	0.524729	0.524729	1	-0.0833816	22.2372	22.2372	21.0649	21	1	1	0	0	1	3	29	0	1	0	1	0	1	0	0	0	999
1198263	02-JUN-12	07-JUN-12	4	14-FEB-13	58	14-FEB-13	135	14-FEB-13	6.39	14-FEB-13	1.2	14-FEB-13	47	14-FEB-13	27	14-FEB-13	111	14-FEB-13	3	14-FEB-13	1.20	Y	0.182322	0.182322	0.182322	0.182322	1.85473	1.85473	26.911	26.911	27.7749	28	1	1	1	1	1	17	149	5	9	0	0	0	1	0	0	0	999
2230370	31-MAR-13	22-APR-13	3.6	22-APR-13	103	22-APR-13	132	22-APR-13	0.95	22-APR-13	1.3	22-APR-13	43	22-APR-13	18	22-APR-13	100	22-APR-13	2.3	22-APR-13	1.23		0.262364	0.262364	0.207014	0.207014	1	-0.0512933	19.3103	19.3103	22.7241	23	1	0	1	0	0	1	22	0	0	0	0	0	0	0	1	0	999
0926164	31-AUG-13	13-SEP-13	3.7	13-SEP-13	90	13-SEP-13		13-SEP-13	0.79	13-SEP-13	8.4	13-SEP-13	47	13-SEP-13	17	13-SEP-13	27	13-SEP-13	4.7	13-SEP-13	2.46	Y	2.12823	2.12823	0.900161	0.900161	1	-0.235722	34.1265	34.1265	NA	#VALUE!	1	0	0	0	1	1	13	0	0	0	0	0	0	0	1	0	999
1182524	22-APR-14	25-APR-14	6.2	25-APR-14	9999999	25-APR-14	132	25-APR-14	0.98	25-APR-14	9999999	22-APR-14	53	22-APR-14	24	22-APR-14	147	22-APR-14	2.6	22-APR-14	1.94	Y	16.1181	16.1181	0.662688	0.662688	1	-0.0202027	84.3485	40	40	40	5	1	1	0	1	3	15	0	1	0	0	0	1	1	0	0	1
1351013	21-FEB-09	22-FEB-09	5.9	05-JUL-16	96	05-JUL-16	139	05-JUL-16	1.03	05-JUL-16	2.1	05-JUL-16	34	05-JUL-16	23	05-JUL-16	95	05-JUL-16	3.9	08-DEC-15	1.10	Y	0.741937	0.741937	0.0953102	0.0953102	0.0295588	0.0295588	10.5849	10.5849	8.64348	9	1	0	0	0	0	2	6	0	0	0	0	0	0	1	0	0	999
1842820	17-FEB-09	25-FEB-09	7.6	02-AUG-16	191	02-AUG-16	140	02-AUG-16	1.19	02-AUG-16	9999999	02-AUG-16	30	02-AUG-16	36	02-AUG-16	83	02-AUG-16	4.2	17-DEC-15	1.22	Y	16.1181	16.1181	0.198851	0.198851	0.173953	0.173953	71.2483	40	40	40	2	1	1	1	1	3	10	1	0	1	0	0	0	0	0	0	999
8149481	27-NOV-15	01-DEC-15	3.4	17-JUN-16	61	17-JUN-16	131	20-JUL-16	1.25	20-JUL-16	1	20-JUL-16	32	20-JUL-16	27	20-JUL-16	136	20-JUL-16	3	22-DEC-15	0.99		0	0	-0.0100503	-0.0100503	0.223144	0.223144	8.45292	8.45292	14.6992	15	1	1	0	0	1	3	8	1	0	0	0	0	0	0	1	0	999
1465390	11-JUL-11	13-JUL-11	1.8	30-MAY-12	90	30-MAY-12	136	30-MAY-12	1.07	30-MAY-12	1	30-MAY-12	60	30-MAY-12	92	30-MAY-12	83	30-MAY-12	3.5	30-MAY-12	1.15	Y	0	0	0.139762	0.139762	0.0676586	0.0676586	8.64283	8.64283	9.67761	10	1	1	0	0	0	3	10	0	1	0	0	0	1	0	1	0	999
1764589	23-AUG-12	25-AUG-12	14.8	25-AUG-12	9999999	25-AUG-12	142	25-AUG-12	3.18	25-AUG-12	1.5	25-AUG-12	48	25-AUG-12	37	25-AUG-12	103	25-AUG-12	2	25-AUG-12	1.66		0.405465	0.405465	0.506818	0.506818	1.15688	1.15688	24.7104	24.7104	22.1876	22	1	1	0	0	0	4	0	3	0	0	1	0	1	1	1	0	999
2304405	14-APR-14	25-APR-14	2.6	25-APR-14	30	25-APR-14	132	23-APR-14	0.77	23-APR-14	2.1	25-APR-14	55	25-APR-14	29	25-APR-14	146	25-APR-14	1.8	25-APR-14	1.46	Y	0.741937	0.741937	0.378436	0.378436	1	-0.261365	23.043	23.043	25.8409	26	2	0	0	0	1	1	11	0	0	0	0	0	0	1	0	0	1
1562597	24-JUL-14	29-JUL-14	5.7	30-APR-16	9999999	30-APR-16	137	30-APR-16	0.83	30-APR-16	9999999	26-APR-16	55	26-APR-16	29	26-APR-16	177	26-APR-16	2.8	24-JUL-14	1.19	Y	16.1181	16.1181	0.173953	0.173953	1	-0.18633	78.8747	40	40	40	1	0	0	0	1	8	38	2	1	0	0	0	1	1	0	0	1
1040558	08-APR-14	08-JUN-14	3	15-APR-15	9999999	15-APR-15	141	15-APR-15	1.03	15-APR-15	4.5	22-OCT-14	47	22-OCT-14	18	22-OCT-14	64	22-OCT-14	5.1	22-OCT-14	2.11	Y	1.50408	1.50408	0.746688	0.746688	0.0295588	0.0295588	20.7612	20.7612	18.2217	18	1	0	0	1	1	4	107	1	1	0	0	0	1	0	0	0	999
0964241	02-NOV-14	08-NOV-14	18	08-NOV-14	9999999	08-NOV-14	125	08-NOV-14	0.67	08-NOV-14	15.3	08-NOV-14	103	08-NOV-14	44	08-NOV-14	245	08-NOV-14	2.2	08-NOV-14	1.36		2.72785	2.72785	0.307485	0.307485	1	-0.400478	29.7551	29.7551	33.8121	34	1	0	0	0	1	1	6	0	0	0	0	0	1	0	1	0	999
0894046	17-MAR-15	23-MAR-15	21.8	16-MAY-15	9999999	16-MAY-15	135	16-MAY-15	1.9	16-MAY-15	23.8	16-MAY-15	192	16-MAY-15	59	16-MAY-15	167	16-MAY-15	1.6	16-MAY-15	2.76	Y	3.16969	3.16969	1.01523	1.01523	0.641854	0.641854	35.9245	35.9245	36.1935	36	1	0	0	1	0	6	35	0	3	0	0	1	1	0	1	0	999
0526639	27-JUL-12	01-AUG-12	11.9	10-APR-16	250	10-APR-16	137	10-APR-16	1.3	10-APR-16	9999999	10-APR-16	30	10-APR-16	37	10-APR-16	83	10-APR-16	3.4	22-NOV-15	0.90	Y	16.1181	16.1181	-0.105361	-0.105361	0.262364	0.262364	68.6872	40	40	40	1	0	0	0	1	13	33	6	6	1	0	0	1	1	1	0	999
2026020	11-MAR-10	13-MAR-10	2.3	03-JUN-10	61	03-JUN-10	137	03-JUN-10	1.36	03-JUN-10	2.1	03-JUN-10	53	03-JUN-10	25	03-JUN-10	129	03-JUN-10	1.9	03-JUN-10	1.26	Y	0.741937	0.741937	0.231112	0.231112	0.307485	0.307485	14.7656	14.7656	14.7656	15	0	1	0	0	1	2	12	0	1	0	0	1	1	1	1	0	1
1374599	18-FEB-11	07-MAR-11	4.2	08-JUL-11	101	08-JUL-11	131	08-JUL-11	1.8	08-JUL-11	1.3	08-JUL-11	78	08-JUL-11	41	08-JUL-11	111	08-JUL-11	2.6	08-JUL-11	1.08	Y	0.262364	0.262364	0.076961	0.076961	0.587787	0.587787	13.9088	13.9088	19.0749	19	0	1	0	0	1	2	19	0	0	1	0	0	1	0	0	0	999
8094607	17-SEP-12	22-SEP-12	12.9	06-OCT-12	231	06-OCT-12	132	06-OCT-12	1.01	06-OCT-12	9999999	06-OCT-12	85	06-OCT-12	30	06-OCT-12	151	06-OCT-12	9999999	06-OCT-12	1.51	Y	16.1181	16.1181	0.41211	0.41211	0.00995033	0.00995033	72.0673	40	40	40	1	0	0	0	1	1	5	0	0	0	0	0	1	0	1	0	999
1955555	15-NOV-12	18-NOV-12	5.8	30-NOV-12	9999999	30-NOV-12	130	29-NOV-12	6.42	29-NOV-12	1.6	28-NOV-12	96	28-NOV-12	32	28-NOV-12	254	28-NOV-12	1.7	28-NOV-12	1.86	Y	0.470004	0.470004	0.620576	0.620576	1.85942	1.85942	32.9517	32.9517	34.5799	35	1	1	1	1	1	22	230	13	6	0	1	0	1	0	0	0	999
1515011	07-JUN-12	15-JUN-12	4.5	01-AUG-13	145	01-AUG-13	138	01-AUG-13	0.98	01-AUG-13	9999999	30-JUL-13	26	19-JUL-13	21	19-JUL-13	97	19-JUL-13	4	19-JUL-13	2.08	Y	16.1181	16.1181	0.732368	0.732368	1	-0.0202027	85.1289	40	40	40	1	1	1	1	1	5	41	2	0	0	0	0	0	0	0	0	999
0981170	29-JAN-15	05-FEB-15	1.7	05-FEB-15	9999999	05-FEB-15	145	05-FEB-15	2.37	05-FEB-15	15.3	04-FEB-15	23	04-FEB-15	14	04-FEB-15	77	04-FEB-15	3.8	04-FEB-15	3.09	Y	2.72785	2.72785	1.12817	1.12817	0.86289	0.86289	37.6347	37.6347	37.0102	37	2	0	0	0	1	11	68	5	3	0	0	0	1	1	1	0	999
8127139	21-FEB-15	02-MAR-15	13.4	01-MAR-15		05-MAR-15	135	02-MAR-15	2.72	02-MAR-15	9999999	28-FEB-15	37	28-FEB-15	16	28-FEB-15	62	28-FEB-15	2.3	02-MAR-15	2.82	Y	16.1181	16.1181	1.03674	1.03674	1.00063	1.00063	88.5439	40	40	40	1	1	1	0	0	3	20	0	2	0	1	0	1	0	1	0	999
0171411	16-JUL-15	18-JUL-15	14.3	15-APR-16	78	15-APR-16	138	15-APR-16	5.88	15-APR-16	1.1	02-APR-16	55	02-APR-16	50	02-APR-16	141	02-APR-16	2.6	31-DEC-15	1.25	Y	0.0953102	0.0953102	0.223144	0.223144	1.77156	1.77156	26.2433	26.2433	25.7893	26	1	1	1	1	1	25	97	16	6	0	1	0	1	1	1	0	1
1602023	28-JAN-10	12-FEB-10	14.6	12-FEB-10	152	12-FEB-10	132	12-FEB-10	0.96	12-FEB-10	4.4	11-FEB-10	88	11-FEB-10	20	11-FEB-10	157	11-FEB-10	3.3	11-FEB-10	1.92		1.4816	1.4816	0.652325	0.652325	1	-0.040822	28.9065	28.9065	30.7369	31	0	0	0	0	1	1	15	0	0	0	0	0	0	0	0	0	999
0470775	24-AUG-10	27-AUG-10	3.6	27-AUG-10	9999999	27-AUG-10	130	27-AUG-10	0.98	27-AUG-10	9999999	25-AUG-10	51	24-AUG-10	32	24-AUG-10	121	24-AUG-10	2.8	24-AUG-10	1.08		16.1181	16.1181	0.076961	0.076961	1	-0.0202027	77.7884	40	40	40	0	0	0	0	0	1	3	0	0	0	0	0	0	0	1	0	999
0542665	08-AUG-12	28-AUG-12	5.6	15-FEB-13	186	15-FEB-13	136	27-SEP-13	0.47	27-SEP-13	0.7	27-SEP-13	38	27-SEP-13	38	27-SEP-13	84	27-SEP-13	3.6	27-SEP-13	1.09	Y	1	-0.356675	0.0861777	0.0861777	1	-0.755023	20.7452	20.7452	21.3806	21	1	0	0	0	1	3	32	0	1	0	0	0	0	0	1	0	999
2005146	04-FEB-13	05-FEB-13	7.1	05-FEB-13	65	05-FEB-13	134	05-FEB-13	0.73	05-FEB-13	0.9	05-FEB-13	44	05-FEB-13	30	05-FEB-13	87	05-FEB-13	2.8	05-FEB-13	1.16		1	-0.105361	0.14842	0.14842	1	-0.314711	21.4423	21.4423	23.2795	23	1	0	0	0	1	1	2	0	0	0	0	0	0	0	0	0	999
0125286	20-AUG-13	10-SEP-13	11.1	14-DEC-13	73	14-DEC-13	137	14-DEC-13	1.21	14-DEC-13	9999999	14-DEC-13	30	14-DEC-13	24	14-DEC-13	71	14-DEC-13	3.1	14-DEC-13	1.33	Y	16.1181	16.1181	0.285179	0.285179	0.19062	0.19062	72.3746	40	40	40	2	1	1	0	1	6	41	1	2	0	0	0	1	1	0	0	999
2041205	30-AUG-13	05-SEP-13	3.4	08-JAN-14	85	08-JAN-14	139	08-JAN-14	0.7	08-JAN-14	0.7	08-JAN-14	61	08-JAN-14	54	08-JAN-14	143	08-JAN-14	3	08-JAN-14	1.32		1	-0.356675	0.277632	0.277632	1	-0.356675	22.8895	22.8895	21.7602	22	1	0	0	0	1	1	6	0	0	0	0	0	1	0	0	0	999
1185246	01-MAR-14	30-MAR-14	11.6	16-MAY-16	232	16-MAY-16	133	16-MAY-16	0.5	16-MAY-16	9999999	16-MAY-16	32	16-MAY-16	20	16-MAY-16	103	16-MAY-16	3.6	15-AUG-14	1.43	Y	16.1181	16.1181	0.357674	0.357674	1	-0.693147	80.9324	40	40	40	2	0	0	0	1	4	14	0	1	0	0	0	1	0	1	0	999
2071340	25-AUG-11	26-AUG-11	4.5	30-JAN-15	48	30-JAN-15	134	30-JAN-15	0.93	30-JAN-15	9999999	31-JAN-15	66	30-JAN-15	38	30-JAN-15	59	30-JAN-15	2.1	30-JAN-15	1.23		16.1181	16.1181	0.207014	0.207014	1	-0.0725707	79.245	40	40	40	1	0	0	0	1	7	18	4	2	0	0	0	1	1	0	0	1
1782426	11-FEB-15	13-FEB-15	9.6	13-FEB-15	68	13-FEB-15	111	12-FEB-15	5.31	12-FEB-15	16.6	11-FEB-15	90	11-FEB-15	33	11-FEB-15	64	11-FEB-15	2.4	11-FEB-15	6.70	Y	2.8094	2.8094	1.90211	1.90211	1.66959	1.66959	54.3311	40	40	40	1	0	0	0	1	4	24	3	0	0	1	0	1	0	1	0	999
0547525	03-MAR-15	12-MAR-15	4.4	12-MAR-15	77	12-MAR-15	136	11-MAR-15	1.08	11-MAR-15	2.1	11-MAR-15	66	11-MAR-15	43	11-MAR-15	91	11-MAR-15	2	11-MAR-15	1.07	Y	0.741937	0.741937	0.0676586	0.0676586	0.076961	0.076961	10.7288	10.7288	11.6948	12	1	1	0	0	0	4	25	1	1	0	0	0	1	0	1	0	999
0234928	21-JUL-15	21-JUL-15	37.7	21-JUL-15	9999999	21-JUL-15	134	21-JUL-15	3.85	21-JUL-15	9999999	21-JUL-15	340	21-JUL-15	52	21-JUL-15	121	21-JUL-15	1.7	21-JUL-15	2.82	Y	16.1181	16.1181	1.03674	1.03674	1.34807	1.34807	91.8689	40	40	40	1	0	0	0	0	10	83	2	4	0	1	0	1	1	1	0	1
0299336	25-JUN-14	01-JUL-14	13.1	12-AUG-16	9999999	12-AUG-16	138	12-AUG-16	0.83	12-AUG-16	9999999	11-AUG-16	64	10-AUG-16	27	10-AUG-16	136	10-AUG-16	2.6	07-OCT-15	1.28		16.1181	16.1181	0.24686	0.24686	1	-0.18633	79.6912	40	40	40	1	1	1	1	1	5	24	0	1	0	0	0	1	0	1	0	999
0474619	26-OCT-15	28-OCT-15	8.6	20-AUG-16	189	20-AUG-16	139	20-AUG-16	4.22	20-AUG-16	1	20-AUG-16	38	20-AUG-16	42	20-AUG-16	125	20-AUG-16	3.1	26-OCT-15	1.08	Y	0	0	0.076961	0.076961	1.43984	1.43984	21.0712	21.0712	19.8219	20	1	0	1	0	1	9	71	2	2	0	0	0	0	1	1	0	999
1361511	20-NOV-15	22-NOV-15	10.2	22-NOV-15	117	22-NOV-15	143	22-NOV-15	1.15	22-NOV-15	0.9	21-NOV-15	54	21-NOV-15	29	21-NOV-15	64	21-NOV-15	1.8	21-NOV-15	1.02	Y	1	-0.105361	0.0198026	0.0198026	0.139762	0.139762	11.7693	11.7693	6.17963	6	1	1	0	0	1	4	9	0	1	0	0	0	1	1	1	1	999
1245214	17-APR-12	20-APR-12	6.3	10-AUG-16	132	10-AUG-16	135	19-AUG-16	9.21	11-AUG-16	1.1	08-AUG-16	20	08-AUG-16	9999999	08-AUG-16	148	08-AUG-16	3.1	23-DEC-15	2.73	Y	0.0953102	0.0953102	1.0043	1.0043	2.22029	2.22029	39.2866	39.2866	39.3337	39	1	0	1	0	1	25	144	14	11	0	1	0	0	0	1	0	999
1878457	15-APR-12	18-APR-12	7.8	18-APR-12	9999999	18-APR-12	138	18-APR-12	117.5	18-APR-12	9999999	18-APR-12	204	18-APR-12	78	18-APR-12	166	18-APR-12	1.1	18-APR-12	1.47	Y	16.1181	16.1181	0.385262	0.385262	4.76644	4.76644	117.286	40	40	40	0	0	0	0	1	2	8	1	0	0	0	0	1	0	1	0	999
1168382	15-JUN-12	27-JUN-12	6.8	27-JUN-12	62	27-JUN-12	132	27-JUN-12	0.57	27-JUN-12	1	26-JUN-12	60	26-JUN-12	27	26-JUN-12	108	26-JUN-12	1.4	26-JUN-12	1.65	Y	0	0	0.500775	0.500775	1	-0.562119	21.6087	21.6087	24.6433	25	2	0	0	0	0	4	40	1	2	0	0	0	1	0	1	0	999
0315764	03-JUN-13	02-JUL-13	2.2	10-JUN-13	71	10-JUN-13	131	10-JUN-13	0.62	10-JUN-13	9999999	10-JUN-13	68	04-JUN-13	28	04-JUN-13	182	04-JUN-13	3.3	04-JUN-13	1.41	Y	16.1181	16.1181	0.34359	0.34359	1	-0.478036	80.7746	40	40	40	0	0	0	0	1	3	85	1	1	0	0	0	1	0	0	0	999
1443289	28-APR-11	01-MAY-11	6.5	22-JUL-13	123	22-JUL-13	140	22-JUL-13	0.89	22-JUL-13	0.8	22-JUL-13	38	22-JUL-13	20	22-JUL-13	71	22-JUL-13	4.3	22-JUL-13	1.15	Y	1	-0.223144	0.139762	0.139762	1	-0.116534	21.3453	21.3453	19.4985	19	1	0	0	0	1	1	3	0	0	0	0	0	1	1	1	0	1
1941778	03-MAY-12	05-MAY-12	7.9	29-NOV-14	116	29-NOV-14	134	29-NOV-14	8.23	29-NOV-14	1.1	29-NOV-14	30	29-NOV-14	16	29-NOV-14	87	29-NOV-14	3.1	29-NOV-14	1.14	Y	0.0953102	0.0953102	0.131028	0.131028	2.10779	2.10779	28.4293	28.4293	29.5748	30	1	1	1	1	0	9	23	2	3	0	1	0	0	0	0	0	999
2121577	22-FEB-12	03-MAR-12	7	03-MAR-12	358	03-MAR-12	137	03-MAR-12	0.72	03-MAR-12	9999999	22-FEB-12	34	22-FEB-12	27	22-FEB-12	58	22-FEB-12	3.9	22-FEB-12		Y	16.1181	16.1181	1	#NUM!	1	-0.328504	88.1264	40	40	40	0	0	0	0	1	1	10	0	0	0	0	0	0	0	0	0	999
2043750	20-JUL-10	23-JUL-10	11.7	23-JUL-10	94	23-JUL-10	113	23-JUL-10	1.17	23-JUL-10	9	23-JUL-10	123	23-JUL-10	51	23-JUL-10	79	23-JUL-10	2	23-JUL-10	1.93		2.19722	2.19722	0.65752	0.65752	0.157004	0.157004	23.6023	23.6023	36.5893	37	1	0	0	0	1	1	3	0	0	0	0	0	1	0	1	0	999
0786613	17-MAY-11	07-JUN-11	4.4	07-JUN-11	9999999	07-JUN-11	136	15-JUN-11	1.04	15-JUN-11	10	15-JUN-11	86	15-JUN-11	31	15-JUN-11	115	15-JUN-11	2.9	15-JUN-11	2.09	Y	2.30259	2.30259	0.737164	0.737164	0.0392207	0.0392207	23.7654	23.7654	24.3011	24	2	0	0	0	1	1	21	0	0	0	0	0	0	0	1	0	999
1114917	23-NOV-12	26-NOV-12	7.2	26-NOV-12	288	26-NOV-12	126	26-NOV-12	0.51	26-NOV-12	9999999	24-NOV-12	16	24-NOV-12	11	24-NOV-12	164	24-NOV-12	3.1	24-NOV-12	1.14		16.1181	16.1181	0.131028	0.131028	1	-0.673345	78.3939	40	40	40	1	0	1	0	1	1	3	0	1	0	0	0	0	0	1	0	999
1696105	04-DEC-10	07-DEC-10	4.6	22-MAY-13	9999999	22-MAY-13	135	22-MAY-13	0.92	22-MAY-13	0.3	22-MAY-13	39	22-MAY-13	22	22-MAY-13	65	22-MAY-13	9999999	22-MAY-13	1.05		1	-1.20397	0.0487902	0.0487902	1	-0.0833816	20.3264	20.3264	21.6249	22	1	0	0	0	1	1	3	0	0	0	0	0	0	0	1	1	999
1213187	08-JUN-13	11-JUN-13	6.7	11-JUN-13	75	11-JUN-13	140	11-JUN-13	1.03	11-JUN-13	7.2	11-JUN-13	97	11-JUN-13	32	11-JUN-13	151	11-JUN-13	1.6	11-JUN-13	2.35	Y	1.97408	1.97408	0.854415	0.854415	0.0295588	0.0295588	23.7444	23.7444	22.135	22	1	0	0	0	1	2	5	0	1	0	1	0	1	0	0	0	999
8110655	22-DEC-11	06-JAN-12	5.5	31-JUL-13	255	31-JUL-13	137	31-JUL-13	0.83	31-JUL-13	1.4	31-JUL-13	228	31-JUL-13	101	31-JUL-13	1390	31-JUL-13	3.4	31-JUL-13	1.78	Y	0.336472	0.336472	0.576613	0.576613	1	-0.18633	23.7299	23.7299	23.7299	24	1	0	0	0	1	1	15	0	0	0	0	0	0	0	0	0	999
0741910	23-APR-14	26-APR-14	7.2	26-APR-14	71	26-APR-14	137	26-APR-14	0.57	26-APR-14	1.4	24-APR-14	84	24-APR-14	57	24-APR-14	111	24-APR-14	2.9	24-APR-14	1.22		0.336472	0.336472	0.198851	0.198851	1	-0.562119	19.499	19.499	19.499	19	1	1	0	0	1	1	3	0	0	0	0	0	1	0	0	0	999
2107484	19-NOV-11	19-NOV-11	6.2	08-SEP-14	146	08-SEP-14	143	08-SEP-14	0.75	08-SEP-14	1.4	08-SEP-14	72	08-SEP-14	81	08-SEP-14	127	08-SEP-14	4.1	08-SEP-14	1.16	Y	0.336472	0.336472	0.14842	0.14842	1	-0.287682	18.9342	18.9342	14.7631	15	1	0	0	0	1	1	2	0	0	0	0	0	0	1	1	0	1
0306040	19-AUG-14	22-AUG-14	5.2	15-NOV-15	74	15-NOV-15	135	15-NOV-15	1.23	15-NOV-15	9999999	23-JUL-15	59	23-SEP-14	47	23-SEP-14	80	23-SEP-14	3.2	23-SEP-14	1.32		16.1181	16.1181	0.277632	0.277632	0.207014	0.207014	72.447	40	40	40	1	0	0	0	1	3	19	0	1	0	0	0	1	0	1	0	999
0953642	28-APR-15	08-MAY-15	6.1	18-MAR-16	121	18-MAR-16	136	18-MAR-16	0.62	18-MAR-16	9999999	18-MAR-16	27	18-MAR-16	16	18-MAR-16	112	18-MAR-16	3	29-DEC-15	1.23	Y	16.1181	16.1181	0.207014	0.207014	1	-0.478036	79.245	40	40	40	2	0	1	0	0	6	84	2	2	0	0	0	1	0	0	0	999
1427399	11-MAR-14	19-MAR-14	10.6	03-MAR-16	9999999	03-MAR-16	135	03-MAR-16	0.6	03-MAR-16	4.3	03-MAR-16	77	03-MAR-16	35	03-MAR-16	731	03-MAR-16	1.4	10-DEC-15	1.23	Y	1.45862	1.45862	0.207014	0.207014	1	-0.510826	23.8321	23.8321	24.8992	25	1	1	0	1	1	9	110	3	3	0	0	1	1	0	1	0	999
0207621	26-MAY-15	23-JUN-15	4.7	18-AUG-16	161	18-AUG-16	138	04-JUN-16	0.65	04-JUN-16	9999999	02-JUN-16	69	05-AUG-15	28	05-AUG-15	123	05-AUG-15	2.8	05-AUG-15	1.13	Y	16.1181	16.1181	0.122218	0.122218	1	-0.430783	78.2952	40	40	40	1	1	1	0	1	4	43	1	0	0	0	0	0	0	0	0	999
2024846	04-MAR-10	08-MAR-10	6.5	08-MAR-10	72	08-MAR-10	137	08-MAR-10	0.58	08-MAR-10	3.3	08-MAR-10	675	08-MAR-10	623	08-MAR-10	125	08-MAR-10	2	08-MAR-10	1.34	Y	1.19392	1.19392	0.29267	0.29267	1	-0.544727	23.7909	23.7909	23.7909	24	2	1	1	0	0	3	25	0	1	1	0	0	0	1	0	0	1
1593211	29-FEB-12	02-MAR-12	6.8	02-MAR-12	104	02-MAR-12	146	26-MAR-12	1.48	02-MAR-12	1.8	29-FEB-12	72	29-FEB-12	30	29-FEB-12	78	29-FEB-12	1.8	29-FEB-12	> 11.50		0.587787	0.587787	#VALUE!	#VALUE!	0.392042	0.392042	#VALUE!	#VALUE!	#VALUE!	#VALUE!	0	1	0	0	1	2	4	0	0	0	0	0	1	0	0	0	999
8180727	31-MAY-12	03-JUN-12	3.4	23-APR-13	103	23-APR-13	137	23-APR-13	1.18	23-APR-13	3.7	21-MAR-13	56	21-MAR-13	32	21-MAR-13	71	21-MAR-13	2.5	21-MAR-13	1.14	Y	1.30833	1.30833	0.131028	0.131028	0.165514	0.165514	14.427	14.427	14.427	14	1	0	1	0	0	4	15	1	0	0	0	0	0	0	1	0	999
1063738	18-JUN-13	21-JUN-13	5.8	21-JUN-13	141	21-JUN-13	129	21-JUN-13	1.25	21-JUN-13	0.8	21-JUN-13	21	21-JUN-13	11	21-JUN-13	89	21-JUN-13	3.5	21-JUN-13	1.31	Y	1	-0.223144	0.270027	0.270027	0.223144	0.223144	15.3698	15.3698	21.8722	22	1	0	0	0	1	1	3	0	0	0	0	0	0	1	1	0	999
2301387	31-MAR-14	05-APR-14	11.3	03-APR-14	51	03-APR-14	135	03-APR-14	0.6	03-APR-14	4.5	02-APR-14	94	02-APR-14	46	02-APR-14	126	02-APR-14	1.7	02-APR-14	1.54		1.50408	1.50408	0.431782	0.431782	1	-0.510826	26.5214	26.5214	27.411	27	0	0	0	1	1	1	5	0	0	0	1	0	0	1	1	0	1
2294796	14-FEB-14	09-APR-14	13.9	22-MAY-14	9999999	22-MAY-14	122	22-MAY-14	3.87	22-MAY-14	14.9	22-MAY-14	93	22-MAY-14	39	22-MAY-14	163	22-MAY-14	1	22-MAY-14	1.94	Y	2.70136	2.70136	0.662688	0.662688	1.35325	1.35325	37.0139	37.0139	38.492	38	1	0	0	0	1	2	60	1	0	0	0	0	1	1	1	0	1
2292789	03-APR-15	16-APR-15	5.4	16-APR-15	88	16-APR-15	133	16-APR-15	0.89	16-APR-15	9999999	15-APR-15	67	04-APR-15	54	04-APR-15	124	04-APR-15	1.7	15-APR-15	1.30	Y	16.1181	16.1181	0.262364	0.262364	1	-0.116534	79.8649	40	40	40	1	1	0	1	0	3	23	0	0	0	0	0	0	1	1	0	1
8112193	15-FEB-11	28-FEB-11	5	17-MAR-16	93	17-MAR-16	140	17-MAR-16	1.04	17-MAR-16	1.4	17-MAR-16	41	17-MAR-16	25	17-MAR-16	88	17-MAR-16	3.8	17-SEP-15	1.17	Y	0.336472	0.336472	0.157004	0.157004	0.0392207	0.0392207	9.83565	9.83565	6.84938	7	1	0	0	0	1	4	21	0	1	0	0	0	1	0	0	0	999
2136336	31-AUG-15	02-SEP-15	4.2	02-SEP-15	132	02-SEP-15	134	02-SEP-15	131.94	02-SEP-15	5.3	31-AUG-15	175	31-AUG-15	69	31-AUG-15	131	31-AUG-15	1.4	31-AUG-15	1.52		1.66771	1.66771	0.41871	0.41871	4.88235	4.88235	64.1476	40	40	40	1	0	0	0	1	2	4	0	0	0	0	0	1	0	1	0	999
7120098	27-NOV-15	01-DEC-15	15.1	30-NOV-15	9999999	30-NOV-15	137	30-NOV-15	0.72	30-NOV-15	0.5	30-NOV-15	17	30-NOV-15	9	30-NOV-15	150	30-NOV-15	1.6	30-NOV-15	1.34	Y	1	-0.693147	0.29267	0.29267	1	-0.328504	23.0579	23.0579	23.0579	23	2	0	0	0	0	1	4	0	0	0	0	0	0	0	1	1	999
1329945	10-FEB-10	12-FEB-10	11.8	11-FEB-10	171	11-FEB-10	134	11-FEB-10	0.5	11-FEB-10	1.2	11-FEB-10	33	11-FEB-10	20	11-FEB-10	196	11-FEB-10	9999999	11-FEB-10	1.05		0.182322	0.182322	0.0487902	0.0487902	1	-0.693147	17.2356	17.2356	19.4893	19	1	1	1	0	1	1	2	0	0	0	1	0	0	0	0	0	999
0797666	01-MAR-10	03-MAR-10	7.5	08-APR-10	141	08-APR-10	125	08-APR-10	0.66	08-APR-10	9999999	02-MAR-10	140	01-MAR-10	36	01-MAR-10	117	01-MAR-10	9999999	02-MAR-10	1.12	Y	16.1181	16.1181	0.113329	0.113329	1	-0.415515	78.1957	40	40	40	3	0	0	0	1	1	2	0	0	0	0	0	0	0	1	0	999
0436067	08-APR-11	11-APR-11	6.7	11-APR-11	9999999	11-APR-11	139	11-APR-11	7.39	11-APR-11	24.8	11-APR-11	53	11-APR-11	39	11-APR-11	77	11-APR-11	2	11-APR-11	1.48	Y	3.21084	3.21084	0.392042	0.392042	2.00013	2.00013	42.0991	40	40	40	1	0	0	0	1	3	9	1	0	0	0	0	1	1	1	0	1
0280134	12-SEP-12	14-SEP-12	21.7	27-SEP-12	9999999	27-SEP-12	140	27-SEP-12	2.55	27-SEP-12	9999999	26-SEP-12	46	19-SEP-12	44	19-SEP-12	245	19-SEP-12	2.4	19-SEP-12	1.67	Y	16.1181	16.1181	0.512824	0.512824	0.936093	0.936093	82.0584	40	40	40	1	0	0	0	0	6	17	4	0	0	1	0	1	0	0	0	999
1310099	07-DEC-13	13-DEC-13	15.1	27-JAN-14	160	27-JAN-14	132	27-JAN-14	1.71	27-JAN-14	9999999	20-JAN-14	21	09-JAN-14	14	09-JAN-14	124	09-JAN-14	3.5	09-JAN-14	3.83	Y	16.1181	16.1181	1.34286	1.34286	0.536493	0.536493	87.5307	40	40	40	1	1	1	1	0	8	72	5	0	0	1	0	0	0	1	0	999
0540220	03-MAY-14	24-JUN-14	6.7	05-JUL-15	110	05-JUL-15	140	05-JUL-15	0.93	05-JUL-15	1.2	14-JUL-14	27	14-JUL-14	14	14-JUL-14	130	14-JUL-14	2.1	14-JUL-14	1.15		0.182322	0.182322	0.139762	0.139762	1	-0.0725707	18.2545	18.2545	16.1017	16	1	1	1	1	1	6	72	1	2	0	0	0	1	0	1	0	999
2264146	14-JUL-14	16-JUL-14	6.1	10-SEP-14	72	10-SEP-14	129	18-MAR-15	0.77	10-SEP-14	1.4	10-SEP-14	29	10-SEP-14	20	10-SEP-14	89	10-SEP-14	2.8	10-SEP-14	1.22		0.336472	0.336472	0.198851	0.198851	1	-0.261365	19.499	19.499	24.9113	25	2	0	0	1	1	2	3	1	0	0	0	0	0	1	1	0	1
0897589	18-FEB-15	21-FEB-15	7	24-AUG-15	142	24-AUG-15	141	11-MAY-16	0.66	11-MAY-16	1.3	24-AUG-15	35	24-AUG-15	23	24-AUG-15	97	24-AUG-15	3.9	24-AUG-15	1.16	Y	0.262364	0.262364	0.14842	0.14842	1	-0.415515	18.654	18.654	15.8364	16	1	0	0	0	1	4	15	0	2	0	0	0	1	1	1	0	1
2196184	12-JUN-14	16-JUN-14	5.1	31-AUG-15	134	31-AUG-15	140	31-AUG-15	0.95	31-AUG-15	9999999	31-AUG-15	45	31-AUG-15	32	31-AUG-15	95	31-AUG-15	3.5	31-AUG-15	1.01		16.1181	16.1181	0.00995033	0.00995033	1	-0.0512933	77.0378	40	40	40	1	0	0	0	1	1	4	0	0	0	0	0	0	0	1	0	999
8184809	08-OCT-10	26-OCT-10	12.9	25-OCT-10	9999999	25-OCT-10	148	25-OCT-10	2.63	25-OCT-10	3.6	23-OCT-10	94	23-OCT-10	46	23-OCT-10	52	23-OCT-10	2.9	23-OCT-10	1.39	Y	1.28093	1.28093	0.329304	0.329304	0.966984	0.966984	24.2142	24.2142	18.4839	18	0	1	0	0	1	3	22	1	0	0	1	0	1	1	1	0	1
2113005	08-MAR-12	11-MAR-12	3.9	11-MAR-12	99	11-MAR-12	131	11-MAR-12	536	11-MAR-12	2	11-MAR-12	54	11-MAR-12	27	11-MAR-12	73	11-MAR-12	2.3	11-MAR-12	1.22		0.693147	0.693147	0.198851	0.198851	6.28413	6.28413	71.4164	40	40	40	0	0	0	0	1	1	3	0	0	0	0	0	1	0	1	0	999
1067343	20-APR-12	29-APR-12	9.1	28-APR-12	9999999	28-APR-12	145	28-APR-12	8.13	28-APR-12	27.3	28-APR-12	109	28-APR-12	34	28-APR-12	77	28-APR-12	2.9	28-APR-12	2.54	Y	3.30689	3.30689	0.932164	0.932164	2.09556	2.09556	49.4248	40	40	40	1	0	0	0	0	1	9	0	0	0	1	0	1	1	1	0	1
2066518	17-NOV-11	18-NOV-11	5.1	03-MAY-12	9999999	03-MAY-12	139	03-MAY-12	0.7	03-MAY-12	0.9	03-MAY-12	32	03-MAY-12	27	03-MAY-12	74	03-MAY-12	4	03-MAY-12	1.21	Y	1	-0.105361	0.19062	0.19062	1	-0.356675	21.9149	21.9149	20.7213	21	1	1	0	0	1	6	13	3	1	0	0	0	1	0	0	0	999
0891576	01-DEC-12	03-DEC-12	5.2	03-DEC-12	49	03-DEC-12	137	03-DEC-12	0.92	03-DEC-12	2.7	02-DEC-12	82	02-DEC-12	54	02-DEC-12	121	02-DEC-12	2.6	02-DEC-12	1.10		0.993252	0.993252	0.0953102	0.0953102	1	-0.0833816	20.822	20.822	20.822	21	1	1	0	1	1	1	2	0	0	0	0	0	0	0	0	0	999
1507698	12-NOV-11	13-NOV-11	6	08-SEP-14	135	08-SEP-14	138	08-SEP-14	0.48	08-SEP-14	2.3	08-SEP-14	64	08-SEP-14	86	08-SEP-14	319	08-SEP-14	3.6	08-SEP-14	1.10	Y	0.832909	0.832909	0.0953102	0.0953102	1	-0.733969	20.2159	20.2159	19.563	20	1	0	0	0	0	8	34	3	1	0	0	0	1	1	1	0	0
0499924	20-DEC-13	27-DEC-13	10.8	27-DEC-13	9999999	27-DEC-13	138	27-DEC-13	2.91	27-DEC-13	6.9	27-DEC-13	255	27-DEC-13	70	27-DEC-13	44	27-DEC-13	3.7	27-DEC-13	3.44	Y	1.93152	1.93152	1.23547	1.23547	1.06815	1.06815	37.7907	37.7907	37.7177	38	1	0	0	1	1	4	23	2	1	0	0	1	1	0	1	0	999
0155013	28-APR-14	30-APR-14	4	30-APR-14		30-APR-14	138	30-APR-14	0.56	30-APR-14	9999999	28-APR-14	96	28-APR-14	69	28-APR-14	145	28-APR-14	3.2	28-APR-14	1.29		16.1181	16.1181	0.254642	0.254642	1	-0.579818	79.7784	40	40	40	2	0	0	0	1	2	4	0	0	0	0	0	1	0	0	0	999
7008339	28-AUG-14	26-SEP-14	10.5	25-SEP-14	217	25-SEP-14	131	25-SEP-14	0.7	25-SEP-14	1.9	22-SEP-14	54	22-SEP-14	31	22-SEP-14	91	22-SEP-14	2	22-SEP-14	1.26	Y	0.641854	0.641854	0.231112	0.231112	1	-0.356675	21.0147	21.0147	24.7738	25	1	0	0	0	1	2	50	0	1	0	0	0	1	1	1	0	0
1267721	09-JUN-15	20-JUN-15	6.2	08-JUN-16	9999999	08-JUN-16	150	08-JUN-16	0.61	08-JUN-16	4.8	08-JUN-16	44	08-JUN-16	21	08-JUN-16	61	08-JUN-16	2.6	16-JUN-15	1.25	Y	1.56862	1.56862	0.223144	0.223144	1	-0.494296	24.4286	24.4286	17.7484	18	2	0	1	1	1	10	95	2	2	0	1	0	1	1	1	0	1
1695320	03-DEC-15	03-DEC-15	7.1	03-DEC-15	160	03-DEC-15	132	03-DEC-15	1.45	03-DEC-15	9999999	03-DEC-15	56	03-DEC-15	25	03-DEC-15	112	03-DEC-15	2.2	03-DEC-15	1.41	Y	16.1181	16.1181	0.34359	0.34359	0.371564	0.371564	74.7605	40	40	40	1	1	0	0	0	6	35	0	2	0	0	0	0	1	1	0	1
0599503	17-APR-15	19-APR-15	5	07-DEC-15	101	07-DEC-15	139	07-DEC-15	0.65	07-DEC-15	2.2	07-DEC-15	95	07-DEC-15	40	07-DEC-15	209	07-DEC-15	3.8	07-DEC-15	1.10	Y	0.788457	0.788457	0.0953102	0.0953102	1	-0.430783	20.0478	20.0478	18.731	19	1	0	0	1	1	3	9	0	0	0	0	0	1	1	1	0	1
1710467	26-NOV-10	01-DEC-10	8.6	01-DEC-10	123	01-DEC-10	131	01-DEC-10	0.95	01-DEC-10	9999999	26-NOV-10	45	15-OCT-10	31	15-OCT-10	142	15-OCT-10	2	28-NOV-10	1.26	Y	16.1181	16.1181	0.231112	0.231112	1	-0.0512933	79.5149	40	40	40	2	1	1	1	1	4	18	1	0	0	0	1	1	0	1	0	999
8480760	31-MAR-11	03-APR-11	27.2	20-JUN-11	9999999	20-JUN-11	134	20-JUN-11	1.87	20-JUN-11	1.9	19-JUN-11	271	19-JUN-11	44	19-JUN-11	202	19-JUN-11	1.5	19-JUN-11	1.58	Y	0.641854	0.641854	0.457425	0.457425	0.625938	0.625938	19.9696	19.9696	21.9526	22	1	1	0	0	1	2	16	0	1	0	1	0	0	0	0	0	999
8004670	11-DEC-11	18-JAN-12	8.3	17-JAN-12	56	17-JAN-12	136	17-JAN-12	3.88	17-JAN-12	17	17-JAN-12	73	17-JAN-12	20	17-JAN-12	72	17-JAN-12	2.7	17-JAN-12	1.64	Y	2.83321	2.83321	0.494696	0.494696	1.35584	1.35584	35.6555	35.6555	35.7989	36	1	0	0	0	1	2	38	0	0	0	0	1	1	0	0	0	999
1070171	20-APR-12	07-MAY-12	6.1	07-MAY-12	9999999	07-MAY-12	131	07-MAY-12	1.61	07-MAY-12	36.6	07-MAY-12	103	07-MAY-12	35	07-MAY-12	60	07-MAY-12	2.9	07-MAY-12	2.73	Y	3.60005	3.60005	1.0043	1.0043	0.476234	0.476234	35.8439	35.8439	36.6668	37	0	0	0	0	1	2	27	1	0	0	0	1	1	1	1	0	1
0663977	24-JUL-13	08-AUG-13	4.8	11-OCT-13	153	11-OCT-13	142	11-OCT-13	0.85	11-OCT-13	2.2	11-OCT-13	31	11-OCT-13	17	11-OCT-13	89	11-OCT-13	3.1	11-OCT-13	1.56	Y	0.788457	0.788457	0.444686	0.444686	1	-0.162519	23.9609	23.9609	21.3144	21	1	0	1	1	1	1	15	0	0	0	0	0	1	0	0	0	999
2306348	02-JUL-14	02-JUL-14	2.5	02-JUL-14	9999999	02-JUL-14	138	02-JUL-14	0.66	02-JUL-14	0.8	02-JUL-14	55	02-JUL-14	54	02-JUL-14	90	02-JUL-14	2.6	02-JUL-14	1.12		1	-0.223144	0.113329	0.113329	1	-0.415515	21.0493	21.0493	20.4239	20	1	0	0	0	1	1	2	0	0	0	0	0	0	1	1	0	1
8459583	27-NOV-13	02-DEC-13	2.7	22-SEP-14	159	22-SEP-14	140	12-APR-16	1.26	12-APR-16	0.8	30-DEC-15	18	30-DEC-15	16	30-DEC-15	47	30-DEC-15	4.1	30-DEC-15	0.98	Y	1	-0.223144	-0.0202027	-0.0202027	0.231112	0.231112	12.1955	12.1955	9.44282	9	1	0	0	0	1	15	90	5	6	1	0	0	1	1	1	0	1
0852853	14-SEP-15	24-SEP-15	10.1	24-SEP-15		05-OCT-15	133	24-SEP-15	1.9	24-SEP-15	5.8	23-SEP-15	532	23-SEP-15	48	23-SEP-15	533	23-SEP-15	9999999	23-SEP-15	2.10	Y	1.75786	1.75786	0.741937	0.741937	0.641854	0.641854	27.5269	27.5269	29.1734	29	2	1	0	0	0	1	10	0	0	0	1	0	0	0	1	0	999
1514249	14-NOV-15	16-NOV-15	4.4	01-JUN-16	98	01-JUN-16	138	17-FEB-16	0.73	17-FEB-16	9999999	03-JUN-16	49	01-JUN-16	44	01-JUN-16	71	01-JUN-16	3.5	10-DEC-15	1.21		16.1181	16.1181	0.19062	0.19062	1	-0.314711	79.0613	40	40	40	1	2	0	0	0	2	6	0	0	0	0	0	1	0	0	0	999
1051745	17-NOV-14	04-DEC-14	7.9	19-NOV-15	9999999	19-NOV-15	134	18-NOV-15	1.37	18-NOV-15	3.3	18-NOV-15	45	18-NOV-15	20	18-NOV-15	109	18-NOV-15	1.6	18-NOV-15	1.56	Y	1.19392	1.19392	0.444686	0.444686	0.314811	0.314811	18.9362	18.9362	21.0216	21	1	0	0	0	1	4	36	1	0	0	0	0	1	0	1	0	999
2016041	04-MAR-10	08-MAR-10	8.5	08-MAR-10	109	08-MAR-10	137	08-MAR-10	0.9	08-MAR-10	9999999	04-MAR-10	51	04-MAR-10	24	04-MAR-10	83	04-MAR-10	2.1	04-MAR-10	1.77		16.1181	16.1181	0.57098	0.57098	1	-0.105361	83.3214	40	40	40	0	0	0	0	1	1	4	0	0	0	0	0	1	0	1	0	999
2069020	25-FEB-11	08-MAR-11	9.8	06-MAR-11	9999999	06-MAR-11	136	06-MAR-11	4.16	06-MAR-11	2.5	06-MAR-11	21	06-MAR-11	20	06-MAR-11	89	06-MAR-11	2	06-MAR-11	1.84	Y	0.916291	0.916291	0.609766	0.609766	1.42552	1.42552	30.3651	30.3651	30.6831	31	0	0	1	0	0	1	11	0	0	0	1	0	1	0	0	0	999
0742263	10-AUG-11	16-AUG-11	7.8	16-AUG-11	152	16-AUG-11	131	16-AUG-11	0.74	16-AUG-11	1.7	16-AUG-11	76	16-AUG-11	35	16-AUG-11	157	16-AUG-11	1.2	16-AUG-11	1.51		0.530628	0.530628	0.41211	0.41211	1	-0.301105	22.6214	22.6214	26.0624	26	2	0	0	0	1	3	17	1	0	0	0	0	1	1	0	0	1
0256740	10-AUG-11	17-AUG-11	8.4	17-AUG-11	49	17-AUG-11	138	17-AUG-11	0.66	17-AUG-11	1.5	17-AUG-11	94	17-AUG-11	44	17-AUG-11	164	17-AUG-11	1.3	17-AUG-11	1.57	Y	0.405465	0.405465	0.451076	0.451076	1	-0.415515	22.5847	22.5847	22.01	22	1	1	1	0	1	1	7	0	0	0	0	0	1	0	0	0	999
1909091	27-OCT-11	03-NOV-11	10.4	19-JAN-12	111	19-JAN-12	134	20-JAN-12	2.44	20-JAN-12	9999999	02-JAN-12	61	02-JAN-12	55	02-JAN-12	193	02-JAN-12	1.7	02-JAN-12	1.22	Y	16.1181	16.1181	0.198851	0.198851	0.891998	0.891998	78.12	40	40	40	1	1	1	0	1	4	44	2	1	0	0	0	1	1	0	0	999
2060872	17-JUN-11	21-JUN-11	9.7	08-JAN-12	9999999	08-JAN-12	142	08-JAN-12	0.99	08-JAN-12	41.7	08-JAN-12	287	08-JAN-12	92	08-JAN-12	52	08-JAN-12	2.1	08-JAN-12	2.90	Y	3.7305	3.7305	1.06471	1.06471	1	-0.0100503	42.0261	40	40	40	1	0	0	0	1	2	21	0	0	0	0	0	1	1	1	0	1
1713312	30-JAN-13	03-FEB-13	6.5	13-FEB-13	46	13-FEB-13	136	13-FEB-13	4.35	13-FEB-13	4.5	13-FEB-13	51	13-FEB-13	57	13-FEB-13	402	13-FEB-13	1.7	13-FEB-13	1.27	Y	1.50408	1.50408	0.239017	0.239017	1.47018	1.47018	28.862	28.862	29.2295	29	0	1	0	0	1	1	4	0	0	0	0	0	1	0	1	0	999
0338421	20-FEB-13	24-FEB-13	22.7	24-FEB-13	9999999	24-FEB-13	147	24-FEB-13	2.93	24-FEB-13	21.3	24-FEB-13	5985	24-FEB-13	1103	24-FEB-13	249	24-FEB-13	1.9	24-FEB-13	> 11.50	Y	3.05871	3.05871	#VALUE!	#VALUE!	1.075	1.075	#VALUE!	#VALUE!	#VALUE!	#VALUE!	1	0	0	0	1	1	4	0	0	0	1	0	1	0	1	1	999
0885394	01-APR-13	09-APR-13	4.4	29-MAY-13	118	29-MAY-13	135	29-MAY-13	3.32	29-MAY-13	1	01-APR-13	15	01-APR-13	11	01-APR-13	104	01-APR-13	2.1	04-APR-13	1.14	Y	0	0	0.131028	0.131028	1.19996	1.19996	19.3812	19.3812	20.742	21	1	1	1	0	0	1	8	0	0	0	0	0	0	0	1	0	999
0302477	27-AUG-13	06-SEP-13	5.8	05-SEP-13	9999999	05-SEP-13	144	05-SEP-13	1.61	05-SEP-13	11.9	05-SEP-13	200	05-SEP-13	52	05-SEP-13	88	05-SEP-13	1.3	05-SEP-13	1.69	Y	2.47654	2.47654	0.524729	0.524729	0.476234	0.476234	26.2258	26.2258	23.044	23	3	1	1	0	1	1	10	0	0	0	0	0	1	0	1	0	999
0272570	19-NOV-12	22-NOV-12	3.5	19-NOV-13	120	19-NOV-13	138	19-NOV-13	1.15	19-NOV-13	9999999	17-NOV-13	53	17-NOV-13	30	17-NOV-13	104	17-NOV-13	2	17-NOV-13	1.18	Y	16.1181	16.1181	0.165514	0.165514	0.139762	0.139762	70.5477	40	40	40	2	0	0	0	1	3	8	0	0	0	0	0	0	1	1	0	1
1772195	09-NOV-08	18-NOV-08	8.4	22-JUL-14	9999999	22-JUL-14	133	22-JUL-14	0.55	22-JUL-14	9999999	15-JUL-14	50	15-JUL-14	29	15-JUL-14	85	15-JUL-14	3.2	15-JUL-14	1.34		16.1181	16.1181	0.29267	0.29267	1	-0.597837	80.2043	40	40	40	3	1	0	1	1	5	26	0	1	0	0	0	0	0	0	0	999
1546538	23-APR-14	02-MAY-14	8	08-AUG-14	9999999	08-AUG-14	140	08-AUG-14	2.73	08-AUG-14	0.6	08-AUG-14	26	08-AUG-14	16	08-AUG-14	327	08-AUG-14	3.9	08-AUG-14	1.02	Y	1	-0.510826	0.0198026	0.0198026	1.0043	1.0043	20.043	20.043	18.0672	18	1	1	1	1	0	3	60	1	1	1	0	1	1	1	1	0	1
1401508	16-OCT-14	27-OCT-14	18.4	27-OCT-14	9999999	27-OCT-14	138	27-OCT-14	1.45	27-OCT-14	3.1	27-OCT-14	77	27-OCT-14	31	27-OCT-14	151	27-OCT-14	2.3	27-OCT-14	2.21		1.1314	1.1314	0.792993	0.792993	0.371564	0.371564	23.1441	23.1441	22.5878	23	1	0	0	0	0	1	11	0	0	0	1	0	1	1	1	0	1
7060048	17-MAR-15	25-MAR-15	11.4	31-MAR-15	96	31-MAR-15	132	31-MAR-15	0.85	31-MAR-15	7.3	31-MAR-15	67	31-MAR-15	43	31-MAR-15	106	31-MAR-15	2.8	31-MAR-15	1.79	Y	1.98787	1.98787	0.582216	0.582216	1	-0.162519	30.035	30.035	31.6792	32	1	0	0	0	1	1	8	0	0	0	0	0	1	0	1	0	999
1484305	21-SEP-11	27-SEP-11	8.1	14-AUG-15	200	14-AUG-15	136	14-AUG-15	1.09	14-AUG-15	0.8	09-AUG-15	42	09-AUG-15	20	09-AUG-15	53	09-AUG-15	3.1	09-AUG-15	2.24	Y	1	-0.223144	0.806476	0.806476	0.0861777	0.0861777	20.0673	20.0673	20.725	21	1	1	1	0	1	8	46	1	2	0	0	0	0	0	0	0	999
0952716	08-NOV-15	10-NOV-15	8.7	16-AUG-16	9999999	16-AUG-16	136	16-AUG-16	0.67	16-AUG-16	4.2	16-AUG-16	80	16-AUG-16	36	16-AUG-16	322	16-AUG-16	2.3	08-NOV-15	1.13	Y	1.43508	1.43508	0.122218	0.122218	1	-0.400478	22.7935	22.7935	23.3613	23	2	0	0	0	1	5	21	2	0	1	0	0	1	1	0	0	0
2051620	08-OCT-10	09-OCT-10	5.6	13-MAY-13	194	13-MAY-13	138	13-MAY-13	1.23	13-MAY-13	1.1	23-SEP-10	19	23-SEP-10	12	23-SEP-10	122	23-SEP-10	3	01-NOV-10	1.04		0.0953102	0.0953102	0.0392207	0.0392207	0.207014	0.207014	9.21067	9.21067	8.19462	8	1	0	0	1	1	2	4	1	0	0	0	0	0	0	0	0	999
1938042	31-JUL-11	03-AUG-11	7.1	03-AUG-11	85	03-AUG-11	131	03-AUG-11	0.89	03-AUG-11	28.4	03-AUG-11	59	03-AUG-11	34	03-AUG-11	75	03-AUG-11	3	03-AUG-11	2.87	Y	3.34639	3.34639	1.05431	1.05431	1	-0.116534	40.4576	40	40	40	2	0	0	0	0	1	3	0	0	0	0	0	1	1	1	0	1
0110012	30-APR-12	23-MAY-12	10.2	19-MAY-12	9999999	19-MAY-12	125	19-MAY-12	3.77	19-MAY-12	10.2	16-MAY-12	81	16-MAY-12	34	16-MAY-12	76	16-MAY-12	3.3	19-MAY-12	1.80		2.32239	2.32239	0.587787	0.587787	1.32708	1.32708	34.4919	34.4919	36.6731	37	1	0	0	0	1	1	23	0	0	0	1	0	1	0	0	0	999
0139941	05-AUG-14	15-AUG-14	3.5	15-AUG-14	51	15-AUG-14	134	15-AUG-14	0.66	15-AUG-14	5.4	06-AUG-14	39	06-AUG-14	25	06-AUG-14	68	06-AUG-14	2	06-AUG-14	1.95	Y	1.6864	1.6864	0.667829	0.667829	1	-0.415515	29.8543	29.8543	30.8587	31	2	0	0	0	1	1	10	0	0	0	0	0	1	0	0	0	999
0410974	14-SEP-14	17-SEP-14	6.6	15-JUN-15	104	15-JUN-15	136	15-JUN-15	0.74	15-JUN-15	9999999	15-JUN-15	41	17-SEP-14	21	17-SEP-14	135	17-SEP-14	1.9	17-SEP-14	1.19	Y	16.1181	16.1181	0.173953	0.173953	1	-0.301105	78.8747	40	40	40	2	0	0	0	1	1	3	0	0	0	0	0	1	1	1	0	999
0633541	07-OCT-15	14-OCT-15	5	25-MAY-16	66	25-MAY-16	138	25-MAY-16	0.81	25-MAY-16	2.2	25-MAY-16	60	25-MAY-16	44	25-MAY-16	88	25-MAY-16	1.4	29-OCT-15	1.86	Y	0.788457	0.788457	0.620576	0.620576	1	-0.210721	25.9308	25.9308	25.4665	25	2	0	0	0	0	4	28	1	0	0	0	0	1	1	1	0	1
1610804	02-NOV-15	05-NOV-15	8.3	05-NOV-15	106	05-NOV-15	134	05-NOV-15	1.1	05-NOV-15	30.8	05-NOV-15	360	05-NOV-15	199	05-NOV-15	90	05-NOV-15	1.8	05-NOV-15	1.50	Y	3.42751	3.42751	0.405465	0.405465	0.0953102	0.0953102	24.8393	24.8393	26.3402	26	1	0	1	0	0	1	3	0	0	0	0	0	1	1	1	0	1
1735552	08-JUL-10	23-JUL-10	6.8	23-JUL-10	9999999	23-JUL-10	135	23-JUL-10	3.87	23-JUL-10	9999999	18-JUL-10	36	16-JUL-10	23	16-JUL-10	56	16-JUL-10	3.6	16-JUL-10	1.74	Y	16.1181	16.1181	0.553885	0.553885	1.35325	1.35325	86.5106	40	40	40	1	0	0	0	1	1	15	0	0	0	0	0	1	0	0	0	999
1827736	03-JUL-10	07-JUL-10	5.8	02-AUG-10	55	02-AUG-10	134	02-AUG-10	5.71	02-AUG-10	2.4	02-AUG-10	26	02-AUG-10	24	02-AUG-10	149	02-AUG-10	1.6	02-AUG-10	2.84	Y	0.875469	0.875469	1.0438	1.0438	1.74222	1.74222	38.1029	38.1029	38.2907	38	0	0	1	0	1	1	4	0	0	0	0	0	0	0	1	0	999
0860381	06-SEP-10	07-SEP-10	9.5	20-NOV-11	95	20-NOV-11	127	22-NOV-11	0.98	22-NOV-11	16	28-NOV-11	151	28-NOV-11	61	28-NOV-11	190	28-NOV-11	1.5	28-NOV-11	1.93	Y	2.77259	2.77259	0.65752	0.65752	1	-0.0202027	33.8446	33.8446	35.8759	36	2	0	0	0	0	7	52	2	2	0	0	1	1	1	1	0	1
0279708	11-FEB-12	12-FEB-12	2.7	12-FEB-12	9999999	12-FEB-12	136	12-FEB-12	0.78	12-FEB-12	2.5	10-FEB-12	52	10-FEB-12	31	10-FEB-12	102	10-FEB-12	2.7	10-FEB-12	1.17		0.916291	0.916291	0.157004	0.157004	1	-0.248461	21.222	21.222	21.8417	22	1	0	0	0	1	1	1	0	0	0	0	0	1	1	0	0	999
0764655	01-JAN-13	07-JAN-13	8.4	15-AUG-14	251	15-AUG-14	135	15-AUG-14	1.04	15-AUG-14	0.8	15-AUG-14	46	15-AUG-14	32	15-AUG-14	72	15-AUG-14	4.2	15-AUG-14	1.03	Y	1	-0.223144	0.0295588	0.0295588	0.0392207	0.0392207	10.9164	10.9164	12.8359	13	2	1	0	0	1	1	6	0	0	0	0	0	0	0	0	0	999
2230466	01-APR-13	16-APR-13	25.2	21-MAY-13	9999999	21-MAY-13	140	21-MAY-13	5.83	21-MAY-13	8.9	21-MAY-13	35	21-MAY-13	7	21-MAY-13	94	21-MAY-13	2.1	21-MAY-13	2.23	Y	2.18605	2.18605	0.802002	0.802002	1.76302	1.76302	40.5478	40	40	40	1	0	0	0	1	4	42	3	0	0	1	0	1	0	1	0	999
0496830	18-FEB-14	22-FEB-14	8.3	28-APR-15	65	28-APR-15	131	28-APR-15	1.77	28-APR-15	1.7	28-APR-15	24	28-APR-15	13	28-APR-15	92	28-APR-15	2.9	28-APR-15	1.29		0.530628	0.530628	0.254642	0.254642	0.57098	0.57098	16.752	16.752	21.3551	21	1	1	0	0	1	1	4	0	0	0	0	0	1	1	1	0	999
1458074	11-DEC-12	15-DEC-12	5.7	03-AUG-16	78	03-AUG-16	137	03-AUG-16	0.82	03-AUG-16	9999999	03-AUG-16	42	03-AUG-16	31	03-AUG-16	128	03-AUG-16	2.7	04-AUG-15	1.47		16.1181	16.1181	0.385262	0.385262	1	-0.198451	81.2413	40	40	40	1	0	1	0	1	1	4	0	0	0	0	0	1	1	1	0	1
8145065	18-MAY-11	28-MAY-11	4.9	08-DEC-14	106	08-DEC-14	132	08-DEC-14	0.69	08-DEC-14	8.5	08-DEC-14	56	08-DEC-14	30	08-DEC-14	168	08-DEC-14	1.7	08-DEC-14	1.97	Y	2.14007	2.14007	0.678034	0.678034	1	-0.371064	31.6834	31.6834	33.0557	33	1	0	0	0	1	1	10	0	0	0	0	0	0	1	1	0	999
0754768	13-SEP-15	03-OCT-15	5.2	09-DEC-15	139	09-DEC-15	136	09-DEC-15	54.07	09-DEC-15	1.2	09-DEC-15	40	09-DEC-15	15	09-DEC-15	89	09-DEC-15	2.8	09-DEC-15	1.23	Y	0.182322	0.182322	0.207014	0.207014	3.99028	3.99028	47.6247	40	40	40	2	1	1	0	0	2	43	0	1	0	1	0	0	1	1	0	1
1477350	04-MAR-15	09-MAR-15	5.3	18-JAN-16	122	18-JAN-16	130	18-JAN-16	0.45	18-JAN-16	9999999	16-JAN-16	89	16-JAN-16	29	16-JAN-16	230	16-JAN-16	3.6	03-DEC-15	1.01	Y	16.1181	16.1181	0.00995033	0.00995033	1	-0.798508	77.0378	40	40	40	1	0	0	0	1	2	7	0	0	0	0	0	0	0	1	0	999
2092028	03-JAN-15	06-JAN-15	4.1	14-MAR-16	64	14-MAR-16	135	14-MAR-16	0.77	14-MAR-16	1.5	13-FEB-16	28	13-FEB-16	21	13-FEB-16	71	13-FEB-16	2.8	27-DEC-15	1.16	Y	0.405465	0.405465	0.14842	0.14842	1	-0.261365	19.195	19.195	20.5681	21	1	1	1	0	1	4	38	0	2	0	0	1	0	1	1	0	1
2046104	12-OCT-15	16-OCT-15	1.9	02-MAY-16	9999999	02-MAY-16	138	14-JUL-16	1.08	14-JUL-16	1.9	02-MAY-16	60	02-MAY-16	41	02-MAY-16	103	02-MAY-16	3	21-DEC-15	1.35	Y	0.641854	0.641854	0.300105	0.300105	0.076961	0.076961	12.9539	12.9539	12.0614	12	2	0	0	0	0	2	7	0	0	0	0	0	0	1	1	0	999
0983537	08-JAN-12	10-JAN-12	6.8	10-JAN-12	9999999	10-JAN-12	137	10-JAN-12	0.69	10-JAN-12	8.6	10-JAN-12	233	10-JAN-12	70	10-JAN-12	188	10-JAN-12	3.2	10-JAN-12	1.38	Y	2.15176	2.15176	0.322083	0.322083	1	-0.371064	27.741	27.741	27.741	28	1	0	0	0	1	6	44	2	2	0	0	0	1	1	1	0	1
2100224	05-JUL-12	20-JUL-12	7.6	18-JUL-12	9999999	18-JUL-12	140	18-JUL-12	2.43	18-JUL-12	10	18-JUL-12	41	18-JUL-12	22	18-JUL-12	61	18-JUL-12	3.9	18-JUL-12	1.73	Y	2.30259	2.30259	0.548121	0.548121	0.887891	0.887891	29.7699	29.7699	28.7571	29	2	0	0	0	0	1	15	0	0	0	0	0	0	1	1	0	999
0501720	15-OCT-12	31-OCT-12	10	30-OCT-12	101	30-OCT-12	130	30-OCT-12	2.53	30-OCT-12	33.9	30-OCT-12	45	30-OCT-12	18	30-OCT-12	41	30-OCT-12	2.4	30-OCT-12	1.61	Y	3.52342	3.52342	0.476234	0.476234	0.928219	0.928219	33.9654	33.9654	35.3594	35	2	0	1	1	1	1	16	0	0	0	1	0	0	1	1	0	999
1077395	10-NOV-12	18-NOV-12	28.5	17-NOV-12	150	17-NOV-12	130	17-NOV-12	3.8	17-NOV-12	9999999	17-NOV-12	180	17-NOV-12	53	17-NOV-12	175	17-NOV-12	3.8	17-NOV-12	2.70		16.1181	16.1181	0.993252	0.993252	1.335	1.335	91.2568	40	40	40	1	0	0	0	1	2	10	0	0	0	1	0	0	0	1	0	999
0420561	22-APR-13	03-MAY-13	7.7	28-MAY-13	9999999	28-MAY-13	135	28-MAY-13	0.58	28-MAY-13	5.6	28-MAY-13	649	28-MAY-13	155	28-MAY-13	127	28-MAY-13	3.5	28-MAY-13	4.32	Y	1.72277	1.72277	1.46326	1.46326	1	-0.544727	38.9005	38.9005	38.9731	39	1	1	1	1	1	3	23	2	0	0	1	0	1	1	0	0	1
0655915	01-SEP-13	06-SEP-13	12.9	04-SEP-13	44	04-SEP-13	137	04-SEP-13	1.94	04-SEP-13	21.9	04-SEP-13	664	04-SEP-13	185	04-SEP-13	254	04-SEP-13	3.1	04-SEP-13	1.74	Y	3.08649	3.08649	0.553885	0.553885	0.662688	0.662688	30.6424	30.6424	30.6424	31	1	0	1	0	0	1	5	0	0	0	1	0	1	1	0	0	999
2283800	01-DEC-13	11-DEC-13	8.6	27-AUG-14	9999999	27-AUG-14	137	27-AUG-14	0.82	27-AUG-14	17.9	27-AUG-14	40	27-AUG-14	27	27-AUG-14	144	27-AUG-14	1.6	27-AUG-14	2.05	Y	2.8848	2.8848	0.71784	0.71784	1	-0.198451	34.9444	34.9444	34.9444	35	2	0	0	0	1	3	24	1	0	0	0	0	0	1	1	0	1
7088127	06-JAN-16	11-JAN-16	6.4	11-JAN-16	231	11-JAN-16	140	11-JAN-16	0.98	11-JAN-16	9999999	26-JAN-16	31	08-JAN-16	21	08-JAN-16	49	08-JAN-16	3.9	28-JUL-15	1.04	Y	16.1181	16.1181	0.0392207	0.0392207	1	-0.0202027	77.3657	40	40	40	1	1	0	0	0	1	5	0	0	0	0	0	0	0	0	0	999
0945239	20-SEP-09	16-OCT-09	20	01-MAY-10	9999999	01-MAY-10	141	01-MAY-10	0.82	01-MAY-10	9999999	01-MAY-10	80	30-APR-10	40	30-APR-10	63	30-APR-10	2.7	30-APR-10	1.24	Y	16.1181	16.1181	0.215111	0.215111	1	-0.198451	79.3356	40	40	40	1	0	0	0	1	2	27	0	0	0	0	0	1	1	0	0	999
1927153	14-DEC-11	19-DEC-11	4.4	19-DEC-11	36	19-DEC-11	134	19-DEC-11	0.89	19-DEC-11	3.3	14-DEC-11	28	14-DEC-11	21	14-DEC-11	128	14-DEC-11	3	14-DEC-11	1.21	Y	1.19392	1.19392	0.19062	0.19062	1	-0.116534	22.648	22.648	24.3658	24	2	1	0	0	1	1	5	0	0	0	0	0	0	1	0	0	999
2193859	19-JUL-12	03-AUG-12	6.7	30-JUL-12	238	30-JUL-12	132	03-AUG-12	0.72	03-AUG-12	9999999	19-JUL-12	109	19-JUL-12	34	19-JUL-12	94	19-JUL-12	1.7	19-JUL-12	1.17		16.1181	16.1181	0.157004	0.157004	1	-0.328504	78.6848	40	40	40	0	0	1	0	0	1	15	0	0	0	0	0	1	0	1	0	999
1131969	26-SEP-10	01-OCT-10	3	25-FEB-13	9999999	25-FEB-13	135	25-FEB-13	1.1	25-FEB-13	9999999	25-FEB-13	105	24-FEB-13	69	24-FEB-13	64	24-FEB-13	4.1	24-FEB-13	1.14	Y	16.1181	16.1181	0.131028	0.131028	0.0953102	0.0953102	69.736	40	40	40	1	0	0	0	0	1	5	0	0	0	0	0	0	1	0	0	1
1314471	30-SEP-14	31-OCT-14	19	31-OCT-14	9999999	31-OCT-14	138	31-OCT-14	4.79	31-OCT-14	28.5	31-OCT-14	1416	31-OCT-14	635	31-OCT-14	67	31-OCT-14	1.4	31-OCT-14	4.02	Y	3.3499	3.3499	1.39128	1.39128	1.56653	1.56653	49.6667	40	40	40	1	0	1	0	1	1	30	0	0	0	1	0	1	0	0	0	999
1536186	17-JAN-14	24-JAN-14	12	28-DEC-14	9999999	28-DEC-14	133	28-DEC-14	0.66	28-DEC-14	11.4	28-DEC-14	110	28-DEC-14	45	28-DEC-14	69	28-DEC-14	2.8	28-DEC-14	1.73	Y	2.43361	2.43361	0.548121	0.548121	1	-0.415515	31.338	31.338	32.4814	32	1	1	1	0	1	3	15	0	0	0	0	0	1	1	0	0	1
8075237	21-FEB-14	03-MAR-14	5.3	17-MAR-15	9999999	17-MAR-15	143	17-MAR-15	0.54	17-MAR-15	2.3	17-MAR-15	166	17-MAR-15	47	17-MAR-15	147	17-MAR-15	3.5	17-MAR-15	1.42	Y	0.832909	0.832909	0.350657	0.350657	1	-0.616186	23.0758	23.0758	19.7248	20	1	1	0	0	1	5	32	2	1	0	0	0	0	0	1	0	999
0379021	26-APR-15	15-MAY-15	7.1	13-MAY-15	214	13-MAY-15	137	13-MAY-15	0.74	13-MAY-15	3.5	12-MAY-15	172	12-MAY-15	160	12-MAY-15	62	12-MAY-15	2.2	12-MAY-15	1.12	Y	1.25276	1.25276	0.113329	0.113329	1	-0.301105	22.0047	22.0047	22.0047	22	2	0	0	0	1	1	19	0	0	0	0	0	1	0	0	0	999
2030475	14-APR-10	18-APR-10	42.2	18-APR-10	9999999	18-APR-10	135.7	21-APR-10	2.3	18-APR-10	9.8	18-APR-10	535	18-APR-10	204	18-APR-10	99	18-APR-10	1.6	18-APR-10	2.69		2.28238	2.28238	0.989541	0.989541	0.832909	0.832909	34.1112	34.1112	34.3638	34	0	1	0	0	1	1	4	0	0	0	1	0	1	999	1	0	999
0438289	19-OCT-10	20-OCT-10	15.3	19-OCT-10	153	19-OCT-10	135	19-OCT-10	1.04	19-OCT-10	6.5	19-OCT-10	66	19-OCT-10	51	19-OCT-10	130	19-OCT-10	1.6	19-OCT-10	2.55	Y	1.8718	1.8718	0.936093	0.936093	0.0392207	0.0392207	24.365	24.365	25.3969	25	0	0	0	0	0	1	2	0	0	0	1	0	1	1	0	0	999
0477577	28-MAY-12	03-JUN-12	10.3	11-JUN-12	9999999	11-JUN-12	131	11-JUN-12	1.35	11-JUN-12	9999999	11-JUN-12	136	11-JUN-12	100	11-JUN-12	141	11-JUN-12	2.2	11-JUN-12	1.77	Y	16.1181	16.1181	0.57098	0.57098	0.300105	0.300105	76.6234	40	40	40	1	0	0	1	1	1	6	0	0	0	0	0	1	1	1	0	1
0737069	07-JUN-12	09-JUN-12	6.7	10-DEC-12	219	10-DEC-12	142	10-DEC-12	0.98	10-DEC-12	9999999	10-DEC-12	57	10-DEC-12	46	10-DEC-12	100	10-DEC-12	3.1	10-DEC-12	1.09		16.1181	16.1181	0.0861777	0.0861777	1	-0.0202027	77.8916	40	40	40	1	0	0	0	0	1	2	0	0	0	0	0	1	1	1	0	1
1326799	20-MAR-12	22-MAR-12	2.7	22-AUG-13	9999999	22-AUG-13	134	22-AUG-13	0.59	22-AUG-13	9999999	19-AUG-13	36	18-AUG-13	17	18-AUG-13	122	18-AUG-13	2.3	18-AUG-13	2.04		16.1181	16.1181	0.71295	0.71295	1	-0.527633	84.9114	40	40	40	0	0	0	0	0	2	6	0	0	0	0	0	1	1	1	0	1
1248218	15-JUN-14	16-JUN-14	8	15-AUG-16	146	15-AUG-16	141	15-AUG-16	15.76	15-AUG-16	1.1	15-NOV-15	25	15-NOV-15	24	15-NOV-15	122	15-NOV-15	2.9	15-NOV-15	1.05		0.0953102	0.0953102	0.0487902	0.0487902	2.75748	2.75748	33.7258	33.7258	32.8976	33	2	1	0	0	1	3	9	0	0	0	0	0	1	0	0	0	999
0855630	30-MAR-15	04-APR-15	2.8	03-DEC-15	53	03-DEC-15	140	03-DEC-15	0.88	03-DEC-15	1.5	03-DEC-15	24	03-DEC-15	20	03-DEC-15	56	03-DEC-15	3.7	03-DEC-15	1.19	Y	0.405465	0.405465	0.173953	0.173953	1	-0.127833	19.4809	19.4809	17.4495	17	1	0	0	0	0	1	5	0	0	0	0	0	0	1	0	0	1
1585337	02-MAY-15	04-MAY-15	13.9	02-MAY-15	73	02-MAY-15	132	03-MAY-15	3.92	03-MAY-15	17.3	03-MAY-15	69	03-MAY-15	35	03-MAY-15	105	03-MAY-15	1.6	03-MAY-15	2.00		2.85071	2.85071	0.693147	0.693147	1.36609	1.36609	38.0424	38.0424	38.3654	38	3	0	0	1	1	1	2	0	0	0	0	0	1	1	1	0	1
0662792	28-JUL-14	30-JUL-14	4.7	06-AUG-15	91	06-AUG-15	140	06-AUG-15	0.77	06-AUG-15	2.4	06-AUG-15	104	06-AUG-15	69	06-AUG-15	117	06-AUG-15	2.9	06-AUG-15	1.22	Y	0.875469	0.875469	0.198851	0.198851	1	-0.261365	21.5364	21.5364	19.7085	20	1	0	0	0	0	1	2	0	0	0	0	0	0	1	1	0	999
7084147	13-JUN-15	23-JUN-15	9.1	17-SEP-15	193	17-SEP-15	140	17-SEP-15	0.63	17-SEP-15	0.9	17-SEP-15	45	17-SEP-15	19	17-SEP-15	119	17-SEP-15	3.1	17-SEP-15	1.06	Y	1	-0.105361	0.0582689	0.0582689	1	-0.462035	20.4326	20.4326	18.4954	18	0	0	0	1	1	2	13	0	0	0	0	0	1	1	0	0	1
8108312	07-NOV-10	12-NOV-10	6.9	30-NOV-10	9999999	30-NOV-10	136	18-NOV-10	1.37	18-NOV-10	22.9	19-NOV-10	67	19-NOV-10	41	19-NOV-10	50	19-NOV-10	2.3	30-NOV-10	2.88	Y	3.13114	3.13114	1.05779	1.05779	0.314811	0.314811	33.1257	33.1257	33.3525	33	1	1	0	0	0	2	9	1	0	0	1	0	1	1	1	0	1
1294929	07-SEP-12	10-SEP-12	11.4	09-OCT-12	143	09-OCT-12	141	09-OCT-12	1.15	09-OCT-12	1.8	09-OCT-12	64	09-OCT-12	38	09-OCT-12	133	09-OCT-12	2.8	09-OCT-12	1.21	Y	0.587787	0.587787	0.19062	0.19062	0.139762	0.139762	12.1243	12.1243	8.44471	8	1	1	0	1	1	1	3	0	0	0	0	0	1	0	0	0	999
0894812	02-NOV-12	04-NOV-12	4	04-NOV-12	55	04-NOV-12	140	04-NOV-12	1.57	04-NOV-12	1.9	04-NOV-12	70	04-NOV-12	34	04-NOV-12	99	04-NOV-12	2.1	04-NOV-12	1.21	Y	0.641854	0.641854	0.19062	0.19062	0.451076	0.451076	15.3079	15.3079	12.8634	13	3	1	0	0	1	1	2	0	0	0	0	0	1	0	0	0	999
1109035	03-DEC-12	11-DEC-12	6.5	30-JAN-13	9999999	30-JAN-13	135	30-JAN-13	4.57	30-JAN-13	5.4	30-JAN-13	60	30-JAN-13	40	30-JAN-13	139	30-JAN-13	2.2	30-JAN-13	1.85	Y	1.6864	1.6864	0.615186	0.615186	1.51951	1.51951	34.2364	34.2364	34.6168	35	1	1	1	0	0	4	16	1	0	0	0	0	1	0	1	0	999
2000411	20-FEB-10	25-FEB-10	4.5	11-AUG-15	161	11-AUG-15	136	07-DEC-15	0.83	07-DEC-15	1.2	07-DEC-15	24	07-DEC-15	18	07-DEC-15	48	07-DEC-15	3.9	07-DEC-15	1.15	Y	0.182322	0.182322	0.139762	0.139762	1	-0.18633	18.2545	18.2545	18.9721	19	2	0	0	0	1	1	5	0	0	0	0	0	1	1	0	0	1
1196792	28-MAR-15	04-APR-15	18.9	04-APR-15	9999999	04-APR-15	129	04-APR-15	0.78	04-APR-15	13.5	04-APR-15	113	04-APR-15	58	04-APR-15	196	04-APR-15	1.8	04-APR-15	2.20	Y	2.60269	2.60269	0.788457	0.788457	1	-0.248461	34.6689	34.6689	36.0763	36	2	0	0	0	0	1	7	0	0	0	0	0	0	1	0	0	1
7096483	06-AUG-15	11-AUG-15	7.3	11-AUG-15	146	11-AUG-15	138	11-AUG-15	0.71	11-AUG-15	9.8	11-AUG-15	232	11-AUG-15	135	11-AUG-15	130	11-AUG-15	4.2	14-AUG-15	1.24		2.28238	2.28238	0.215111	0.215111	1	-0.34249	27.0367	27.0367	26.6089	27	1	0	0	0	1	1	5	0	0	0	0	0	0	0	1	0	999
0268830	23-AUG-15	28-AUG-15	2.5	29-MAR-16	51	29-MAR-16	132	29-MAR-16	1.1	29-MAR-16	9999999	27-MAR-16	29	27-MAR-16	17	27-MAR-16	128	27-MAR-16	1.7	23-AUG-15	1.34	Y	16.1181	16.1181	0.29267	0.29267	0.0953102	0.0953102	71.5464	40	40	40	2	1	0	1	1	7	42	3	1	0	1	0	1	1	1	0	1
2053957	06-JUL-15	08-JUL-15	4.4	15-AUG-16	9999999	15-AUG-16	137	14-AUG-16	1.41	14-AUG-16	9999999	10-AUG-16	45	10-AUG-16	17	10-AUG-16	251	10-AUG-16	2.7	25-NOV-15	1.17	Y	16.1181	16.1181	0.157004	0.157004	0.34359	0.34359	72.403	40	40	40	2	1	1	0	1	18	94	10	7	0	0	1	1	1	1	0	1
0493927	08-JUN-09	08-JUN-09	4.7	08-JUN-09	194	08-JUN-09	136	08-JUN-09	0.92	08-JUN-09	2.2	08-JUN-09	95	08-JUN-09	71	08-JUN-09	58	08-JUN-09	4.1	12-FEB-10	0.96		0.788457	0.788457	-0.040822	-0.040822	1	-0.0833816	18.5232	18.5232	19.2319	19	1	0	1	1	1	2	3	0	0	0	0	0	0	0	0	0	999
0990349	27-AUG-10	02-SEP-10	25.7	02-SEP-10	9999999	02-SEP-10	152	02-SEP-10	4.07	02-SEP-10	57.2	02-SEP-10	161	02-SEP-10	97	02-SEP-10	75	02-SEP-10	3.8	02-SEP-10	1.71	Y	4.04655	4.04655	0.536493	0.536493	1.40364	1.40364	41.1676	40	40	40	1	0	0	0	0	1	6	0	0	0	1	0	1	0	0	0	999
2001165	08-SEP-10	15-SEP-10	5	14-SEP-10	41	14-SEP-10	128	15-SEP-10	3.62	15-SEP-10	7.2	10-SEP-10	93	10-SEP-10	58	10-SEP-10	144	10-SEP-10	3.3	10-SEP-10	2.87	Y	1.97408	1.97408	1.05431	1.05431	1.28647	1.28647	38.0119	38.0119	38.6023	39	0	0	1	0	1	1	7	0	0	0	0	0	0	0	0	0	999
2048520	13-OCT-10	22-NOV-10	18.5	17-NOV-10	72	17-NOV-10	138	17-NOV-10	3.59	17-NOV-10	0.8	03-NOV-10	50	03-NOV-10	15	03-NOV-10	197	03-NOV-10	1.3	03-NOV-10	1.37	Y	1	-0.223144	0.314811	0.314811	1.27815	1.27815	25.9678	25.9678	25.5047	26	0	1	0	0	0	1	30	0	0	0	1	0	1	0	0	0	999
2119541	24-MAR-14	28-MAR-14	4.3	28-MAR-14	111	28-MAR-14	143	28-MAR-14	0.66	28-MAR-14	1.1	28-MAR-14	68	28-MAR-14	27	28-MAR-14	91	28-MAR-14	3.5	28-MAR-14	1.47		0.0953102	0.0953102	0.385262	0.385262	1	-0.415515	20.6752	20.6752	16.8489	17	0	0	0	0	1	1	4	0	0	0	0	0	1	0	0	0	999
0673309	15-JUL-14	30-JUL-14	11	26-JUL-14	65	26-JUL-14	118	27-JUL-14	0.95	27-JUL-14	11.1	26-JUL-14	77	26-JUL-14	43	26-JUL-14	114	26-JUL-14	2.6	26-JUL-14	1.90	Y	2.40695	2.40695	0.641854	0.641854	1	-0.0512933	32.287	32.287	37.1231	37	1	0	0	0	1	1	15	0	0	0	1	0	1	1	1	0	1
1550543	04-NOV-14	14-NOV-14	5.7	14-NOV-14	9999999	14-NOV-14	138	14-NOV-14	0.88	14-NOV-14	3.5	09-NOV-14	53	09-NOV-14	31	09-NOV-14	117	09-NOV-14	1.4	09-NOV-14	1.86		1.25276	1.25276	0.620576	0.620576	1	-0.127833	27.6859	27.6859	27.2795	27	1	0	0	1	1	1	10	0	0	0	0	0	1	0	1	0	999
0771943	12-NOV-14	26-NOV-14	5.3	26-NOV-14	60	26-NOV-14	142	26-NOV-14	1.48	26-NOV-14	7.2	26-NOV-14	111	26-NOV-14	41	26-NOV-14	199	26-NOV-14	4.1	26-NOV-14	1.50		1.97408	1.97408	0.405465	0.405465	0.392042	0.392042	22.1851	22.1851	19.2456	19	1	1	0	0	0	1	14	0	0	0	1	0	1	1	1	0	999
1255385	08-MAY-10	12-MAY-10	9	27-JAN-15	160	27-JAN-15	146	30-JAN-15	1.31	30-JAN-15	9999999	26-JAN-15	22	26-JAN-15	20	26-JAN-15	59	26-JAN-15	3.2	26-JAN-15	1.16	Y	16.1181	16.1181	0.14842	0.14842	0.270027	0.270027	71.6029	40	40	40	1	0	1	1	0	9	47	3	1	0	0	0	0	0	0	0	999
1352860	03-APR-15	07-APR-15	5.7	17-MAY-16	95	17-MAY-16	134	17-MAY-16	4.23	17-MAY-16	2.1	17-MAY-16	41	17-MAY-16	20	17-MAY-16	425	17-MAY-16	1.5	28-APR-15	1.24	Y	0.741937	0.741937	0.215111	0.215111	1.4422	1.4422	25.4456	25.4456	26.8865	27	2	1	0	0	1	1	4	0	0	0	0	0	1	1	1	0	1
1850275	08-AUG-15	15-AUG-15	5.5	06-APR-16	97	06-APR-16	137	06-APR-16	1.02	06-APR-16	2.4	06-APR-16	41	06-APR-16	28	06-APR-16	97	06-APR-16	3.5	31-OCT-15	1.09	Y	0.875469	0.875469	0.0861777	0.0861777	0.0198026	0.0198026	10.894	10.894	10.894	11	2	0	0	0	1	1	7	0	0	0	0	0	0	1	1	0	1
1060767	26-APR-15	01-MAY-15	9.1	29-JUL-16	145	29-JUL-16	139	29-JUL-16	8.77	29-JUL-16	0.7	31-DEC-15	36	31-DEC-15	23	29-JUL-16	125	29-JUL-16	3	31-DEC-15	1.16		1	-0.356675	0.14842	0.14842	2.17134	2.17134	32.652	32.652	32.167	32	1	0	1	0	1	4	23	1	0	0	1	0	0	0	1	0	999
0439775	04-MAY-10	11-MAY-10	3.4	11-MAY-10	58	11-MAY-10	136	11-MAY-10	1.06	11-MAY-10	10.3	11-MAY-10	53	11-MAY-10	26	11-MAY-10	60	11-MAY-10	2.8	11-MAY-10	2.36	Y	2.33214	2.33214	0.858662	0.858662	0.0582689	0.0582689	25.4201	25.4201	25.9013	26	1	0	0	0	1	1	7	0	0	0	0	0	0	1	1	0	1
1577936	02-FEB-10	07-FEB-10	5.7	27-AUG-10	9999999	27-AUG-10	131	27-AUG-10	1.83	27-AUG-10	1.7	24-AUG-10	95	24-AUG-10	85	24-AUG-10	183	24-AUG-10	2.5	24-AUG-10	1.56	Y	0.530628	0.530628	0.444686	0.444686	0.604316	0.604316	19.1996	19.1996	23.318	23	1	0	1	1	1	3	54	0	2	0	0	0	0	0	0	0	999
1150399	08-SEP-10	28-SEP-10	29.9	28-SEP-10	195	28-SEP-10	134	28-SEP-10	0.95	28-SEP-10	29.8	28-SEP-10	188	28-SEP-10	92	28-SEP-10	271	28-SEP-10	3.2	28-SEP-10	1.64		3.39451	3.39451	0.494696	0.494696	1	-0.0512933	34.3718	34.3718	34.929	35	1	0	0	1	1	1	20	0	0	0	0	0	0	0	1	0	999
1492121	16-MAY-11	25-MAY-11	11.6	21-MAY-11	232	21-MAY-11	136	21-MAY-11	0.79	21-MAY-11	9999999	21-MAY-11	1175	21-MAY-11	272	21-MAY-11	2070	21-MAY-11	2.1	21-MAY-11	1.14	Y	16.1181	16.1181	0.131028	0.131028	1	-0.235722	78.3939	40	40	40	1	1	0	0	1	1	9	0	0	0	1	0	0	0	0	0	999
2124017	25-MAR-12	31-MAR-12	5.8	22-NOV-12	88	22-NOV-12	138	22-NOV-12	0.87	22-NOV-12	1.7	17-NOV-12	90	17-NOV-12	43	17-NOV-12	131	17-NOV-12	2.9	17-NOV-12	1.18	Y	0.530628	0.530628	0.165514	0.165514	1	-0.139262	19.8595	19.8595	19.1949	19	1	1	0	0	1	2	11	0	0	0	0	0	1	1	1	0	1
2207299	19-OCT-12	20-NOV-12	6.9	20-NOV-12	97	20-NOV-12	128	20-NOV-12	0.7	20-NOV-12	3	19-NOV-12	60	19-NOV-12	25	19-NOV-12	159	19-NOV-12	2.5	19-NOV-12	1.57	Y	1.09861	1.09861	0.451076	0.451076	1	-0.356675	25.2048	25.2048	29.599	30	0	0	0	0	0	1	30	0	0	0	0	0	1	1	1	0	999
1335217	20-DEC-12	22-DEC-12	5.2	24-APR-16	118	24-APR-16	138	19-JUL-16	0.77	19-JUL-16	2.6	19-JUL-16	53	19-JUL-16	42	19-JUL-16	131	19-JUL-16	2.9	28-SEP-15	1.31	Y	0.955511	0.955511	0.270027	0.270027	1	-0.261365	22.6361	22.6361	22.0631	22	1	1	1	0	0	2	4	0	0	0	0	0	1	1	1	0	999
2304138	02-FEB-15	06-MAR-15	5.6	28-AUG-15		31-AUG-15	147	28-AUG-15	3.78	28-AUG-15	9999999	22-AUG-15	42	22-AUG-15	18	22-AUG-15	81	22-AUG-15	5	22-AUG-15	5.58	Y	16.1181	16.1181	1.71919	1.71919	1.32972	1.32972	99.3368	40	40	40	1	0	0	0	0	2	48	0	0	0	1	0	1	1	0	0	1
7091865	02-SEP-15	05-SEP-15	9.8	05-SEP-15	46	05-SEP-15	146	05-SEP-15	1.77	05-SEP-15	51.3	05-SEP-15	86	05-SEP-15	59	05-SEP-15	111	05-SEP-15	4.8	05-SEP-15	1.74	Y	3.93769	3.93769	0.553885	0.553885	0.57098	0.57098	32.9823	32.9823	30.898	31	1	0	0	0	1	1	3	0	0	0	1	0	1	0	0	0	999
2286872	07-OCT-14	09-OCT-14	4	24-SEP-15	70	24-SEP-15	133	24-SEP-15	1.08	24-SEP-15	1.3	24-SEP-15	39	24-SEP-15	21	24-SEP-15	207	24-SEP-15	3.7	24-SEP-15	1.25		0.262364	0.262364	0.223144	0.223144	0.076961	0.076961	10.6575	10.6575	14.5307	15	1	1	0	0	1	1	2	0	0	0	0	0	1	1	1	0	1
0240573	10-DEC-15	12-DEC-15	3.2	01-MAY-16	86	01-MAY-16	129	01-MAY-16	0.59	01-MAY-16	1.3	01-MAY-16	39	01-MAY-16	38	01-MAY-16	233	01-MAY-16	2.6	10-DEC-15	1.16		0.262364	0.262364	0.14842	0.14842	1	-0.527633	18.654	18.654	24.2894	24	1	1	0	0	1	4	12	1	2	0	0	0	1	1	1	0	999
1932973	17-DEC-15	22-DEC-15	1.5	25-JUN-16	9999999	25-JUN-16	136	25-JUN-16	0.67	25-JUN-16	9999999	25-JUN-16	34	25-JUN-16	33	25-JUN-16	300	25-JUN-16	1.9	22-DEC-15	1.31	Y	16.1181	16.1181	0.270027	0.270027	1	-0.400478	79.9507	40	40	40	1	1	0	0	1	5	22	1	1	0	1	0	1	0	0	0	999
1833972	28-JUN-12	31-JUL-12	1.3	30-JUL-12	9999999	30-JUL-12	140	27-JUL-12	3.19	27-JUL-12	1.1	27-JUL-12	36	27-JUL-12	19	27-JUL-12	31	27-JUL-12	3.3	27-JUL-12	1.98	Y	0.0953102	0.0953102	0.683097	0.683097	1.16002	1.16002	25.5424	25.5424	24.1111	24	1	0	0	0	0	1	30	0	0	0	0	0	1	1	1	0	1
2068967	23-JUL-12	23-JUL-12	12.8	08-AUG-12	9999999	08-AUG-12	131	08-AUG-12	0.66	08-AUG-12	9999999	01-AUG-12	86	01-AUG-12	31	01-AUG-12	153	01-AUG-12	9999999	05-AUG-12	1.70	Y	16.1181	16.1181	0.530628	0.530628	1	-0.415515	82.8694	40	40	40	2	0	0	0	1	2	7	1	0	0	0	0	0	1	1	0	1
0255033	18-JAN-12	30-JAN-12	13	10-MAY-15		10-MAY-15	146	10-MAY-15	1.57	10-MAY-15	9999999	05-MAY-15	77	05-MAY-15	50	05-MAY-15	72	05-MAY-15	3.5	05-MAY-15	1.10	Y	16.1181	16.1181	0.0953102	0.0953102	0.451076	0.451076	72.7407	40	40	40	2	1	1	0	0	5	31	0	1	0	1	0	1	1	0	0	999
2217039	27-SEP-13	07-OCT-13	4.9	07-MAY-15	130	07-MAY-15	132	07-MAY-15	0.67	07-MAY-15	9999999	07-MAY-15	56	07-MAY-15	15	07-MAY-15	79	07-MAY-15	3.5	07-MAY-15	1.21	Y	16.1181	16.1181	0.19062	0.19062	1	-0.400478	79.0613	40	40	40	1	0	0	0	1	4	23	0	1	0	0	0	1	0	1	0	999
1719665	12-MAR-13	19-MAR-13	9.8	30-JUN-15	9999999	30-JUN-15	133	30-JUN-15	2.99	30-JUN-15	1.7	30-JUN-15	105	30-JUN-15	28	30-JUN-15	68	30-JUN-15	1.5	30-JUN-15	1.56	Y	0.530628	0.530628	0.444686	0.444686	1.09527	1.09527	23.898	23.898	26.0235	26	1	0	1	0	1	7	105	3	1	0	1	0	1	1	1	0	1
1926288	14-JUL-15	15-JUL-15	3.8	14-JUL-15	9999999	14-JUL-15	137	15-JUL-15	2.1	15-JUL-15	3.3	15-JUL-15	64	15-JUL-15	24	15-JUL-15	45	15-JUL-15	2	15-JUL-15	1.39	Y	1.19392	1.19392	0.329304	0.329304	0.741937	0.741937	21.7316	21.7316	21.7316	22	2	0	0	0	1	1	1	0	0	0	1	0	1	0	1	0	999
1873540	19-SEP-14	28-SEP-14	10.3	23-FEB-16	164	23-FEB-16	132	23-FEB-16	4.33	23-FEB-16	1	23-FEB-16	18	23-FEB-16	18	23-FEB-16	741	23-FEB-16	3.2	16-JUL-15	1.05	Y	0	0	0.0487902	0.0487902	1.46557	1.46557	21.0019	21.0019	24.1366	24	1	1	0	0	0	3	16	0	1	1	0	0	1	0	0	0	999
0532930	28-OCT-10	17-NOV-10	5.8	04-JAN-11	164	04-JAN-11	130	04-JAN-11	1.3	04-JAN-11	0.5	04-JAN-11	21	04-JAN-11	9999999	04-JAN-11	39	04-JAN-11	2.7	04-JAN-11	1.15	Y	1	-0.693147	0.139762	0.139762	0.262364	0.262364	14.2862	14.2862	20.2261	20	2	1	0	0	1	3	24	2	0	0	0	0	0	0	0	0	999
0527925	21-MAR-11	05-APR-11	7.8	31-MAR-11	117	31-MAR-11	141	01-APR-11	2.21	01-APR-11	9999999	21-MAR-11	36	21-MAR-11	20	21-MAR-11	89	21-MAR-11	2.2	21-MAR-11	1.29	Y	16.1181	16.1181	0.254642	0.254642	0.792993	0.792993	77.7973	40	40	40	2	1	1	0	1	1	15	0	0	0	1	0	1	0	0	0	999
1293981	18-SEP-11	20-SEP-11	4.5	20-SEP-11	86	20-SEP-11	142	27-OCT-11	0.58	27-OCT-11	2.2	27-OCT-11	59	27-OCT-11	29	27-OCT-11	138	27-OCT-11	3.1	27-OCT-11	1.38		0.788457	0.788457	0.322083	0.322083	1	-0.544727	22.5877	22.5877	19.7147	20	2	0	0	0	0	1	2	0	0	0	0	0	1	0	0	0	999
8476754	22-MAY-10	29-MAY-10	2.7	26-JUN-15	9999999	26-JUN-15	139	26-JUN-15	0.51	26-JUN-15	0.5	26-JUN-15	35	26-JUN-15	29	26-JUN-15	151	26-JUN-15	3.2	26-JUN-15	1.17	Y	1	-0.693147	0.157004	0.157004	1	-0.673345	21.5384	21.5384	20.32	20	2	0	0	1	1	2	15	0	0	0	0	0	1	1	0	0	1
2022180	09-JUL-12	13-JUL-12	8.4	01-NOV-12	9999999	01-NOV-12	140	01-NOV-12	1.21	01-NOV-12	10.4	01-NOV-12	82	01-NOV-12	74	01-NOV-12	80	01-NOV-12	3.5	01-NOV-12	2.64	Y	2.34181	2.34181	0.970779	0.970779	0.19062	0.19062	27.979	27.979	26.7889	27	2	0	0	0	0	2	10	0	0	1	0	0	1	1	0	0	1
8215761	11-JAN-13	15-JAN-13	6.1	11-SEP-15	208	11-SEP-15	136	19-APR-16	1.14	19-APR-16	1.8	19-APR-16	28	19-APR-16	28	19-APR-16	57	19-APR-16	4.4	25-SEP-15	1.19		0.587787	0.587787	0.173953	0.173953	0.131028	0.131028	11.8541	11.8541	12.7829	13	1	1	1	0	1	2	4	1	0	0	0	0	0	0	0	0	999
1299720	17-FEB-13	04-MAR-13	19.2	04-MAR-13	9999999	04-MAR-13	137	04-MAR-13	1.57	04-MAR-13	13.4	04-MAR-13	106	04-MAR-13	34	04-MAR-13	73	04-MAR-13	2.8	04-MAR-13	2.27	Y	2.59525	2.59525	0.81978	0.81978	0.451076	0.451076	29.7384	29.7384	29.7384	30	1	0	0	0	1	1	15	0	0	0	1	0	0	0	0	0	999
2233830	22-JUL-13	07-AUG-13	4.5	25-NOV-13	9999999	25-NOV-13	141	25-NOV-13	1.65	25-NOV-13	9999999	22-NOV-13	14	11-NOV-13	9999999	11-NOV-13	95	11-NOV-13	249	13-NOV-13	2.48	Y	16.1181	16.1181	0.908259	0.908259	0.500775	0.500775	82.3213	40	40	40	0	1	1	0	0	2	76	0	0	0	1	0	0	0	0	0	999
1919041	18-FEB-14	21-FEB-14	3.4	21-FEB-14	9999999	21-FEB-14	132	18-FEB-14	0.52	18-FEB-14	6.7	21-FEB-14	315	21-FEB-14	112	21-FEB-14	156	21-FEB-14	1.6	21-FEB-14	2.11	Y	1.90211	1.90211	0.746688	0.746688	1	-0.653926	31.5529	31.5529	32.9466	33	1	0	0	0	1	1	3	0	0	0	0	0	1	1	0	0	1
1060374	14-APR-13	17-APR-13	8.1	27-JAN-15	161	27-JAN-15	132	27-JAN-15	3.2	27-JAN-15	1.3	27-JAN-15	33	27-JAN-15	24	27-JAN-15	190	27-JAN-15	2.9	27-JAN-15	1.18	Y	0.262364	0.262364	0.165514	0.165514	1.16315	1.16315	20.4069	20.4069	23.6397	24	1	1	1	0	0	4	11	0	0	1	1	0	0	0	0	0	999
1539821	23-MAR-15	26-MAR-15	9.3	07-MAR-16	9999999	07-MAR-16	136	07-MAR-16	234.46	07-MAR-16	1.1	07-MAR-16	22	07-MAR-16	12	07-MAR-16	76	07-MAR-16	3.2	05-JUN-15	1.21	Y	0.0953102	0.0953102	0.19062	0.19062	5.45728	5.45728	61.1514	40	40	40	2	1	0	0	1	2	8	0	0	0	0	0	0	0	0	0	999
2054144	07-APR-11	09-APR-11	3.3	09-APR-11	57	09-APR-11	141	09-APR-11	0.9	09-APR-11	2.1	09-APR-11	75	09-APR-11	42	09-APR-11	100	09-APR-11	2	09-APR-11	1.57		0.741937	0.741937	0.451076	0.451076	1	-0.105361	23.8566	23.8566	21.7256	22	1	1	0	0	0	1	2	0	0	0	0	0	1	1	1	0	999
1680323	27-APR-11	06-MAY-11	8.4	23-AUG-12	206	23-AUG-12	134	25-SEP-12	1.21	25-SEP-12	0.6	25-SEP-12	12	25-SEP-12	10	25-SEP-12	118	25-SEP-12	3.9	25-SEP-12	1.26	Y	1	-0.510826	0.231112	0.231112	0.19062	0.19062	14.6227	14.6227	17.135	17	1	0	0	0	1	4	22	1	0	0	0	0	1	0	0	0	999
1818602	17-JUN-12	20-JUN-12	7	19-JUN-12	119	19-JUN-12	139	19-JUN-12	1.82	19-JUN-12	0.8	19-JUN-12	40	19-JUN-12	17	19-JUN-12	65	19-JUN-12	1.6	19-JUN-12	1.04	Y	1	-0.223144	0.0392207	0.0392207	0.598837	0.598837	16.3801	16.3801	14.8212	15	1	1	0	0	1	1	3	0	0	0	0	0	1	1	0	0	1
1306511	19-NOV-12	30-NOV-12	4.6	30-NOV-12	85	30-NOV-12	135	30-NOV-12	3.33	30-NOV-12	2	27-NOV-12	63	27-NOV-12	18	27-NOV-12	89	27-NOV-12	2.8	27-NOV-12	1.44	Y	0.693147	0.693147	0.364643	0.364643	1.20297	1.20297	24.6465	24.6465	25.6599	26	2	1	1	0	1	1	11	0	0	0	0	0	0	0	0	0	999
1440695	14-MAR-11	15-MAR-11	6.4	21-JUL-13	9999999	21-JUL-13	126	21-JUL-13	1.31	21-JUL-13	18.4	16-JUL-13	351	16-JUL-13	132	16-JUL-13	52	16-JUL-13	2.2	16-JUL-13	1.36	Y	2.91235	2.91235	0.307485	0.307485	0.270027	0.270027	23.4667	23.4667	29.4683	29	1	0	0	0	0	2	61	0	0	0	1	0	1	0	0	0	999
2277061	16-OCT-13	19-OCT-13	4.8	19-OCT-13	80	19-OCT-13	136	19-OCT-13	0.72	19-OCT-13	3.9	19-OCT-13	53	19-OCT-13	30	19-OCT-13	68	19-OCT-13	2.2	19-OCT-13	1.97		1.36098	1.36098	0.678034	0.678034	1	-0.328504	28.7385	28.7385	29.1101	29	1	0	0	0	0	1	3	0	0	0	0	0	0	0	1	0	999
8256546	11-JUN-14	18-JUN-14	10.8	16-JUN-14	172	16-JUN-14	136	16-JUN-14	5.69	16-JUN-14	28.8	16-JUN-14	261	16-JUN-14	73	16-JUN-14	151	16-JUN-14	2	16-JUN-14	1.70	Y	3.36038	3.36038	0.530628	0.530628	1.73871	1.73871	41.7147	40	40	40	1	0	0	1	0	1	7	0	0	0	1	0	1	0	0	0	999
0793178	06-FEB-14	18-FEB-14	8.6	13-NOV-14	238	13-NOV-14	141	13-NOV-14	0.77	13-NOV-14	0.5	13-NOV-14	18	13-NOV-14	14	13-NOV-14	58	13-NOV-14	3.6	13-NOV-14	0.98	Y	1	-0.693147	-0.0202027	-0.0202027	1	-0.261365	19.5537	19.5537	16.8548	17	3	1	0	0	0	1	12	0	0	0	0	0	0	0	0	0	999
1684847	05-FEB-15	14-FEB-15	11.3	12-FEB-15	9999999	12-FEB-15	136	12-FEB-15	1.08	12-FEB-15	3.4	12-FEB-15	26	12-FEB-15	12	12-FEB-15	154	12-FEB-15	3.6	12-FEB-15	1.15	Y	1.22378	1.22378	0.139762	0.139762	0.076961	0.076961	13.3577	13.3577	14.2369	14	2	0	0	0	1	1	9	0	0	0	0	0	0	0	1	0	999
1269402	09-APR-15	11-APR-15	9	10-APR-15	9999999	10-APR-15	151	10-APR-15	0.38	10-APR-15	16	10-APR-15	135	10-APR-15	52	10-APR-15	91	10-APR-15	2.2	10-APR-15	1.76	Y	2.77259	2.77259	0.565314	0.565314	1	-0.967584	32.8119	32.8119	29.491	29	1	0	0	0	0	1	2	0	0	0	1	0	1	1	1	0	1
0546995	22-AUG-15	31-AUG-15	13.3	30-AUG-15	9999999	30-AUG-15	136	30-AUG-15	1.48	30-AUG-15	14.5	30-AUG-15	120	30-AUG-15	54	30-AUG-15	153	30-AUG-15	4.4	30-AUG-15	1.51	Y	2.67415	2.67415	0.41211	0.41211	0.392042	0.392042	24.9058	24.9058	25.4039	25	1	0	1	1	1	1	9	0	0	0	1	0	1	0	1	0	999
0568415	28-SEP-15	30-SEP-15	6.8	01-JUL-16	75	01-JUL-16	134	01-JUL-16	1.14	01-JUL-16	1.8	01-JUL-16	53	01-JUL-16	23	01-JUL-16	110	01-JUL-16	3.6	29-DEC-15	1.17	Y	0.587787	0.587787	0.157004	0.157004	0.131028	0.131028	11.6642	11.6642	14.4695	14	1	0	0	0	1	6	21	2	1	0	0	0	1	1	1	0	1
0880448	24-JUL-12	01-AUG-12	7.4	12-AUG-12	9999999	12-AUG-12	128	12-AUG-12	1.45	12-AUG-12	38.4	12-AUG-12	147	12-AUG-12	64	12-AUG-12	98	12-AUG-12	2	12-AUG-12	1.90	Y	3.64806	3.64806	0.641854	0.641854	0.371564	0.371564	30.9643	30.9643	33.6479	34	1	0	0	1	1	2	15	1	0	0	0	0	1	0	0	0	999
1568036	15-FEB-13	10-APR-13	11.1	10-APR-13	74	10-APR-13	136	10-APR-13	4.07	10-APR-13	2.2	10-APR-13	45	10-APR-13	15	10-APR-13	53	10-APR-13	2.7	10-APR-13	2.56	Y	0.788457	0.788457	0.940007	0.940007	1.40364	1.40364	33.3713	33.3713	33.5901	34	1	0	1	0	0	1	30	0	0	0	1	0	1	0	1	0	999
1210402	07-APR-13	17-APR-13	7.7	16-APR-13	76	16-APR-13	143	16-APR-13	1.44	16-APR-13	1.9	15-APR-13	103	15-APR-13	23	15-APR-13	117	15-APR-13	2.3	15-APR-13	1.26	Y	0.641854	0.641854	0.231112	0.231112	0.364643	0.364643	14.9343	14.9343	9.97128	10	1	1	0	0	0	1	10	0	0	0	1	0	1	0	0	0	999
2285618	27-MAR-14	29-MAR-14	6.9	15-MAY-14	143	15-MAY-14	135	15-MAY-14	1.83	15-MAY-14	6.1	15-MAY-14	61	15-MAY-14	21	15-MAY-14	143	15-MAY-14	1.9	15-MAY-14	1.74		1.80829	1.80829	0.553885	0.553885	0.604316	0.604316	25.2521	25.2521	26.2255	26	0	1	0	0	1	1	2	0	0	0	0	0	1	0	0	0	999
1363591	27-JUN-13	03-JUL-13	4.3	07-JUL-16	147	07-JUL-16	136	07-JUL-16	1.04	07-JUL-16	0.5	07-JUL-16	27	07-JUL-16	17	07-JUL-16	102	07-JUL-16	4.1	03-DEC-15	1.09	Y	1	-0.693147	0.0861777	0.0861777	0.0392207	0.0392207	11.5505	11.5505	12.4894	12	2	0	0	0	1	1	6	0	0	0	0	0	0	0	1	0	999
0377112	28-AUG-15	05-SEP-15	10.7	21-SEP-15	214	21-SEP-15	129	21-SEP-15	0.8	21-SEP-15	0.7	21-SEP-15	20	21-SEP-15	20	21-SEP-15	177	21-SEP-15	2.5	21-SEP-15	1.11	Y	1	-0.356675	0.10436	0.10436	1	-0.223144	20.9488	20.9488	25.9783	26	2	1	0	1	1	2	21	1	0	0	0	0	1	0	0	0	999
1798590	21-AUG-14	26-AUG-14	9.6	30-OCT-15	175	30-OCT-15	134	30-OCT-15	5.08	30-OCT-15	0.4	17-SEP-15	13	17-SEP-15	10	17-SEP-15	89	17-SEP-15	2.1	17-SEP-15	1.11	Y	1	-0.916291	0.10436	0.10436	1.62531	1.62531	26.9331	26.9331	28.2267	28	1	0	0	0	1	7	16	5	1	0	0	0	0	0	1	0	999
1804663	27-DEC-09	31-DEC-09	5.9	01-SEP-10	81	01-SEP-10	138	01-SEP-10	1.01	01-SEP-10	1.9	01-SEP-10	51	01-SEP-10	37	01-SEP-10	89	01-SEP-10	3.5	01-SEP-10	1.09	Y	0.641854	0.641854	0.0861777	0.0861777	0.00995033	0.00995033	9.91662	9.91662	8.92387	9	2	0	0	0	1	2	4	0	0	0	0	0	1	1	1	0	1
1347224	22-MAR-11	04-APR-11	7.1	04-APR-11	121	04-APR-11	131	04-APR-11	0.56	04-APR-11	2.1	27-MAR-11	43	27-MAR-11	21	27-MAR-11	90	27-MAR-11	2.1	27-MAR-11	1.24	Y	0.741937	0.741937	0.215111	0.215111	1	-0.579818	21.2138	21.2138	24.9334	25	1	0	0	0	1	1	13	0	0	0	0	0	0	0	0	0	999
0761824	02-JUN-11	08-JUN-11	2.2	07-JUN-11	9999999	07-JUN-11	136	07-JUN-11	1.46	07-JUN-11	9999999	02-JUN-11	29	02-JUN-11	18	02-JUN-11	90	02-JUN-11	1.4	02-JUN-11	1.33	Y	16.1181	16.1181	0.285179	0.285179	0.378436	0.378436	74.172	40	40	40	2	0	0	0	1	1	6	0	0	0	1	0	1	0	0	0	999
1684566	10-FEB-12	29-MAR-12	7.5	28-MAR-12	50	28-MAR-12	139	28-MAR-12	2.44	28-MAR-12	49.2	28-MAR-12	178	28-MAR-12	88	28-MAR-12	79	28-MAR-12	3.9	28-MAR-12	2.06	Y	3.89589	3.89589	0.722706	0.722706	0.891998	0.891998	37.7872	37.7872	37.6412	38	1	0	0	1	1	1	30	0	0	0	1	0	0	0	1	0	999
8063267	12-FEB-15	15-FEB-15	9	19-FEB-15	337	19-FEB-15	138	28-SEP-15	2.38	28-SEP-15	0.3	28-SEP-15	7	28-SEP-15	7	28-SEP-15	57	28-SEP-15	2.6	28-SEP-15	1.01	Y	1	-1.20397	0.00995033	0.00995033	0.8671	0.8671	18.6196	18.6196	17.914	18	1	1	1	0	1	1	3	0	0	0	0	0	0	0	0	0	999
7031524	31-OCT-14	04-NOV-14	6.4	04-NOV-14	79	04-NOV-14	136	04-NOV-14	0.64	04-NOV-14	2	04-NOV-14	44	04-NOV-14	27	04-NOV-14	59	04-NOV-14	2.4	04-NOV-14	1.21	Y	0.693147	0.693147	0.19062	0.19062	1	-0.446287	20.755	20.755	21.3901	21	1	0	0	0	1	1	4	0	0	0	0	0	0	1	1	0	1
1498390	07-JUL-14	10-JUL-14	7	09-NOV-14	92	09-NOV-14	126	09-NOV-14	0.68	09-NOV-14	2.7	09-NOV-14	66	09-NOV-14	27	09-NOV-14	94	09-NOV-14	1.5	09-NOV-14	1.93	Y	0.993252	0.993252	0.65752	0.65752	1	-0.385662	27.1187	27.1187	31.7946	32	1	0	0	1	1	2	8	0	0	0	0	0	0	1	0	0	999
7098328	10-AUG-15	13-AUG-15	6.4	12-AUG-15	9999999	12-AUG-15	136	12-AUG-15	0.58	12-AUG-15	13.3	12-AUG-15	374	12-AUG-15	449	12-AUG-15	213	12-AUG-15	2.4	12-AUG-15	1.12		2.58776	2.58776	0.113329	0.113329	1	-0.544727	27.051	27.051	27.4783	27	2	1	0	0	0	1	3	0	0	0	0	0	1	0	0	0	999
1617531	16-SEP-10	26-SEP-10	5.7	22-SEP-10	43	22-SEP-10	140	22-SEP-10	0.92	22-SEP-10	9999999	20-SEP-10	36	20-SEP-10	20	20-SEP-10	109	20-SEP-10	1.4	20-SEP-10	1.46	Y	16.1181	16.1181	0.378436	0.378436	1	-0.0833816	81.1649	40	40	40	2	1	0	0	1	1	10	0	0	0	0	0	0	0	0	0	999
0898484	07-MAY-09	15-MAY-09	6.3	27-MAY-11	55	27-MAY-11	136	25-MAY-11	0.85	25-MAY-11	1.7	27-MAY-11	34	27-MAY-11	23	27-MAY-11	130	27-MAY-11	3.1	27-MAY-11	1.10		0.530628	0.530628	0.0953102	0.0953102	1	-0.162519	19.0732	19.0732	19.7638	20	0	0	0	0	1	3	22	1	0	0	0	0	1	0	0	0	999
2079978	22-NOV-11	01-DEC-11	7.2	30-NOV-11	9999999	30-NOV-11	132	30-NOV-11	0.58	30-NOV-11	1.7	27-NOV-11	31	27-NOV-11	18	27-NOV-11	91	27-NOV-11	3.4	27-NOV-11	1.70		0.530628	0.530628	0.530628	0.530628	1	-0.544727	23.9488	23.9488	26.5973	27	1	0	0	0	1	1	9	0	0	0	0	0	1	0	1	0	999
2001493	04-SEP-09	14-SEP-09	3.3	06-MAR-12	86	06-MAR-12	137	06-MAR-12	1.47	06-MAR-12	3	03-MAR-12	44	03-MAR-12	18	03-MAR-12	93	03-MAR-12	3.5	12-MAR-12	1.16	Y	1.09861	1.09861	0.14842	0.14842	0.385262	0.385262	15.932	15.932	15.932	16	0	0	0	0	0	2	23	0	0	0	0	0	0	0	0	0	999
1757322	12-APR-10	14-APR-10	6.6	25-MAR-12	9999999	25-MAR-12	139	25-MAR-12	0.65	25-MAR-12	9999999	25-MAR-12	202	25-MAR-12	178	25-MAR-12	88	25-MAR-12	3.9	25-MAR-12	1.13	Y	16.1181	16.1181	0.122218	0.122218	1	-0.430783	78.2952	40	40	40	2	0	0	0	1	1	2	0	0	0	0	0	0	1	0	0	1
0115165	04-OCT-09	05-OCT-09	1.1	12-MAR-13	9999999	12-MAR-13	139	12-MAR-13	1.29	12-MAR-13	9999999	09-MAR-13	44	09-MAR-13	37	09-MAR-13	101	09-MAR-13	1.8	09-MAR-13	1.78	Y	16.1181	16.1181	0.576613	0.576613	0.254642	0.254642	76.2514	40	40	40	2	0	1	0	1	3	21	0	0	0	1	0	0	1	0	0	1
0617068	14-JUL-13	17-JUL-13	2.4	11-SEP-14	76	11-SEP-14	142	11-SEP-14	0.9	11-SEP-14	9999999	09-SEP-14	55	09-SEP-14	41	09-SEP-14	114	09-SEP-14	4.1	09-SEP-14	1.22		16.1181	16.1181	0.198851	0.198851	1	-0.105361	79.1535	40	40	40	2	1	0	0	0	2	8	0	0	0	0	0	1	0	0	0	999
2094592	17-SEP-14	04-OCT-14	10.9	04-OCT-14	9999999	04-OCT-14	153	04-OCT-14	0.79	04-OCT-14	23.4	04-OCT-14	107	04-OCT-14	62	04-OCT-14	146	04-OCT-14	4	04-OCT-14	1.68		3.15274	3.15274	0.518794	0.518794	1	-0.235722	33.7278	33.7278	30.4161	30	1	0	1	0	0	1	17	0	0	1	0	0	1	0	1	0	999
7032504	05-NOV-14	11-NOV-14	3.1	11-NOV-14	69	11-NOV-14	139	11-NOV-14	0.69	11-NOV-14	1.1	09-NOV-14	42	09-NOV-14	39	09-NOV-14	100	09-NOV-14	2.6	09-NOV-14	1.06		0.0953102	0.0953102	0.0582689	0.0582689	1	-0.371064	17.0129	17.0129	15.4957	15	1	1	0	0	0	1	6	0	0	0	0	0	0	1	0	0	999
2085202	29-NOV-14	01-DEC-14	5.6	01-DEC-14	86	01-DEC-14	140	01-DEC-14	1.02	01-DEC-14	9999999	29-NOV-14	44	29-NOV-14	27	29-NOV-14	112	29-NOV-14	3.1	29-NOV-14	1.25	Y	16.1181	16.1181	0.223144	0.223144	0.0198026	0.0198026	70.0451	40	40	40	1	0	0	0	1	1	2	0	0	0	0	0	0	0	0	0	999
0505247	16-JAN-15	20-JAN-15	11.7	19-JAN-15	9999999	19-JAN-15	137	19-JAN-15	1.76	19-JAN-15	9999999	19-JAN-15	178	19-JAN-15	96	19-JAN-15	132	19-JAN-15	1.9	19-JAN-15	1.72		16.1181	16.1181	0.542324	0.542324	0.565314	0.565314	78.8405	40	40	40	1	0	0	0	0	1	4	0	0	0	1	0	1	1	0	0	999
2040429	28-AUG-12	31-AUG-12	6.2	06-MAY-15	120	06-MAY-15	136	08-JUL-15	1.49	08-JUL-15	1.9	08-JUL-15	27	08-JUL-15	9	08-JUL-15	98	08-JUL-15	4.1	08-JUL-15	1.08	Y	0.641854	0.641854	0.076961	0.076961	0.398776	0.398776	13.5345	13.5345	14.4078	14	1	0	1	0	1	4	15	0	1	0	0	0	0	0	0	0	999
0379783	23-AUG-15	07-SEP-15	5.7	06-SEP-15	9999999	06-SEP-15	153	07-SEP-15	2.85	07-SEP-15	1.3	07-SEP-15	862	07-SEP-15	402	07-SEP-15	67	07-SEP-15	4	07-SEP-15	3.14	Y	0.262364	0.262364	1.14422	1.14422	1.04732	1.04732	30.2599	30.2599	25.1171	25	1	1	1	1	0	1	15	0	0	0	1	0	1	0	0	0	999
1151716	16-SEP-12	17-SEP-12	5.2	28-MAR-16	9999999	28-MAR-16	130	28-MAR-16	1.13	28-MAR-16	9999999	23-MAR-16	50	23-MAR-16	28	23-MAR-16	257	23-MAR-16	2.3	19-SEP-15	1.09	Y	16.1181	16.1181	0.0861777	0.0861777	0.122218	0.122218	69.4912	40	40	40	1	1	1	0	1	7	25	1	0	0	0	0	0	1	1	0	999
1109879	02-JUL-15	09-JUL-15	6.4	19-OCT-15	216	19-OCT-15	136	19-OCT-15	0.69	19-OCT-15	9999999	20-OCT-15	67	19-OCT-15	23	19-OCT-15	156	19-OCT-15	3.2	19-OCT-15	1.09	Y	16.1181	16.1181	0.0861777	0.0861777	1	-0.371064	77.8916	40	40	40	1	0	1	1	1	2	19	1	0	0	0	0	0	0	0	0	999
0844596	07-MAY-10	09-MAY-10	8.4	09-MAY-10	259	09-MAY-10	132	09-MAY-10	0.67	09-MAY-10	9999999	08-MAY-10	133	07-MAY-10	37	07-MAY-10	278	07-MAY-10	2.6	07-MAY-10	1.41	Y	16.1181	16.1181	0.34359	0.34359	1	-0.400478	80.7746	40	40	40	1	0	0	1	1	1	2	0	0	0	0	0	0	0	1	0	999
1955870	02-APR-09	08-APR-09	20	10-MAY-10	9999999	10-MAY-10	139	10-MAY-10	2.24	10-MAY-10	9999999	07-MAY-10	32	07-MAY-10	29	07-MAY-10	118	07-MAY-10	3.3	07-MAY-10	1.91	Y	16.1181	16.1181	0.647103	0.647103	0.806476	0.806476	82.3219	40	40	40	1	1	1	0	0	5	51	0	2	0	0	0	1	0	1	0	999
1349733	24-FEB-12	06-MAR-12	11.4	05-MAR-12	9999999	05-MAR-12	142	05-MAR-12	3.4	05-MAR-12	9.5	05-MAR-12	169	05-MAR-12	29	05-MAR-12	256	05-MAR-12	3.7	05-MAR-12	1.38	Y	2.25129	2.25129	0.322083	0.322083	1.22378	1.22378	30.2587	30.2587	28.6514	29	1	0	0	0	0	1	11	0	0	1	1	0	1	0	0	0	999
0869633	03-APR-12	08-APR-12	17.7	08-APR-12	9999999	08-APR-12	135	08-APR-12	4.57	08-APR-12	9999999	08-APR-12	33	08-APR-12	18	08-APR-12	68	08-APR-12	4	08-APR-12	1.69	Y	16.1181	16.1181	0.524729	0.524729	1.51951	1.51951	87.7751	40	40	40	2	1	1	0	0	1	5	0	0	0	1	0	1	1	1	0	999
2102072	14-SEP-12	23-SEP-12	5.8	23-SEP-12	76	23-SEP-12	135	23-SEP-12	3.18	23-SEP-12	3.7	23-SEP-12	26	23-SEP-12	8	23-SEP-12	33	23-SEP-12	3.5	23-SEP-12	2.08	Y	1.30833	1.30833	0.732368	0.732368	1.15688	1.15688	30.6494	30.6494	31.2665	31	1	0	1	0	0	1	9	0	0	0	0	0	1	0	1	0	999
8079889	14-FEB-13	16-FEB-13	3.4	16-FEB-13	39	16-FEB-13	133	16-FEB-13	0.91	16-FEB-13	2.3	16-FEB-13	43	16-FEB-13	25	16-FEB-13	95	16-FEB-13	2.4	16-FEB-13	1.44		0.832909	0.832909	0.364643	0.364643	1	-0.0943107	23.2324	23.2324	25.4457	25	1	1	1	0	1	1	2	0	0	0	0	0	0	0	0	0	999
0225695	24-DEC-15	24-JAN-16	4.6	11-DEC-15	57	11-DEC-15	134	11-DEC-15	0.96	11-DEC-15	2.8	11-DEC-15	67	11-DEC-15	38	11-DEC-15	175	11-DEC-15	2.4	11-DEC-15	1.33	Y	1.02962	1.02962	0.285179	0.285179	1	-0.040822	23.086	23.086	24.7605	25	2	1	0	0	0	1	1	0	0	0	1	0	1	1	0	0	999
1929372	03-FEB-14	04-FEB-14	8.6	11-SEP-14	71	11-SEP-14	125	15-SEP-14	4.81	15-SEP-14	2.3	11-SEP-14	45	11-SEP-14	18	11-SEP-14	267	11-SEP-14	3.1	11-SEP-14	1.39	Y	0.832909	0.832909	0.329304	0.329304	1.5707	1.5707	28.2982	28.2982	32.9321	33	1	0	0	0	1	3	11	1	0	0	0	0	1	1	1	0	999
1608262	03-APR-15	10-APR-15	10	02-MAY-15	9999999	02-MAY-15	144	02-MAY-15	0.48	02-MAY-15	4.7	02-MAY-15	436	02-MAY-15	594	02-MAY-15	378	02-MAY-15	1.4	02-MAY-15	1.44		1.54756	1.54756	0.364643	0.364643	1	-0.733969	25.9338	25.9338	22.6845	23	1	0	0	0	1	2	22	1	0	0	0	0	0	0	1	0	999
7096922	04-AUG-15	05-AUG-15	5.5	05-AUG-15	85	05-AUG-15	140	05-AUG-15	2.21	05-AUG-15	9999999	05-AUG-15	69	05-AUG-15	33	05-AUG-15	212	05-AUG-15	2.2	05-AUG-15	1.28		16.1181	16.1181	0.24686	0.24686	0.792993	0.792993	77.7102	40	40	40	1	0	0	0	0	1	1	0	0	0	0	0	1	0	1	0	999
0891887	13-MAR-12	18-MAR-12	5.4	08-AUG-15	119	08-AUG-15	137	08-AUG-15	1.34	08-AUG-15	1.4	08-AUG-15	99	08-AUG-15	29	08-AUG-15	184	08-AUG-15	2.3	08-AUG-15	1.17	Y	0.336472	0.336472	0.157004	0.157004	0.29267	0.29267	12.2612	12.2612	12.2612	12	1	0	0	0	1	1	5	0	0	0	0	0	0	1	0	0	1
1459540	01-JAN-12	03-JAN-12	4.2	18-AUG-16	131	18-AUG-16	139	18-AUG-16	0.79	18-AUG-16	9999999	23-JUL-16	37	23-JUL-16	37	23-JUL-16	480	23-JUL-16	3.6	15-DEC-15	1.12	Y	16.1181	16.1181	0.113329	0.113329	1	-0.235722	78.1957	40	40	40	1	1	1	0	1	12	60	0	2	0	0	0	0	0	0	0	999
1973676	12-APR-15	14-APR-15	6.6	16-AUG-16	95	16-AUG-16	136	16-AUG-16	0.97	16-AUG-16	2.4	16-AUG-16	29	16-AUG-16	15	16-AUG-16	146	16-AUG-16	3	28-DEC-15	1.21		0.875469	0.875469	0.19062	0.19062	1	-0.0304592	21.4442	21.4442	22.0566	22	1	1	0	0	1	2	8	0	0	0	0	0	1	0	1	0	999
1945054	08-APR-10	12-APR-10	8.8	04-JUL-10	9999999	04-JUL-10	128	04-JUL-10	0.86	04-JUL-10	1.3	04-JUL-10	77	04-JUL-10	56	04-JUL-10	85	04-JUL-10	2.9	04-JUL-10	0.97		0.262364	0.262364	-0.0304592	-0.0304592	1	-0.150823	16.6506	16.6506	23.5854	24	3	1	1	1	1	1	4	0	0	0	0	0	0	1	0	0	999
0164148	28-JUL-10	30-JUL-10	11.3	12-OCT-10	87	12-OCT-10	153	12-OCT-10	0.78	12-OCT-10	9999999	12-OCT-10	77	12-OCT-10	29	12-OCT-10	92	12-OCT-10	2.2	12-OCT-10	1.68	Y	16.1181	16.1181	0.518794	0.518794	1	-0.248461	82.7369	40	40	40	0	1	1	1	1	2	6	1	0	0	0	0	1	1	1	0	999
0996140	06-NOV-11	02-DEC-11	21.7	29-NOV-11	9999999	29-NOV-11	126	29-NOV-11	3.68	29-NOV-11	30.6	29-NOV-11	111	29-NOV-11	74	29-NOV-11	104	29-NOV-11	3.7	29-NOV-11	3.24	Y	3.421	3.421	1.17557	1.17557	1.30291	1.30291	44.9967	40	40	40	2	0	0	0	1	1	26	0	0	0	1	0	1	0	0	0	999
0651530	10-FEB-12	11-FEB-12	4.1	22-FEB-12	99	22-FEB-12	136	22-FEB-12	0.5	22-FEB-12	2.1	22-FEB-12	124	22-FEB-12	60	22-FEB-12	184	22-FEB-12	9999999	22-FEB-12	1.40	Y	0.741937	0.741937	0.336472	0.336472	1	-0.693147	22.573	22.573	23.1481	23	1	1	1	1	1	1	1	0	0	0	0	0	0	1	1	0	999
1203381	26-NOV-08	02-DEC-08	12.2	29-OCT-12	33	29-OCT-12	136	29-OCT-12	1.54	29-OCT-12	2.6	26-OCT-12	47	26-OCT-12	56	26-OCT-12	205	26-OCT-12	1.4	26-OCT-12	1.75	Y	0.955511	0.955511	0.559616	0.559616	0.431782	0.431782	20.4417	20.4417	21.0871	21	1	1	1	0	0	10	55	1	1	0	0	0	0	0	0	0	999
0412298	29-DEC-14	30-DEC-14	9.1	24-JUN-16	9999999	24-JUN-16	132	24-JUN-16	3.73	24-JUN-16	0.4	24-JUN-16	80	24-JUN-16	71	24-JUN-16	206	24-JUN-16	3.2	16-OCT-15	0.95		1	-0.916291	-0.0512933	-0.0512933	1.31641	1.31641	22.2335	22.2335	25.165	25	1	1	1	0	1	4	15	1	0	0	0	0	0	0	1	0	999
1268861	21-MAR-10	23-MAR-10	4.2	08-OCT-14	9999999	08-OCT-14	137	08-OCT-14	0.76	08-OCT-14	2	08-OCT-14	58	08-OCT-14	47	08-OCT-14	74	08-OCT-14	3.4	08-OCT-14	1.17	Y	0.693147	0.693147	0.157004	0.157004	1	-0.274437	20.3785	20.3785	20.3785	20	1	1	1	1	1	3	7	0	0	0	0	0	0	1	0	0	1
8157255	29-JAN-14	04-FEB-14	5.8	01-JUL-16	160	01-JUL-16	137	01-JUL-16	9.79	01-JUL-16	1.2	01-JUL-16	23	01-JUL-16	31	01-JUL-16	49	01-JUL-16	3.3	30-DEC-15	1.06		0.182322	0.182322	0.0582689	0.0582689	2.28136	2.28136	29.6044	29.6044	29.6044	30	3	1	1	1	1	4	14	0	0	0	0	0	0	0	0	0	999
1923672	05-OCT-08	08-OCT-08	4.5	23-OCT-09	68	23-OCT-09	138	23-OCT-09	0.55	23-OCT-09	1.6	23-OCT-09	37	23-OCT-09	30	23-OCT-09	82	23-OCT-09	3.4	23-OCT-09	1.19	Y	0.470004	0.470004	0.173953	0.173953	1	-0.597837	19.7249	19.7249	19.0558	19	0	1	1	0	0	3	8	0	1	0	0	0	1	1	0	0	999
1526969	19-JUL-10	20-JUL-10	9.1	20-JUL-10	102	20-JUL-10	140	20-JUL-10	1.31	20-JUL-10	4.5	20-JUL-10	105	20-JUL-10	67	20-JUL-10	133	20-JUL-10	2.6	20-JUL-10	1.45		1.50408	1.50408	0.371564	0.371564	0.270027	0.270027	18.8611	18.8611	16.7683	17	0	0	0	1	1	1	1	1	0	0	0	0	1	0	0	0	999
0874383	29-NOV-10	29-NOV-10	13.8	29-NOV-10	9999999	29-NOV-10	142	29-NOV-10	40.6	29-NOV-10	9999999	29-NOV-10	84	29-NOV-10	55	29-NOV-10	158	29-NOV-10	1.9	29-NOV-10	2.06		16.1181	16.1181	0.722706	0.722706	3.70377	3.70377	110.896	40	40	40	3	1	1	0	0	1	1	0	0	1	0	0	1	0	0	0	999
2136649	18-DEC-12	28-DEC-12	5.6	07-JUN-16	9999999	07-JUN-16	142	06-JUN-16	1.08	06-JUN-16	0.4	06-JUN-16	26	06-JUN-16	27	06-JUN-16	80	06-JUN-16	4	01-JUN-15	1.07	Y	1	-0.916291	0.0676586	0.0676586	0.076961	0.076961	11.7043	11.7043	7.0355	7	1	1	1	1	1	1	10	0	0	0	0	0	0	1	0	0	999
0890096	16-MAR-12	19-MAR-12	9.2	19-AUG-13	288	19-AUG-13	130	19-AUG-13	5.2	19-AUG-13	0.6	18-AUG-13	25	18-AUG-13	20	18-AUG-13	231	18-AUG-13	2.2	18-AUG-13	1.35	Y	1	-0.510826	0.300105	0.300105	1.64866	1.64866	29.3488	29.3488	31.8093	32	2	0	1	0	1	11	57	5	3	0	0	0	0	0	0	0	999
0690203	25-MAR-13	06-APR-13	19.6	03-JUL-13	96	03-JUL-13	132	03-JUL-13	1.87	03-JUL-13	9999999	03-JUL-13	32	03-JUL-13	47	03-JUL-13	135	03-JUL-13	2.3	03-JUL-13	1.84		16.1181	16.1181	0.609766	0.609766	0.625938	0.625938	80.176	40	40	40	2	0	0	0	1	2	32	0	1	0	0	0	0	0	1	0	999
0398106	08-FEB-14	10-MAR-14	2.9	16-AUG-16	92	16-AUG-16	136	16-AUG-16	1.08	16-AUG-16	9999999	11-AUG-16	31	11-AUG-16	15	11-AUG-16	54	11-AUG-16	3.4	03-MAY-14	1.20	Y	16.1181	16.1181	0.182322	0.182322	0.076961	0.076961	70.1349	40	40	40	1	0	0	0	0	2	65	0	0	0	0	0	1	1	1	0	999
2214196	21-MAR-14	31-MAR-14	10.5	15-MAY-14	45	15-MAY-14	131	15-MAY-14	4.91	15-MAY-14	9999999	11-MAY-14	22	04-MAY-14	16	04-MAY-14	70	04-MAY-14	3.2	04-MAY-14	1.90	Y	16.1181	16.1181	0.641854	0.641854	1.59127	1.59127	89.7737	40	40	40	2	1	1	1	1	2	36	0	1	0	0	0	1	0	0	0	999
0284755	07-AUG-14	09-AUG-14	8.4	09-AUG-14	215	09-AUG-14	132	09-AUG-14	1.09	09-AUG-14	9999999	07-AUG-14	35	07-AUG-14	19	07-AUG-14	65	07-AUG-14	9999999	08-AUG-14	1.35		16.1181	16.1181	0.300105	0.300105	0.0861777	0.0861777	71.5423	40	40	40	1	1	1	1	1	1	2	0	0	0	0	0	0	0	1	0	999
7042156	19-DEC-14	21-DEC-14	6.3	21-DEC-14	56	21-DEC-14	140	21-DEC-14	0.39	21-DEC-14	9999999	19-DEC-14	28	19-DEC-14	26	19-DEC-14	242	19-DEC-14	2.5	19-DEC-14	1.20		16.1181	16.1181	0.182322	0.182322	1	-0.941609	78.9684	40	40	40	1	1	0	0	0	1	2	0	0	0	0	0	0	0	1	0	999
1878043	29-JAN-13	01-FEB-13	6.1	29-MAY-15	135	29-MAY-15	137	29-MAY-15	1.11	29-MAY-15	0.8	29-MAY-15	52	29-MAY-15	99	29-MAY-15	79	29-MAY-15	4.5	29-MAY-15	0.99	Y	1	-0.223144	-0.0100503	-0.0100503	0.10436	0.10436	11.0962	11.0962	11.0962	11	1	0	0	0	1	1	3	0	0	0	0	0	1	1	1	0	999
0909315	22-NOV-14	26-NOV-14	6.7	20-AUG-15	94	20-AUG-15	140	20-AUG-15	1.22	20-AUG-15	6.7	20-AUG-15	86	20-AUG-15	43	20-AUG-15	69	20-AUG-15	1.9	20-AUG-15	1.71	Y	1.90211	1.90211	0.536493	0.536493	0.198851	0.198851	21.5317	21.5317	19.7033	20	1	1	1	0	1	4	21	0	2	0	0	0	0	0	0	0	999
7000133	06-OCT-15	13-OCT-15	6.6	09-OCT-15	104	09-OCT-15	139	09-OCT-15	1.24	09-OCT-15	9999999	12-OCT-15	44	06-OCT-15	31	06-OCT-15	122	06-OCT-15	2.1	06-OCT-15	1.37	Y	16.1181	16.1181	0.314811	0.314811	0.215111	0.215111	72.9409	40	40	40	1	0	0	0	1	1	7	0	0	0	0	0	0	1	1	0	999
1738032	05-SEP-10	07-SEP-10	5.2	20-SEP-10	152	20-SEP-10	139	20-SEP-10	1.7	20-SEP-10	9999999	20-SEP-10	23	20-SEP-10	26	20-SEP-10	86	20-SEP-10	3.8	20-SEP-10	1.18	Y	16.1181	16.1181	0.165514	0.165514	0.530628	0.530628	74.2883	40	40	40	0	1	0	0	0	1	2	0	0	1	0	0	1	0	0	0	999
2072614	16-MAR-11	26-MAR-11	11.6	23-MAR-11	9999999	23-MAR-11	127	23-MAR-11	7.29	23-MAR-11	21.8	23-MAR-11	115	23-MAR-11	74	23-MAR-11	244	23-MAR-11	3.6	23-MAR-11	1.66		3.08191	3.08191	0.506818	0.506818	1.9865	1.9865	42.7668	40	40	40	1	0	1	0	1	1	10	0	0	0	1	0	0	0	1	0	999
2054187	13-JUN-11	17-JUN-11	18.3	27-JUN-11	78	27-JUN-11	146	27-JUN-11	2.49	27-JUN-11	9999999	22-JUN-11	79	20-JUN-11	47	20-JUN-11	196	20-JUN-11	2.8	27-JUN-11	1.37	Y	16.1181	16.1181	0.314811	0.314811	0.912283	0.912283	79.6128	40	40	40	2	1	1	0	1	2	15	1	0	0	1	0	0	0	1	0	999
2115020	25-MAY-12	27-MAY-12	8.3	27-MAY-12	9999999	27-MAY-12	134	27-MAY-12	1.67	27-MAY-12	3.3	27-MAY-12	53	27-MAY-12	33	27-MAY-12	83	27-MAY-12	1.5	27-MAY-12	2.19	Y	1.19392	1.19392	0.783902	0.783902	0.512824	0.512824	24.6304	24.6304	26.152	26	2	0	0	0	1	1	2	0	0	0	0	0	1	0	1	0	999
1936011	14-JUL-11	21-JUL-11	3.9	10-NOV-12	73	10-NOV-12	139	10-NOV-12	0.9	10-NOV-12	2.1	08-NOV-12	41	08-NOV-12	13	08-NOV-12	41	08-NOV-12	2.9	08-NOV-12	1.09	Y	0.741937	0.741937	0.0861777	0.0861777	1	-0.105361	19.7697	19.7697	18.4345	18	1	0	1	0	1	2	20	0	0	0	0	0	0	0	1	0	999
0396224	25-JUN-13	29-JUN-13	4.6	28-JUN-13	36	28-JUN-13	138	28-JUN-13	1.57	28-JUN-13	3	26-JUN-13	78	26-JUN-13	29	26-JUN-13	90	26-JUN-13	2.7	26-JUN-13	2.34	Y	1.09861	1.09861	0.850151	0.850151	0.451076	0.451076	24.4212	24.4212	23.9071	24	1	0	0	1	1	1	4	0	0	0	0	0	1	0	0	0	999
0461184	09-JUL-13	11-JUL-13	10.7	11-JUL-13	9999999	11-JUL-13	134	11-JUL-13	1.25	11-JUL-13	8.7	11-JUL-13	2739	11-JUL-13	524	11-JUL-13	228	11-JUL-13	2	11-JUL-13	3.07	Y	2.16332	2.16332	1.12168	1.12168	0.223144	0.223144	29.3056	29.3056	30.3644	30	1	0	0	0	1	1	2	0	0	0	1	0	0	0	0	0	999
0474382	05-NOV-13	06-NOV-13	2.4	06-NOV-13	9999999	06-NOV-13	133	06-NOV-13	0.88	06-NOV-13	2.1	06-NOV-13	138	06-NOV-13	60	06-NOV-13	96	06-NOV-13	2.1	06-NOV-13	1.87		0.741937	0.741937	0.625938	0.625938	1	-0.127833	25.815	25.815	27.6874	28	0	0	0	0	0	1	1	0	0	0	0	0	1	1	0	0	999
8215543	17-MAR-14	06-APR-14	24.4	19-APR-14	9999999	19-APR-14	128	19-APR-14	0.71	19-APR-14	20.6	19-APR-14	125	19-APR-14	61	19-APR-14	138	19-APR-14	2.5	19-APR-14	1.79	Y	3.02529	3.02529	0.582216	0.582216	1	-0.34249	33.9564	33.9564	35.7514	36	1	0	0	0	0	2	51	1	0	0	0	0	0	0	1	0	999
2092275	12-MAY-14	25-MAY-14	9.7	19-JUN-14	128	19-JUN-14	135	19-JUN-14	3.46	19-JUN-14	1	19-JUN-14	58	19-JUN-14	29	19-JUN-14	117	19-JUN-14	2.9	19-JUN-14	1.37	Y	0	0	0.314811	0.314811	1.24127	1.24127	21.8348	21.8348	23.0337	23	1	0	0	0	1	2	56	0	1	0	0	1	1	0	0	0	999
1705945	22-DEC-08	24-DEC-08	6.6	24-NOV-14	186	24-NOV-14	139	24-NOV-14	1.5	24-NOV-14	0.5	24-NOV-14	17	24-NOV-14	11	24-NOV-14	34	24-NOV-14	4.4	24-NOV-14	1.0	Y	1	-0.693147	0	0	0.405465	0.405465	14.0903	14.0903	12.3803	12	1	1	0	0	0	3	5	0	0	1	0	0	1	0	1	0	999
0744232	16-MAR-15	24-MAR-15	9.9	23-MAR-15	170	23-MAR-15	140	24-MAR-15	0.94	24-MAR-15	1.6	18-MAR-15	79	18-MAR-15	34	18-MAR-15	642	18-MAR-15	2.3	08-APR-15	1.71	Y	0.470004	0.470004	0.536493	0.536493	1	-0.0618754	23.7853	23.7853	22.1801	22	1	0	1	0	1	1	8	0	0	0	1	0	0	0	1	0	999
0486136	22-JUL-14	24-JUL-14	3	24-APR-15	79	24-APR-15	137	24-APR-15	0.33	24-APR-15	1.2	21-APR-15	46	21-APR-15	32	21-APR-15	177	21-APR-15	3.3	24-APR-15	1.21	Y	0.182322	0.182322	0.19062	0.19062	1	-1.10866	18.8241	18.8241	18.8241	19	2	0	1	0	1	3	90	1	0	0	0	0	0	0	1	0	999
1022851	09-MAY-15	19-MAY-15	1.4	19-MAY-15	9999999	19-MAY-15	137	19-MAY-15	0.5	19-MAY-15	1.1	19-MAY-15	50	19-MAY-15	17	19-MAY-15	62	19-MAY-15	1.9	19-MAY-15	1.61		0.0953102	0.0953102	0.476234	0.476234	1	-0.693147	21.6941	21.6941	21.6941	22	1	0	0	0	1	1	10	0	0	0	0	0	0	1	0	0	999
1555375	28-OCT-12	29-OCT-12	7.9	12-JUN-16	173	12-JUN-16	124	11-JUN-16	1.73	11-JUN-16	9999999	01-JUN-16	63	24-MAY-16	35	24-MAY-16	540	24-MAY-16	4.4	12-NOV-15	3.34	Y	16.1181	16.1181	1.20597	1.20597	0.548121	0.548121	86.1088	40	40	40	1	0	1	0	0	9	69	4	1	0	1	0	0	0	0	0	999
[truncated: 10 more columns]

## Sheet: Included 2
Age	Gender	Ethnicity	Primary language	Insurance	ZIP CODE_INCOME (Median)	HOSP_ADMSN_TIME	HOSP_DISCH_TIME	WBC_VAL	WBC_RSLT_DT	PLATELET_VAL	PLATELET_RSLT_DT	SODIUM_VAL	SODIUM_RSLT_DT	CREATININE_VAL	CREATININE_RSLT_DT	BILIRUBIN_VAL	BILIRUBIN_RSLT_DT	AST_VAL	AST_RSLT_DT	ALT_VAL	ALT_RSLT_DT	ALP_VAL	ALP_RSLT_DT	ALBUMIN_VAL	ALBUMIN_RSLT_DT	INR	TRNSFSN	Tested LnL	Ln L	Tested LnV	Ln V	Tested LnJ	LnJ	Score	MELD score	MELD(i) + 1.32*(137-Na) – [0.033*MELD(i)*(137-Na)]	MELD-NA	Hx of DM (0,1)	Hx of CAD or CHF (0,1)	Hx of COPD (0,1)	Hx of Smoking (0,1)	Total hospital days admitted	# of admissions during study period	# of 90 Day Readmissions	90 day mortality (0,1)	Obtained liver transplantation (0,1)	Presence of encephalopathy (0,1)	Presensce of Varices (0,1)	Presence of ascities (0,1)
40-50	1	3	1	1	95842; $44,462	01-JUN-12	05-JUN-12	4.4	2018-05-07	81	2018-04-30	132	2018-05-07	1.03	2018-05-07	19.7	2018-05-07	364	2018-05-07	121	2018-05-07	278	2018-05-07	2.5	2018-05-07	1.42	Y	2.98062	2.98062	0.350657	0.350657	0.0295588	0.0295588	21.907	21.907	24.8923	25	0	0	0	1	6	3	0	0	0	0	0	1
40-50	1	3	1	2	95824; $29,747	22-OCT-12	25-OCT-12	8.8	06-SEP-15	270	06-SEP-15	138	06-SEP-15	1.01	06-SEP-15	5.4	06-SEP-15	80	06-SEP-15	22	06-SEP-15	216	06-SEP-15	2	06-SEP-15	1.42		1.6864	1.6864	0.350657	0.350657	0.00995033	0.00995033	16.8272	16.8272	16.0625	16	0	0	0	1	3	1	0	0	0	0		1
30-40	0	1	1	1	95608; $56,891	2016-08-22	2016-08-23	5.4	2017-07-05	142	2017-07-05	138	2017-07-05	0.84	2017-07-05	1.3	2017-07-05	31	2017-07-05	24	2017-07-05	141	2017-07-05	3.5	2017-07-05	1.55	Y	0.262364	0.262364	0.438255	0.438255	1	-0.174353	21.9002	21.9002	21.3029	21	0	0	0	0	0	1	0	0	0	0	1	1
60-70	0	1	1	2	95828; $45,710	2013-09-29	2013-10-11	6.5	10-OCT-13	212	10-OCT-13	120	10-OCT-13	1.39	10-OCT-13	2.7	07-OCT-13	63	07-OCT-13	26	07-OCT-13	92	07-OCT-13	1.8	07-OCT-13	1.20	N	0.993252	0.993252	0.182322	0.182322	0.329304	0.329304	15.3779	15.3779	29.1909	29	0	0	0	1	40	4	3	0	0	1	0	1
50-60	0	4	0	2	95758; $74,164	28-OCT-14	30-OCT-14	3.9	29-OCT-14	102	29-OCT-14	137	29-OCT-14	1.89	29-OCT-14	3	29-OCT-14	121	29-OCT-14	55	29-OCT-14	171	29-OCT-14	1.9	29-OCT-14	1.66	Y	1.09861	1.09861	0.506818	0.506818	0.636577	0.636577	22.3512	22.3512	22.3512	22	0	0	0	1	27	2	1	1	0	1	1	1
70-80	0	2	1	3	95828; $45,710	09-NOV-09	16-NOV-09	4.8	2018-01-27	137	2018-01-27	142	2018-01-27	0.7	2018-01-27	1.4	2018-01-27	39	2018-01-27	32	2018-01-27	226	2018-01-27	2.6	2018-01-27	1.29	Y	0.336472	0.336472	0.254642	0.254642	1	-0.356675	20.1239	20.1239	16.8443	17	0	1	0	1	35	3	1	0	0	1	1	1
50-60	0	1	1	0	95814; $31,409	16-NOV-11	18-NOV-11	4	18-NOV-11	98	18-NOV-11	139	18-NOV-11	0.65	18-NOV-11	0.9	16-NOV-11	45	16-NOV-11	30	16-NOV-11	157	16-NOV-11	2.6	16-NOV-11	1.33		1	-0.105361	0.285179	0.285179	1	-0.430783	22.974	22.974	21.8503	22	1	1	0	0	2	1	0	0	0	1		0
30-40	1	2	0	3	95207; $39,219	29-JAN-13	01-FEB-13	2.4	2013-06-28	50	2013-06-28	139	2013-06-28	0.59	2013-06-28	18.1	2013-06-28	64	2013-06-28	40	2013-06-28	55	2013-06-28	2.7	28-JUN-13	3.07	Y	2.89591	2.89591	1.12168	1.12168	1	-0.527633	39.5093	39.5093	39.477	39	0	0	0	0	28	3	1	0	0	0	1	1
50-60	0	1	1	0	95822; $47,405	03-AUG-13	05-AUG-13	5.4	10-AUG-13	154	10-AUG-13	133	10-AUG-13	1.12	10-AUG-13	0.7	04-AUG-13	21	04-AUG-13	11	04-AUG-13	121	04-AUG-13	3.3	04-AUG-13	1.18		1	-0.356675	0.165514	0.165514	0.113329	0.113329	13.1483	13.1483	16.6927	17	0	0	1	1	9	3	1	0	0	1	1	1
60-70	0	1	1	0	96097; $47,594	11-FEB-14	24-FEB-14	5.9	23-FEB-14	164	23-FEB-14	136	23-FEB-14	0.75	23-FEB-14	0.7	11-FEB-14	80	11-FEB-14	35	11-FEB-14	95	11-FEB-14	3.3	11-FEB-14	1.15	Y	1	-0.356675	0.139762	0.139762	1	-0.287682	21.3453	21.3453	21.9609	22	0	0	1	1	13	1	0	0	0	1	1	0
40-50	1	0	1	2	95670; $56,527	01-JUN-14	05-JUN-14	2.4	05-JUN-14	55	05-JUN-14	137	04-JUN-14	0.38	04-JUN-14	1.9	02-JUN-14	55	02-JUN-14	36	02-JUN-14	200	02-JUN-14	3	11-JUN-14	1.22	Y	0.641854	0.641854	0.198851	0.198851	1	-0.967584	20.6533	20.6533	20.6533	21	0	0	0	1	4	1	0	0	0	0	0	0
50-60	1	2	1	2	95822; $47,405	27-JUL-15	30-JUL-15	4.2	22-AUG-15	90	22-AUG-15	136	22-AUG-15	0.86	22-AUG-15	7.1	22-AUG-15	84	22-AUG-15	24	22-AUG-15	49	22-AUG-15	3.2	22-AUG-15	1.32	Y	1.96009	1.96009	0.277632	0.277632	1	-0.150823	26.5186	26.5186	26.9635	27	1	0	0	1	4	2	0	0	0	1	1	1
50-60	1	1	1	2	95815; $29,870	20-SEP-15	22-SEP-15	4.6	22-SEP-15	132	22-SEP-15	136	22-SEP-15	1.95	22-SEP-15	1.2	22-SEP-15	46	22-SEP-15	21	22-SEP-15	125	22-SEP-15	2.4	22-SEP-15	1.39	Y	0.182322	0.182322	0.329304	0.329304	0.667829	0.667829	17.1985	17.1985	17.951	18	0	0	0	1	23	4	2	0	0	1	1	1
60-70	1	1	1	3	95988; $60,739	25-NOV-13	27-NOV-13	3.7	25-NOV-13	106	25-NOV-13	128	26-NOV-13	0.69	25-NOV-13	1.1	25-NOV-13	36	25-NOV-13	21	25-NOV-13	179	25-NOV-13	2	25-NOV-13	1.11	Y	0.0953102	0.0953102	0.10436	0.10436	1	-0.371064	17.5291	17.5291	24.203	24	0	0	0	1	3	2	1	0	0	1	1	1
60-70	1	1	1	2	95834; $53,728	27-SEP-14	01-OCT-14	3.1	01-OCT-14	101	01-OCT-14	135	01-OCT-14	3.22	01-OCT-14	0.9	30-SEP-14	34	27-SEP-14	21	27-SEP-14	84	27-SEP-14	2.6	27-SEP-14	1.13	Y	1	-0.105361	0.122218	0.122218	1.16938	1.16938	22.7698	22.7698	23.907	24	1	1	1	1	99	20	19	1	0	1	1	1
50-60	1	1	1	2	95832; $42,652	09-NOV-15	12-NOV-15	3.2	19-NOV-15	30	19-NOV-15	128	20-NOV-15	0.66	20-NOV-15	4.7	19-NOV-15	77	19-NOV-15	60	19-NOV-15	249	19-NOV-15	2.5	19-NOV-15	1.39	Y	1.54756	1.54756	0.329304	0.329304	1	-0.415515	25.538	25.538	29.8332	30	1	0	1	1	38	7	6	0	0	1	1	1
50-60	1	2	1	2	95823; $39,294	28-OCT-13	30-OCT-13	4.6	26-JAN-14	110	26-JAN-14	137	26-JAN-14	0.75	26-JAN-14	2.6	26-JAN-14	68	26-JAN-14	44	26-JAN-14	117	26-JAN-14	3.2	26-JAN-14	1.13		0.955511	0.955511	0.122218	0.122218	1	-0.287682	20.9807	20.9807	20.9807	21	0	0	0	1	55	9	8	0	0	1	1	1
50-60	1	2	0	2	95901; $56,806	18-MAR-13	22-MAR-13	6.8	29-JUN-15	124	29-JUN-15	137	29-JUN-15	0.73	29-JUN-15	0.7	29-JUN-15	40	29-JUN-15	30	29-JUN-15	92	29-JUN-15	3.5	29-JUN-15	1.04		1	-0.356675	0.0392207	0.0392207	1	-0.314711	20.2193	20.2193	20.2193	20	1	0	0	0	4	1	0	0	0	0	1	1
40-50	0	1	1	2	95207; $39,219	01-AUG-15	18-AUG-15	12.4	18-AUG-15	77	18-AUG-15	132	18-AUG-15	0.69	18-AUG-15	8.9	18-AUG-15	90	18-AUG-15	52	18-AUG-15	81	18-AUG-15	1.9	18-AUG-15	2.15	Y	2.18605	2.18605	0.765468	0.765468	1	-0.371064	32.8365	32.8365	34.0185	34	1	0	0	0	17	1	0	0	0	1	0	0
50-60	0	1	1	3	95240; $59,988	08-AUG-15	25-AUG-15	8.7	19-AUG-15	69	19-AUG-15	140	22-AUG-15	1.75	22-AUG-15	11.3	19-AUG-15	16	19-AUG-15	7	19-AUG-15	68	19-AUG-15	3	19-AUG-15	1.42	Y	2.4248	2.4248	0.350657	0.350657	0.559616	0.559616	24.8786	24.8786	23.3816	23	0	0	0	0	22	2	1	0	0	0	0	1
50-60	0	1	1	1	95240; $59,988	12-FEB-15	14-FEB-15	6.2	16-MAY-16	150	16-MAY-16	140	16-MAY-16	0.89	16-MAY-16	0.6	16-MAY-16	29	16-MAY-16	24	16-MAY-16	66	16-MAY-16	3.7	06-OCT-15	1.12	Y	1	-0.510826	0.113329	0.113329	1	-0.116534	21.0493	21.0493	19.1732	19	0	0	0	1	5	2	0	0	0	0	0	1
60-70	1	4	0	2	95823; $39,294	19-AUG-14	21-AUG-14	1.7	15-AUG-16	25	15-AUG-16	140	15-AUG-16	1.42	15-AUG-16	1.5	15-AUG-16	24	15-AUG-16	20	15-AUG-16	47	15-AUG-16	3.6	09-DEC-15	1.18	Y	0.405465	0.405465	0.165514	0.165514	4.1676	4.1676	49.7003	40	40	40	1	0	0	0	81	21	13	0	0	1	1	1
40-50	1	1	1	3	95662; $86,695	18-NOV-14	22-NOV-14	20.6	22-NOV-14	274	22-NOV-14	135	22-NOV-14	0.53	22-NOV-14	14.7	22-NOV-14	262	22-NOV-14	28	22-NOV-14	431	22-NOV-14	1.5	22-NOV-14	1.57	Y	2.68785	2.68785	0.451076	0.451076	1	-0.634878	31.2121	31.2121	31.7921	32	0	0	0	1	4	1	0	0	0	1	0	1
30-40	0	2	1	2	95605; $42,266	24-AUG-10	25-AUG-10	9	02-MAY-16	188	02-MAY-16	138	02-MAY-16	0.93	02-MAY-16	0.9	02-MAY-16	22	02-MAY-16	20	02-MAY-16	50	02-MAY-16	4.1	10-NOV-15	0.98	Y	1	-0.105361	-0.0202027	-0.0202027	1	-0.0725707	19.5537	19.5537	18.879	19	0	0	0	1	34	6	3	0	1	1	0	1
60-70	1	4	1	2	95833; $58,008	10-MAY-15	14-MAY-15	3.4	14-JUN-16	59	14-JUN-16	138	14-JUN-16	2.03	14-JUN-16	2.7	11-JUN-16	34	11-JUN-16	12	11-JUN-16	86	11-JUN-16	3.5	10-MAY-15	1.18	Y	0.993252	0.993252	0.165514	0.165514	0.708036	0.708036	18.8142	18.8142	18.115	18	1	0	1	1	76	9	5	0	0	1	1	1
60-70	1	3	1	3	95824; $29,747	03-DEC-11	07-DEC-11	2.8	03-MAY-15	101	03-MAY-15	135	03-MAY-15	0.55	03-MAY-15	1.7	03-MAY-15	104	03-MAY-15	19	03-MAY-15	160	03-MAY-15	2.3	03-MAY-15	1.43		0.530628	0.530628	0.357674	0.357674	1	-0.597837	22.0117	22.0117	23.199	23	0	0	0	0	3	2	0	0	0	0	0	1
50-60	0	2	1	3	95831; $68,140	16-FEB-15	28-FEB-15	3.1	22-JUL-16	30	22-JUL-16	142	22-JUL-16	1.26	22-JUL-16	21.8	22-JUL-16	45	22-JUL-16	21	22-JUL-16	42	22-JUL-16	2.1	23-MAY-15	1.63	Y	3.08191	3.08191	0.48858	0.48858	0.231112	0.231112	25.7635	25.7635	23.4144	23	1	0	0	1	94	6	3	1	0	1	1	1
[truncated: 436 more rows]
[truncated: 11 more columns]
